# Supplementary material
Source: publisher figshare collection journal article supplement (https://gsapubs.figshare.com/ndownloader/files/22412031)
Supplement: Supplementary file 1 [file 22412031]

Archive with 5 entries (5 files):
- GS2108_SuppFileS1.pdf
- GS2108_SuppFileS1_SecondaryStandards.xlsx
- GS2108_SuppFileS2.pdf
- GS2108_SuppFileS3.xlsx
- SuppRefsCited.docx
