# Supplementary material
Source: publisher figshare collection journal article supplement (https://gsapubs.figshare.com/ndownloader/files/22412031)
Supplement: Supplementary file 1 [file 22412031 › GS2108_SuppFileS1_SecondaryStandards.xlsx]

## Sheet: Pak1
Soto-Kerans, G., Stockli, D., Janson, X., Lawton, T.F., and Covault, J.A., 2019, Orogen proximal sedimentation in the Permian foreland basin: Geosphere, v. 15, https://doi.org/10.1130/GES02108.1.
Supplemental File 1 Secondary Standards
Sample Name:								207/235		206/238		206/207		Best age
Grain #	[U] ppm	U/Th	207/235	2σ error	206/238	2σ error	RHO	Age Ma	2σ error	Age (Ma)	2σ error	Age (Ma)	2σ error	(Ma)	2σ error	% Discordance*
Pak1_1.FIN2	334.7	0.7807	0.045	0.0012	0.006824	9.7e-05	0.18627	44.6	1.2	43.84	0.62	184	33	43.84	0.62	1.70404
Pak1_2.FIN2	300.7	0.7963	0.0453	0.0015	0.00688	0.00011	0.18408	44.9	1.5	44.17	0.69	186	32	44.17	0.69	1.62584
Pak1_3.FIN2	289.6	0.7926	0.0471	0.0014	0.00699	0.0001	0.035673	46.7	1.4	44.91	0.67	204	31	44.91	0.67	3.83298
Pak1_4.FIN2	302.4	0.831	0.044	0.0012	0.0067	0.0001	0.13763	43.7	1.2	43.03	0.65	197	32	43.03	0.65	1.53318
Pak1_5.FIN2	311.4	0.7834	0.0455	0.0011	0.006986	9.7e-05	0.12222	45.1	1.1	44.88	0.62	158	25	44.88	0.62	0.487805
Pak1_6.FIN2	312.1	0.8049	0.045	0.0012	0.00684	0.00011	0.24591	44.6	1.1	43.97	0.7	154	32	43.97	0.7	1.41256
Pak1_7.FIN2	310.2	0.849	0.0442	0.0012	0.006767	9.4e-05	0.036326	43.9	1.2	43.47	0.6	160	33	43.47	0.6	0.979499
Pak1_8.FIN2	298.9	0.872	0.0426	0.0013	0.006733	9.6e-05	0.016019	42.3	1.3	43.26	0.62	169	32	43.26	0.62	2.2695
Pak1_9.FIN2	290	0.8646	0.0453	0.0013	0.00703	0.0001	0.17274	45	1.3	45.16	0.65	172	34	45.16	0.65	0.355556
PAK1_1.FIN2	393.8	0.88	0.0429	0.0012	0.00656	0.0001	0.10795	42.7	1.2	42.14	0.67	229	37	42.14	0.67	1.31148
PAK1_2.FIN2	378.9	0.874	0.0416	0.0013	0.00649	0.00012	0.1683	41.4	1.2	41.71	0.75	195	41	41.71	0.75	0.748792
PAK1_3.FIN2	399	0.881	0.0416	0.0015	0.00648	0.00012	0.17435	41.4	1.5	41.62	0.78	202	39	41.62	0.78	0.531401
PAK1_4.FIN2	411	0.882	0.0424	0.0016	0.00657	0.00012	0.0059084	42.2	1.6	42.2	0.78	187	47	42.2	0.78	0
PAK1_5.FIN2	397	0.872	0.0432	0.0019	0.00653	0.00012	0.25882	42.9	1.9	41.93	0.77	259	53	41.93	0.77	2.26107
PAK1_6.FIN2	434	0.872	0.0417	0.0017	0.00633	0.00014	0.025295	41.4	1.6	40.67	0.88	253	50	40.67	0.88	1.76329
PAK1_7.FIN2	417	0.879	0.043	0.0021	0.00659	0.00015	0.12151	42.7	2.1	42.32	0.97	263	57	42.32	0.97	0.88993
PAK1_8.FIN2	403.1	0.898	0.0406	0.0022	0.00647	0.00017	0.25436	40.4	2.1	41.6	1.1	241	63	41.6	1.1	2.9703
PAK1_9.FIN2	402	0.886	0.0414	0.002	0.00653	0.00023	0.010847	41.2	2	41.9	1.5	235	52	41.9	1.5	1.69903
PAK1_10.FIN2	371	0.872	0.0426	0.0025	0.00635	0.00021	0.36527	42.3	2.5	40.8	1.3	254	58	40.8	1.3	3.5461
PAK1_11.FIN2	364.7	0.864	0.0423	0.0022	0.00631	0.0002	0.2038	42	2.1	40.6	1.3	325	69	40.6	1.3	3.33333
PAK1_12.FIN2	292.8	0.9342	0.0399	0.0021	0.00644	0.00022	0.080704	39.7	2	41.4	1.4	341	63	41.4	1.4	4.28212
Pak1_1.FIN2	133.9	1.439	0.0466	0.0029	0.00672	0.00017	0.13303	46.1	2.8	43.2	1.1	160	120	43.2	1.1	6.29067
Pak1_2.FIN2	132.3	1.463	0.0447	0.003	0.00682	0.00018	0.033803	44.3	2.9	43.8	1.2	120	130	43.8	1.2	1.12867
Pak1_3.FIN2	389	1.294	0.0428	0.0019	0.00668	0.00014	0.053571	42.5	1.9	42.94	0.87	49	87	42.94	0.87	1.03529
Pak1_4.FIN2	412	1.179	0.0453	0.0016	0.00709	0.00015	0.36098	45	1.6	45.51	0.94	51	66	45.51	0.94	1.13333
Pak1_5.FIN2	428	1.184	0.0474	0.0022	0.00709	0.00015	0.24758	46.9	2.1	45.52	0.96	145	90	45.52	0.96	2.94243
Pak1_6.FIN2	435	1.222	0.0458	0.0018	0.00698	0.00014	0.31167	45.5	1.8	44.82	0.88	100	75	44.82	0.88	1.49451
Pak1_7.FIN2	316.9	1.338	0.0429	0.0019	0.00695	0.00016	0.079299	42.6	1.9	44.7	1	11	87	44.7	1	4.92958
Pak1_8.FIN2	220.9	1.462	0.0438	0.0026	0.00639	0.00016	0.10161	43.5	2.5	41.1	1	140	110	41.1	1	5.51724
Pak1_1.FIN2	263.2	1.379	0.0426	0.0023	0.00672	0.00019	0.31342	42.2	2.3	43.1	1.2	26	96	43.1	1.2	2.1327
Pak1_2.FIN2	190.1	1.476	0.0452	0.0025	0.00654	0.00015	0.16652	44.8	2.4	42.05	0.96	190	110	42.05	0.96	6.13839
Pak1_3.FIN2	142.2	1.407	0.0497	0.0033	0.00701	0.00018	0.0040349	49.1	3.1	45	1.2	250	130	45	1.2	8.35031
Pak1_4.FIN2	158.2	1.456	0.0432	0.0026	0.00699	0.0002	0.039447	42.9	2.5	44.9	1.3	0	110	44.9	1.3	4.662
Pak1_5.FIN2	221.6	1.457	0.0415	0.0024	0.00664	0.00016	0.24343	41.2	2.3	42.7	1	20	100	42.7	1	3.64078
Pak1_6.FIN2	160.1	1.551	0.0404	0.0025	0.00666	0.00018	0.13419	40.1	2.5	42.8	1.2	-40	110	42.8	1.2	6.73317
Pak1_7.FIN2	161.1	1.456	0.0467	0.0028	0.00668	0.00016	0.043739	46.2	2.7	42.9	1	210	120	42.9	1	7.14286
Pak1_8.FIN2	223.7	1.466	0.043	0.0025	0.00667	0.00015	0.10073	42.6	2.5	42.87	0.98	70	110	42.87	0.98	0.633803
Pak1_GSK_1.FIN2	277.5	1.411	0.0443	0.0023	0.0066	0.00013	0.11288	44	2.2	42.4	0.82	129	97	42.4	0.82	3.63636
Pak1_GSK_2.FIN2	310.2	1.394	0.0442	0.0023	0.00664	0.00013	0.063442	43.8	2.2	42.69	0.83	103	99	42.69	0.83	2.53425
Pak1_GSK_3.FIN2	300.8	1.393	0.0426	0.0022	0.00659	0.00012	0.004966	42.3	2.1	42.36	0.75	90	100	42.36	0.75	0.141844
Pak1_GSK_4.FIN2	267	1.426	0.0448	0.0024	0.00668	0.00012	0.12262	44.4	2.3	42.89	0.8	130	100	42.89	0.8	3.4009
Pak1_GSK_5.FIN2	291.6	1.427	0.042	0.0023	0.00669	0.00012	0.049825	41.7	2.3	42.95	0.8	30	110	42.95	0.8	2.9976
Pak1_GSK_6.FIN2	284.2	1.424	0.0431	0.0022	0.00669	0.00014	0.21291	42.8	2.2	42.99	0.87	59	93	42.99	0.87	0.443925
Pak1_GSK_7.FIN2	275.3	1.424	0.046	0.0022	0.00674	0.00012	0.02518	45.6	2.2	43.3	0.76	162	98	43.3	0.76	5.04386

## Sheet: Plesovice
Plesovice_1.FIN2	586	8.55	0.3916	0.0063	0.05284	0.0006	0.4942	335.2	4.6	331.9	3.7	331	33	331.9	3.7	0.984487
Plesovice_2.FIN2	619	8.66	0.3846	0.0059	0.05304	0.00048	0.40367	330.1	4.3	333.1	2.9	317	33	333.1	2.9	0.908816
Plesovice_3.FIN2	621	8.96	0.3915	0.0059	0.05284	0.00061	0.46839	335.1	4.3	331.9	3.7	353	32	331.9	3.7	0.954939
Plesovice_4.FIN2	638	8.11	0.3802	0.0057	0.05296	0.00053	0.38847	326.9	4.2	332.6	3.2	271	33	332.6	3.2	1.74365
Plesovice_5.FIN2	696	8.3	0.3957	0.0062	0.05409	0.00061	0.577	338.2	4.4	339.6	3.8	339	30	339.6	3.8	0.413956
Plesovice_6.FIN2	728	8.42	0.3943	0.0059	0.05405	0.00056	0.51004	337.2	4.3	339.3	3.4	306	30	339.3	3.4	0.622776
Plesovice_7.FIN2	726	8.51	0.395	0.0059	0.05408	0.00053	0.41945	337.7	4.3	339.5	3.3	346	32	339.5	3.3	0.533017
Plesovice_8.FIN2	631	8.54	0.3848	0.005	0.05169	0.0005	0.49199	330.8	3.7	324.9	3.1	344	28	324.9	3.1	1.78356
Plesovice_1.FIN2	871	7.079	0.4015	0.005	0.05417	0.00052	0.20433	342.5	3.6	340	3.2	339	28	340	3.2	0.729927
Plesovice_2.FIN2	690	7.505	0.4025	0.0046	0.05457	0.00046	0.25253	343.3	3.3	342.8	2.7	348	28	342.8	2.7	0.145645
Plesovice_3.FIN2	600	8.76	0.3942	0.0051	0.05369	0.00058	0.31756	337.2	3.7	337.1	3.5	340	31	337.1	3.5	0.029656
Plesovice_4.FIN2	534	8.98	0.399	0.0056	0.05346	0.00053	0.26795	340.6	4	335.7	3.3	370	33	335.7	3.3	1.43864
Plesovice_5.FIN2	561	8.5	0.3905	0.0061	0.05467	0.00062	0.49193	334.4	4.4	343.1	3.8	273	31	343.1	3.8	2.60167
Plesovice_6.FIN2	798	7.67	0.396	0.0054	0.05268	0.00047	0.3564	338.4	3.9	330.9	2.9	381	31	330.9	2.9	2.21631
Plesovice_7.FIN2	852	7.17	0.3842	0.0049	0.05389	0.00065	0.51365	329.8	3.6	338.3	4	283	27	338.3	4	2.57732
Plesovice_8.FIN2	894	6.82	0.3949	0.005	0.0549	0.00059	0.51623	337.7	3.6	344.5	3.6	296	27	344.5	3.6	2.01362
Plesovice1_1.FIN2	419.4	7.55	0.4022	0.0059	0.05426	0.00045	0.33314	342.9	4.2	340.6	2.8	341	32	340.6	2.8	0.670749
Plesovice1_2.FIN2	432.8	7.49	0.405	0.0062	0.05429	0.00041	0.18252	344.9	4.5	340.8	2.5	353	35	340.8	2.5	1.18875
Plesovice1_3.FIN2	442	7.68	0.4009	0.0061	0.0547	0.00041	0.1811	341.9	4.4	343.3	2.5	330	35	343.3	2.5	0.409476
Plesovice1_4.FIN2	479	7.55	0.4043	0.0059	0.05517	0.00038	0.17032	345	4.2	346.5	2.3	339	34	346.5	2.3	0.434783
Plesovice1_5.FIN2	472	7.32	0.4033	0.0058	0.05532	0.0004	0.16919	343.7	4.2	347.1	2.4	308	34	347.1	2.4	0.989235
Plesovice1_6.FIN2	403.7	7.64	0.4057	0.0065	0.05553	0.0004	0.25284	345.3	4.7	348.4	2.4	312	36	348.4	2.4	0.89777
Plesovice1_7.FIN2	420	6.54	0.4071	0.0062	0.05627	0.00043	0.36054	346.4	4.5	352.9	2.6	307	33	352.9	2.6	1.87644
Plesovice1_8.FIN2	462	6.56	0.4108	0.0055	0.05568	0.00043	0.14585	349.1	3.9	349.3	2.6	337	32	349.3	2.6	0.0572902
Plesovice1_9.FIN2	478	6.897	0.4086	0.0055	0.05588	0.00037	0.20642	347.6	4	350.5	2.3	316	31	350.5	2.3	0.834292
Plesovice1_10.FIN2	484	6.96	0.3943	0.0059	0.05431	0.00036	0.13897	337.7	4.2	340.9	2.2	294	35	340.9	2.2	0.947587
Plesovice1_11.FIN2	497	6.844	0.4	0.0058	0.05424	0.00038	0.29433	341.3	4.2	340.5	2.3	334	32	340.5	2.3	0.234398
Plesovice_GSK_1.FIN2	803	7.088	0.3935	0.0052	0.05331	0.00039	0.50113	337.2	3.7	334.8	2.4	347	28	334.8	2.4	0.711744
Plesovice_GSK_2.FIN2	755	7.28	0.3956	0.0053	0.05372	0.00046	0.45105	338.2	3.8	337.3	2.8	342	28	337.3	2.8	0.266115
Plesovice_GSK_3.FIN2	738	6.97	0.4081	0.0057	0.05368	0.00041	0.34203	347.2	4.1	337.1	2.5	405	30	337.1	2.5	2.90899
Plesovice_GSK_4.FIN2	746	7.33	0.4007	0.0057	0.05421	0.00043	0.43143	341.9	4.1	340.3	2.6	350	29	340.3	2.6	0.467973
Plesovice_GSK_5.FIN2	746	7.19	0.4066	0.0054	0.05454	0.00043	0.25831	346.1	3.9	342.3	2.6	367	30	342.3	2.6	1.09795
Plesovice_GSK_6.FIN2	786	6.923	0.4067	0.0062	0.05385	0.00043	0.26082	346.7	4.5	338.1	2.6	387	33	338.1	2.6	2.48053
Plesovice_GSK_7.FIN2	763	6.921	0.4187	0.0063	0.05468	0.00041	0.22277	354.8	4.5	343.1	2.5	413	33	343.1	2.5	3.29763
Plesovice_GSK_8.FIN2	747	6.506	0.4471	0.0085	0.05532	0.00039	0.16278	376.2	6.2	347.1	2.4	552	43	347.1	2.4	7.73525
Plesovice_GSK_9.FIN2	751	7.66	0.3996	0.0053	0.05443	0.00041	0.41748	341.1	3.9	341.6	2.5	342	28	341.6	2.5	0.146585
Plesovice_GSK_10.FIN2	712	8.19	0.4019	0.0056	0.05507	0.0004	0.28076	343.2	4	345.6	2.5	321	31	345.6	2.5	0.699301
Plesovice1_1.FIN2	522	7.12	0.3927	0.0054	0.05401	0.00038	0.16772	336.1	3.9	339.1	2.3	324	32	339.1	2.3	0.892591
Plesovice1_2.FIN2	523	7.13	0.3969	0.006	0.05477	0.00039	0.25977	339.6	4.5	343.7	2.4	338	34	343.7	2.4	1.2073
Plesovice1_3.FIN2	534	7.3	0.4021	0.0058	0.05358	0.00045	0.4191	342.8	4.2	336.4	2.8	377	30	336.4	2.8	1.86698
Plesovice1_4.FIN2	440	7.54	0.405	0.0058	0.05325	0.00039	0.23473	344.9	4.2	334.5	2.4	368	34	334.5	2.4	3.01537
Plesovice1_5.FIN2	552	7.43	0.3978	0.0058	0.05359	0.00034	0.30331	340.3	4.3	336.5	2.1	379	32	336.5	2.1	1.11666
Plesovice1_6.FIN2	514	7.055	0.3976	0.0054	0.0537	0.00033	0.11591	339.6	3.9	337.2	2	338	33	337.2	2	0.706714
Plesovice1_7.FIN2	504	6.331	0.389	0.0055	0.05323	0.0004	0.023967	333.4	4.1	334.3	2.5	327	36	334.3	2.5	0.269946
Plesovice1_8.FIN2	557	7.11	0.3934	0.0062	0.05354	0.00037	0.25414	336.5	4.5	336.2	2.3	307	34	336.2	2.3	0.089153
Plesovice1_9.FIN2	556	7.2	0.4042	0.0049	0.05329	0.00036	0.18974	344.4	3.5	334.7	2.2	344	28	334.7	2.2	2.81649
Plesovice1_10.FIN2	555	7.26	0.4136	0.0057	0.05441	0.00036	0.14369	351.1	4.1	341.5	2.2	354	32	341.5	2.2	2.73426
Plesovice1_11.FIN2	590	7.286	0.3956	0.0054	0.05349	0.00031	0.28532	338.2	3.9	335.9	1.9	331	30	335.9	1.9	0.680071
Plesovice1_12.FIN2	454	7.03	0.404	0.0058	0.05363	0.00043	0.2717	344.2	4.2	336.7	2.6	388	32	336.7	2.6	2.17897

## Sheet: 91500b
91500b_2.FIN2	87.2	1.907	1.802	0.038	0.1755	0.0023	0.45522	1044	14	1042	13	1057	39	1057	39	1.41911
91500b_3.FIN2	84.4	1.892	1.845	0.036	0.1764	0.0021	0.27777	1060	13	1047	11	1076	41	1076	41	2.69517
91500b_4.FIN2	82.9	1.912	1.827	0.029	0.1791	0.0019	0.23271	1053	10	1062	10	1023	34	1023	34	3.81232
91500b_5.FIN2	82.8	1.806	1.848	0.033	0.1803	0.002	0.44888	1060	12	1068	11	1041	32	1041	32	2.59366
91500b_6.FIN2	82.6	1.853	1.858	0.032	0.1822	0.0018	0.32344	1064	11	1078.6	9.7	1024	33	1024	33	5.33203
91500b_7.FIN2	79.8	1.83	1.891	0.034	0.1811	0.0019	0.28777	1075	12	1072	10	1069	36	1069	36	0.280636
91500b_2.FIN2	85.9	1.959	1.751	0.034	0.1715	0.0029	0.53057	1029	13	1020	16	1026	38	1026	38	0.584795
91500b_3.FIN2	84.7	1.914	1.715	0.035	0.1712	0.0024	0.40457	1013	13	1018	13	1002	41	1002	41	1.59681
91500b_4.FIN2	78.8	1.815	1.758	0.033	0.1738	0.0021	0.42798	1027	12	1033	12	1005	35	1005	35	2.78607
91500b_5.FIN2	78.7	1.876	1.791	0.036	0.1731	0.0023	0.34303	1039	13	1029	13	1060	39	1060	39	2.92453
91500b_6.FIN2	74	1.859	1.855	0.033	0.1746	0.0022	0.30545	1062	12	1037	12	1077	36	1077	36	3.71402
91500b_7.FIN2	78.3	1.857	1.858	0.035	0.1737	0.0024	0.3552	1063	13	1032	13	1085	39	1085	39	4.88479
91500b_8.FIN2	78.9	1.976	1.825	0.038	0.1745	0.0029	0.52937	1053	14	1036	16	1063	39	1063	39	2.53998
