# Supplementary material
Source: publisher figshare collection journal article supplement (https://gsapubs.figshare.com/ndownloader/files/22412031)

## TSS1

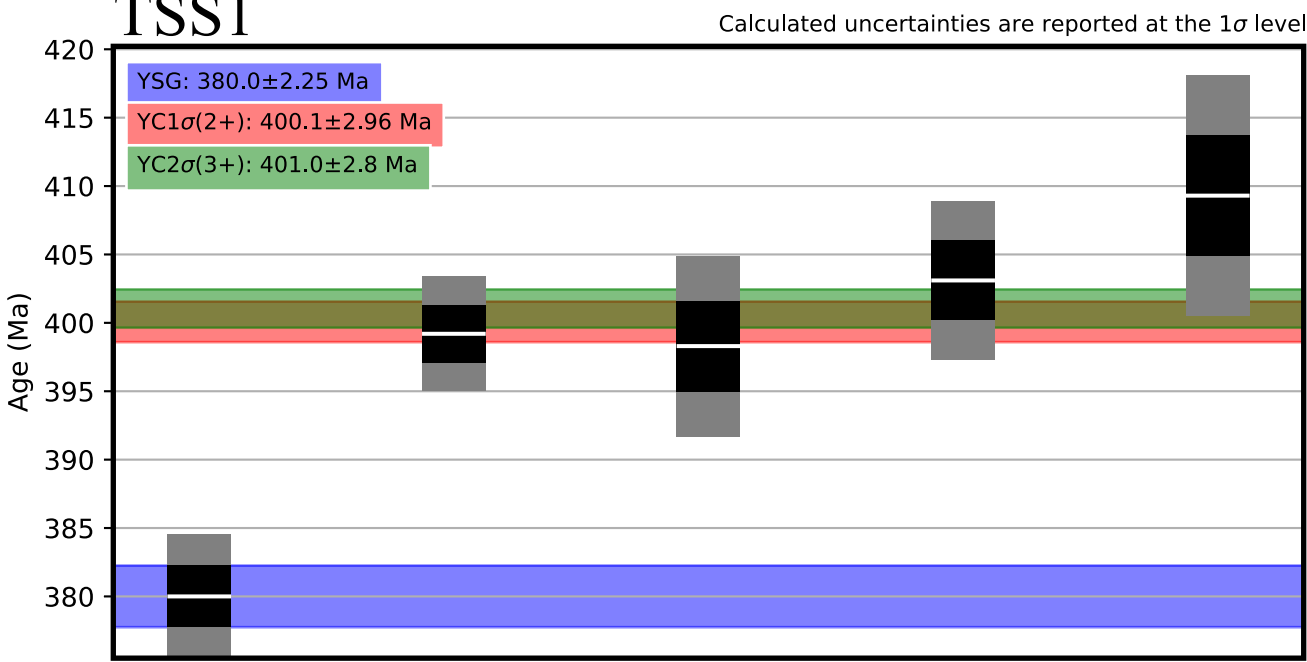

## HF1

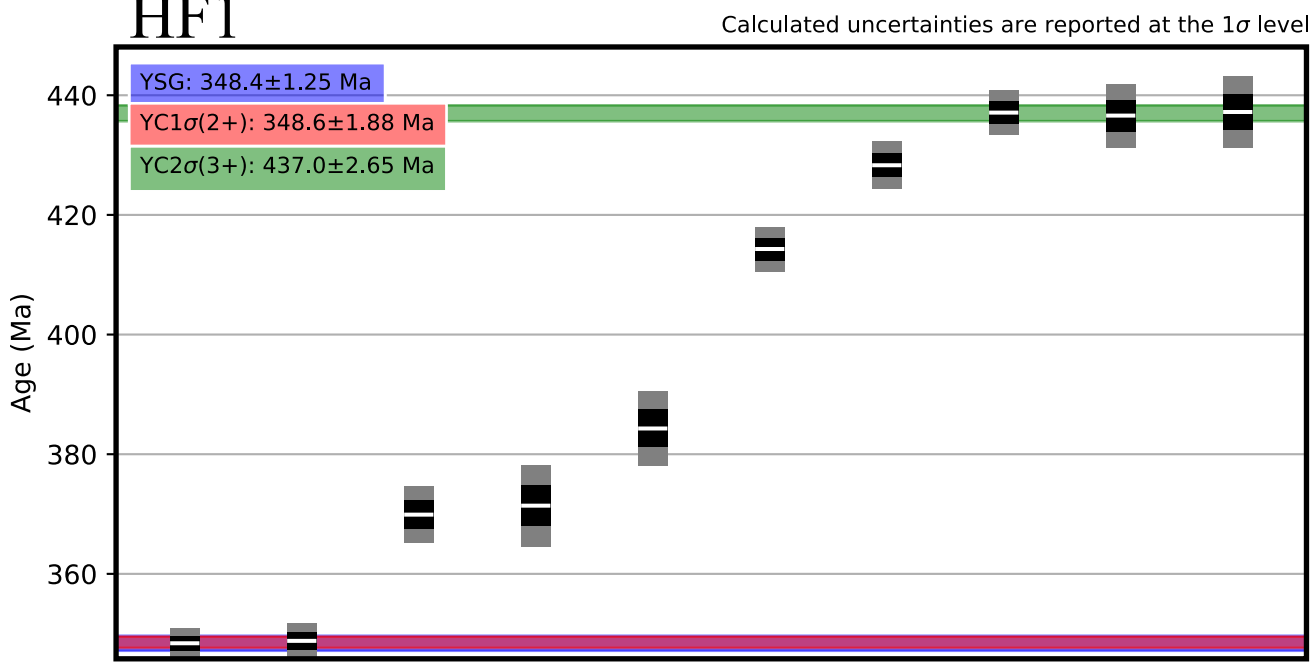

## TSS2

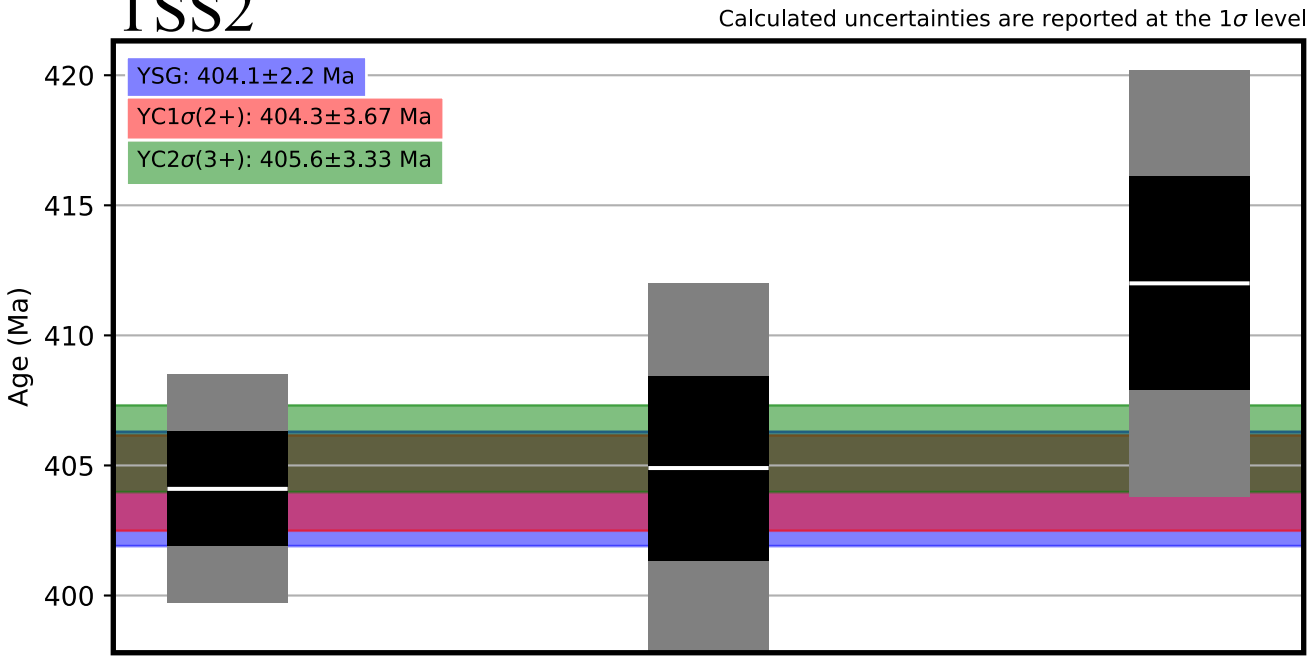

## HF2

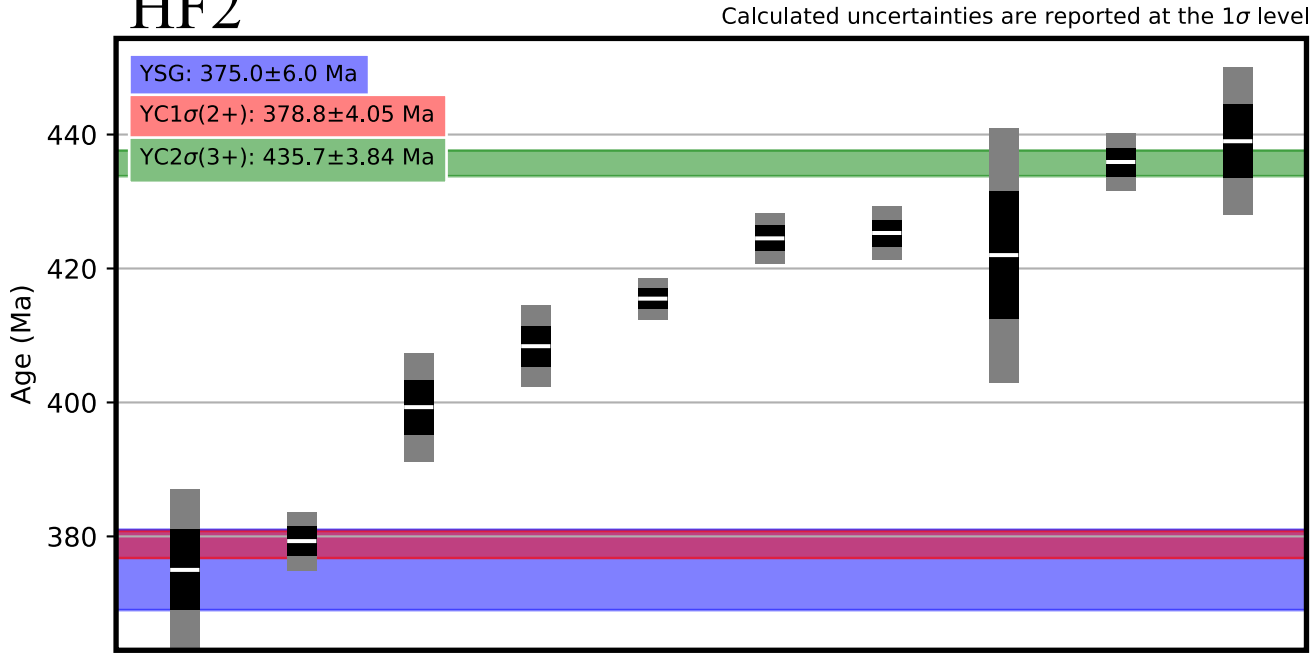

## WCSS1

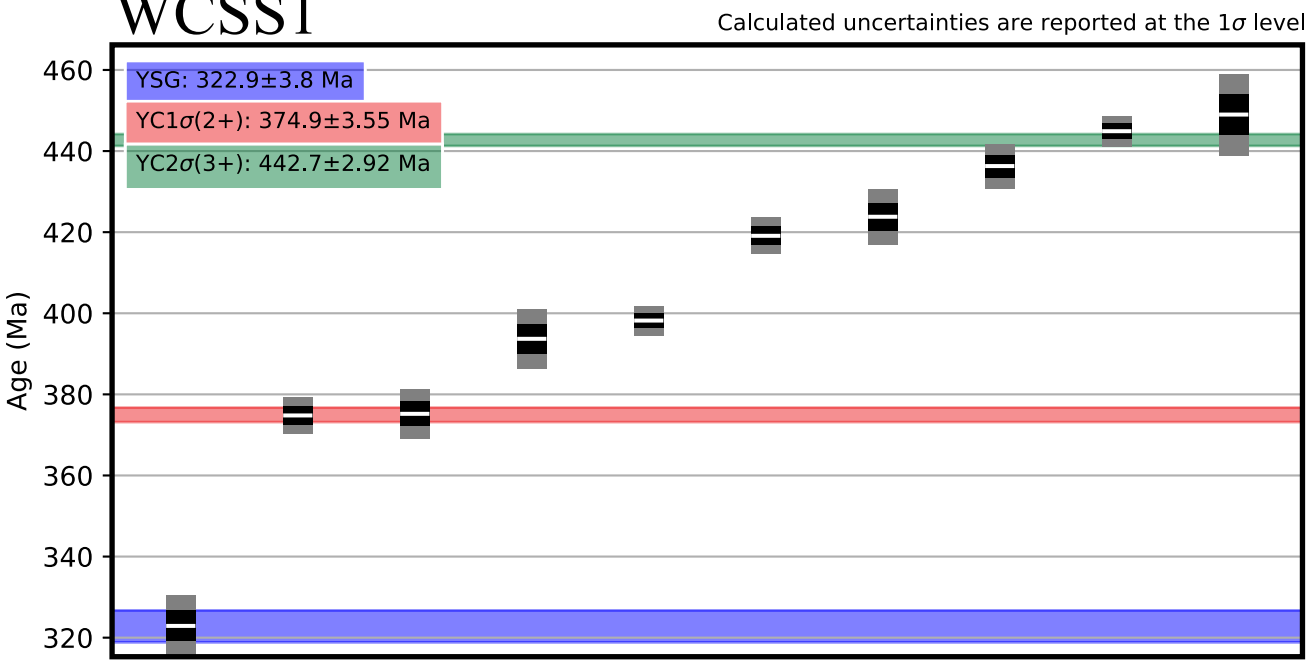

## LSS1

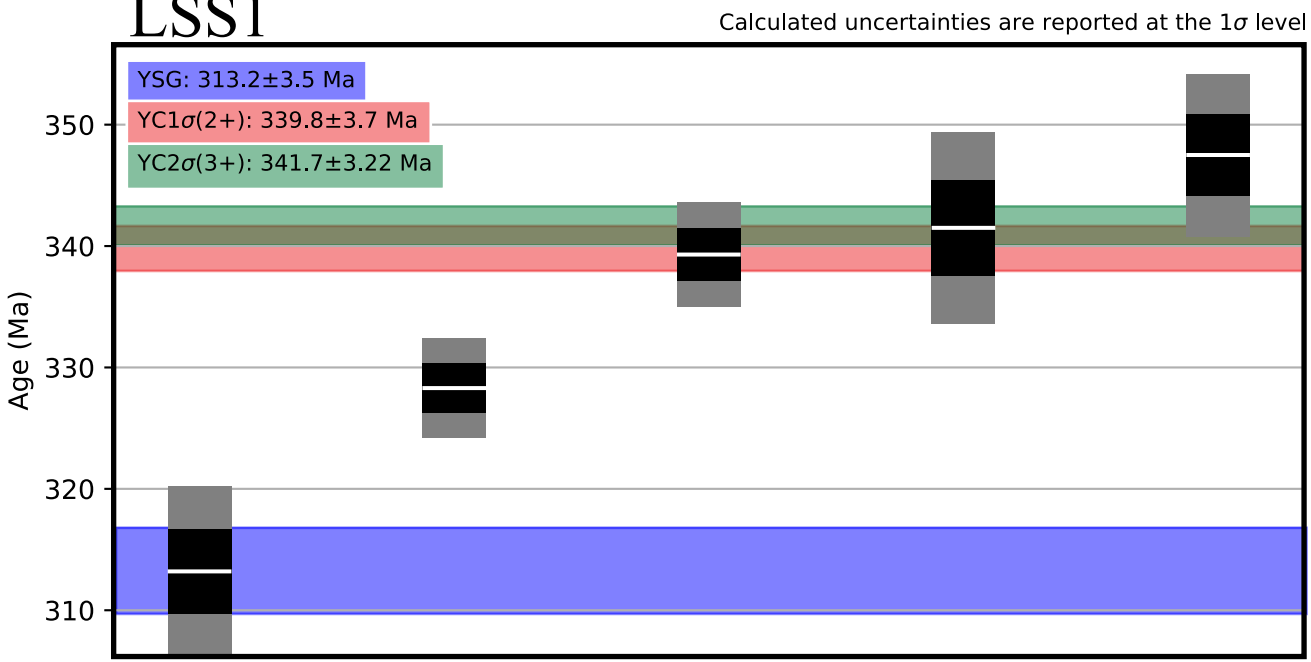

## WCSS2

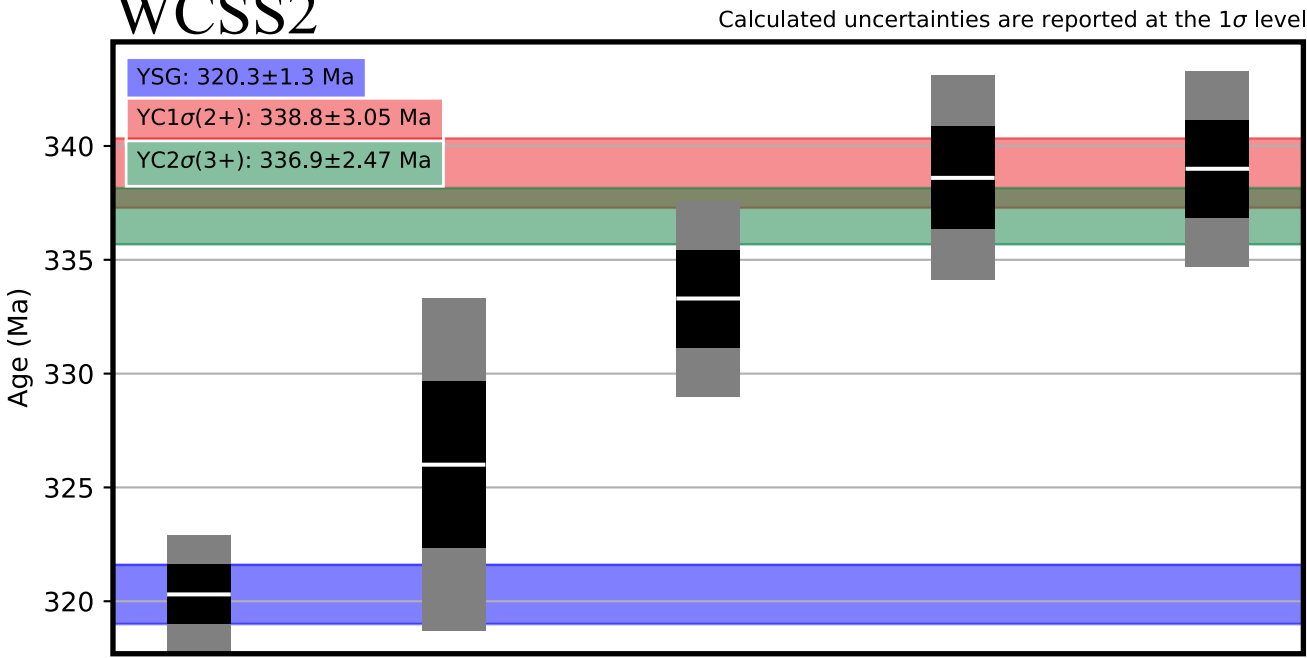

## WSS5

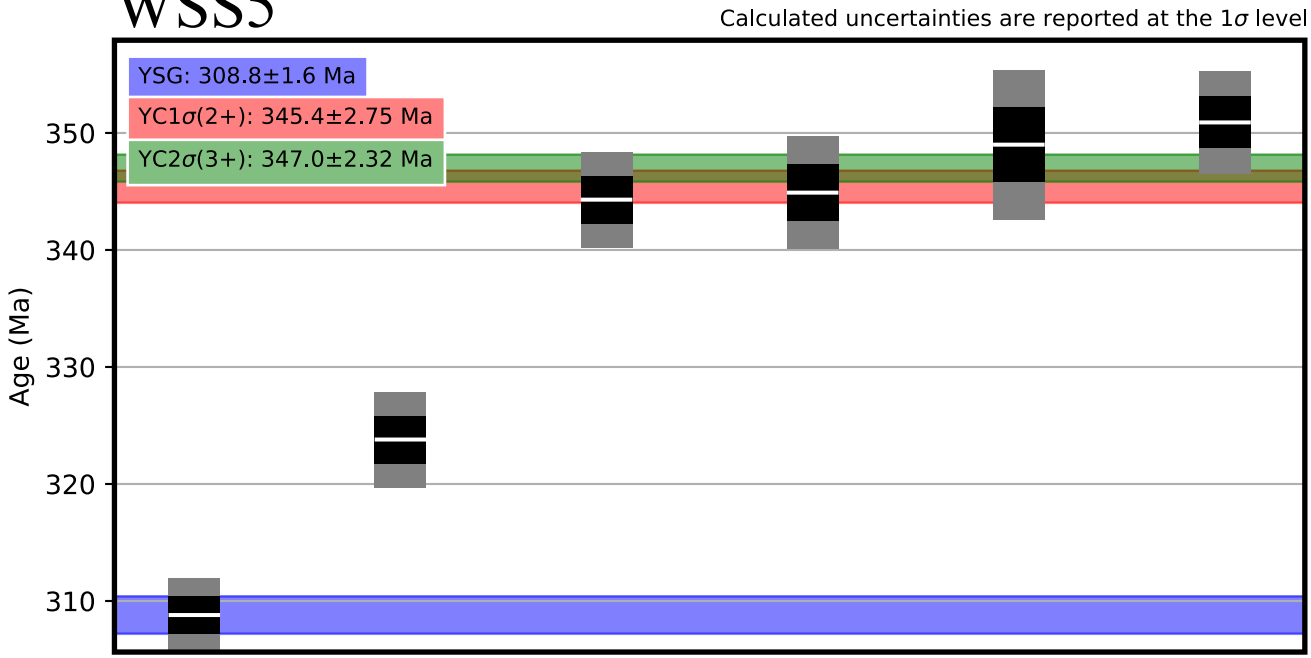

# VSS1

Calculated uncertainties are reported at the 1σ level

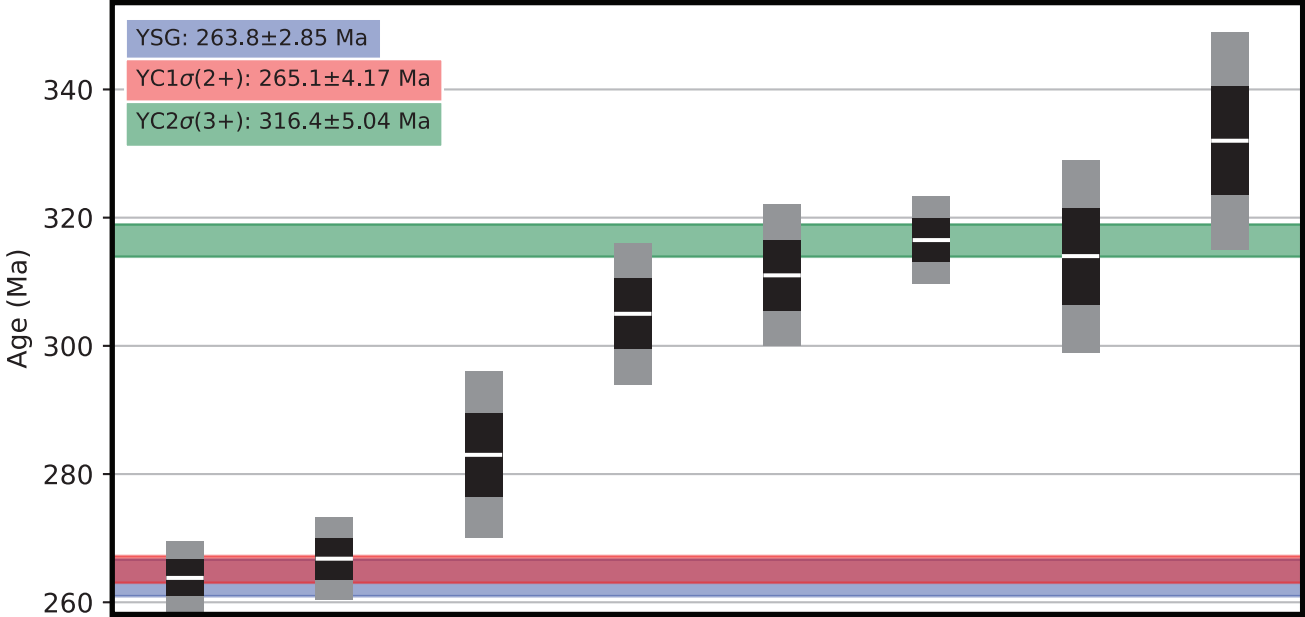

# VSS3

Calculated uncertainties are reported at the 1σ level

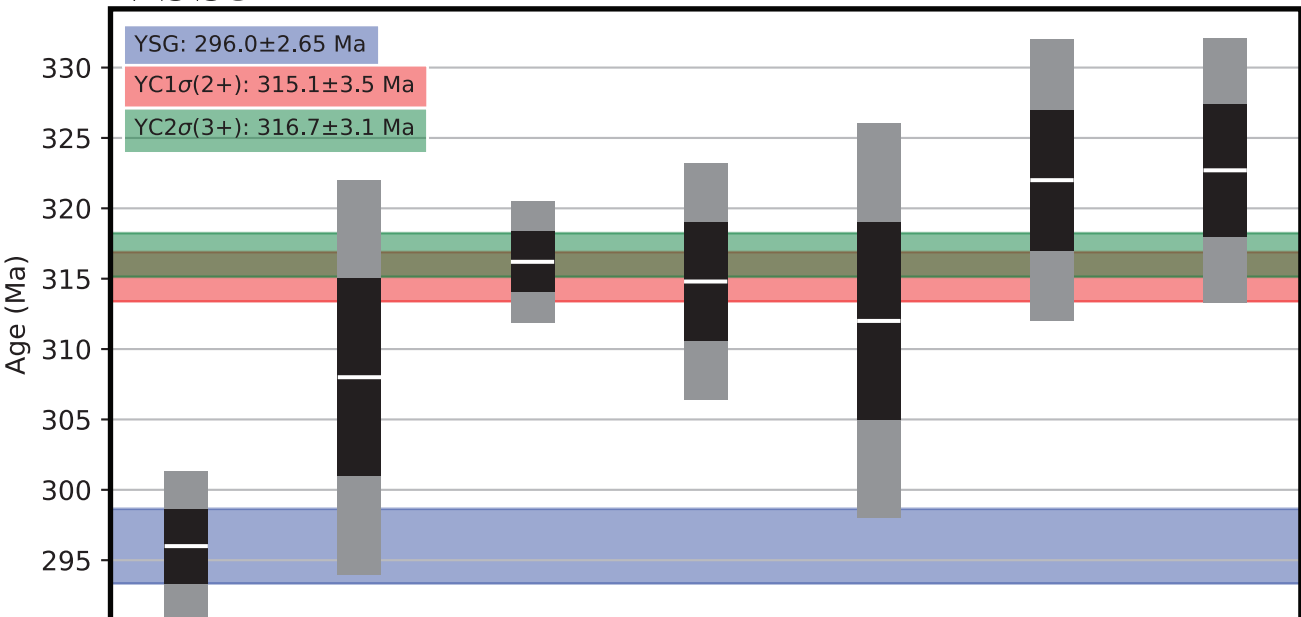

# VSS2

Calculated uncertainties are reported at the 1σ level

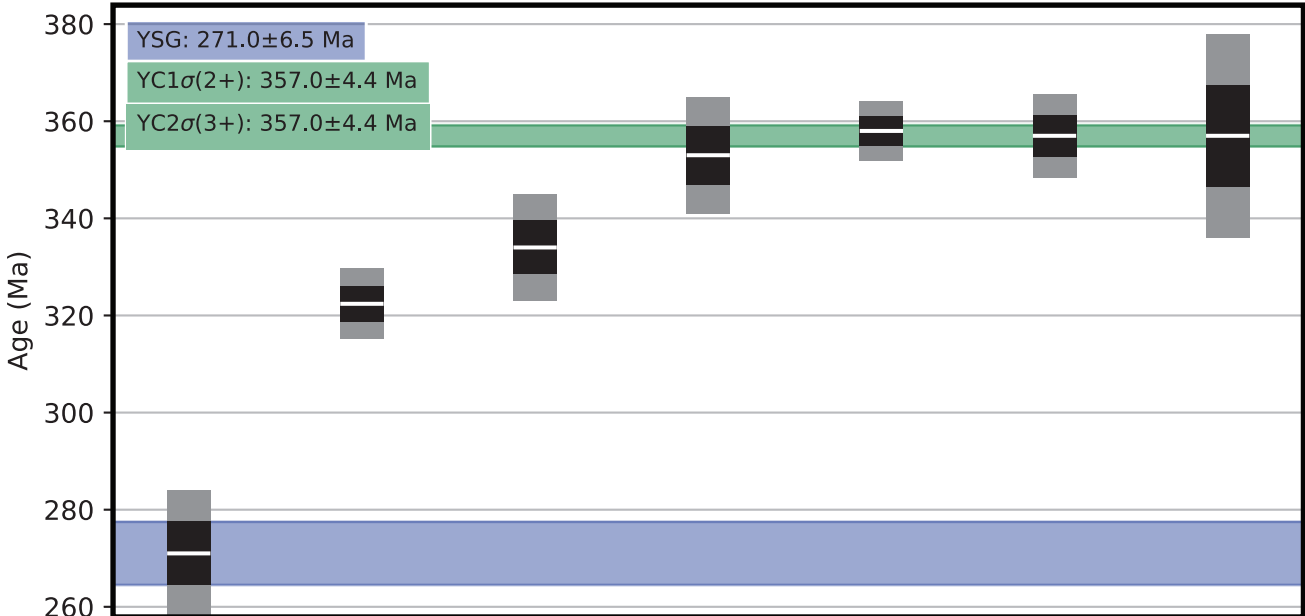

# VSS4

Calculated uncertainties are reported at the 1σ level

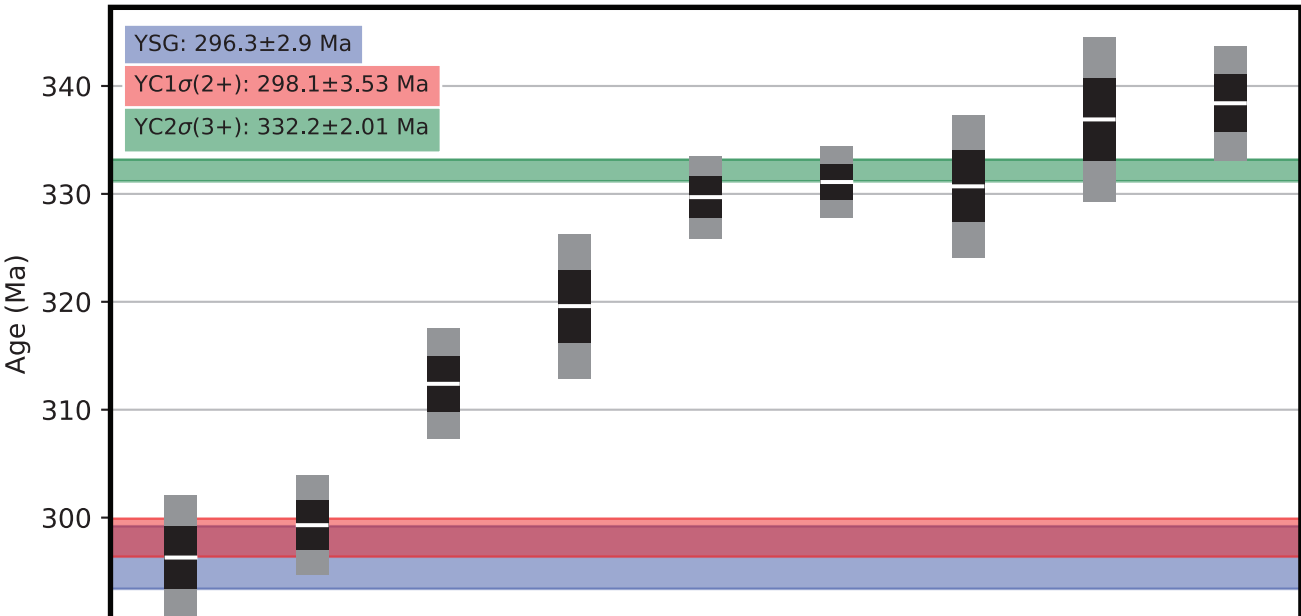

# ALSS1

Calculated uncertainties are reported at the 1σ level

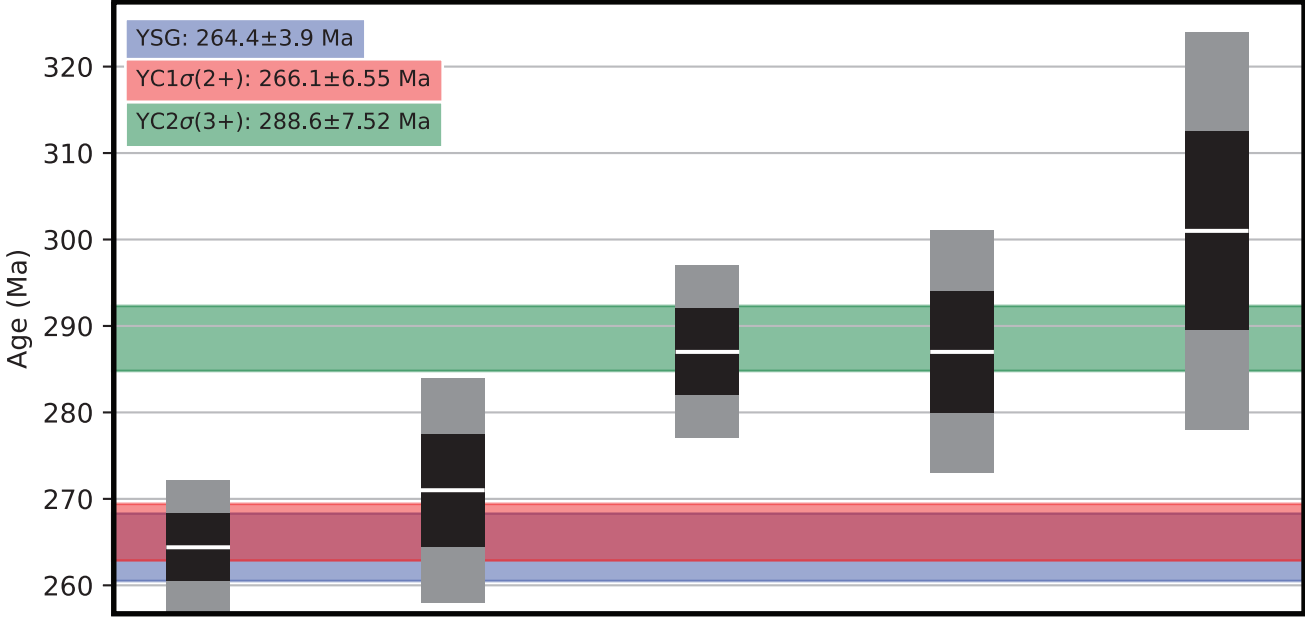

Supplement: Supplementary file 1 [file 22412031 › GS2108_SuppFileS2.pdf]
