# Supplementary material
Source: publisher figshare collection journal article supplement (https://gsapubs.figshare.com/ndownloader/files/22412031)
Supplement: Supplementary file 1 [file 22412031 › GS2108_SuppFileS3.xlsx]

## Sheet: Table S1 TSS1 and TSS2
Soto-Kerans, G., Stockli, D., Janson, X., Lawton, T.F., and Covault, J.A., 2019, Orogen proximal sedimentation in the Permian foreland basin: Geosphere, v. 15, https://doi.org/10.1130/GES02108.1.
Supplemental File S3
Table S1
Sample Name:								207/235		206/238		206/207		Best age
Grain #	[U] ppm	U/Th	207/235	2σ error	206/238	2σ error	RHO	Age Ma	2σ error	Age (Ma)	2σ error	Age (Ma)	2σ error	(Ma)	2σ error	% Discordance*
TSS1_1.FIN2	316	1.79	1.764	0.021	0.1743	0.0016	0.42524	1032.3	7.7	1035.9	9	1034	17	1034	17	0.183752
TSS1_2.FIN2	21.79	0.871	13.22	0.2	0.4992	0.0091	0.21151	2695	15	2609	39	2754	22	2754	22	5.26507
TSS1_3.FIN2	221.5	1.545	4.894	0.056	0.3203	0.0043	0.55663	1800.9	9.7	1791	21	1803	12	1803	12	0.665557
TSS1_4.FIN2	122.9	1.412	2.607	0.061	0.2144	0.0049	0.77241	1306	18	1252	26	1434	14	1434	14	12.6918
TSS1_5.FIN2	34.5	0.756	1.584	0.058	0.1569	0.0044	0.40621	963	23	939	25	1038	21	1038	21	9.53757
TSS1_6.FIN2	86.6	0.686	0.549	0.013	0.071	0.001	0.12401	445	8.4	442.4	6.1	456	36	442.4	6.1	0.58427
TSS1_7.FIN2	245.5	1.294	2.121	0.026	0.1942	0.0023	0.098007	1155.3	8.3	1144	13	1181	14	1181	14	3.13294
TSS1_8.FIN2	8.9	1.357	5.58	0.2	0.346	0.013	0.14965	1911	30	1912	65	1907	45	1907	45	0.262192
TSS1_9.FIN2	173	1.716	1.642	0.031	0.1603	0.0026	0.6622	986	12	959	15	1061	16	1061	16	9.61357
TSS1_10.FIN2	123.4	1.308	3.014	0.054	0.2302	0.0033	0.53486	1411	14	1335	17	1525	13	1525	13	12.459
TSS1_11.FIN2	41.2	1.331	2.47	0.1	0.1575	0.0053	0.37654	1261	31	943	30	1854	32	1854	32	49.137
TSS1_11.FIN2	44.2	1.57	5.22	0.42	0.275	0.024	0.9089	1850	70	1560	120	2198	39	2198	39	29.0264
TSS1_12.FIN2	27	1.491	1.901	0.075	0.1829	0.0044	0.24763	1079	26	1083	24	1096	44	1096	44	1.18613
TSS1_13.FIN2	59.1	1.207	0.541	0.019	0.0684	0.0011	0.067362	442	12	426.6	6.6	541	63	426.6	6.6	3.48416
TSS1_14.FIN2	288	2.522	1.843	0.028	0.1802	0.0023	0.15461	1062.3	9.7	1068	13	1037	18	1037	18	2.98939
TSS1_15.FIN2	136.7	1.77	3.11	0.061	0.2454	0.004	0.60793	1435	15	1414	21	1459	15	1459	15	3.0843
TSS1_16.FIN2	99.72	1.332	0.512	0.011	0.0677	0.00091	0.13066	419	7.3	422.3	5.5	418	30	422.3	5.5	0.787589
TSS1_17.FIN2	77.8	1.922	1.834	0.039	0.1798	0.0054	0.046803	1057	14	1066	30	1048	39	1048	39	1.71756
TSS1_18.FIN2	265	5.45	1.719	0.026	0.1701	0.0031	0.91053	1015.3	9.5	1013	17	1022	10	1022	10	0.880626
TSS1_19.FIN2	27.9	0.634	1.092	0.068	0.0675	0.0025	0.40974	743	32	421	15	1931	73	DISC	DISC	78.1978
TSS1_20.FIN2	64.7	2.24	1.909	0.048	0.189	0.0037	0.50378	1083	17	1116	20	1032	13	1032	13	8.13953
TSS1_21.FIN2	147	0.5868	4.095	0.07	0.2883	0.0043	0.42065	1653	14	1633	21	1674	11	1674	11	2.44922
TSS1_22.FIN2	51.28	1.059	4.161	0.073	0.2931	0.0035	0.30572	1665	14	1657	18	1678	14	1678	14	1.25149
TSS1_23.FIN2	84.2	3.228	4.702	0.08	0.3153	0.006	0.65772	1771	13	1766	29	1788	13	1788	13	1.23043
TSS1_24.FIN2	129.2	1.67	2.447	0.059	0.197	0.0048	0.60388	1256	17	1159	26	1441	19	1441	19	19.5697
TSS1_25.FIN2	110.4	0.519	1.692	0.044	0.1661	0.0033	0.58636	1005	16	990	18	1047	19	1047	19	5.44413
TSS1_27.FIN2	37.1	0.6995	0.502	0.018	0.0656	0.0015	0.056621	412	12	409.3	8.8	442	52	409.3	8.8	0.65534
TSS1_28.FIN2	95.6	0.927	2.541	0.033	0.2178	0.0031	0.36927	1283.3	9.4	1270	16	1316	15	1316	15	3.49544
TSS1_29.FIN2	187.6	2.21	3.853	0.039	0.2797	0.003	0.57029	1604.9	8	1590	15	1622	10	1622	10	1.97287
TSS1_30.FIN2	117.9	0.893	4.096	0.055	0.288	0.003	0.56686	1655	11	1632	15	1680	13	1680	13	2.85714
TSS1_31.FIN2	215	1.099	0.4478	0.0064	0.06073	0.00074	0.21168	375.6	4.5	380	4.5	346	25	380	4.5	1.17146
TSS1_32.FIN2	111.9	2.05	4.871	0.048	0.3267	0.0034	0.50164	1797.9	8.1	1822	16	1769.3	9.6	1769.3	9.6	2.97858
TSS1_33.FIN2	95.5	3.65	2.397	0.049	0.2117	0.0037	0.7142	1244	14	1237	20	1238	14	1238	14	0.0807754
TSS1_34.FIN2	149.7	1.878	2.753	0.04	0.2265	0.0031	0.13446	1342	11	1316	16	1387	28	1387	28	5.11896
TSS1_35.FIN2	276	1.577	2.037	0.021	0.1915	0.0015	0.63714	1127.6	7	1130.9	8.6	1129	11	1129	11	0.168291
TSS1_36.FIN2	57.4	1.12	1.948	0.044	0.1821	0.0032	0.22057	1097	15	1078	18	1124	28	1124	28	4.09253
TSS1_37.FIN2	126	1.375	17.95	0.14	0.5839	0.005	0.6435	2987.9	7.7	2964	20	2995.1	6	2995.1	6	1.03836
TSS1_38.FIN2	50.7	2.514	1.526	0.079	0.1561	0.0047	0.43194	939	32	935	26	973	28	973	28	3.90545
TSS1_39.FIN2	51.1	1.6	1.888	0.044	0.1808	0.0031	0.47107	1077	15	1071	17	1080	17	1080	17	0.833333
TSS1_40.FIN2	255.3	2.039	6.104	0.08	0.3577	0.0034	0.76767	1992	11	1971	16	2017.9	9.6	2017.9	9.6	2.3242
TSS1_41.FIN2	186	1.757	4.263	0.039	0.299	0.0028	0.53926	1687.1	7.9	1686	14	1696.2	9.1	1696.2	9.1	0.601344
TSS1_42.FIN2	31.4	0.731	1.793	0.072	0.1811	0.0055	0.14681	1041	27	1080	32	957	38	957	38	12.8527
TSS1_43.FIN2	135.1	0.786	4.919	0.055	0.3221	0.0032	0.45493	1804.9	9.5	1800	16	1800.5	9	1800.5	9	0.0277701
TSS1_44.FIN2	6.29	1.123	1.72	0.11	0.1617	0.0069	0.26602	1025	39	965	38	1145	72	1145	72	15.7205
TSS1_45.FIN2	258	2.463	1.898	0.019	0.1828	0.0017	0.37124	1080.1	6.7	1082.2	9.2	1089.2	9.3	1089.2	9.3	0.642674
TSS1_46.FIN2	26.82	0.532	2.023	0.056	0.1868	0.0031	0.21781	1126	18	1104	17	1170	31	1170	31	5.64103
TSS1_47.FIN2	161.2	2.072	2.093	0.021	0.1935	0.0016	0.25477	1146.3	6.8	1140	8.8	1155	11	1155	11	1.2987
TSS1_48.FIN2	95.7	3.32	1.654	0.047	0.1608	0.0024	0.32965	990	18	961	13	1052	22	1052	22	8.65019
TSS1_49.FIN2	57.58	0.882	1.891	0.041	0.1729	0.0047	0.16372	1078	14	1028	26	1157	27	1157	27	11.1495
TSS1_50.FIN2	52	0.1887	0.856	0.041	0.0847	0.0042	0.60527	629	23	528	26	1008	56	DISC	DISC	47.619
TSS1_51.FIN2	69.9	1.411	2.047	0.045	0.1906	0.0048	0.73211	1131	15	1125	26	1137	21	1137	21	1.05541
TSS1_52.FIN2	183	1.74	1.797	0.049	0.1725	0.0037	0.6187	1044	18	1025	20	1105	17	1105	17	7.23982
TSS1_53.FIN2	226.1	1.432	0.597	0.012	0.07639	0.00087	0.51474	474.5	7.8	474.5	5.2	492	19	474.5	5.2	0
TSS1_54.FIN2	102.8	0.969	4.74	0.082	0.3101	0.005	0.68854	1773	14	1741	24	1806	10	1806	10	3.59911
TSS1_55.FIN2	83.4	1.279	5.55	0.061	0.346	0.003	0.46024	1908.8	9.2	1915	14	1911.4	8.9	1911.4	8.9	0.188344
TSS1_56.FIN2	66.3	1.305	1.868	0.036	0.1794	0.0029	0.011901	1071	12	1064	16	1082	18	1082	18	1.66359
TSS1_57.FIN2	73	1.511	1.78	0.028	0.1727	0.0032	0.12972	1038	10	1027	17	1062	27	1062	27	3.29567
TSS1_58.FIN2	182.1	0.4572	1.818	0.024	0.1772	0.0024	0.30043	1051.9	8.8	1052	13	1027	12	1027	12	2.43427
TSS1_59.FIN2	50.7	3.78	3.987	0.063	0.287	0.0036	0.38974	1633	13	1626	18	1643	16	1643	16	1.03469
TSS1_61.FIN2	59.6	0.914	3.55	0.1	0.26	0.0079	0.77612	1544	25	1489	41	1639	21	1639	21	9.15192
TSS1_62.FIN2	42.8	0.898	2.807	0.065	0.24	0.0046	0.27361	1363	16	1387	24	1329	33	1329	33	4.36418
TSS1_63.FIN2	331	2.933	1.744	0.018	0.1714	0.0016	0.44469	1024.5	6.5	1020	9	1046	11	1046	11	2.48566
TSS1_64.FIN2	167.6	1.128	4.029	0.056	0.2903	0.0044	0.80288	1639	11	1642	22	1629	12	1629	12	0.798036
TSS1_65.FIN2	34.5	3.51	1.757	0.06	0.1705	0.0055	0.4612	1028	22	1014	30	1083	25	1083	25	6.37119
TSS1_66.FIN2	123.3	1.065	0.496	0.013	0.06453	0.00096	0.25159	408.7	8.6	403.1	5.8	442	30	403.1	5.8	1.3702
TSS1_67.FIN2	96.9	2.222	1.599	0.033	0.1603	0.0027	0.26039	969	13	958	15	1010	21	1010	21	5.14851
TSS1_68.FIN2	186	0.875	0.4822	0.0088	0.06389	0.0007	0.22712	399.3	6	399.2	4.2	393	24	399.2	4.2	0.0250438
TSS1_69.FIN2	59.8	0.614	1.608	0.04	0.1667	0.0026	0.29988	972	15	994	14	940	27	940	27	5.74468
TSS1_70.FIN2	168	1.178	0.518	0.01	0.06734	0.00072	0.30992	423.3	6.7	420.1	4.3	422	27	420.1	4.3	0.755965
TSS1_71.FIN2	111.8	1.889	5.195	0.092	0.3322	0.0059	0.70274	1851	15	1849	29	1862.7	9.8	1862.7	9.8	0.735491
TSS1_72.FIN2	80.9	0.749	11.22	0.26	0.4773	0.0085	0.61435	2540	22	2515	37	2550	17	2550	17	1.37255
TSS1_73.FIN2	76.7	1.012	1.668	0.042	0.1665	0.0045	0.47406	996	16	993	25	1008	27	1008	27	1.4881
TSS1_74.FIN2	71.1	2.249	1.526	0.04	0.1536	0.0026	0.19519	940	16	921	15	1000	25	1000	25	7.9
TSS1_75.FIN2	81.7	1.832	2.892	0.056	0.242	0.0036	0.052142	1379	15	1397	19	1363	25	1363	25	2.4945
TSS1_76.FIN2	328	2.63	4.143	0.033	0.2953	0.0028	0.66536	1663.2	6.6	1668	14	1653.4	8	1653.4	8	0.883029
TSS1_77.FIN2	213.8	1.789	1.822	0.022	0.1746	0.0031	0.40272	1053.1	8.1	1037	17	1074	17	1074	17	3.44507
TSS1_78.FIN2	95	0.661	0.475	0.014	0.0637	0.0011	0.22081	395.2	9.2	398.3	6.6	401	34	398.3	6.6	0.784413
TSS1_79.FIN2	163	1.258	4.678	0.04	0.3158	0.003	0.58623	1763.8	7.4	1769	15	1760.1	7	1760.1	7	0.505653
TSS1_80.FIN2	56.23	4.04	3.243	0.073	0.2461	0.0049	0.19267	1467	17	1418	25	1546	23	1546	23	8.27943
TSS1_81.FIN2	232	5.87	5.052	0.065	0.3219	0.0036	0.7965	1828	11	1799	18	1872.6	9.2	1872.6	9.2	3.93036
TSS1_82.FIN2	84.9	2.094	1.441	0.025	0.1492	0.0019	0.27106	906	11	896	10	954	26	954	26	6.07966
TSS1_83.FIN2	51.3	2.153	1.79	0.039	0.1779	0.0044	0.44999	1044	15	1055	24	1020	25	1020	25	3.43137
TSS1_84.FIN2	250	2.44	0.54	0.011	0.071	0.0013	0.47287	438	7.1	442	7.9	459	52	442	7.9	0.913242
TSS1_85.FIN2	70.5	2.877	2.186	0.054	0.2033	0.0049	0.17574	1176	17	1193	26	1159	23	1159	23	2.93356
TSS1_86.FIN2	399	2.019	2.687	0.038	0.2309	0.0028	0.81872	1324	11	1339	15	1297	10	1297	10	3.23824
TSS1_87.FIN2	44.2	0.796	2.34	0.16	0.21	0.016	0.80621	1229	51	1225	86	1274	31	1274	31	3.84615
TSS1_88.FIN2	509	7.9	5.84	0.16	0.2782	0.0084	0.88547	1952	24	1582	43	2353	21	2353	21	32.7667
TSS1_88.FIN2	29.71	1.63	10.44	0.32	0.418	0.0087	0.46876	2480	25	2251	40	2666	17	2666	17	15.5664
TSS1_89.FIN2	273	7.44	2.092	0.037	0.1924	0.0035	0.78441	1148	13	1134	19	1177	13	1177	13	3.65336
TSS1_90.FIN2	49.96	1.483	2.848	0.082	0.2379	0.0045	0.24974	1367	21	1375	23	1374	34	1374	34	0.0727802
TSS1_91.FIN2	21.95	2.25	1.56	0.13	0.1533	0.0047	0.43052	950	50	919	26	1073	48	1073	48	14.3523
TSS1_92.FIN2	39.8	0.968	1.484	0.046	0.1546	0.0028	0.030809	929	19	927	16	932	40	932	40	0.536481
TSS1_93.FIN2	413	2.574	2.7	0.024	0.2271	0.0022	0.52198	1328.2	6.5	1319	12	1341	11	1341	11	1.64057
TSS1_94.FIN2	40.77	1.313	13.22	0.19	0.5025	0.0062	0.33912	2694	14	2630	29	2747	13	2747	13	4.25919
TSS1_95.FIN2	170	1.27	1.899	0.021	0.1826	0.0016	0.24067	1081.3	7.1	1081	8.5	1080	13	1080	13	0.0925926
TSS1_96.FIN2	154.5	1.596	0.568	0.012	0.07458	0.00084	0.077754	457.2	7.4	463.7	5.1	421	31	463.7	5.1	1.4217
TSS1_97.FIN2	40.9	0.82	1.633	0.048	0.1657	0.0042	0.094137	985	19	988	23	1010	42	1010	42	2.17822
TSS1_98.FIN2	93	1.345	0.571	0.025	0.0681	0.0017	0.31476	458	16	425	10	592	54	425	10	7.20524
TSS1_99.FIN2	174.1	3.612	1.722	0.029	0.1697	0.0017	0.37537	1016	11	1010.6	9.6	1030	18	1030	18	1.8835
TSS1_100.FIN2	84.1	1.148	1.584	0.048	0.1616	0.004	0.27184	963	19	966	22	976	29	976	29	1.02459
TSS1_101.FIN2	596	145	1.619	0.023	0.1616	0.0013	0.58103	979.3	9.6	965.6	7.3	1010.6	9.8	1010.6	9.8	4.4528
TSS1_103.FIN2	491	1.393	1.974	0.023	0.1826	0.0022	0.62082	1106.4	7.9	1081	12	1165	12	1165	12	7.2103
TSS1_105.FIN2	587	10.7	1.852	0.04	0.1758	0.0033	0.84267	1063	14	1044	18	1114	13	1114	13	6.28366
TSS1_106.FIN2	503	2.18	2.072	0.027	0.1945	0.0025	0.58574	1139.3	9	1145	14	1136	15	1136	15	0.792254
TSS1_108.FIN2	114.4	1.073	2.179	0.043	0.1996	0.0023	0.16899	1174	14	1173	12	1178	26	1178	26	0.424448
TSS1_109.FIN2	86	1.487	3.457	0.085	0.2689	0.0066	0.72628	1516	19	1535	33	1502	12	1502	12	2.19707
TSS1_110.FIN2	49.1	0.891	2.974	0.073	0.2336	0.0043	0.41186	1400	19	1353	23	1465	26	1465	26	7.64505
TSS1_111.FIN2	423.9	1.576	1.758	0.019	0.1716	0.002	0.37278	1029.9	6.9	1021	11	1043	12	1043	12	2.1093
TSS1_112.FIN2	46.8	2.32	3.106	0.094	0.2358	0.0043	0.12178	1433	23	1365	23	1531	27	1531	27	10.8426
TSS1_113.FIN2	91.5	1.145	13.98	0.24	0.5327	0.0076	0.83619	2747	17	2759	34	2739.1	9.5	2739.1	9.5	0.726516
TSS1_114.FIN2	52.8	1.555	0.633	0.023	0.0793	0.0013	0.23758	496	15	491.8	8	497	54	491.8	8	0.846774
TSS1_115.FIN2	200	8.3	1.931	0.043	0.1896	0.0041	0.65719	1091	15	1119	22	1057	19	1057	19	5.86566
TSS1_116.FIN2	526	2.013	4.44	0.029	0.2986	0.0024	0.59552	1719.7	5.4	1684	12	1768.7	7.3	1768.7	7.3	4.78883
TSS1_117.FIN2	81.6	1.2	1.853	0.077	0.1767	0.0038	0.5432	1063	28	1049	21	1090	18	1090	18	3.76147
TSS1_118.FIN2	56	1.19	13.46	0.2	0.5204	0.0084	0.65424	2712	14	2700	36	2736.1	8.2	2736.1	8.2	1.3194
TSS1_119.FIN2	183.9	0.986	3.989	0.037	0.286	0.0031	0.45383	1631.6	7.6	1621	16	1653	11	1653	11	1.93587
TSS1_120.FIN2	351	2.78	2.128	0.03	0.196	0.0037	0.52186	1157.6	9.8	1154	20	1172	15	1172	15	1.53584
TSS2_1.FIN2	82.5	2.27	2.152	0.043	0.1884	0.0039	0.39802	1165	14	1112	21	1265	18	1265	18	12.0949
TSS2_2.FIN2	80.99	0.6179	11.61	0.14	0.481	0.0065	0.56713	2574	11	2531	28	2616	12	2616	12	3.24924
TSS2_3.FIN2	21	1.464	0.571	0.029	0.0718	0.0026	0.14396	457	19	447	16	631	77	447	16	2.18818
TSS2_4.FIN2	132.6	1.341	4.394	0.06	0.2954	0.0037	0.6934	1711	11	1672	17	1759.3	6.1	1759.3	6.1	4.9622
TSS2_5.FIN2	90.8	0.3181	17.31	0.13	0.5204	0.0053	0.64979	2953	7.7	2700	23	3136.1	9	3136.1	9	13.9058
TSS2_6.FIN2	51	1.092	2.286	0.033	0.1982	0.0027	0.11592	1208.8	9.8	1165	14	1270	23	1270	23	8.26772
TSS2_8.FIN2	171	1.569	0.567	0.01	0.0705	0.0012	0.50926	455.9	6.8	439.4	7	566	20	439.4	7	3.61921
TSS2_8.FIN2	211.5	3.145	2.032	0.073	0.1789	0.0052	0.91985	1125	24	1061	28	1268	13	1268	13	16.3249
TSS2_9.FIN2	240	2.748	1.696	0.016	0.168	0.0013	0.61715	1006.6	5.9	1001.1	7.3	1024	14	1024	14	2.23633
TSS2_10.FIN2	87	1.429	2.024	0.057	0.1869	0.0046	0.71157	1125	20	1104	25	1162	23	1162	23	4.99139
TSS2_11.FIN2	254	1.43	1.433	0.022	0.145	0.0017	0.64645	904.4	8.8	872.6	9.6	995	13	995	13	12.3015
TSS2_12.FIN2	291	2.9	3.385	0.031	0.2585	0.0024	0.5745	1500.6	7.3	1482	12	1510	11	1510	11	1.8543
TSS2_13.FIN2	155.4	7.94	11.607	0.077	0.4957	0.0043	0.48457	2573.8	6.3	2595	18	2562.1	9.3	2562.1	9.3	1.2841
TSS2_14.FIN2	99.17	1.021	2.163	0.027	0.1917	0.0025	0.17977	1168.7	8.6	1130	13	1235	17	1235	17	8.50202
TSS2_15.FIN2	87.2	1.754	3.065	0.046	0.2444	0.0038	0.65467	1423	12	1409	20	1449	15	1449	15	2.76052
TSS2_16.FIN2	56.6	1.012	0.511	0.015	0.0675	0.0011	0.35479	419	10	420.9	6.5	408	43	420.9	6.5	0.453461
TSS2_17.FIN2	102.5	1.142	0.518	0.011	0.06683	0.00089	0.12905	424.6	7.2	417.8	5.2	483	28	417.8	5.2	1.60151
TSS2_18.FIN2	91.2	1.336	3.91	0.061	0.273	0.0042	0.65853	1615	13	1559	22	1699	13	1699	13	8.24014
TSS2_19.FIN2	240.6	2.392	2.093	0.019	0.1918	0.0015	0.32968	1146.4	6.2	1131.1	8.2	1174	11	1174	11	3.65417
TSS2_20.FIN2	746	2.077	2.317	0.04	0.1699	0.0029	0.48368	1217	12	1012	16	1599	21	1599	21	36.7104
TSS2_21.FIN2	361	1.856	1.774	0.016	0.1732	0.0017	0.48442	1035.9	6	1029.4	9.6	1059	10	1059	10	2.79509
TSS2_22.FIN2	397	1.0982	3.186	0.045	0.2295	0.0024	0.51626	1453	11	1332	13	1643	14	1643	14	18.9288
TSS2_23.FIN2	380	4.38	1.826	0.026	0.1664	0.0019	0.75188	1054.3	9.5	992	11	1194	10	1194	10	16.9179
TSS2_24.FIN2	260	1.396	1.969	0.021	0.1849	0.0018	0.30169	1104.8	7.1	1093.8	9.9	1133	18	1133	18	3.45984
TSS2_25.FIN2	63.4	1.231	1.743	0.037	0.1665	0.0038	0.39605	1026	14	996	20	1073	22	1073	22	7.17614
TSS2_26.FIN2	166	1.266	0.791	0.011	0.09551	0.00096	0.29678	591.3	6.2	588	5.7	612	19	588	5.7	0.558092
TSS2_27.FIN2	40.5	1.073	1.937	0.037	0.1817	0.0026	0.24843	1095	13	1076	14	1125	19	1125	19	4.35556
TSS2_28.FIN2	356	11.42	1.474	0.018	0.1508	0.0021	0.57395	919.6	7.5	906	12	982	11	982	11	7.73931
TSS2_29.FIN2	114.7	1.504	1.766	0.026	0.1712	0.0021	0.535	1032.5	9.4	1019	12	1055	20	1055	20	3.41232
TSS2_30.FIN2	115	2.407	1.7	0.049	0.169	0.0037	0.8145	1007	19	1006	20	1017	24	1017	24	1.08161
TSS2_31.FIN2	66.1	1.77	2.616	0.055	0.2254	0.0052	0.58714	1308	14	1310	27	1303	22	1303	22	0.537222
TSS2_32.FIN2	98.7	1.378	2.071	0.03	0.1899	0.0027	0.51356	1139	10	1121	15	1180	19	1180	19	5
TSS2_33.FIN2	62.2	0.651	1.522	0.031	0.1535	0.0025	0.3642	938	13	923	13	987	26	987	26	6.4843
TSS2_34.FIN2	87.7	1.73	1.6	0.029	0.1583	0.0026	0.26644	970	11	947	15	1032	16	1032	16	8.23643
TSS2_35.FIN2	55.4	1.604	2.324	0.058	0.207	0.0035	0.54716	1224	17	1212	19	1224	21	1224	21	0.980392
TSS2_36.FIN2	278.1	3.23	0.493	0.011	0.0648	0.0012	0.27684	406.9	7.5	404.9	7.1	417	29	404.9	7.1	0.491521
TSS2_37.FIN2	87.9	1.281	1.767	0.023	0.1734	0.0021	0.29324	1033	8.5	1031	12	1039	17	1039	17	0.769971
TSS2_38.FIN2	159.5	2.07	1.678	0.024	0.162	0.002	0.30892	1001.4	8.8	968	11	1063	16	1063	16	8.93697
TSS2_39.FIN2	98.59	0.623	4.555	0.063	0.2984	0.0044	0.70976	1740	12	1683	22	1815.9	8.2	1815.9	8.2	7.31868
TSS2_41.FIN2	405.4	1.918	1.834	0.041	0.1533	0.0027	0.79858	1057	15	919	15	1373	17	1373	17	33.0663
TSS2_42.FIN2	500	0.935	2.71	0.04	0.225	0.005	0.71105	1331	11	1308	26	1371	19	1371	19	4.59519
TSS2_43.FIN2	49.66	0.849	2.267	0.052	0.2051	0.0036	0.23105	1201	16	1202	19	1216	25	1216	25	1.15132
TSS2_44.FIN2	131	1.381	2.216	0.043	0.1999	0.0029	0.74888	1185	13	1174	15	1201	12	1201	12	2.24813
TSS2_45.FIN2	32.35	0.48	1.839	0.054	0.1784	0.0035	0.4587	1057	19	1058	19	1042	36	1042	36	1.53551
TSS2_46.FIN2	211	4.85	0.4824	0.0093	0.06469	0.00073	0.45442	399.3	6.4	404.1	4.4	411	25	404.1	4.4	1.2021
TSS2_47.FIN2	16.83	0.643	1.615	0.075	0.1586	0.0067	0.23459	975	29	948	37	1099	44	1099	44	13.7398
TSS2_48.FIN2	165.1	2.151	1.719	0.021	0.1709	0.0017	0.46996	1015.1	7.9	1017.2	9.1	1020	11	1020	11	0.27451
TSS2_49.FIN2	97.2	1.319	2.724	0.053	0.2253	0.0033	0.49581	1334	15	1314	16	1373	14	1373	14	4.29716
TSS2_50.FIN2	96	1.55	1.931	0.042	0.1867	0.0034	0.51019	1091	15	1103	18	1066	22	1066	22	3.47092
TSS2_51.FIN2	38.33	1	1.834	0.057	0.1787	0.0034	0.27839	1057	20	1060	19	1033	39	1033	39	2.61375
TSS2_52.FIN2	135.3	1.763	3.637	0.051	0.2644	0.0027	0.72481	1557	11	1512	14	1634	11	1634	11	7.46634
TSS2_53.FIN2	167	1.107	4.931	0.064	0.327	0.0058	0.73481	1807	11	1824	28	1789.1	7.8	1789.1	7.8	1.9507
TSS2_54.FIN2	318.8	2.979	4.992	0.04	0.3276	0.0031	0.51401	1817.7	6.8	1827	15	1818.7	9.7	1818.7	9.7	0.45637
TSS2_55.FIN2	147.3	2.461	1.652	0.026	0.1669	0.0025	0.66382	992	10	995	14	1007	14	1007	14	1.19166
TSS2_56.FIN2	82.9	1.663	2.701	0.049	0.2212	0.0051	0.63252	1332	12	1288	27	1407	15	1407	15	8.45771
TSS2_57.FIN2	65.8	1.939	1.831	0.066	0.1754	0.0039	0.66872	1061	25	1042	22	1091	26	1091	26	4.49129
TSS2_58.FIN2	158.3	1.649	2.134	0.03	0.1994	0.0021	0.40782	1159.5	9.7	1172	11	1143	14	1143	14	2.53718
TSS2_59.FIN2	67	0.558	13.22	0.13	0.5189	0.0049	0.54925	2694.8	9.1	2694	21	2703.7	9.1	2703.7	9.1	0.358768
TSS2_60.FIN2	90	1.96	2.024	0.064	0.1913	0.0041	0.5927	1126	21	1128	22	1107	36	1107	36	1.89702
TSS2_61.FIN2	134	1.487	2.057	0.04	0.1917	0.0033	0.45439	1134	13	1131	18	1150	15	1150	15	1.65217
TSS2_62.FIN2	111.2	1.467	3.413	0.053	0.2649	0.0033	0.57024	1509	12	1514	17	1518	13	1518	13	0.263505
TSS2_63.FIN2	50.89	1.079	3.599	0.09	0.2699	0.0055	0.26738	1548	20	1540	28	1606	30	1606	30	4.10959
TSS2_64.FIN2	215	3.07	1.876	0.033	0.1803	0.0031	0.58163	1072	12	1069	17	1079	17	1079	17	0.926784
TSS2_65.FIN2	373	2.99	1.698	0.029	0.1703	0.0034	0.80337	1008	11	1013	19	1022	15	1022	15	0.880626
TSS2_66.FIN2	43	1.251	1.502	0.043	0.1545	0.0035	0.36216	930	17	926	20	939	30	939	30	1.38445
TSS2_67.FIN2	56.6	1.413	4.032	0.092	0.2774	0.0069	0.86297	1638	19	1577	35	1716	14	1716	14	8.10023
TSS2_68.FIN2	121.2	1.151	0.501	0.012	0.066	0.0014	0.31073	412	8.2	412	8.2	428	26	412	8.2	0
TSS2_69.FIN2	180.1	1.562	9.6	0.11	0.4369	0.0051	0.77354	2397	10	2341	24	2462.1	8.2	2462.1	8.2	4.91857
TSS2_70.FIN2	191	1.33	2.9	0.046	0.2359	0.0036	0.72352	1381	12	1365	19	1400	11	1400	11	2.5
TSS2_71.FIN2	431	4.46	2.018	0.029	0.1892	0.0031	0.56115	1121.3	9.8	1117	17	1146	20	1146	20	2.53054
TSS2_72.FIN2	38	1.933	1.611	0.039	0.1631	0.0033	0.040967	973	15	974	18	965	43	965	43	0.932642
TSS2_73.FIN2	77.7	1.681	1.887	0.053	0.1796	0.0034	0.29557	1076	18	1069	20	1093	24	1093	24	2.19579
TSS2_74.FIN2	145.3	4.41	1.804	0.025	0.1717	0.0024	0.4627	1046.6	9	1021	13	1109	12	1109	12	7.93508
TSS2_76.FIN2	260.6	1.981	18.81	0.16	0.5783	0.0058	0.77451	3032.9	8.4	2941	24	3100.5	4.6	3100.5	4.6	5.14433
TSS2_78.FIN2	267	2.315	0.629	0.016	0.0742	0.0013	0.41041	495.3	9.8	461.5	7.9	671	28	461.5	7.9	6.82415
TSS2_78.FIN2	234	1.14	2.37	0.17	0.18	0.012	0.95718	1225	52	1066	64	1528	25	1528	25	30.2356
TSS2_79.FIN2	446	4.88	1.7	0.036	0.1684	0.0041	0.73128	1008	14	1003	22	1037	11	1037	11	3.27869
TSS2_80.FIN2	92.03	0.5768	3.531	0.049	0.246	0.0042	0.39638	1534	11	1418	22	1718	17	1718	17	17.4622
TSS2_81.FIN2	194	0.521	1.823	0.051	0.1728	0.0041	0.86565	1052	18	1027	22	1108	13	1108	13	7.31047
TSS2_82.FIN2	45.5	0.984	1.916	0.041	0.1831	0.0033	0.32065	1087	14	1084	18	1102	22	1102	22	1.63339
TSS2_83.FIN2	28.9	0.677	1.717	0.056	0.1658	0.004	0.19736	1013	21	988	22	1100	32	1100	32	10.1818
TSS2_84.FIN2	351	5.18	1.653	0.024	0.1667	0.002	0.63673	990.6	9.3	994	11	1002	12	1002	12	0.798403
TSS2_85.FIN2	146.1	5.59	1.657	0.025	0.1668	0.0024	0.27762	993.8	9.7	994	13	1009	16	1009	16	1.48662
TSS2_86.FIN2	348	2.38	2.16	0.034	0.1991	0.0029	0.70313	1168	11	1170	16	1172	13	1172	13	0.170648
TSS2_87.FIN2	125.5	2.494	1.786	0.021	0.1747	0.0015	0.38026	1039.9	7.6	1037.9	8	1040	13	1040	13	0.201923
TSS2_88.FIN2	154.9	0.6793	13.2	0.13	0.5309	0.0046	0.62913	2693.8	9.1	2745	19	2668	8	2668	8	2.88606
TSS2_89.FIN2	99.8	1.384	2.746	0.063	0.2315	0.0047	0.6068	1340	17	1342	25	1367	17	1367	17	1.82882
TSS2_90.FIN2	78.2	0.94	3.819	0.084	0.2792	0.0049	0.45455	1596	18	1587	24	1612	20	1612	20	1.55087
TSS2_91.FIN2	85.5	2.737	1.712	0.041	0.1687	0.0034	0.50056	1012	16	1005	19	1049	16	1049	16	4.19447
TSS2_92.FIN2	75.5	1.211	1.863	0.03	0.1824	0.0026	0.50365	1069	11	1080	14	1066	15	1066	15	1.31332
TSS2_94.FIN2	127.5	1.585	1.658	0.045	0.1656	0.0033	0.47608	992	17	988	19	1017	15	1017	15	2.85152
TSS2_96.FIN2	84.4	0.537	2.103	0.039	0.1957	0.0038	0.6248	1149	13	1152	21	1167	21	1167	21	1.28535
TSS2_97.FIN2	179.3	3.43	4.888	0.049	0.3254	0.0038	0.4613	1799.8	8.4	1816	18	1790.1	9.2	1790.1	9.2	1.44685
TSS2_99.FIN2	112.5	0.861	4.293	0.07	0.3004	0.0045	0.77247	1691	14	1693	22	1688	11	1688	11	0.296209
TSS2_101.FIN2	183.2	1.21	3.349	0.04	0.2589	0.0026	0.34469	1492.2	9.3	1484	13	1512	15	1512	15	1.85185
TSS2_102.FIN2	133.6	2.112	8.44	0.19	0.3617	0.006	0.50183	2279	21	1990	28	2576	20	2576	20	22.7484
TSS2_103.FIN2	95.5	1.372	1.816	0.046	0.1699	0.0036	0.32844	1050	17	1012	20	1153	27	1153	27	12.229
TSS2_104.FIN2	873	0.758	1.11	0.062	0.07011	0.00075	0.02848	754	31	436.8	4.5	1920	100	DISC	DISC	77.25
TSS2_105.FIN2	88.5	1.157	2.171	0.035	0.1988	0.0033	0.36066	1171	11	1169	18	1184	20	1184	20	1.26689
TSS2_106.FIN2	91.6	1.074	1.661	0.029	0.1627	0.0024	0.36629	993	11	972	13	1058	16	1058	16	8.12854
TSS2_107.FIN2	56.3	0.972	0.584	0.018	0.0746	0.0012	0.25773	468	11	463.7	7.4	498	39	463.7	7.4	0.918803
TSS2_108.FIN2	274.1	3.915	3.988	0.041	0.291	0.0032	0.67542	1632.9	8.7	1646	16	1626	12	1626	12	1.23001
TSS2_109.FIN2	54.3	0.897	10.17	0.12	0.4593	0.0078	0.60579	2450	11	2436	34	2478	11	2478	11	1.69492
TSS2_110.FIN2	78.2	0.596	0.545	0.015	0.06935	0.00094	0.11712	440.7	9.6	432.2	5.7	515	40	432.2	5.7	1.92875
TSS2_111.FIN2	198	0.68	3.78	0.055	0.2806	0.0046	0.72871	1588	12	1594	23	1586	12	1586	12	0.504414
TSS2_112.FIN2	72.2	0.75	1.615	0.04	0.1652	0.0025	0.3185	975	16	986	14	972	22	972	22	1.44033
TSS2_113.FIN2	28.47	0.473	0.591	0.026	0.074	0.0015	0.075549	470	17	460.2	8.9	562	55	460.2	8.9	2.08511
TSS2_114.FIN2	192.5	2.301	2.055	0.029	0.1933	0.0024	0.58327	1135.8	8.8	1139	13	1121	16	1121	16	1.60571
TSS2_115.FIN2	28.4	0.898	1.957	0.076	0.1785	0.0054	0.65707	1100	26	1059	30	1203	21	1203	21	11.9701
TSS2_116.FIN2	56.1	0.957	3.227	0.056	0.251	0.004	0.45308	1467	13	1443	21	1501	15	1501	15	3.86409
TSS2_117.FIN2	107	1.19	2.123	0.06	0.1984	0.0056	0.67277	1155	19	1166	30	1127	22	1127	22	3.46051
TSS2_119.FIN2	438	1.97	1.945	0.033	0.1705	0.0045	0.63656	1096	11	1015	25	1281	16	1281	16	20.765
TSS2_120.FIN2	80	1.95	2.627	0.037	0.2244	0.0044	0.64765	1308	10	1305	23	1332	12	1332	12	2.02703
GJ1_1.FIN2	286.3	35.23	0.8208	0.0088	0.09872	0.0009	0.54652	608.3	4.9	606.9	5.3	617	13	606.9	5.3	0.23015
GJ1_2.FIN2	277.3	34.65	0.8147	0.0081	0.09895	0.0009	0.30048	604.9	4.5	608.2	5.3	610	14	608.2	5.3	0.545545
GJ1_3.FIN2	281.1	33.9	0.8185	0.0092	0.0984	0.001	0.50278	607.6	5	605.2	6.1	616	14	605.2	6.1	0.394997
GJ1_4.FIN2	288.7	34.74	0.8152	0.0085	0.0983	0.0011	0.43087	605.2	4.8	604.3	6.2	611	16	604.3	6.2	0.148711
GJ1_5.FIN2	286	34.24	0.8137	0.009	0.09834	0.00082	0.46837	604.3	5	604.6	4.8	599	12	604.6	4.8	0.0496442
GJ1_6.FIN2	288.8	34.04	0.8208	0.0086	0.09934	0.00096	0.45839	609	4.9	610.5	5.6	596	14	610.5	5.6	0.246305
GJ1_7.FIN2	281.6	35.26	0.812	0.0069	0.0974	0.0011	0.33877	603.4	3.8	599.1	6.3	631	15	599.1	6.3	0.712628
GJ1_8.FIN2	286.9	34.44	0.8191	0.0074	0.09847	0.00097	0.49226	607.9	4.2	605.4	5.7	624	12	605.4	5.7	0.411252
GJ1_9.FIN2	284.7	34.45	0.8226	0.009	0.09798	0.00098	0.51059	609.3	5	602.5	5.7	626	14	602.5	5.7	1.11603
GJ1_10.FIN2	281.4	34.92	0.8031	0.0086	0.09793	0.00095	0.4819	598.4	4.8	602.2	5.6	580	13	602.2	5.6	0.635027
GJ1_11.FIN2	291.2	34.81	0.8167	0.0081	0.09826	0.00099	0.25671	606.6	4.4	604.1	5.8	620	15	604.1	5.8	0.412133
GJ1_12.FIN2	304.5	35.67	0.8173	0.0087	0.0987	0.00088	0.50986	606.3	4.8	606.8	5.1	621	13	606.8	5.1	0.0824674
GJ1_13.FIN2	292.9	35.48	0.8002	0.0095	0.09721	0.0009	0.49381	596.7	5.4	598	5.3	594	13	598	5.3	0.217865
GJ1_14.FIN2	288.3	34.4	0.7961	0.0092	0.09668	0.00086	0.56625	594.4	5.2	594.9	5	596	11	594.9	5	0.0841184
GJ1_15.FIN2	287	33.64	0.8018	0.0085	0.0959	0.001	0.45733	597.6	4.8	590.5	5.9	621	11	590.5	5.9	1.18809
GJ1_16.FIN2	289.2	34.11	0.7974	0.0088	0.0968	0.00078	0.43663	595.8	5.1	595.6	4.6	608	13	595.6	4.6	0.0335683
GJ1_17.FIN2	286.3	33.55	0.802	0.0096	0.0973	0.001	0.55389	597.7	5.4	598.6	6	600	11	598.6	6	0.150577
GJ1_18.FIN2	287.8	33.99	0.7946	0.0078	0.09659	0.0008	0.47689	593.6	4.4	594.4	4.7	586	11	594.4	4.7	0.134771
GJ1_19.FIN2	281.4	33.45	0.7932	0.0084	0.09651	0.00085	0.31258	592.8	4.7	593.9	5	594	13	593.9	5	0.18556
GJ1_20.FIN2	288.8	33.23	0.8051	0.0092	0.09596	0.00096	0.23333	599.5	5.2	590.6	5.7	637	15	590.6	5.7	1.48457
GJ1_21.FIN2	282.9	32.64	0.794	0.01	0.0955	0.00092	0.34639	593	5.7	588	5.4	618	17	588	5.4	0.84317
GJ1_22.FIN2	282.9	33.74	0.798	0.01	0.0971	0.001	0.47367	595.5	5.6	597.4	5.9	596	17	597.4	5.9	0.31906
GJ1_23.FIN2	285.2	32.98	0.794	0.011	0.09654	0.00088	0.34673	592.8	6	594	5.2	606	16	594	5.2	0.202429
GJ1_24.FIN2	288.8	33.52	0.7973	0.0087	0.09671	0.00095	0.40408	595.8	4.8	595	5.6	586	12	595	5.6	0.134273
GJ1_25.FIN2	288.6	33.45	0.803	0.011	0.0964	0.001	0.55064	598.4	6.1	593.4	6.1	621	11	593.4	6.1	0.835561
GJ1_26.FIN2	288.3	34.05	0.8036	0.0086	0.09753	0.00094	0.39522	599.3	4.7	599.8	5.5	615	15	599.8	5.5	0.0834307
GJ1_27.FIN2	287.8	34.22	0.8025	0.0094	0.0966	0.001	0.36858	598	5.3	594.3	6	617	14	594.3	6	0.618729
GJ1_28.FIN2	290.9	33.45	0.828	0.01	0.09933	0.00099	0.26827	612.5	5.6	610.4	5.8	625	13	610.4	5.8	0.342857
GJ1_29.FIN2	276.7	34.25	0.8244	0.0087	0.09828	0.00086	0.36516	610.3	4.8	604.3	5	623	14	604.3	5	0.983123
GJ1_30.FIN2	282.2	34.57	0.828	0.011	0.1002	0.0012	0.49759	612.4	6.2	615.5	7.2	612	15	615.5	7.2	0.506205
GJ1_31.FIN2	290.1	34.53	0.8101	0.0092	0.0985	0.0011	0.43281	602.3	5.2	605.7	6.4	610	13	605.7	6.4	0.564503
GJ1_32.FIN2	296.3	35.18	0.8163	0.0087	0.09787	0.00092	0.46064	605.8	4.9	601.9	5.4	624	13	601.9	5.4	0.643777
GJ1_33.FIN2	287.7	33.48	0.814	0.01	0.09682	0.00092	0.34925	604.5	5.6	595.7	5.4	626	15	595.7	5.4	1.45575
GJ1_34.FIN2	294.1	34.15	0.8067	0.0095	0.09793	0.00094	0.38788	600.3	5.3	602.2	5.5	603	17	602.2	5.5	0.316508
GJ1_35.FIN2	285	33.64	0.8036	0.0081	0.09679	0.00088	0.35401	598.6	4.5	595.6	5.2	610	14	595.6	5.2	0.501169
GJ1_36.FIN2	289.6	34.23	0.8035	0.0096	0.09779	0.00094	0.39849	598.6	5.4	601.4	5.5	590	14	601.4	5.5	0.467758
GJ1_37.FIN2	287	34.19	0.8157	0.009	0.09733	0.00084	0.3835	605.4	5	598.7	4.9	638	13	598.7	4.9	1.10671
GJ1_38.FIN2	290.3	34.19	0.8078	0.008	0.0979	0.00085	0.43029	601	4.5	602.1	5	604	13	602.1	5	0.183028
GJ1_39.FIN2	294.9	33.37	0.8084	0.0099	0.0972	0.001	0.41996	602	5.7	598.1	6.1	608	17	598.1	6.1	0.647841
GJ1_40.FIN2	272.9	33.62	0.806	0.01	0.09843	0.00092	0.42737	600.7	5.5	605.2	5.4	597	15	605.2	5.4	0.749126
GJ1_41.FIN2	288.9	33.81	0.8067	0.0087	0.0981	0.00087	0.33648	600.4	4.9	603.9	5.3	603	16	603.9	5.3	0.582945
GJ1_42.FIN2	288	34.6	0.8058	0.0078	0.09699	0.00098	0.33126	599.9	4.4	596.7	5.7	626	16	596.7	5.7	0.533422
GJ1_43.FIN2	292.8	33.23	0.8168	0.0084	0.0978	0.001	0.47657	606.1	4.7	601.3	6	629	14	601.3	6	0.791949
GJ1_44.FIN2	301.4	34.37	0.808	0.011	0.098	0.001	0.34029	601	5.9	602.5	6.1	592	17	602.5	6.1	0.249584
GJ1_45.FIN2	294.2	33.36	0.821	0.01	0.09833	0.00091	0.49481	608.4	5.6	604.6	5.3	626	15	604.6	5.3	0.624589
GJ1_46.FIN2	287.8	34.96	0.812	0.01	0.09825	0.00085	0.48472	603.6	5.6	604.1	5	603	13	604.1	5	0.0828363
GJ1_47.FIN2	277.5	33.91	0.809	0.01	0.0983	0.001	0.44292	601.6	5.7	604.6	6	592	17	604.6	6	0.49867
GJ1_48.FIN2	273	34.1	0.816	0.01	0.0979	0.0011	0.30868	606.4	5.8	602.2	6.8	617	19	602.2	6.8	0.692612
GJ1_49.FIN2	285.1	34.7	0.814	0.01	0.0978	0.0011	0.33014	604.5	5.7	601.6	6.3	606	16	601.6	6.3	0.479735
GJ1_50.FIN2	286.7	34.62	0.813	0.011	0.098	0.0011	0.33006	603.8	6.1	602.9	6.5	610	18	602.9	6.5	0.149056
GJ1_51.FIN2	292.2	34.76	0.819	0.0086	0.09781	0.00097	0.26707	607.3	4.8	601.5	5.7	624	18	601.5	5.7	0.955047
GJ1_52.FIN2	302.5	34.23	0.8124	0.0091	0.09832	0.00092	0.22877	603.6	5.1	604.5	5.4	616	18	604.5	5.4	0.149105
GJ1_53.FIN2	286.2	34.47	0.813	0.011	0.09694	0.00094	0.38644	603.7	6	596.4	5.5	641	16	596.4	5.5	1.20921
GJ1_54.FIN2	289	34.43	0.7972	0.009	0.0977	0.00099	0.38094	595.7	5.2	601.6	5.7	578	14	601.6	5.7	0.990431
GJ1_55.FIN2	287.7	34.85	0.809	0.012	0.09717	0.00099	0.32986	601.8	6.6	597.7	5.8	619	19	597.7	5.8	0.681289
GJ1_56.FIN2	290.4	33.84	0.804	0.01	0.09732	0.00095	0.13241	599.5	5.5	598.6	5.6	599	17	598.6	5.6	0.150125
GJ1_57.FIN2	293	33.87	0.8039	0.008	0.09664	0.00096	0.36101	598.8	4.5	594.7	5.7	612	14	594.7	5.7	0.684703
GJ1_58.FIN2	299.1	33.96	0.8026	0.0097	0.09744	0.00092	0.32087	598.8	5.6	599.4	5.4	606	16	599.4	5.4	0.1002
GJ1_59.FIN2	285.4	34.13	0.824	0.011	0.09882	0.00081	0.39304	609.9	6.2	607.5	4.8	605	17	607.5	4.8	0.393507
GJ1_60.FIN2	289.8	34.41	0.813	0.012	0.09745	0.00088	0.12032	603.6	6.5	599.4	5.2	627	18	599.4	5.2	0.695825
GJ1_61.FIN2	286.9	34.1	0.817	0.012	0.0976	0.001	0.33525	605.9	6.7	600.6	6	624	20	600.6	6	0.874732
GJ1_62.FIN2	286.5	33.78	0.803	0.013	0.09798	0.00084	0.42944	597.9	7.1	602.5	5	584	16	602.5	5	0.769359
GJ1_63.FIN2	283.1	34.21	0.795	0.012	0.09636	0.00097	0.14235	594.5	6.7	593	5.7	601	22	593	5.7	0.252313
GJ1_64.FIN2	287.6	34.6	0.795	0.012	0.0959	0.001	0.34337	594.4	6.6	590.2	5.9	622	18	590.2	5.9	0.706595
GJ1_65.FIN2	295	33.45	0.822	0.012	0.0985	0.001	0.33444	608.7	6.5	605.7	5.9	624	17	605.7	5.9	0.492854
GJ1_66.FIN2	283.2	34.98	0.8111	0.0093	0.09663	0.00086	0.39945	602.8	5.2	594.6	5	638	14	594.6	5	1.36032
GJ1_67.FIN2	272.3	34.6	0.808	0.012	0.0974	0.0011	0.31425	602	6.4	598.9	6.5	615	21	598.9	6.5	0.51495
GJ1_68.FIN2	277.7	34.63	0.803	0.011	0.0975	0.0013	0.36657	597.9	6.3	599.5	7.7	610	18	599.5	7.7	0.267603
GJ1_69.FIN2	288.9	34.02	0.814	0.01	0.0982	0.00093	0.47975	604.4	5.8	603.8	5.5	590	17	603.8	5.5	0.099272
GJ1_70.FIN2	289.6	34.9	0.804	0.012	0.09789	0.00082	0.22845	600.6	6.5	602.7	5	590	21	602.7	5	0.34965
GJ1_71.FIN2	293.1	34.17	0.809	0.0098	0.09807	0.00088	0.24178	601.6	5.5	603	5.2	599	20	603	5.2	0.232713
GJ1_72.FIN2	306.5	34.52	0.813	0.013	0.0974	0.001	0.46547	604.4	7.1	599.1	6	623	18	599.1	6	0.876903
GJ1_73.FIN2	281.3	34.08	0.813	0.012	0.0978	0.0011	0.28301	603.6	6.9	601.5	6.7	612	21	601.5	6.7	0.347913
GJ1_74.FIN2	291.7	33.78	0.811	0.013	0.0965	0.0012	0.5099	603.3	7.2	594	7.1	616	19	594	7.1	1.54152
GJ1_75.FIN2	280.1	33.9	0.819	0.012	0.0984	0.0011	0.33692	606.9	6.9	604.9	6.3	625	20	604.9	6.3	0.329544
GJ1_76.FIN2	282.9	34.34	0.81	0.015	0.0976	0.0012	0.52479	603	8.2	600	7	609	23	600	7	0.497512
GJ1_77.FIN2	285.7	35	0.807	0.012	0.0985	0.0012	0.22133	600.2	7	605.8	6.8	593	20	605.8	6.8	0.933022
GJ1_78.FIN2	291	34.6	0.815	0.013	0.0965	0.0017	0.026706	605.6	7.3	593.9	9.9	663	27	593.9	9.9	1.93197
GJ1_79.FIN2	286.1	34.7	0.802	0.013	0.0977	0.001	0.47934	597.6	7.3	600.9	6.1	594	15	600.9	6.1	0.552209
	0	0	0	0	0	0	0
PAK1_1.FIN2	393.8	0.88	0.0429	0.0012	0.00656	0.0001	0.10795	42.7	1.2	42.14	0.67	229	37	42.14	0.67	1.31148
PAK1_2.FIN2	378.9	0.874	0.0416	0.0013	0.00649	0.00012	0.1683	41.4	1.2	41.71	0.75	195	41	41.71	0.75	0.748792
PAK1_3.FIN2	399	0.881	0.0416	0.0015	0.00648	0.00012	0.17435	41.4	1.5	41.62	0.78	202	39	41.62	0.78	0.531401
PAK1_4.FIN2	411	0.882	0.0424	0.0016	0.00657	0.00012	0.0059084	42.2	1.6	42.2	0.78	187	47	42.2	0.78	0
PAK1_5.FIN2	397	0.872	0.0432	0.0019	0.00653	0.00012	0.25882	42.9	1.9	41.93	0.77	259	53	41.93	0.77	2.26107
PAK1_6.FIN2	434	0.872	0.0417	0.0017	0.00633	0.00014	0.025295	41.4	1.6	40.67	0.88	253	50	40.67	0.88	1.76329
PAK1_7.FIN2	417	0.879	0.043	0.0021	0.00659	0.00015	0.12151	42.7	2.1	42.32	0.97	263	57	42.32	0.97	0.88993
PAK1_8.FIN2	403.1	0.898	0.0406	0.0022	0.00647	0.00017	0.25436	40.4	2.1	41.6	1.1	241	63	41.6	1.1	2.9703
PAK1_9.FIN2	402	0.886	0.0414	0.002	0.00653	0.00023	0.010847	41.2	2	41.9	1.5	235	52	41.9	1.5	1.69903
PAK1_10.FIN2	371	0.872	0.0426	0.0025	0.00635	0.00021	0.36527	42.3	2.5	40.8	1.3	254	58	40.8	1.3	3.5461
PAK1_11.FIN2	364.7	0.864	0.0423	0.0022	0.00631	0.0002	0.2038	42	2.1	40.6	1.3	325	69	40.6	1.3	3.33333
PAK1_12.FIN2	292.8	0.9342	0.0399	0.0021	0.00644	0.00022	0.080704	39.7	2	41.4	1.4	341	63	41.4	1.4	4.28212

## Sheet: Table S2 HF1 and HF2
Table S2
Sample Name:								207/235		206/238		206/207		Best age
Grain #	[U] ppm	U/Th	207/235	2σ error	206/238	2σ error	RHO	Age Ma	2σ error	Age (Ma)	2σ error	Age (Ma)	2σ error	(Ma)	2σ error	% Discordance*
Pak1_1.FIN2	334.7	0.7807	0.045	0.0012	0.006824	9.7e-05	0.18627	44.6	1.2	43.84	0.62	184	33	43.84	0.62	1.70404
Pak1_2.FIN2	300.7	0.7963	0.0453	0.0015	0.00688	0.00011	0.18408	44.9	1.5	44.17	0.69	186	32	44.17	0.69	1.62584
Pak1_3.FIN2	289.6	0.7926	0.0471	0.0014	0.00699	0.0001	0.035673	46.7	1.4	44.91	0.67	204	31	44.91	0.67	3.83298
Pak1_4.FIN2	302.4	0.831	0.044	0.0012	0.0067	0.0001	0.13763	43.7	1.2	43.03	0.65	197	32	43.03	0.65	1.53318
Pak1_5.FIN2	311.4	0.7834	0.0455	0.0011	0.006986	9.7e-05	0.12222	45.1	1.1	44.88	0.62	158	25	44.88	0.62	0.487805
Pak1_6.FIN2	312.1	0.8049	0.045	0.0012	0.00684	0.00011	0.24591	44.6	1.1	43.97	0.7	154	32	43.97	0.7	1.41256
Pak1_7.FIN2	310.2	0.849	0.0442	0.0012	0.006767	9.4e-05	0.036326	43.9	1.2	43.47	0.6	160	33	43.47	0.6	0.979499
Pak1_8.FIN2	298.9	0.872	0.0426	0.0013	0.006733	9.6e-05	0.016019	42.3	1.3	43.26	0.62	169	32	43.26	0.62	2.2695
Pak1_9.FIN2	290	0.8646	0.0453	0.0013	0.00703	0.0001	0.17274	45	1.3	45.16	0.65	172	34	45.16	0.65	0.355556
HF1_1.FIN2	94.1	0.58	0.4967	0.0097	0.06637	0.00061	0.23118	409.2	6.6	414.3	3.7	368	22	414.3	3.7	1.24633
HF1_3.FIN2	188.8	2.69	5.13	0.072	0.3086	0.0045	0.95023	1840	12	1733	22	2046.8	5.6	2046.8	5.6	15.3312
HF1_6.FIN2	96.1	1.717	1.686	0.019	0.1716	0.0015	0.55941	1002.8	7.3	1020.7	8.1	963	11	963	11	5.99169
HF1_7.FIN2	54.5	0.963	1.827	0.021	0.1831	0.0018	0.45686	1055.8	7.9	1083.5	9.7	1000	13	1000	13	8.35
HF1_8.FIN2	85.4	2.002	7.112	0.04	0.4114	0.0026	0.67186	2125.3	5	2221	12	2037.1	5.4	2037.1	5.4	9.02754
HF1_9.FIN2	247	1.493	7.26	0.13	0.3909	0.0077	0.96413	2142	15	2126	36	2163.9	6.1	2163.9	6.1	1.75147
HF1_10.FIN2	111.4	0.805	4.216	0.038	0.3033	0.0013	0.078386	1676.9	7.3	1707.6	6.6	1638	14	1638	14	4.24908
HF1_11.FIN2	191.3	6.61	5.757	0.049	0.3635	0.0027	0.81006	1939.5	7.3	1998	13	1878.6	4.4	1878.6	4.4	6.3558
HF1_12.FIN2	415	8.11	1.8499	0.0099	0.1854	0.0011	0.40291	1063.3	3.5	1098.1	5.9	1004.9	8	1004.9	8	9.27455
HF1_13.FIN2	91.3	1.58	11.5	0.1	0.4681	0.0048	0.84561	2564	8.4	2475	21	2717.5	4.6	2717.5	4.6	8.92364
HF1_14.FIN2	119	1.419	0.938	0.013	0.1108	0.0012	0.60202	671.4	7	677.1	6.7	642	17	677.1	6.7	0.848972
HF1_15.FIN2	58.6	0.42	1.083	0.014	0.1212	0.0017	0.37488	744.5	6.9	737.5	9.7	882	20	737.5	9.7	0.940228
HF1_16.FIN2	85.6	0.702	4.52	0.031	0.3251	0.0022	0.70772	1734.4	5.6	1815	11	1640.1	5	1640.1	5	10.664
HF1_17.FIN2	174.6	0.933	3.484	0.036	0.2653	0.003	0.93333	1522.9	8.1	1516	15	1625.1	5.1	1625.1	5.1	6.71343
HF1_19.FIN2	212.7	1.24	1.737	0.012	0.1714	0.0014	0.53168	1022.2	4.5	1019.6	7.5	1030.8	8.1	1030.8	8.1	1.08653
HF1_21.FIN2	66.9	0.961	2.047	0.025	0.1905	0.0019	0.62454	1132.1	8.2	1124	10	1146	11	1146	11	1.91972
HF1_22.FIN2	298	2.98	2.175	0.024	0.2019	0.0017	0.6306	1173.5	7.6	1185.6	9.2	1151	12	1151	12	3.00608
HF1_23.FIN2	216	2.528	0.7816	0.0077	0.09545	0.00078	0.17406	586.3	4.3	587.7	4.6	579	12	587.7	4.6	0.238786
HF1_24.FIN2	38.5	1.235	1.325	0.02	0.1455	0.0012	0.3715	856	8.8	875.5	7	935	16	935	16	6.36364
HF1_26.FIN2	65.9	1.397	1.68	0.018	0.1664	0.0019	0.64084	1002.4	6.9	992	10	1155	11	1155	11	14.1126
HF1_27.FIN2	171.1	0.8	0.888	0.011	0.1042	0.001	0.51192	646.1	6	639	5.9	672	14	639	5.9	1.0989
HF1_28.FIN2	273	1.665	2.256	0.028	0.2092	0.0027	0.90545	1199.1	8.8	1224	15	1164.2	6.5	1164.2	6.5	5.13657
HF1_29.FIN2	189	2.62	5.107	0.057	0.3142	0.0039	0.90887	1836.6	9.5	1761	19	1924.6	4.7	1924.6	4.7	8.50047
HF1_30.FIN2	70.1	0.794	0.5236	0.0088	0.07009	0.00088	0.25927	427.3	5.9	436.6	5.3	491	23	436.6	5.3	2.17646
HF1_31.FIN2	78.4	0.763	9.209	0.068	0.4255	0.0039	0.77636	2358.6	6.8	2287	18	2514.3	5.8	2514.3	5.8	9.04029
HF1_32.FIN2	124.8	1.899	3.001	0.047	0.236	0.0037	0.90943	1407	12	1368	20	1663.2	6.5	1663.2	6.5	17.7489
HF1_33.FIN2	42.2	2.839	0.607	0.017	0.0791	0.002	0.58846	481	11	491	12	730	29	491	12	2.079
HF1_34.FIN2	97.6	1.86	1.844	0.029	0.1869	0.0023	0.75992	1062	10	1105	13	1248	11	1248	11	11.4583
HF1_35.FIN2	116	0.696	11.73	0.14	0.5208	0.0061	0.91607	2582	11	2702	26	2479.7	8.3	2479.7	8.3	8.96479
HF1_36.FIN2	171	1.118	2.679	0.045	0.2233	0.0043	0.83897	1321	12	1298	23	1370	10	1370	10	5.25547
HF1_37.FIN2	399	1.468	0.7745	0.0098	0.09543	0.00086	0.67437	582.1	5.6	587.6	5.1	563	12	587.6	5.1	0.944855
HF1_38.FIN2	118.3	1.434	0.456	0.014	0.0593	0.0011	0.51267	381	10	371.4	6.8	539	31	371.4	6.8	2.51969
HF1_39.FIN2	351	1.651	0.5461	0.0086	0.07017	0.00099	0.24291	442.4	5.6	437.2	6	471	29	437.2	6	1.17541
HF1_39.FIN2	350.1	1.243	1.129	0.016	0.1228	0.0019	0.67639	767.3	7.8	747	11	831	18	747	11	2.64564
HF1_40.FIN2	67.8	1.68	2.277	0.03	0.2088	0.0025	0.72603	1204.6	9.4	1222	13	1162	10	1162	10	5.16351
HF1_41.FIN2	30.67	0.8354	2.065	0.031	0.1919	0.0028	0.24677	1137	10	1131	15	1259	15	1259	15	10.1668
HF1_42.FIN2	57.1	1.008	2.387	0.025	0.216	0.0017	0.33785	1238.4	7.5	1260.5	8.8	1205.3	9.9	1205.3	9.9	4.57977
HF1_43.FIN2	155.2	1.043	1.667	0.018	0.165	0.0016	0.78951	997.3	6.7	984.6	8.9	1049.8	8.6	1049.8	8.6	6.21071
HF1_44.FIN2	155.1	2.1	0.7949	0.0095	0.09642	0.00059	0.15181	594.4	5.3	593.4	3.5	762	20	593.4	3.5	0.168237
HF1_45.FIN2	354	29.5	2.117	0.045	0.1964	0.0025	0.76474	1154	15	1156	14	1143	21	1143	21	1.13736
HF1_46.FIN2	131	2.2	0.5705	0.0072	0.07495	0.00096	0.53211	458.1	4.6	465.9	5.8	540	13	465.9	5.8	1.70269
HF1_48.FIN2	98.31	2.251	2.031	0.035	0.1956	0.0036	0.65503	1126	12	1151	20	1096	20	1096	20	5.01825
HF1_49.FIN2	46.9	1.178	1.593	0.024	0.1601	0.0018	0.42925	966.7	9.6	957	10	1084	15	1084	15	11.7159
HF1_50.FIN2	134.2	1.943	0.744	0.011	0.09111	0.00081	0.11865	564.4	6.5	562.1	4.8	575	19	562.1	4.8	0.407512
HF1_51.FIN2	323	1.332	0.4127	0.0048	0.05553	0.00041	0.20451	350.7	3.4	348.4	2.5	370	16	348.4	2.5	0.655831
HF1_52.FIN2	177	0.854	0.761	0.019	0.0896	0.0015	0.45845	574	11	553	9.1	646	28	553	9.1	3.65854
HF1_53.FIN2	416	2.22	0.8745	0.0076	0.10531	0.00083	0.66391	638.5	4	645.4	4.8	610.9	5.6	645.4	4.8	1.08066
HF1_54.FIN2	84.8	0.548	6.945	0.083	0.3514	0.0038	0.89023	2106	11	1941	18	2265	11	2265	11	14.3046
HF1_55.FIN2	55.2	0.706	11.52	0.15	0.4878	0.0073	0.91895	2565	12	2560	32	2653.5	5.2	2653.5	5.2	3.52365
HF1_56.FIN2	423	0.87	2.315	0.022	0.2122	0.0014	0.059582	1216.6	6.6	1240.4	7.7	1172	19	1172	19	5.83618
HF1_57.FIN2	129	1.048	19.22	0.45	0.642	0.016	0.98931	3049	25	3191	65	2963.4	5.5	2963.4	5.5	7.68037
HF1_58.FIN2	337	0.872	0.4181	0.0045	0.05559	0.00048	0.12987	354.6	3.2	348.8	3	400	21	348.8	3	1.63565
HF1_59.FIN2	54.2	1.31	0.912	0.013	0.1072	0.0012	0.020924	657.5	7.1	657.1	7	657	23	657.1	7	0.0608365
HF1_61.FIN2	223	1.442	1.894	0.024	0.1818	0.0021	0.64231	1079.4	8.1	1077	11	1071.8	9.3	1071.8	9.3	0.485165
HF1_63.FIN2	197.8	2.542	3.3	0.019	0.2641	0.0018	0.62931	1480.8	4.4	1510.9	9.3	1432.5	6.5	1432.5	6.5	5.47295
HF1_64.FIN2	102.3	0.5734	0.5867	0.0074	0.07685	0.00085	0.38054	468.6	4.7	477.2	5.1	541	15	477.2	5.1	1.83525
HF1_65.FIN2	137.5	0.803	0.739	0.017	0.0913	0.0016	0.58754	561.7	9.7	562.9	9.3	784	15	562.9	9.3	0.213637
HF1_66.FIN2	187.9	13.94	1.907	0.017	0.184	0.0015	0.73669	1084	6	1088.9	8.1	1077	9.3	1077	9.3	1.10492
HF1_67.FIN2	177	1.132	12.61	0.11	0.5265	0.0049	0.80102	2651.3	8.7	2726	21	2583.3	6	2583.3	6	5.52394
HF1_68.FIN2	167.2	1.532	0.6914	0.0098	0.0864	0.0011	0.71109	533.4	5.9	534.3	6.3	647.3	9.1	534.3	6.3	0.168729
HF1_69.FIN2	116	3.03	1.852	0.024	0.1829	0.0022	0.63632	1063.6	8.6	1084	12	1023	11	1023	11	5.96285
HF1_70.FIN2	205.1	2.69	3.621	0.026	0.28	0.0021	0.61191	1553.9	5.6	1591	11	1499.2	7	1499.2	7	6.12327
HF1_74.FIN2	144.2	3.037	0.93	0.014	0.107	0.0015	0.58308	667.2	7.6	655.1	8.9	678	17	655.1	8.9	1.81355
HF1_75.FIN2	117.8	1.12	1.745	0.02	0.1721	0.0021	0.57621	1024.9	7.3	1023	12	1135	10	1135	10	9.86784
HF1_76.FIN2	59.6	0.958	0.468	0.011	0.0614	0.001	0.19766	389.8	7.7	384.3	6.2	552	30	384.3	6.2	1.41098
HF1_77.FIN2	19.7	0.456	0.646	0.021	0.0853	0.0014	0.20595	505	13	527.7	8.4	644	51	527.7	8.4	4.49505
HF1_78.FIN2	34.5	0.827	5.203	0.069	0.3332	0.0039	0.62911	1854	11	1853	19	2073	11	2073	11	10.6126
HF1_79.FIN2	273	1.783	0.5242	0.007	0.06871	0.00066	0.4671	428.3	4.7	428.3	4	430	17	428.3	4	0
HF1_81.FIN2	66.6	0.5455	3.458	0.038	0.2641	0.0032	0.40508	1517.3	8.6	1511	16	1634	12	1634	12	7.52754
HF1_82.FIN2	201.2	7.28	1.16	0.031	0.1281	0.0021	0.79368	783	14	777	12	1012	21	777	12	0.766284
HF1_83.FIN2	47.4	27.8	1.133	0.023	0.1266	0.0032	0.36571	771	12	768	18	799	24	768	18	0.389105
HF1_84.FIN2	122	2.72	23.75	0.32	0.6366	0.009	0.94053	3257	13	3174	36	3386.8	4	3386.8	4	6.28322
HF1_85.FIN2	193.5	2.29	2.03	0.014	0.1774	0.0015	0.69193	1126.3	4.9	1052.4	8	1463.7	7.5	1463.7	7.5	28.1
HF1_86.FIN2	118.1	0.882	1.366	0.017	0.1433	0.0014	0.48278	874	7.3	863.1	7.9	1011	10	1011	10	14.6291
HF1_87.FIN2	129.1	0.608	0.4126	0.0064	0.05907	0.00077	0.42128	350.6	4.6	369.9	4.7	456	22	369.9	4.7	5.50485
HF1_88.FIN2	225	2.187	1.788	0.016	0.1785	0.0014	0.4193	1040.9	5.9	1058.7	7.9	995	11	995	11	6.40201
HF1_89.FIN2	255	2.145	2.28	0.019	0.2123	0.0017	0.61088	1206.6	5.8	1242.3	9	1138.9	7.4	1138.9	7.4	9.07894
HF1_90.FIN2	178	1.051	0.6985	0.0092	0.0886	0.0013	0.59293	537.7	5.5	547.2	7.8	605	15	547.2	7.8	1.76678
HF1_91.FIN2	151.1	1.159	1.054	0.01	0.1202	0.00099	0.38654	730.8	5.1	731.7	5.7	734	11	731.7	5.7	0.123153
HF1_92.FIN2	161	2.25	0.867	0.013	0.1056	0.0013	0.63233	633.3	6.8	647.3	7.5	579	15	647.3	7.5	2.21064
HF1_93.FIN2	85.6	0.823	2.641	0.027	0.2254	0.0022	0.60824	1311.7	7.5	1310	11	1389.3	8.6	1389.3	8.6	5.70791
HF1_94.FIN2	32.05	2.86	0.708	0.017	0.0889	0.0012	0.016667	543	10	549.2	6.9	694	29	549.2	6.9	1.1418
HF1_95.FIN2	44.9	1.879	2.041	0.051	0.1879	0.0031	0.69296	1128	17	1110	17	1156	23	1156	23	3.97924
HF1_96.FIN2	38.3	1.658	1.492	0.018	0.152	0.0022	0.54049	927.6	7.7	912	13	1071	15	1071	15	14.8459
HF1_97.FIN2	30.3	0.915	1.4	0.025	0.1495	0.0015	0.17013	888	11	898	8.5	1067	26	1067	26	15.8388
HF1_98.FIN2	247	1.28	1.144	0.021	0.1275	0.0013	0.1765	774	9.7	773.6	7.5	774	32	773.6	7.5	0.0516796
HF1_99.FIN2	135	1.62	14.17	0.16	0.5566	0.0058	0.85655	2761	10	2852	24	2694.3	8.8	2694.3	8.8	5.8531
HF1_100.FIN2	41.8	0.851	1.373	0.025	0.1449	0.0027	0.63173	876	11	872	15	975	17	975	17	10.5641
HF1_101.FIN2	117.2	1.26	1.779	0.017	0.1772	0.0019	0.38276	1038.5	6.5	1052	10	1013	13	1013	13	3.84995
HF1_102.FIN2	196	0.4815	0.6649	0.0089	0.08435	0.00094	0.11494	518.2	5.6	522	5.6	605	15	522	5.6	0.733308
HF1_103.FIN2	83.9	0.893	0.666	0.013	0.0862	0.0012	0.49576	517.7	8.2	532.9	7.1	657	18	532.9	7.1	2.93606
HF1_104.FIN2	107.9	0.655	0.5336	0.0081	0.07513	0.00082	0.34673	433.9	5.3	466.9	4.9	547	14	466.9	4.9	7.60544
HF1_105.FIN2	135.4	0.684	1.717	0.018	0.1772	0.0014	0.41653	1014.5	6.8	1051.5	7.9	1206	12	1206	12	12.8109
HF1_107.FIN2	103.3	0.589	1.559	0.018	0.1613	0.0015	0.52162	953.7	7.1	963.7	8.5	1042	13	1042	13	7.5144
HF1_108.FIN2	156.6	0.818	1.815	0.016	0.1763	0.0022	0.75827	1050.7	5.9	1046	12	1272.7	7.2	1272.7	7.2	17.8125
HF1_109.FIN2	15.03	1.227	1.254	0.028	0.1383	0.0029	0.41369	828	12	835	17	1033	27	835	17	0.845411
HF1_111.FIN2	67.4	1.602	1.364	0.018	0.1442	0.0021	0.58996	873.1	7.8	868	12	1008	14	1008	14	13.8889
HF1_112.FIN2	228	1.246	0.879	0.011	0.1014	0.0011	0.53402	639.9	6.1	622.4	6.6	691	15	622.4	6.6	2.7348
HF1_113.FIN2	151.5	0.589	0.5397	0.0062	0.07015	0.00062	0.23286	438.9	4.3	437.1	3.7	560	13	437.1	3.7	0.410116
HF1_114.FIN2	32.05	0.5287	2.631	0.043	0.2229	0.0037	0.42054	1309	12	1297	19	1522	18	1522	18	14.7832
HF1_115.FIN2	286.6	18.5	2.175	0.022	0.1743	0.0023	0.29119	1172.6	7.2	1036	13	1443	24	1443	24	28.2051
HF1_116.FIN2	134	1.221	1.708	0.02	0.1693	0.0019	0.72204	1011.2	7.7	1010	10	1135.1	8.2	1135.1	8.2	11.0211
HF1_117.FIN2	60.2	1.406	0.754	0.015	0.0962	0.0012	0.40081	571.4	8.1	592.2	6.9	715	22	592.2	6.9	3.64018
HF1_119.FIN2	55.4	1.687	2.316	0.041	0.2093	0.0027	0.6459	1216	13	1225	14	1210	18	1210	18	1.23967
HF1_120.FIN2	108.2	1.692	2.001	0.019	0.1924	0.0015	0.34574	1115.4	6.4	1134.4	8.3	1081	11	1081	11	4.93987
HF2_2.FIN2	153.8	1.224	1.648	0.017	0.1671	0.0016	0.45455	988.6	6.7	996.2	8.9	965	12	965	12	3.23316
HF2_3.FIN2	25.5	1.118	1.727	0.033	0.1724	0.0025	0.50505	1017	12	1025	14	1102	26	1102	26	6.9873
HF2_4.FIN2	136	2.06	13.2	0.15	0.5213	0.0053	0.84854	2695	11	2704	23	2689.9	7.9	2689.9	7.9	0.524183
HF2_5.FIN2	156	2.54	1.647	0.016	0.1704	0.0017	0.58311	988.2	6.2	1014.4	9.2	933	12	933	12	8.72454
HF2_6.FIN2	118.8	0.5411	0.6837	0.0076	0.08492	0.00076	0.11073	528.9	4.6	525.4	4.5	681	21	525.4	4.5	0.661751
HF2_7.FIN2	384	0.671	1.367	0.033	0.09123	0.00077	0.025939	873	14	562.8	4.5	1778	46	DISC	DISC	68.3465
HF2_8.FIN2	374	1.227	0.59	0.014	0.0735	0.0013	0.51739	470.7	9.1	457.2	7.7	532	28	457.2	7.7	2.86807
HF2_9.FIN2	113	1.84	8.49	0.06	0.372	0.0033	0.61313	2284.6	6.4	2039	15	2609.9	6.3	2609.9	6.3	21.8744
HF2_10.FIN2	181.6	5.07	0.544	0.014	0.0722	0.0015	0.46126	440.8	9	449.3	8.9	629	33	449.3	8.9	1.92831
HF2_11.FIN2	75.6	1.278	0.848	0.016	0.1017	0.0016	0.2349	624.9	8.8	624.2	9.4	626	30	624.2	9.4	0.112018
HF2_12.FIN2	96	12.3	0.586	0.026	0.0705	0.0019	0.77166	468	17	439	11	628	61	439	11	6.19658
HF2_12.FIN2	39.25	1.38	13.82	0.13	0.513	0.0049	0.58065	2737.1	8.8	2669	21	2818.7	8.9	2818.7	8.9	5.31096
HF2_13.FIN2	40	1.363	1.878	0.028	0.1805	0.0022	0.55575	1074	10	1070	12	1231	13	1231	13	13.0788
HF2_14.FIN2	57.2	0.647	2.292	0.027	0.2104	0.002	0.43247	1210.2	8.5	1231	11	1174	11	1174	11	4.8552
HF2_15.FIN2	200.7	0.7163	0.5353	0.0072	0.06995	0.00071	0.18215	435.2	4.8	435.9	4.3	550	21	435.9	4.3	0.160846
HF2_16.FIN2	196	5.4	2.218	0.074	0.2023	0.0054	0.59322	1194	21	1187	29	1227	39	1227	39	3.25998
HF2_17.FIN2	377	0.908	2.118	0.019	0.1965	0.0017	0.70812	1154.5	6.1	1156.6	9	1154.9	9.4	1154.9	9.4	0.147199
HF2_18.FIN2	254	10	0.5092	0.0054	0.06658	0.00051	0.35592	417.8	3.6	415.5	3.1	432	17	415.5	3.1	0.550503
HF2_19.FIN2	26.1	0.955	1.534	0.025	0.1587	0.0025	0.38587	943.1	9.9	949	14	1017	24	1017	24	6.68633
HF2_21.FIN2	74.6	3.13	1.75	0.016	0.1725	0.0016	0.43054	1026.8	5.8	1025.8	8.8	1153	12	1153	12	11.0321
HF2_22.FIN2	211	1.458	1.586	0.012	0.1613	0.0015	0.54312	964.4	4.8	964.1	8.4	1173.3	8.7	1173.3	8.7	17.8301
HF2_24.FIN2	349	1.549	1.994	0.023	0.1934	0.0026	0.721	1113.2	7.9	1139	14	1070	13	1070	13	6.4486
HF2_25.FIN2	313	1.762	1.261	0.024	0.1359	0.0025	0.92296	827	11	821	14	964	9.5	821	14	0.725514
HF2_26.FIN2	153	1.3	0.5161	0.009	0.06807	0.00064	0.41111	423.9	6.3	424.5	3.8	423	18	424.5	3.8	0.141543
HF2_27.FIN2	50.5	1.273	1.541	0.019	0.1595	0.0018	0.46807	946.2	7.6	954	10	1028	15	1028	15	7.19844
HF2_28.FIN2	94.9	1.138	1.611	0.023	0.1554	0.0021	0.56992	974	8.9	931	12	1106	13	1106	13	15.8228
HF2_30.FIN2	103	1.277	2.369	0.024	0.2167	0.0017	0.35982	1233.1	7.2	1264.2	9	1180	12	1180	12	7.13559
HF2_31.FIN2	107.2	0.722	0.4425	0.008	0.06061	0.00072	0.29133	371.8	5.6	379.3	4.4	451	23	379.3	4.4	2.01721
HF2_32.FIN2	131.6	0.358	1.431	0.02	0.1512	0.0024	0.72468	901.7	8.2	907	14	1083	11	1083	11	16.2512
HF2_33.FIN2	166	1.165	3.45	0.028	0.2777	0.0024	0.67975	1516.5	6.2	1580	12	1429.7	7	1429.7	7	10.5127
HF2_34.FIN2	79.1	1.421	1.937	0.018	0.1849	0.0019	0.45736	1093.8	6.2	1094	10	1209.2	8.7	1209.2	8.7	9.52696
HF2_35.FIN2	515	9.44	0.5169	0.0045	0.0677	0.0031	0.41119	423.1	3	422	19	457	33	422	19	0.259986
HF2_35.FIN2	94.3	2.223	2.355	0.027	0.2146	0.0028	0.67867	1228.8	8.1	1253	15	1188	11	1188	11	5.47138
HF2_36.FIN2	117.1	0.777	0.78	0.017	0.0769	0.0012	0.5313	584.4	9.6	477.5	7.1	1040	47	DISC	DISC	54.0865
HF2_38.FIN2	31.9	0.7586	4.413	0.048	0.3166	0.0028	0.3864	1714.2	9	1773	14	1654	11	1654	11	7.19468
HF2_39.FIN2	582	12.72	0.8237	0.0073	0.10128	0.00092	0.63654	610.5	4	621.9	5.4	571	11	621.9	5.4	1.86732
HF2_40.FIN2	209	1.264	4.251	0.064	0.2749	0.0043	0.87423	1683	12	1565	22	1843.4	8.3	1843.4	8.3	15.1025
HF2_41.FIN2	99.7	0.3732	0.677	0.011	0.0859	0.0013	0.22714	524.5	6.8	531.5	8	624	24	531.5	8	1.3346
HF2_42.FIN2	66.2	1.428	1.536	0.03	0.1578	0.0025	0.72694	943	12	944	14	1129	16	1129	16	16.3862
HF2_44.FIN2	264	2.32	1.47	0.03	0.1476	0.0027	0.9034	919	13	887	15	992	13	992	13	10.5847
HF2_45.FIN2	304	2.393	4.483	0.056	0.2598	0.0029	0.74557	1727	10	1489	15	2029.3	8.3	2029.3	8.3	26.6249
HF2_46.FIN2	246	1.861	3.292	0.038	0.247	0.0037	0.95834	1478.9	9	1423	19	1585	10	1585	10	10.2208
HF2_48.FIN2	45.5	0.876	2.682	0.035	0.2489	0.0036	0.52585	1323	9.8	1432	19	1198	20	1198	20	19.5326
HF2_49.FIN2	11.55	0.166	11.57	0.19	0.481	0.006	0.47759	2571	15	2531	26	2725	12	2725	12	7.11927
HF2_50.FIN2	154.7	2.81	4.181	0.037	0.3068	0.0024	0.70895	1671.1	7	1727	12	1603.8	7.2	1603.8	7.2	7.68176
HF2_51.FIN2	101.6	1.367	3.653	0.035	0.285	0.0025	0.56746	1560.6	7.7	1616	12	1496	11	1496	11	8.02139
HF2_52.FIN2	184	3.52	0.444	0.015	0.0598	0.0019	0.88195	372	10	375	12	465	21	375	12	0.806452
HF2_53.FIN2	128	2.75	1.87	0.049	0.1814	0.0028	0.83887	1068	17	1076	15	1057	25	1057	25	1.79754
HF2_55.FIN2	102.3	1.48	1.693	0.019	0.1765	0.0021	0.75111	1005.6	7.3	1048	11	1140.9	9.5	1140.9	9.5	8.14269
HF2_56.FIN2	66.7	0.624	7.172	0.075	0.4034	0.0039	0.59878	2132.2	9.3	2184	18	2093.5	8.8	2093.5	8.8	4.3229
HF2_57.FIN2	53.4	1.352	1.485	0.022	0.1529	0.0019	0.42797	923.7	9.1	917	11	1050	15	1050	15	12.6667
HF2_58.FIN2	259	6.7	0.6235	0.0069	0.07905	0.00095	0.44267	491.9	4.3	490.4	5.7	502	15	490.4	5.7	0.30494
HF2_59.FIN2	175.9	1.941	3.462	0.035	0.252	0.0031	0.75732	1518.3	8	1448	16	1702.5	7.9	1702.5	7.9	14.9486
HF2_60.FIN2	578	5.59	0.853	0.026	0.0958	0.0023	0.01852	626	14	589	14	732	67	589	14	5.91054
HF2_60.FIN2	87.9	0.5245	5.308	0.065	0.3259	0.0039	0.49979	1870	10	1818	19	1929	11	1929	11	5.75428
HF2_61.FIN2	93.9	1.363	2.453	0.025	0.2137	0.0021	0.30295	1258.1	7.3	1248	11	1386	11	1386	11	9.95671
HF2_62.FIN2	222.6	1.395	2.594	0.041	0.2234	0.0038	0.87125	1298	12	1303	21	1472.4	8.3	1472.4	8.3	11.505
HF2_63.FIN2	414	1.376	1.935	0.012	0.1872	0.0013	0.70654	1093.2	4.1	1106.4	6.9	1062.9	6.2	1062.9	6.2	4.09258
HF2_64.FIN2	6.51	54	3.64	0.12	0.2582	0.0055	0.23445	1565	25	1480	28	1792	32	1792	32	17.4107
HF2_65.FIN2	739	2.317	0.7852	0.0044	0.09495	0.00057	0.48468	588.4	2.5	584.7	3.4	598.4	8.5	584.7	3.4	0.628824
HF2_66.FIN2	114.3	1.229	0.4788	0.0096	0.0654	0.001	0.39348	397	6.6	408.4	6.1	441	22	408.4	6.1	2.87154
HF2_67.FIN2	62.2	0.819	1.371	0.023	0.1479	0.0022	0.49795	876	9.7	889	12	1064	17	1064	17	16.4474
HF2_68.FIN2	135.3	0.884	0.95	0.015	0.1106	0.0018	0.49371	678	7.7	676	11	714	18	676	11	0.294985
HF2_69.FIN2	225	0.4825	2.363	0.02	0.21	0.0018	0.56124	1231.3	6	1228.6	9.7	1349.3	7.6	1349.3	7.6	8.94538
HF2_70.FIN2	76.6	1.13	2.037	0.02	0.1854	0.0017	0.194	1127.5	6.6	1097.6	9.2	1217	10	1217	10	9.81101
HF2_71.FIN2	107	1.119	2.808	0.027	0.242	0.0022	0.60371	1357.2	7.1	1397	11	1291.1	9.1	1291.1	9.1	8.20231
HF2_72.FIN2	55.8	1.347	1.969	0.03	0.1908	0.002	0.33465	1101.7	9.3	1125	11	1053	24	1053	24	6.83761
HF2_73.FIN2	257	1.531	1.908	0.016	0.188	0.0015	0.5934	1083.8	5.5	1110.4	7.9	1030.4	6.3	1030.4	6.3	7.76398
HF2_75.FIN2	279	2.59	2.579	0.032	0.2262	0.0026	0.63802	1295.1	8.9	1314	14	1267	12	1267	12	3.70955
HF2_76.FIN2	164	1.047	1.665	0.017	0.1524	0.0022	0.37917	994.9	6.6	914	13	1186	22	1186	22	22.9342
HF2_77.FIN2	200	0.559	0.7547	0.0087	0.09322	0.00082	0.33777	570.7	5	574.5	4.8	568	14	574.5	4.8	0.665849
HF2_78.FIN2	78.9	1.957	1.524	0.019	0.1582	0.0018	0.51425	939.6	7.7	946	10	1019	18	1019	18	7.16389
HF2_79.FIN2	141.1	1.701	3.848	0.03	0.2866	0.0022	0.40375	1602.8	6.3	1625	11	1574.8	6.6	1574.8	6.6	3.18771
HF2_80.FIN2	146.8	1.138	0.5132	0.0079	0.0682	0.00066	0.17431	420.4	5.3	425.3	4	394	21	425.3	4	1.16556
HF2_81.FIN2	92.9	0.4494	0.978	0.017	0.1128	0.0012	0.052218	692.1	8.5	688.7	7.1	705	31	688.7	7.1	0.491258
HF2_84.FIN2	133.4	1.353	2.903	0.026	0.2398	0.0022	0.55184	1382.4	6.8	1386	12	1365	11	1365	11	1.53846
HF2_85.FIN2	87.5	0.714	0.489	0.013	0.0639	0.0013	0.46206	405.9	9.4	399.3	8.1	544	31	399.3	8.1	1.62602
HF2_86.FIN2	77	0.798	3.564	0.029	0.2719	0.0028	0.65338	1543.1	6.5	1550	14	1648.9	9.8	1648.9	9.8	5.99794
HF2_87.FIN2	99.6	1.2	3.469	0.046	0.2593	0.003	0.50064	1519	10	1486	15	1567	14	1567	14	5.16911
HF2_88.FIN2	246.2	1.084	3.922	0.027	0.2998	0.0025	0.63646	1617.9	5.6	1690	13	1518.9	7.9	1518.9	7.9	11.2647
HF2_89.FIN2	145	0.76	6.162	0.04	0.3874	0.0024	0.5529	1999.6	5.5	2111	11	1891.4	6.2	1891.4	6.2	11.6104
HF2_90.FIN2	123.6	1.17	0.663	0.01	0.0851	0.0012	0.75405	516.6	5.9	526.3	7	600	14	526.3	7	1.87766
HF2_92.FIN2	53.6	0.817	1.339	0.017	0.148	0.0016	0.26216	862.3	7.6	889.8	9	1007	14	1007	14	11.6385
HF2_94.FIN2	64.8	1.881	1.686	0.025	0.1725	0.0024	0.57349	1003.7	9.2	1025	13	1093	15	1093	15	6.22141
HF2_95.FIN2	24.73	0.7084	3.376	0.046	0.2704	0.0032	0.018529	1498	11	1543	16	1611	15	1611	15	4.22098
HF2_96.FIN2	42.9	0.664	1.042	0.02	0.1197	0.0016	0.5261	724	10	729	9.4	827	19	729	9.4	0.690608
HF2_97.FIN2	177.1	0.377	0.6445	0.0071	0.0853	0.001	0.62693	505.6	4.5	527.4	6.1	633	14	527.4	6.1	4.31171
HF2_98.FIN2	167.3	0.809	3.987	0.046	0.2806	0.0032	0.83661	1631.1	9.4	1594	16	1910.2	6.7	1910.2	6.7	16.5532
HF2_99.FIN2	175.9	1.478	6.244	0.04	0.39	0.0026	0.24889	2011.4	5.7	2123	12	1892.8	6.5	1892.8	6.5	12.1619
HF2_100.FIN2	45.5	1.014	5.642	0.08	0.3132	0.0037	0.48498	1922	12	1756	18	2196	13	2196	13	20.0364
HF2_101.FIN2	56.7	2.137	1.541	0.044	0.1591	0.0037	0.55234	944	18	951	21	1131	20	1131	20	15.9151
HF2_102.FIN2	10.47	0.418	0.675	0.019	0.0933	0.002	0.16894	522	11	575	12	595	40	DISC	DISC	3.36134
HF2_103.FIN2	213	0.831	1.225	0.023	0.1323	0.0017	0.59775	812	10	801.1	9.8	848	14	801.1	9.8	1.34236
HF2_104.FIN2	156.7	1.611	1.468	0.017	0.1536	0.0018	0.70854	917.8	6.9	921	10	1015.7	8.5	1015.7	8.5	9.32362
HF2_105.FIN2	322	1.313	2.006	0.023	0.188	0.0026	0.39343	1117.4	7.8	1110	14	1116	19	1116	19	0.537634
HF2_106.FIN2	131	0.702	3.655	0.027	0.2735	0.0021	0.62254	1561.4	6	1558	11	1671.1	7.4	1671.1	7.4	6.768
HF2_107.FIN2	126.6	0.857	23.58	0.14	0.6831	0.0063	0.71007	3251	6	3356	24	3183	5.8	3183	5.8	5.43512
HF2_109.FIN2	29	0.312	6.426	0.08	0.3994	0.0043	0.33911	2035	11	2166	20	1909	13	1909	13	13.4625
HF2_110.FIN2	154.1	0.516	4.022	0.028	0.2951	0.002	0.57411	1638.4	5.6	1667.1	9.7	1611.7	7.7	1611.7	7.7	3.43736
HF2_111.FIN2	285	0.74	0.609	0.013	0.07254	0.00067	0.18623	482.3	8.5	451.4	4	614	46	451.4	4	6.4068
HF2_113.FIN2	437	14	0.7764	0.0097	0.0964	0.0011	0.56432	583.3	5.6	594.3	6	553	15	594.3	6	1.88582
HF2_114.FIN2	132.2	1.089	4.579	0.04	0.3207	0.0025	0.62599	1745	7.3	1793	12	1693.2	9.8	1693.2	9.8	5.89416
HF2_115.FIN2	36.44	0.71	1.176	0.036	0.1356	0.0026	0.42869	789	17	819	15	829	30	819	15	3.80228
HF2_116.FIN2	217	1.452	5.718	0.072	0.323	0.0036	0.73315	1934	11	1804	17	2085.8	8.5	2085.8	8.5	13.5104
HF2_118.FIN2	39.8	1.42	1.489	0.026	0.1554	0.0021	0.43424	925	11	931	12	1018	17	1018	17	8.54617
HF2_119.FIN2	42.5	0.874	10.96	0.12	0.4621	0.0058	0.6957	2519	10	2452	25	2746.1	9.5	2746.1	9.5	10.7097
HF2_120.FIN2	57.4	1.062	1.907	0.026	0.1837	0.0021	0.50141	1082.7	9	1087	12	1072	15	1072	15	1.39925
GJ1_1.FIN2	285.3	34.96	0.824	0.007	0.09929	0.00086	0.51643	610.1	3.9	610.2	5	610	10	610.2	5	0.0163908
GJ1_2.FIN2	296.2	33.94	0.8123	0.0066	0.09758	0.0007	0.41414	603.6	3.7	600.2	4.1	604	11	600.2	4.1	0.563287
GJ1_3.FIN2	295.2	34.04	0.8082	0.0059	0.09764	0.00066	0.46185	601.3	3.3	600.5	3.9	604	11	600.5	3.9	0.133045
GJ1_4.FIN2	298.8	34.06	0.7991	0.0054	0.09632	0.00061	0.35866	596.6	3.1	592.8	3.6	613	10	592.8	3.6	0.636943
GJ1_5.FIN2	291.9	34.19	0.8052	0.0059	0.09771	0.00062	0.30141	599.7	3.3	601	3.6	592	11	601	3.6	0.216775
GJ1_6.FIN2	279.4	34.54	0.8115	0.0067	0.09722	0.00066	0.39648	603.2	3.7	598.1	3.9	623	12	598.1	3.9	0.845491
GJ1_7.FIN2	286.2	34.56	0.8032	0.0066	0.09739	0.00075	0.3946	598.5	3.7	599	4.4	597.2	9.2	599	4.4	0.0835422
GJ1_8.FIN2	284.9	34.76	0.8051	0.0055	0.09684	0.0007	0.43731	599.6	3.1	595.9	4.1	611.4	9.1	595.9	4.1	0.617078
GJ1_9.FIN2	279.4	34.25	0.8091	0.0058	0.09791	0.00078	0.38706	601.8	3.2	602.1	4.6	598	11	602.1	4.6	0.0498504
GJ1_10.FIN2	295.5	33.66	0.8191	0.0053	0.09899	0.00054	0.2802	607.5	2.9	608.5	3.2	603	10	608.5	3.2	0.164609
GJ1_11.FIN2	288.4	33.87	0.8083	0.0056	0.09736	0.00056	0.46806	601.4	3.1	598.9	3.3	613.8	8.5	598.9	3.3	0.415697
GJ1_12.FIN2	278.7	34.07	0.7977	0.0066	0.09646	0.0007	0.54903	595.4	3.7	593.6	4.1	606.5	9.3	593.6	4.1	0.302318
GJ1_13.FIN2	281.4	33.89	0.8215	0.006	0.09921	0.00071	0.18251	608.8	3.3	609.8	4.2	612.2	9.7	609.8	4.2	0.164258
GJ1_14.FIN2	287.3	34.04	0.8091	0.0065	0.09787	0.00062	0.41222	601.9	3.6	601.9	3.7	612	10	601.9	3.7	0
GJ1_15.FIN2	279.5	34.52	0.8137	0.006	0.09722	0.00067	0.16797	604.4	3.4	598.1	3.9	627.9	9.9	598.1	3.9	1.04236
GJ1_16.FIN2	290.6	33.97	0.811	0.0067	0.09791	0.00068	0.49505	603.4	3.7	602.1	4	615.6	8.7	602.1	4	0.215446
GJ1_17.FIN2	290.4	34.27	0.8069	0.0061	0.09785	0.00067	0.40572	601	3.5	601.8	3.9	600.4	9.2	601.8	3.9	0.133111
GJ1_18.FIN2	286.3	34.32	0.802	0.0062	0.09726	0.00063	0.41211	597.9	3.5	598.3	3.7	602.6	8	598.3	3.7	0.0669008
GJ1_19.FIN2	293.6	34.12	0.811	0.0062	0.09752	0.00061	0.41892	602.9	3.5	599.8	3.6	606	11	599.8	3.6	0.514181
GJ1_20.FIN2	283	33.53	0.8072	0.0066	0.09753	0.00077	0.64848	600.8	3.7	599.9	4.5	610.1	8.8	599.9	4.5	0.1498
GJ1_21.FIN2	292.9	34.57	0.8126	0.0057	0.09771	0.00065	0.41401	603.8	3.2	601	3.8	612.5	8.7	601	3.8	0.46373
GJ1_22.FIN2	258	33.38	0.8158	0.0075	0.09823	0.00082	0.50855	605.5	4.2	604	4.8	606	12	604	4.8	0.247729
GJ1_23.FIN2	284.5	34.13	0.8083	0.0072	0.09759	0.00074	0.17428	601.4	4	600.2	4.3	607	12	600.2	4.3	0.199534
GJ1_24.FIN2	286.5	34.92	0.8033	0.0065	0.09622	0.00078	0.34563	598.6	3.7	592.2	4.6	623	11	592.2	4.6	1.06916
GJ1_25.FIN2	279.4	34.51	0.8073	0.0072	0.09779	0.0007	0.27668	600.8	4.1	601.4	4.1	604	12	601.4	4.1	0.0998668
GJ1_26.FIN2	280.5	33.93	0.8158	0.0058	0.0975	0.00068	0.39788	605.6	3.3	599.7	4	622.9	9.1	599.7	4	0.97424
GJ1_27.FIN2	286.3	34.05	0.8046	0.0066	0.09662	0.00069	0.43029	599.3	3.7	594.6	4.1	612	12	594.6	4.1	0.784248
GJ1_28.FIN2	281.9	34.19	0.8025	0.0071	0.09645	0.00081	0.36088	598.1	4	594.2	4.9	610	10	594.2	4.9	0.652065
GJ1_29.FIN2	289.1	34.1	0.8107	0.0068	0.09766	0.00079	0.42794	602.7	3.8	600.6	4.6	610.1	9.4	600.6	4.6	0.348432
GJ1_30.FIN2	286.3	34.29	0.8034	0.0067	0.09776	0.00078	0.38794	598.6	3.8	601.3	4.6	592.9	9.7	601.3	4.6	0.451052
GJ1_31.FIN2	281.9	34.5	0.8125	0.0061	0.09803	0.00071	0.38931	603.7	3.4	602.9	4.2	611.5	9.8	602.9	4.2	0.132516
GJ1_32.FIN2	281.7	34.53	0.818	0.0073	0.09904	0.00087	0.53862	607.3	4	608.8	5.1	612.6	9.7	608.8	5.1	0.246995
GJ1_33.FIN2	270.2	34.26	0.8063	0.0065	0.09752	0.00082	0.44588	600.3	3.6	599.8	4.8	605	11	599.8	4.8	0.0832917
GJ1_34.FIN2	280.5	33.88	0.8081	0.0069	0.0975	0.0007	0.39044	601.7	3.8	599.7	4.1	611	12	599.7	4.1	0.332392
GJ1_35.FIN2	293.7	33.57	0.8077	0.0059	0.09781	0.00064	0.40004	601.5	3.4	601.5	3.7	599.4	8.8	601.5	3.7	0
GJ1_36.FIN2	289.9	34.41	0.8127	0.005	0.09798	0.0007	0.11375	603.9	2.8	602.6	4.1	624	12	602.6	4.1	0.215267
GJ1_37.FIN2	288.2	34.03	0.8101	0.0053	0.09775	0.00056	0.027912	602.5	3	601.2	3.3	610.5	9.5	601.2	3.3	0.215768
GJ1_38.FIN2	296.7	34.58	0.8087	0.0062	0.09771	0.0008	0.20098	601.6	3.5	600.9	4.7	611	14	600.9	4.7	0.116356
GJ1_39.FIN2	288.8	34.39	0.8144	0.0073	0.09782	0.00071	0.36133	604.8	4.1	601.6	4.2	617	11	601.6	4.2	0.529101
GJ1_40.FIN2	293.6	34.22	0.8067	0.0067	0.09797	0.0006	0.42996	600.5	3.7	602.5	3.5	609	9.4	602.5	3.5	0.333056
GJ1_41.FIN2	292.8	34.35	0.8056	0.0064	0.09751	0.0006	0.26707	599.9	3.6	599.8	3.5	608	11	599.8	3.5	0.0166694
GJ1_42.FIN2	291.1	33.75	0.8021	0.0073	0.09682	0.00072	0.44488	598.4	4.2	595.7	4.3	597	11	595.7	4.3	0.451203
GJ1_43.FIN2	292.6	34.18	0.8101	0.007	0.09806	0.00071	0.31339	603.3	3.8	603	4.2	603	11	603	4.2	0.0497265
GJ1_44.FIN2	294.8	33.61	0.8093	0.0069	0.0975	0.00065	0.43872	601.9	3.9	599.7	3.8	613	9.6	599.7	3.8	0.365509
GJ1_45.FIN2	296.9	34.12	0.817	0.006	0.09793	0.00068	0.16043	606.3	3.4	602.2	4	623	11	602.2	4	0.676233
GJ1_46.FIN2	285.4	34.7	0.8071	0.0071	0.09752	0.00069	0.31389	601.2	3.9	599.8	4	620	12	599.8	4	0.232868
GJ1_47.FIN2	287.7	34.34	0.8123	0.006	0.09746	0.00083	0.43971	603.7	3.4	599.5	4.9	617	11	599.5	4.9	0.69571
GJ1_48.FIN2	283.8	34.69	0.8067	0.0074	0.09761	0.00063	0.25556	600.4	4.1	600.4	3.7	606	13	600.4	3.7	0
GJ1_50.FIN2	286.3	34.27	0.8133	0.0069	0.09675	0.00082	0.3619	604.8	4	595.3	4.8	634	13	595.3	4.8	1.57077
GJ1_51.FIN2	286.4	33.61	0.8075	0.0052	0.09704	0.00074	0.2762	601	2.9	597	4.4	624	11	597	4.4	0.665557
GJ1_52.FIN2	282	34.37	0.8036	0.0071	0.0977	0.0008	0.33573	598.7	4	600.9	4.7	603	14	600.9	4.7	0.367463
GJ1_53.FIN2	282.6	33.19	0.811	0.0069	0.09699	0.00082	0.4403	602.9	3.9	596.7	4.8	622.4	9.2	596.7	4.8	1.02836
GJ1_54.FIN2	281.6	34.11	0.8056	0.0067	0.09714	0.00081	0.45245	599.8	3.8	597.6	4.8	607	11	597.6	4.8	0.366789
GJ1_55.FIN2	281.1	34.17	0.7966	0.0074	0.09732	0.00072	0.39358	595.2	4.2	598.7	4.3	581	12	598.7	4.3	0.588038
GJ1_56.FIN2	278.6	34.82	0.8116	0.0072	0.0985	0.001	0.46935	603.2	4	605.7	5.9	599.2	8.8	605.7	5.9	0.414456
GJ1_57.FIN2	278.5	36.43	0.8289	0.0083	0.09925	0.00099	0.48824	612.8	4.6	609.9	5.8	626	10	609.9	5.8	0.473238
GJ1_58.FIN2	289.5	34.23	0.8141	0.0074	0.09752	0.0008	0.28988	604.6	4.1	599.8	4.7	617	11	599.8	4.7	0.793913
GJ1_59.FIN2	295.4	33.94	0.8152	0.0068	0.09836	0.00074	0.25034	605.3	3.8	604.7	4.4	614	15	604.7	4.4	0.0991244
GJ1_60.FIN2	298.1	33.96	0.8099	0.0067	0.09786	0.00069	0.4725	602.7	3.8	601.8	4	614	9.2	601.8	4	0.149328
GJ1_61.FIN2	293	33.48	0.7992	0.0066	0.09701	0.0007	0.41717	596.2	3.7	596.9	4.1	598	10	596.9	4.1	0.11741

## Sheet: Table S3 WCSS2
Table S3
Sample Name:								207/235		206/238		207/206		Best age
Grain #	[U] ppm	U/Th	207/235	2σ error	206/238	2σ error	RHO	Age Ma	2σ error	Age (Ma)	2σ error	Age (Ma)	2σ error	(Ma)	2σ error	% Discordance*	Rim/Core
Plesovice1_1.FIN2	522	7.12	0.3927	0.0054	0.05401	0.00038	0.16772	336.1	3.9	339.1	2.3	324	32	339.1	2.3	0.892591
Plesovice1_2.FIN2	523	7.13	0.3969	0.006	0.05477	0.00039	0.25977	339.6	4.5	343.7	2.4	338	34	343.7	2.4	1.2073
Plesovice1_3.FIN2	534	7.3	0.4021	0.0058	0.05358	0.00045	0.4191	342.8	4.2	336.4	2.8	377	30	336.4	2.8	1.86698
Plesovice1_4.FIN2	440	7.54	0.405	0.0058	0.05325	0.00039	0.23473	344.9	4.2	334.5	2.4	368	34	334.5	2.4	3.01537
Plesovice1_5.FIN2	552	7.43	0.3978	0.0058	0.05359	0.00034	0.30331	340.3	4.3	336.5	2.1	379	32	336.5	2.1	1.11666
Plesovice1_6.FIN2	514	7.055	0.3976	0.0054	0.0537	0.00033	0.11591	339.6	3.9	337.2	2	338	33	337.2	2	0.706714
Plesovice1_7.FIN2	504	6.331	0.389	0.0055	0.05323	0.0004	0.023967	333.4	4.1	334.3	2.5	327	36	334.3	2.5	0.269946
Plesovice1_8.FIN2	557	7.11	0.3934	0.0062	0.05354	0.00037	0.25414	336.5	4.5	336.2	2.3	307	34	336.2	2.3	0.089153
Plesovice1_9.FIN2	556	7.2	0.4042	0.0049	0.05329	0.00036	0.18974	344.4	3.5	334.7	2.2	344	28	334.7	2.2	2.81649
Plesovice1_10.FIN2	555	7.26	0.4136	0.0057	0.05441	0.00036	0.14369	351.1	4.1	341.5	2.2	354	32	341.5	2.2	2.73426
Plesovice1_11.FIN2	590	7.286	0.3956	0.0054	0.05349	0.00031	0.28532	338.2	3.9	335.9	1.9	331	30	335.9	1.9	0.680071
Plesovice1_12.FIN2	454	7.03	0.404	0.0058	0.05363	0.00043	0.2717	344.2	4.2	336.7	2.6	388	32	336.7	2.6	2.17897
0	0	0	0	0	0	0	0	0	0	0	0	0	0	#DIV/0!	#DIV/0!	#DIV/0!
WCSS2_1.FIN2	254	2.106	1.701	0.031	0.1693	0.0028	0.34449	1008	12	1008	16	1071	43	1071	43	5.88235
WCSS2_2.FIN2	540	1.72	0.723	0.017	0.0903	0.0012	0.45229	552	10	557.2	6.9	590	43	557.2	6.9	0.942029
WCSS2_3.FIN2	219	1.748	1.979	0.028	0.1872	0.0017	0.31948	1108.5	9.3	1106	9.1	1129	29	1129	29	2.0372
WCSS2_4.FIN2	88.3	0.669	10.83	0.1	0.4762	0.0042	0.52614	2507.9	9	2510	18	2509	15	2509	15	0.0398565
WCSS2_5.FIN2	19.23	-1.4	0.698	0.05	0.0889	0.0018	0.035156	526	30	549	11	390	140	549	11	4.37262
WCSS2_6.FIN2	348	0.5219	0.908	0.011	0.10323	0.00079	0.35474	655.5	5.7	633.2	4.6	684	23	633.2	4.6	3.40198
WCSS2_7.FIN2	437	15.1	0.946	0.021	0.1097	0.002	0.30115	675	11	671	11	640	52	671	11	0.592593	Rim
WCSS2_7.FIN2	183.9	0.762	2.124	0.048	0.1836	0.003	0.56397	1155	16	1086	16	1237	35	1237	35	12.207	Core
WCSS2_8.FIN2	431	5.07	1.211	0.021	0.1187	0.0013	0.68542	804.2	9.9	722.9	7.6	970	26	722.9	7.6	10.1094
WCSS2_9.FIN2	170.9	0.6245	0.784	0.02	0.0925	0.0012	0.34355	587	11	570.2	7.2	580	52	570.2	7.2	2.86201	Rim
WCSS2_9.FIN2	120.5	0.861	0.863	0.027	0.0996	0.0017	0.38126	630	15	612	10	613	65	612	10	2.85714	Core
WCSS2_10.FIN2	221.9	1.061	0.883	0.013	0.10206	0.0007	0.23244	641.9	6.9	626.4	4.1	633	32	626.4	4.1	2.41471
WCSS2_11.FIN2	61.7	2.77	10.19	0.14	0.4087	0.0049	0.51926	2450	13	2208	22	2603	21	2603	21	15.1748
WCSS2_12.FIN2	64.5	1.326	0.734	0.03	0.0892	0.0014	0.24553	555	17	550.6	8.3	513	81	550.6	8.3	0.792793
WCSS2_13.FIN2	174	4.75	0.688	0.013	0.08577	0.00085	0.048526	530.7	8.1	530.4	5.1	494	49	530.4	5.1	0.0565291
WCSS2_14.FIN2	66	9.2	0.689	0.042	0.0853	0.0028	0.37978	531	27	527	17	520	130	527	17	0.753296	Rim
WCSS2_14.FIN2	111.1	2.74	2.83	0.11	0.2223	0.005	0.55476	1359	30	1294	27	1459	65	1459	65	11.3091	Core
WCSS2_15.FIN2	30	1.35	2.485	0.082	0.2163	0.0038	0.26479	1268	24	1261	20	1260	63	1260	63	0.0793651
WCSS2_16.FIN2	16.09	1.41	0.751	0.053	0.0909	0.0022	0.19547	553	31	560	13	510	140	560	13	1.26582
WCSS2_17.FIN2	80.7	0.767	0.79	0.023	0.0956	0.0013	0.49505	588	13	588.3	7.7	584	56	588.3	7.7	0.0510204
WCSS2_18.FIN2	100	1.169	1.818	0.043	0.1776	0.0019	0.099279	1052	16	1056	11	1043	50	1043	50	1.2464
WCSS2_19.FIN2	98.8	0.978	8.68	0.14	0.3726	0.0051	0.72712	2302	15	2040	24	2547	20	2547	20	19.9058
WCSS2_20.FIN2	79.4	1.38	2.083	0.047	0.1964	0.0018	0.20982	1143	16	1155.6	9.7	1103	44	1103	44	4.76881
WCSS2_21.FIN2	35.3	0.902	1.86	0.053	0.1794	0.0029	0.24897	1063	19	1063	16	1045	62	1045	62	1.72249
WCSS2_22.FIN2	103.5	1.204	0.865	0.025	0.1023	0.0015	0.37624	631	14	627.8	9	617	59	627.8	9	0.507132
WCSS2_23.FIN2	376	1.006	0.583	0.01	0.0752	0.00072	0.37178	465.7	6.6	467.4	4.3	442	37	467.4	4.3	0.365042	Rim
WCSS2_23.FIN2	207.2	1.58	0.664	0.026	0.0834	0.0017	0.38004	516	16	516	10	489	80	516	10	0	Core
WCSS2_24.FIN2	359	0.907	0.506	0.012	0.06511	0.00074	0.24777	414.7	8.4	406.6	4.5	438	54	406.6	4.5	1.95322
WCSS2_25.FIN2	82.2	1.195	3.586	0.048	0.2707	0.0026	0.39596	1546	10	1544	13	1541	25	1541	25	0.194679
WCSS2_26.FIN2	189.3	1.719	2.587	0.056	0.2215	0.0036	0.54919	1296	16	1290	19	1322	32	1322	32	2.42057
WCSS2_27.FIN2	126.5	0.824	0.584	0.014	0.07487	0.00079	0.18107	465.3	9.1	465.3	4.8	458	55	465.3	4.8	0
WCSS2_28.FIN2	152	1.69	0.889	0.019	0.1047	0.0014	0.10698	645	10	641.9	8.1	659	52	641.9	8.1	0.48062
WCSS2_29.FIN2	202.2	1.528	1.898	0.022	0.1853	0.0017	0.17849	1079.8	7.8	1095.5	9.3	1056	27	1056	27	3.74053
WCSS2_30.FIN2	134	1.87	1.012	0.037	0.1162	0.0023	0.33278	711	20	708	13	706	70	708	13	0.421941	Rim
WCSS2_30.FIN2	102.2	1.068	1.257	0.038	0.1324	0.0019	0.34469	824	17	801	11	878	61	801	11	2.79126	Core
WCSS2_31.FIN2	66.8	0.625	0.669	0.022	0.08412	0.00094	0.022584	517	14	520.6	5.6	481	75	520.6	5.6	0.696325
WCSS2_32.FIN2	273	2.08	1.876	0.03	0.1806	0.0021	0.47058	1071	11	1070	12	1078	30	1078	30	0.742115	Rim
WCSS2_32.FIN2	78.4	1.814	2.07	0.12	0.1934	0.0044	0.007257	1137	41	1140	24	1110	130	1110	130	2.7027	Core
WCSS2_33.FIN2	215	0.976	1.924	0.024	0.1818	0.0013	0.36459	1088	8.3	1076.9	7.1	1101	23	1101	23	2.18892
WCSS2_34.FIN2	340.9	3.15	3.341	0.026	0.2568	0.0018	0.55413	1490.7	6.3	1473.1	9.1	1498	13	1498	13	1.66222
WCSS2_35.FIN2	331	1.681	4.416	0.034	0.3042	0.0021	0.50544	1714.5	6.3	1712	10	1701	14	1701	14	0.646678
WCSS2_36.FIN2	75.9	0.599	0.739	0.022	0.0898	0.0012	0.23003	559	13	554.3	6.8	542	63	554.3	6.8	0.840787
WCSS2_37.FIN2	107.9	1.291	1.909	0.028	0.1829	0.0015	0.20842	1085.2	9.6	1082.4	8.3	1079	31	1079	31	0.315107
WCSS2_38.FIN2	131.7	0.693	4.619	0.061	0.3104	0.0034	0.19651	1752	11	1742	17	1766	29	1766	29	1.359
WCSS2_39.FIN2	344.4	0.638	0.739	0.014	0.0916	0.00074	0.2666	561.2	8.3	565	4.4	553	41	565	4.4	0.67712
WCSS2_40.FIN2	669	12.25	0.7612	0.0095	0.09408	0.00071	0.26532	574.3	5.5	579.6	4.2	578	29	579.6	4.2	0.922863
WCSS2_41.FIN2	230	1.572	1.219	0.043	0.1317	0.0028	0.85473	806	20	797	16	852	44	797	16	1.11663
WCSS2_42.FIN2	179.2	0.735	0.685	0.015	0.08694	0.00095	0.37401	528.5	9.2	537.4	5.6	512	46	537.4	5.6	1.68401
WCSS2_43.FIN2	188	0.418	0.901	0.016	0.10678	0.00094	0.22629	650.7	8.7	654	5.5	651	40	654	5.5	0.507146
WCSS2_44.FIN2	122.2	1.785	2.12	0.027	0.1957	0.0013	0.20728	1154.2	8.8	1152	6.9	1163	26	1163	26	0.94583
WCSS2_45.FIN2	501	1.133	0.94	0.017	0.1096	0.0011	0.38401	672.2	8.9	670.2	6.6	669	36	670.2	6.6	0.29753
WCSS2_46.FIN2	98.5	0.547	0.535	0.03	0.06517	0.00091	0.072595	433	20	407	5.5	500	120	407	5.5	6.00462
WCSS2_47.FIN2	116.1	1.172	1.394	0.025	0.1455	0.0013	0.1877	886	10	875.4	7.3	869	37	869	37	0.736479
WCSS2_48.FIN2	506.3	33.7	0.563	0.0081	0.07058	0.00055	0.29432	453	5.2	439.7	3.3	463	31	439.7	3.3	2.93598
WCSS2_49.FIN2	85.7	0.862	13.89	0.14	0.5109	0.0043	0.56805	2742.2	9.4	2662	19	2762	14	2762	14	3.62056
WCSS2_50.FIN2	102.6	1.32	2.123	0.03	0.1924	0.0015	0.28426	1155.8	9.4	1134.1	8.2	1143	27	1143	27	0.778653
WCSS2_51.FIN2	108	0.87	0.771	0.02	0.09334	0.00096	0.12888	579	12	575.2	5.7	591	59	575.2	5.7	0.656304
WCSS2_52.FIN2	417	1.422	0.3721	0.0055	0.05094	0.00043	0.23963	320.9	4.1	320.3	2.6	347	34	320.3	2.6	0.186974
WCSS2_53.FIN2	564	9.35	0.731	0.01	0.09031	0.00083	0.28674	556.8	5.9	557.4	4.9	599	30	557.4	4.9	0.107759
WCSS2_54.FIN2	400	2.61	4.007	0.041	0.2888	0.0022	0.66171	1634.6	8.3	1635	11	1683	14	1683	14	2.85205
WCSS2_55.FIN2	81.6	1.711	1.284	0.031	0.1366	0.0019	0.20702	836	14	825	11	917	53	825	11	1.31579
WCSS2_56.FIN2	176.5	0.632	0.401	0.011	0.05523	0.00054	0.099445	341.1	7.8	346.5	3.3	337	59	346.5	3.3	1.58311
WCSS2_57.FIN2	429	1.751	14.31	0.12	0.5268	0.0043	0.7528	2769.5	7.6	2730	18	2817.5	8	2817.5	8	3.10559
WCSS2_58.FIN2	649	2.63	0.564	0.014	0.0728	0.0015	0.32587	454.1	9.2	452.9	8.8	472	59	452.9	8.8	0.264259	Rim
WCSS2_58.FIN2	291	1.585	2.262	0.026	0.1831	0.002	0.29245	1200	8.1	1084	11	1408	25	1408	25	23.0114	Core
WCSS2_59.FIN2	431	2.014	1.649	0.025	0.1657	0.0018	0.57657	988.4	9.8	988	10	973	26	973	26	1.54162	Rim
WCSS2_59.FIN2	167.9	1.565	1.938	0.041	0.1843	0.0022	0.26569	1093	14	1090	12	1064	43	1064	43	2.44361	Core
WCSS2_60.FIN2	162.8	1.309	1.856	0.03	0.1785	0.0021	0.45181	1064	11	1059	11	1030	30	1030	30	2.81553
WCSS2_61.FIN2	121.3	1.418	3.262	0.05	0.2422	0.003	0.55738	1470	12	1397	16	1505	25	1505	25	7.17608
WCSS2_62.FIN2	85.4	1.323	1.713	0.045	0.1631	0.0023	0.21153	1015	17	974	13	1023	55	1023	55	4.78983
WCSS2_63.FIN2	394	2.05	2.734	0.044	0.2206	0.0031	0.45625	1337	12	1285	16	1354	30	1354	30	5.09601
WCSS2_64.FIN2	138.8	2.72	1.528	0.027	0.1513	0.0014	0.11568	942	11	908	7.7	953	37	953	37	4.72193
WCSS2_65.FIN2	188.9	0.4949	5.552	0.045	0.3395	0.0025	0.47318	1908	7	1884	12	1894	14	1894	14	0.527983
WCSS2_66.FIN2	225.7	1.078	0.588	0.012	0.07536	0.00063	0.1607	468.6	7.7	468.3	3.8	451	47	468.3	3.8	0.0640205	Rim
WCSS2_66.FIN2	142.4	1.342	0.927	0.042	0.1087	0.0029	0.039978	665	22	665	17	640	110	665	17	0	Core
WCSS2_67.FIN2	96.5	0.919	1.321	0.035	0.1359	0.0022	0.55329	851	15	821	13	936	46	821	13	3.52526
WCSS2_68.FIN2	35.7	0.811	2.419	0.071	0.2164	0.0033	0.34771	1242	21	1262	18	1237	57	1237	57	2.02102
WCSS2_69.FIN2	618	11.2	1.041	0.04	0.1088	0.0019	0.68062	724	20	666	11	961	60	666	11	8.01105	Rim
WCSS2_69.FIN2	411	4.51	1.273	0.028	0.1328	0.0017	0.011761	833	13	803.7	9.9	958	53	803.7	9.9	3.51741	Core
WCSS2_70.FIN2	28.2	0.589	23.61	0.3	0.6613	0.0094	0.71522	3254	12	3269	36	3300	17	3300	17	0.939394
WCSS2_71.FIN2	77.2	0.4263	1.814	0.035	0.184	0.0018	0.14953	1048	13	1088.3	9.6	1046	41	1046	41	4.04398
WCSS2_72.FIN2	512	1.552	1.587	0.015	0.1642	0.001	0.22969	964.8	6.1	980.1	5.6	1012	21	1012	21	3.15217
WCSS2_73.FIN2	57.3	2.683	2.135	0.056	0.2008	0.0026	0.51346	1160	17	1179	14	1182	44	1182	44	0.253807
WCSS2_74.FIN2	182	1.12	5.241	0.048	0.3393	0.0025	0.58945	1858.2	7.8	1883	12	1887	14	1887	14	0.211977
WCSS2_75.FIN2	228.6	1.34	1.439	0.023	0.1519	0.0019	0.62152	904	9.6	911	11	926	26	926	26	1.61987
WCSS2_76.FIN2	232	0.95	0.53	0.015	0.06839	0.00095	0.35873	431	10	426.4	5.7	475	63	426.4	5.7	1.06729
WCSS2_77.FIN2	40.6	3.3	1.925	0.065	0.1828	0.0032	0.23703	1086	22	1082	18	1083	71	1083	71	0.0923361
WCSS2_78.FIN2	74.2	0.921	1.861	0.035	0.1802	0.0019	0.21023	1067	12	1068	10	1063	37	1063	37	0.470367
WCSS2_79.FIN2	96.2	0.436	1.857	0.032	0.18	0.0016	0.33093	1064	11	1066.8	8.5	1056	34	1056	34	1.02273
WCSS2_80.FIN2	203	1.041	1.834	0.032	0.1768	0.002	0.026282	1056	11	1049	11	1099	38	1099	38	4.54959
WCSS2_81.FIN2	128	1.754	1.502	0.038	0.1551	0.0024	0.36276	928	15	929	14	922	53	922	53	0.759219
WCSS2_82.FIN2	206	0.88	1.8	0.024	0.1762	0.0018	0.52666	1045.5	9.1	1046	10	1056	25	1056	25	0.94697
WCSS2_83.FIN2	89.8	0.823	1.043	0.026	0.1181	0.0015	0.20955	724	13	719.3	8.9	751	59	719.3	8.9	0.649171
WCSS2_84.FIN2	182.6	0.989	0.511	0.012	0.06714	0.00089	0.20299	417.7	8.2	418.8	5.4	422	54	418.8	5.4	0.263347
WCSS2_85.FIN2	133.5	1.673	1.197	0.023	0.131	0.0015	0.14482	797	11	793.2	8.4	826	42	793.2	8.4	0.476788
WCSS2_86.FIN2	356	0.785	0.6004	0.0096	0.0765	0.00084	0.27165	477	6.1	475.2	5	485	38	475.2	5	0.377358
WCSS2_87.FIN2	395	1.997	1.131	0.019	0.1222	0.0011	0.26316	767.6	9	743	6.3	834	35	743	6.3	3.20479	Rim
WCSS2_87.FIN2	169.4	2.194	1.259	0.032	0.1347	0.0017	0.12048	826	14	814.3	9.9	821	49	814.3	9.9	1.41646	Core
WCSS2_88.FIN2	173	1.185	0.81	0.014	0.09739	0.00075	0.12283	601	8.1	599.1	4.4	571	40	599.1	4.4	0.31614
WCSS2_89.FIN2	172.2	0.809	0.69	0.014	0.08513	0.00092	0.037669	531.8	8.4	526.6	5.5	502	52	526.6	5.5	0.977811
WCSS2_90.FIN2	242.8	4.31	1.202	0.015	0.1318	0.0011	0.3253	800.4	7	797.7	6.5	758	26	797.7	6.5	0.337331
WCSS2_91.FIN2	506	1.517	0.7606	0.0096	0.09215	0.00091	0.33739	573.9	5.6	568.2	5.4	556	27	568.2	5.4	0.993204
WCSS2_92.FIN2	139	1.598	1.572	0.025	0.1587	0.0015	0.1844	958	9.9	949.3	8.3	947	36	947	36	0.242872
WCSS2_93.FIN2	99.9	1.388	1.842	0.027	0.178	0.0017	0.26156	1060	9.9	1056	9.3	1048	32	1048	32	0.763359
WCSS2_94.FIN2	501	1.641	0.562	0.012	0.07262	0.00092	0.1995	452.4	7.7	451.9	5.6	447	50	451.9	5.6	0.110522	Rim
WCSS2_94.FIN2	99.8	1.423	1.535	0.053	0.1567	0.0033	0.1335	943	21	938	18	936	76	936	76	0.213675	Core
WCSS2_95.FIN2	315	1.097	0.6	0.011	0.07694	0.00078	0.37562	476.7	6.9	477.8	4.6	472	38	477.8	4.6	0.230753
WCSS2_96.FIN2	89.7	0.557	0.386	0.024	0.0519	0.0012	0.08435	329	18	326	7.3	370	140	326	7.3	0.911854
WCSS2_97.FIN2	324	0.7377	2.085	0.019	0.1935	0.0013	0.42687	1143	6.2	1140.2	7	1168	17	1168	17	2.38014
WCSS2_99.FIN2	325	9.45	1.692	0.029	0.1692	0.0027	0.34998	1005	11	1008	15	1014	37	1014	37	0.591716	Rim
WCSS2_99.FIN2	137.2	1.78	3.03	0.055	0.2462	0.0035	0.21615	1414	14	1419	18	1408	39	1408	39	0.78125	Core
WCSS2_100.FIN2	105.5	0.544	3.986	0.05	0.2859	0.0027	0.34181	1630	10	1621	14	1645	23	1645	23	1.45897
WCSS2_101.FIN2	174	1.28	1.904	0.032	0.1841	0.0025	0.38077	1081	11	1089	14	1049	35	1049	35	3.81316
WCSS2_102.FIN2	235.4	2.75	0.791	0.013	0.09545	0.00089	0.21193	590.8	7.1	587.6	5.2	579	36	587.6	5.2	0.541638
WCSS2_103.FIN2	562	2.207	12.67	0.14	0.4916	0.0053	0.70863	2654	10	2577	23	2695	14	2695	14	4.37848
WCSS2_104.FIN2	247.7	15.6	1.762	0.026	0.1725	0.0019	0.34883	1030.6	9.6	1026	10	1027	31	1027	31	0.097371
WCSS2_105.FIN2	330	2.79	0.795	0.019	0.0934	0.0016	0.20975	593	11	575.7	9.3	649	58	575.7	9.3	2.91737	Rim
WCSS2_105.FIN2	242	3.222	0.864	0.021	0.101	0.0013	0.30502	631	11	620.4	7.4	661	50	620.4	7.4	1.67987	Core
WCSS2_106.FIN2	170.6	0.965	3.781	0.078	0.2839	0.0055	0.73283	1586	16	1610	28	1556	27	1556	27	3.47044
WCSS2_107.FIN2	56.4	0.3113	1.021	0.03	0.1172	0.0016	0.23135	711	15	714.4	9.3	684	65	714.4	9.3	0.4782
WCSS2_108.FIN2	125.5	1.114	0.565	0.014	0.07255	0.00066	0.14586	453.2	9.1	451.5	4	464	55	451.5	4	0.37511
WCSS2_109.FIN2	133.4	0.4845	0.658	0.019	0.0846	0.001	0.19739	512	12	523.6	6.1	492	69	523.6	6.1	2.26563
WCSS2_110.FIN2	314	3.98	1.773	0.029	0.1737	0.0021	0.40548	1035	11	1033	11	1079	33	1079	33	4.26321	Rim
WCSS2_110.FIN2	176.9	1.686	2.084	0.048	0.1934	0.0034	0.47751	1143	16	1140	18	1177	42	1177	42	3.14359	Core
WCSS2_111.FIN2	83.5	0.748	0.384	0.014	0.05307	0.00071	0.10143	329	10	333.3	4.3	336	80	333.3	4.3	1.30699
WCSS2_112.FIN2	191	0.972	0.537	0.014	0.07048	0.00078	0.32308	436.4	9.1	439	4.7	462	55	439	4.7	0.595784
WCSS2_113.FIN2	200	0.969	0.411	0.01	0.0564	0.00058	0.025668	348.5	7.2	353.7	3.5	358	56	353.7	3.5	1.49211
WCSS2_114.FIN2	304	0.56	0.714	0.012	0.08904	0.00077	0.26871	546.7	7.2	549.8	4.6	568	37	549.8	4.6	0.567039
WCSS2_115.FIN2	209	0.891	1.805	0.022	0.1754	0.0015	0.32528	1047.3	7.8	1041.7	8.2	1094	24	1094	24	4.78062
WCSS2_116.FIN2	20.99	1.209	2.18	0.094	0.1817	0.0039	0.36409	1163	30	1075	21	1353	80	1353	80	20.5469
WCSS2_117.FIN2	439	1.654	0.5185	0.0076	0.0676	0.00057	0.16809	423.7	5.1	421.6	3.4	460	32	421.6	3.4	0.495634
WCSS2_118.FIN2	348	2.166	3.174	0.038	0.256	0.0022	0.49058	1449.9	9.2	1469	11	1445	20	1445	20	1.6609
WCSS2_119.FIN2	30.53	0.904	1.824	0.067	0.1642	0.003	0.12797	1049	24	980	16	1211	78	1211	78	19.0751
WCSS2_120.FIN2	148.4	2.859	1.309	0.022	0.1402	0.0011	0.19347	848.3	9.5	846	6.4	858	36	846	6.4	0.27113
WCSS2_121.FIN2	83	2.51	3.619	0.061	0.2725	0.0029	0.40269	1555	13	1553	15	1565	29	1565	29	0.766773
WCSS2_122.FIN2	465	5.14	0.679	0.013	0.08427	0.00091	0.3516	525.9	7.7	522.6	5.7	545	39	522.6	5.7	0.627496
WCSS2_123.FIN2	120.6	0.646	0.619	0.015	0.07778	0.00089	0.19561	487.4	9.4	482.8	5.3	502	55	482.8	5.3	0.943783
WCSS2_124.FIN2	290.4	0.919	0.707	0.013	0.08753	0.00077	0.26313	542.1	7.5	540.9	4.6	538	40	540.9	4.6	0.221361
WCSS2_125.FIN2	427	1.438	0.9031	0.009	0.10716	0.00062	0.09962	653	4.8	656.2	3.6	637	25	656.2	3.6	0.490046
WCSS2_126.FIN2	94.9	1.331	4.632	0.062	0.3137	0.0024	0.43024	1753	11	1759	12	1758	22	1758	22	0.0568828
WCSS2_127.FIN2	131.5	0.591	4.826	0.068	0.2988	0.0034	0.69287	1787	12	1685	17	1922	19	1922	19	12.3309
WCSS2_128.FIN2	76.3	1.005	1.822	0.038	0.1746	0.0021	0.284	1051	14	1037	11	1095	44	1095	44	5.2968
WCSS2_129.FIN2	209.9	3.53	0.946	0.016	0.11158	0.00082	0.05639	675.2	8.2	681.8	4.8	672	39	681.8	4.8	0.977488
WCSS2_130.FIN2	128.4	2.034	0.756	0.03	0.0877	0.0017	0.40916	570	17	542	10	687	76	542	10	4.91228
WCSS2_131.FIN2	73.5	1.101	2.108	0.039	0.1952	0.0019	0.25574	1150	13	1149	10	1157	38	1157	38	0.691443
WCSS2_132.FIN2	201.3	1.032	6.69	0.065	0.3726	0.0032	0.64248	2071.1	8.5	2041	15	2109	13	2109	13	3.22428
WCSS2_133.FIN2	117.8	0.735	0.391	0.012	0.054	0.0007	0.24054	334.1	8.6	339	4.3	306	60	339	4.3	1.46663
WCSS2_134.FIN2	86.4	1.275	2.149	0.047	0.1998	0.0024	0.14799	1163	15	1174	13	1135	47	1135	47	3.43612
WCSS2_135.FIN2	106.9	1.633	0.407	0.013	0.05394	0.00074	0.07829	345.3	9.7	338.6	4.5	363	75	338.6	4.5	1.94034
WCSS2_136.FIN2	223	1.333	0.723	0.015	0.08942	0.00088	0.21203	551.1	8.8	552.1	5.2	536	45	552.1	5.2	0.181455
WCSS2_137.FIN2	226.8	1.18	3.494	0.042	0.2664	0.0023	0.4419	1525	9.6	1522	12	1515	22	1515	22	0.462046
WCSS2_138.FIN2	649	0.658	1.972	0.035	0.1871	0.0031	0.67843	1105	12	1105	17	1092	30	1092	30	1.19048
WCSS2_139.FIN2	194.5	1.406	0.592	0.012	0.07536	0.00062	0.23667	471.2	7.5	468.3	3.7	468	43	468.3	3.7	0.61545
WCSS2_140.FIN2	666	19.8	0.644	0.016	0.0727	0.0015	0.44971	504	10	452.4	8.8	744	53	452.4	8.8	10.2381	Rim
WCSS2_140.FIN2	209.5	3.1	0.825	0.025	0.098	0.0016	0.23211	609	14	602.8	9.5	613	66	602.8	9.5	1.01806	Core
WCSS2_141.FIN2	98.5	0.7175	3.923	0.071	0.2667	0.0032	0.2917	1617	15	1524	16	1732	34	1732	34	12.0092	Rim
WCSS2_141.FIN2	89	0.7	4.5	0.11	0.2951	0.0057	0.42598	1729	20	1667	29	1789	43	1789	43	6.81945	Core
WCSS2_142.FIN2	67.4	0.572	5.89	0.1	0.3548	0.0042	0.28037	1961	16	1957	20	1944	33	1944	33	0.668724
WCSS2_143.FIN2	163.3	2.17	1.753	0.031	0.1725	0.0019	0.32439	1027	11	1026	11	998	35	998	35	2.80561
WCSS2_144.FIN2	88.5	1.17	2.082	0.035	0.1934	0.0017	0.39697	1142	11	1140.6	9.6	1111	32	1111	32	2.66427
WCSS2_145.FIN2	299.8	0.916	0.7005	0.009	0.08699	0.00061	0.24068	538.6	5.4	537.7	3.6	505	29	537.7	3.6	0.1671
WCSS2_146.FIN2	175	1.24	0.48	0.012	0.06317	0.00072	0.20599	399.2	8.8	394.8	4.4	391	57	394.8	4.4	1.1022
0	0	0	0	0	0	0	0	0	0	0	0	0	0	#DIV/0!	#DIV/0!	#DIV/0!
91500b_2.FIN2	85.9	1.959	1.751	0.034	0.1715	0.0029	0.53057	1029	13	1020	16	1026	38	1026	38	0.584795
91500b_3.FIN2	84.7	1.914	1.715	0.035	0.1712	0.0024	0.40457	1013	13	1018	13	1002	41	1002	41	1.59681
91500b_4.FIN2	78.8	1.815	1.758	0.033	0.1738	0.0021	0.42798	1027	12	1033	12	1005	35	1005	35	2.78607
91500b_5.FIN2	78.7	1.876	1.791	0.036	0.1731	0.0023	0.34303	1039	13	1029	13	1060	39	1060	39	2.92453
91500b_6.FIN2	74	1.859	1.855	0.033	0.1746	0.0022	0.30545	1062	12	1037	12	1077	36	1077	36	3.71402
91500b_7.FIN2	78.3	1.857	1.858	0.035	0.1737	0.0024	0.3552	1063	13	1032	13	1085	39	1085	39	4.88479
91500b_8.FIN2	78.9	1.976	1.825	0.038	0.1745	0.0029	0.52937	1053	14	1036	16	1063	39	1063	39	2.53998
0	0	0	0	0	0	0	0	0	0	0	0	0	0	#DIV/0!	#DIV/0!	#DIV/0!
GJ1_1.FIN2	395	47.6	0.807	0.015	0.0995	0.0016	0.59779	599.3	8.3	611.1	9.1	479	35	611.1	9.1	1.96896
GJ1_2.FIN2	376.4	43	0.817	0.015	0.0968	0.0011	0.48502	604.9	8.5	595.3	6.4	666	35	595.3	6.4	1.58704
GJ1_3.FIN2	392	44.9	0.807	0.013	0.0966	0.0015	0.51657	599.6	7.4	594.2	8.5	520	35	594.2	8.5	0.9006
GJ1_4.FIN2	399	45.7	0.806	0.013	0.0964	0.0013	0.62134	599.1	7.1	593	7.8	497	28	593	7.8	1.01819
GJ1_5.FIN2	378.1	48.1	0.815	0.014	0.09774	0.00092	0.36971	604.1	7.6	601.1	5.4	660	33	601.1	5.4	0.496607
GJ1_6.FIN2	377.1	48.1	0.806	0.014	0.09663	0.00094	0.38192	599.3	7.8	594.5	5.5	681	35	594.5	5.5	0.800934
GJ1_7.FIN2	374.9	43.5	0.811	0.012	0.10052	0.00098	0.41687	602.8	6.6	617.4	5.7	604	28	617.4	5.7	2.42203
GJ1_8.FIN2	384.9	47.4	0.809	0.01	0.0966	0.001	0.39653	601.1	5.8	594.1	6	647	29	594.1	6	1.16453
GJ1_9.FIN2	389.7	50.1	0.809	0.011	0.09662	0.00086	0.31154	601.5	6.1	595.1	5.2	676	29	595.1	5.2	1.06401
GJ1_10.FIN2	383	46.5	0.809	0.011	0.09895	0.00092	0.47578	601.3	6.3	608.1	5.4	626	28	608.1	5.4	1.13088
GJ1_11.FIN2	389	45.7	0.809	0.01	0.097	0.0011	0.41154	601.5	5.6	596.9	6.3	584	28	596.9	6.3	0.764755
GJ1_12.FIN2	384.5	42.7	0.809	0.011	0.0971	0.0012	0.42568	601.4	5.9	597.4	6.9	553	29	597.4	6.9	0.665115
GJ1_13.FIN2	383.7	49.3	0.809	0.011	0.09707	0.00097	0.41076	601.4	6.1	597.8	5.9	626	28	597.8	5.9	0.598603
GJ1_14.FIN2	382.8	46.3	0.809	0.011	0.09813	0.00087	0.50404	601.4	5.9	603.4	5.1	589	26	603.4	5.1	0.332557
GJ1_15.FIN2	382.6	43.6	0.8093	0.0093	0.09643	0.0008	0.2747	601.6	5.2	593.4	4.7	622	26	593.4	4.7	1.36303
GJ1_16.FIN2	383.3	47.5	0.809	0.01	0.09802	0.00067	0.19169	602.2	6	602.8	3.9	602	30	602.8	3.9	0.0996347
GJ1_17.FIN2	392.4	45.7	0.8093	0.0096	0.09691	0.00083	0.35123	602.2	5.5	596.2	4.9	596	27	596.2	4.9	0.996347
GJ1_18.FIN2	378.8	48.6	0.809	0.011	0.09728	0.00081	0.34619	602.2	5.8	598.4	4.8	644	28	598.4	4.8	0.63102
GJ1_19.FIN2	381	44.1	0.8093	0.0097	0.09803	0.00086	0.19887	601.5	5.4	602.7	5.1	580	29	602.7	5.1	0.199501
GJ1_20.FIN2	390.1	44.5	0.809	0.011	0.0982	0.001	0.28314	601.4	6	603.6	6.1	543	32	603.6	6.1	0.365813
GJ1_21.FIN2	376.4	40.7	0.809	0.01	0.09862	0.00074	0.31705	601.5	5.7	606.3	4.4	647	27	606.3	4.4	0.798005
GJ1_22.FIN2	389.3	43.7	0.809	0.012	0.0979	0.0011	0.38352	601.3	6.5	601.7	6.3	519	30	601.7	6.3	0.0665225
GJ1_23.FIN2	388	44.1	0.8093	0.0097	0.0993	0.001	0.43797	601.5	5.4	610.1	6	540	26	610.1	6	1.42976
GJ1_24.FIN2	380.2	49.6	0.809	0.01	0.0979	0.00072	0.20885	601.4	5.8	602.1	4.2	686	28	602.1	4.2	0.116395
GJ1_25.FIN2	382.3	53.1	0.809	0.012	0.09832	0.00073	0.36847	601.3	6.5	604.5	4.3	616	29	604.5	4.3	0.53218
GJ1_26.FIN2	384.9	44.4	0.809	0.01	0.09712	0.00075	0.1971	601.4	5.7	597.5	4.4	616	28	597.5	4.4	0.648487
GJ1_27.FIN2	381.9	45.3	0.809	0.011	0.09718	0.00079	0.35103	601.4	6	597.8	4.6	622	28	597.8	4.6	0.598603
GJ1_28.FIN2	389.1	45.8	0.8093	0.0099	0.09607	0.00081	0.3871	602.1	5.7	591.3	4.8	590	27	591.3	4.8	1.79372
GJ1_29.FIN2	382.3	46.2	0.809	0.01	0.09656	0.0009	0.33442	601.4	5.8	594.1	5.3	641	28	594.1	5.3	1.21383
GJ1_30.FIN2	384.2	42.6	0.8093	0.0096	0.09862	0.00086	0.36012	602.2	5.5	606.2	5	584	26	606.2	5	0.664231
GJ1_31.FIN2	385.3	44.3	0.8093	0.0092	0.09761	0.00075	0.16752	601.6	5.2	600.3	4.4	595	28	600.3	4.4	0.21609
GJ1_32.FIN2	378.6	46	0.8093	0.0096	0.09843	0.00076	0.29074	601.5	5.4	605.2	4.5	630	28	605.2	4.5	0.615129
GJ1_33.FIN2	389	47.3	0.809	0.01	0.09769	0.00083	0.36932	601.4	5.8	600.8	4.9	634	27	600.8	4.9	0.0997672
GJ1_34.FIN2	382.5	44.4	0.809	0.01	0.09761	0.00079	0.34582	601.4	5.8	600.3	4.6	616	27	600.3	4.6	0.182907
GJ1_35.FIN2	388.5	44.9	0.809	0.011	0.09797	0.00087	0.42556	602.9	6.1	602.4	5.1	607	25	602.4	5.1	0.0829325
GJ1_36.FIN2	379.8	47.6	0.809	0.011	0.0977	0.001	0.44625	601.4	6.1	600.8	6	632	29	600.8	6	0.0997672
GJ1_37.FIN2	382.3	48.5	0.809	0.012	0.09682	0.00098	0.37338	601.3	6.5	595.7	5.8	603	31	595.7	5.8	0.931315
GJ1_38.FIN2	383	49.3	0.809	0.011	0.09692	0.00081	0.34853	601.4	5.9	596.3	4.8	618	26	596.3	4.8	0.848021
GJ1_39.FIN2	387.4	42.1	0.8093	0.0095	0.09747	0.00076	0.34602	601.5	5.3	599.5	4.4	579	25	599.5	4.4	0.332502
GJ1_40.FIN2	391	47.2	0.8094	0.009	0.09783	0.00084	0.31391	601.6	5	601.6	4.9	596	24	601.6	4.9	0
GJ1_41.FIN2	379.7	46.7	0.809	0.011	0.09639	0.00086	0.3932	601.3	6	593.1	5	572	28	593.1	5	1.36371
GJ1_42.FIN2	385.5	47.3	0.8093	0.0098	0.09729	0.00068	0.27757	602.2	5.6	598.5	4	545	28	598.5	4	0.614414
GJ1_43.FIN2	384.1	47.9	0.8093	0.0095	0.09756	0.00071	0.29059	601.5	5.3	600	4.1	624	25	600	4.1	0.249377
GJ1_44.FIN2	382.3	44.1	0.809	0.011	0.09871	0.00068	0.19186	601.4	5.9	606.8	4	603	30	606.8	4	0.897905

## Sheet: Table S4 WCSS1 and LSS1
Table S4
Sample Name:								207/235		206/238		207/206		Best age
Grain #	[U] ppm	U/Th	207/235	2σ error	206/238	2σ error	RHO	Age Ma	2σ error	Age (Ma)	2σ error	Age (Ma)	2σ error	(Ma)	2σ error	% Discordance*	Rim/Core
LSS1_1.FIN2	126.9	1.62	0.703	0.019	0.0867	0.0011	0.39582	539	11	535.8	6.7	538	55	535.8	6.7	0.593692
LSS1_2.FIN2	425	3.44	0.636	0.013	0.0803	0.001	0.22199	498.7	8.2	497.8	6.2	500	43	497.8	6.2	0.180469
LSS1_3.FIN2	515	9.61	0.713	0.01	0.08815	0.00088	0.45679	546.3	6.1	544.5	5.2	549	30	544.5	5.2	0.329489
LSS1_4.FIN2	300	1.865	2.062	0.024	0.1923	0.0025	0.73435	1136.2	8.2	1133	13	1145	19	1145	19	1.04803
LSS1_5.FIN2	39.8		1.402	0.067	0.1458	0.0036	0.2782	885	28	877	20	862	99	862	99	1.74014
LSS1_6.FIN2	555	2.67	2.04	0.033	0.1911	0.0026	0.80763	1130	11	1127	14	1138	20	1138	20	0.966608
LSS1_8.FIN2	320	1.087	0.415	0.0092	0.05405	0.00071	0.44193	351.7	6.6	339.3	4.3	446	47	339.3	4.3	3.52573
LSS1_10.FIN2	402	14.7	0.734	0.018	0.0902	0.002	0.37061	558	10	556	12	556	64	556	12	0.358423
LSS1_11.FIN2	592	1.097	0.6309	0.0091	0.08015	0.00086	0.57308	496.2	5.7	496.9	5.1	484	30	496.9	5.1	0.141072
LSS1_12.FIN2	209.6	1.922	1.636	0.023	0.1647	0.0013	0.425	984	8.6	982.6	7.2	978	25	978	25	0.470348
LSS1_13.FIN2	254.9	2.459	1.818	0.021	0.1744	0.0014	0.4828	1051	7.6	1036.3	7.8	1070	21	1070	21	3.14953
LSS1_14.FIN2	47.3	1.709	1.961	0.046	0.186	0.0027	0.37914	1098	16	1099	15	1087	46	1087	46	1.10396
LSS1_16.FIN2	193	22.5	0.682	0.023	0.0813	0.0014	0.11761	527	14	503.9	8.5	611	80	503.9	8.5	4.3833	Rim
LSS1_16.FIN2	394.6	8.15	1.554	0.037	0.1331	0.002	0.45358	951	15	805	12	1294	42	805	12	15.3523	Core
LSS1_17.FIN2	190.2	1.585	0.692	0.029	0.083	0.0018	0.48005	533	17	514	11	596	82	514	11	3.56473
LSS1_18.FIN2	48.3	1.38	7.02	0.11	0.3818	0.0057	0.55096	2111	14	2083	27	2138	25	2138	25	2.5725
LSS1_19.FIN2	83.8	1.476	1.715	0.038	0.168	0.0025	0.42807	1012	14	1001	14	1025	42	1025	42	2.34146
LSS1_20.FIN2	162.8	0.843	1.971	0.033	0.1879	0.0019	0.52216	1104	11	1110	10	1084	29	1084	29	2.39852
LSS1_21.FIN2	215.5	1.417	1.649	0.029	0.1619	0.002	0.6307	988	11	967	11	1030	25	1030	25	6.1165
LSS1_22.FIN2	462.4	1.294	1.708	0.032	0.1635	0.0027	0.65399	1010	12	976	15	1073	30	1073	30	9.04007
LSS1_23.FIN2	330	2.59	0.942	0.016	0.1093	0.0015	0.63331	672.7	8.3	668.4	8.6	678	30	668.4	8.6	0.639215
LSS1_24.FIN2	263	4.05	0.679	0.019	0.085	0.0013	0.35793	525	11	527	7.7	497	57	527	7.7	0.380952
LSS1_25.FIN2	296	2.241	1.821	0.025	0.1739	0.0018	0.61586	1052	9	1033.3	9.7	1077	20	1077	20	4.05757
LSS1_26.FIN2	175.4	3.28	1.828	0.028	0.1777	0.0022	0.54884	1053.9	9.9	1054	12	1051	26	1051	26	0.285442
LSS1_27.FIN2	111.8	1.274	1.743	0.035	0.1681	0.0024	0.33656	1023	13	1002	13	1067	40	1067	40	6.09185
LSS1_28.FIN2	385	1.828	1.752	0.023	0.1722	0.0022	0.52643	1027	8.5	1024	12	1023	24	1023	24	0.0977517
LSS1_29.FIN2	97.9	1.419	1.198	0.033	0.1094	0.0025	0.55746	797	15	669	14	1174	50	669	14	16.0602
LSS1_30.FIN2	147.5	2.06	0.754	0.022	0.0918	0.0016	0.21297	569	13	566.2	9.6	567	68	566.2	9.6	0.492091
LSS1_31.FIN2	129.3	1.544	0.764	0.018	0.0937	0.0013	0.20408	576	10	578.4	7.2	561	55	578.4	7.2	0.416667
LSS1_32.FIN2	319.5	6.39	0.688	0.011	0.08519	0.0009	0.43891	532	6.7	527	5.3	547	32	527	5.3	0.93985
LSS1_33.FIN2	243.2	14.3	0.715	0.018	0.0875	0.0013	0.28297	547	10	540.9	7.8	560	55	540.9	7.8	1.11517
LSS1_34.FIN2	217.5	1.869	0.648	0.013	0.08153	0.00095	0.35716	506.6	7.7	505.2	5.7	498	41	505.2	5.7	0.276352
LSS1_35.FIN2	434	3.06	1.782	0.047	0.1651	0.0046	0.90233	1034	17	983	25	1149	23	1149	23	14.4473
LSS1_36.FIN2	483.4	6.59	0.501	0.012	0.0627	0.001	0.51811	411.7	8.3	392.3	6.1	508	46	392.3	6.1	4.71217
LSS1_37.FIN2	397	1.648	0.6131	0.0095	0.07731	0.00089	0.5006	484.9	6	479.9	5.4	501	31	479.9	5.4	1.03114
LSS1_38.FIN2	411	5.03	1.139	0.046	0.1112	0.0032	0.77631	769	21	679	19	1021	50	679	19	11.7035
LSS1_39.FIN2	759	7.1	0.914	0.042	0.1068	0.0036	0.77996	658	22	654	21	662	60	654	21	0.607903	Rim
LSS1_39.FIN2	272	1.227	1.299	0.027	0.1341	0.0018	0.42917	844	12	811	10	929	38	811	10	3.90995	Core
LSS1_40.FIN2	267.1	1.656	4.861	0.056	0.3044	0.0028	0.59218	1794.2	9.7	1712	14	1888	17	1888	17	9.32203
LSS1_41.FIN2	160.3	1.98	3.343	0.041	0.2511	0.0026	0.47377	1489.7	9.6	1444	13	1552	22	1552	22	6.95876
LSS1_42.FIN2	107.7	1.191	3.026	0.055	0.2403	0.0032	0.51953	1413	14	1388	16	1440	30	1440	30	3.61111
LSS1_43.FIN2	73.8	0.69	2.569	0.053	0.2203	0.0034	0.63247	1291	15	1283	18	1295	32	1295	32	0.926641
LSS1_44.FIN2	54.4	1.348	6.772	0.098	0.3851	0.0053	0.5436	2083	14	2099	24	2067	25	2067	25	1.54814
LSS1_45.FIN2	211.2	1.527	0.728	0.015	0.0895	0.0012	0.51841	555.4	9	552.3	7.3	564	39	552.3	7.3	0.558156
LSS1_46.FIN2	54	0.965	2.146	0.043	0.1967	0.0031	0.34552	1161	14	1157	17	1170	44	1170	44	1.11111
LSS1_47.FIN2	215.3	1.286	3.037	0.041	0.2452	0.0026	0.60776	1415	10	1413	13	1417	21	1417	21	0.282287
LSS1_48.FIN2	162.6	2.39	1.244	0.026	0.1346	0.0017	0.50746	819	12	813.6	9.7	835	39	813.6	9.7	0.659341
LSS1_49.FIN2	176.4	0.743	4.208	0.06	0.2982	0.0035	0.58297	1674	12	1682	17	1662	20	1662	20	1.20337
LSS1_50.FIN2	422	4.05	0.833	0.03	0.0973	0.0028	0.78354	614	17	598	16	670	50	598	16	2.60586	Rim
LSS1_50.FIN2	89.4	1.482	1.258	0.039	0.1253	0.0023	0.33442	827	17	761	13	1000	61	761	13	7.98065	Core
LSS1_51.FIN2	814	40	0.733	0.033	0.0899	0.0022	0.65265	557	19	555	13	557	73	555	13	0.359066	Rim
LSS1_51.FIN2	299	1.509	1.864	0.028	0.1761	0.0024	0.67385	1067.6	9.9	1045	13	1114	23	1114	23	6.1939	Core
LSS1_52.FIN2	545.5	1.606	1.699	0.037	0.1572	0.0037	0.8677	1006	14	941	20	1158	24	1158	24	18.7392
LSS1_53.FIN2	26.5	1.229	0.708	0.038	0.0872	0.0022	0.354	536	22	538	13	490	100	538	13	0.373134
LSS1_54.FIN2	239.6	3.2	0.64	0.012	0.0806	0.001	0.43514	501.3	7.6	499.6	6.1	502	41	499.6	6.1	0.339118
LSS1_55.FIN2	134	2.87	1.739	0.031	0.1714	0.0021	0.56184	1023	11	1020	11	1027	29	1027	29	0.681597
LSS1_56.FIN2	157	1.184	2.301	0.047	0.2066	0.0038	0.85581	1210	15	1210	20	1211	21	1211	21	0.0825764
LSS1_57.FIN2	187.4	1.611	1.694	0.068	0.1633	0.0028	0.76445	1003	26	975	16	1101	54	1101	54	11.4441
LSS1_58.FIN2	62.1	2.73	1.37	0.035	0.1449	0.0025	0.46204	874	15	872	14	888	46	888	46	1.8018
LSS1_59.FIN2	666	8.23	0.743	0.026	0.0932	0.0031	0.53157	564	15	574	18	522	72	574	18	1.77305	Rim
LSS1_59.FIN2	249	3.05	1.924	0.033	0.1839	0.0026	0.76567	1089	12	1088	14	1091	24	1091	24	0.274977	Core
LSS1_60.FIN2	343.6	0.5086	1.205	0.02	0.1324	0.0018	0.35706	802.2	9	801	10	806	36	801	10	0.149589
LSS1_61.FIN2	100.3	2.7	2.26	0.057	0.2058	0.0033	0.54762	1198	18	1206	18	1199	48	1199	48	0.58382
LSS1_62.FIN2	890	68	0.783	0.034	0.0923	0.0033	0.84845	586	19	569	19	658	47	569	19	2.90102	Rim
LSS1_62.FIN2	222.1	3.045	1.543	0.041	0.1576	0.0029	0.65132	946	17	943	16	951	42	951	42	0.84122	Core
LSS1_63.FIN2	180	1.564	1.236	0.043	0.1177	0.0026	0.49908	818	19	717	15	1102	58	717	15	12.3472
LSS1_64.FIN2	40.2	0.564	12.05	0.2	0.472	0.0072	0.77971	2605	15	2490	31	2704	19	2704	19	7.9142
LSS1_65.FIN2	100	1.55	3.53	0.062	0.2692	0.0039	0.49293	1530	14	1535	20	1529	31	1529	31	0.392413
LSS1_66.FIN2	653	2.06	0.942	0.015	0.1039	0.0017	0.53803	673.6	7.7	637	10	805	33	637	10	5.43349
LSS1_67.FIN2	171.4	0.837	0.831	0.019	0.1003	0.0014	0.40703	613	11	616	8.4	598	47	616	8.4	0.489396
LSS1_68.FIN2	99.2	2.47	2.336	0.074	0.207	0.0037	0.42351	1221	22	1212	20	1235	57	1235	57	1.86235
LSS1_69.FIN2	216	1.451	5.497	0.074	0.3203	0.0039	0.76083	1898	12	1791	19	2024	16	2024	16	11.5119
LSS1_70.FIN2	128.4	1.169	5.109	0.071	0.3236	0.0035	0.63489	1836	12	1806	17	1875	20	1875	20	3.68
LSS1_71.FIN2	221	0.994	0.893	0.025	0.1077	0.0021	0.51403	646	13	659	12	602	53	659	12	2.01238	Rim
LSS1_71.FIN2	290.3	3.85	1.121	0.034	0.126	0.0026	0.60886	762	16	765	15	758	53	765	15	0.393701	Core
LSS1_72.FIN2	251	1.485	1.819	0.028	0.1738	0.0023	0.58651	1051	10	1033	12	1099	27	1099	27	6.00546
LSS1_73.FIN2	157	6.38	7.044	0.082	0.388	0.0044	0.74345	2116	10	2112	20	2123	15	2123	15	0.518135
LSS1_74.FIN2	313.8	1.732	1.982	0.052	0.1873	0.0047	0.6604	1108	18	1106	26	1119	43	1119	43	1.16175
LSS1_75.FIN2	242.2	1.23	4.041	0.06	0.2768	0.0034	0.67233	1641	12	1575	17	1731	21	1731	21	9.01213
LSS1_76.FIN2	207	2.33	0.9	0.02	0.1057	0.0014	0.38154	651	11	647.8	8.2	660	46	647.8	8.2	0.491551	Rim
LSS1_76.FIN2	117.6	1.535	0.967	0.034	0.113	0.0027	0.39073	686	18	690	15	668	72	690	15	0.58309	Core
LSS1_77.FIN2	217.7	1.981	0.42	0.014	0.0554	0.0011	0.43963	355	10	347.5	6.7	395	79	347.5	6.7	2.11268	Rim
LSS1_77.FIN2	168.6	1.895	0.449	0.017	0.0601	0.0011	0.21638	375	12	376	6.4	360	83	376	6.4	0.266667	Core
LSS1_78.FIN2	103.2	1.888	1.343	0.029	0.1385	0.0018	0.28029	863	13	836	10	928	46	836	10	3.12862
LSS1_79.FIN2	64.9	0.718	12.8	0.22	0.5015	0.0079	0.71494	2663	16	2619	34	2700	22	2700	22	3
LSS1_80.FIN2	388	15.6	0.672	0.039	0.0835	0.0023	0.48675	521	23	517	14	530	160	517	14	0.767754	Rim
LSS1_80.FIN2	74.3	2.132	1.566	0.037	0.1536	0.0022	0.36003	954	15	921	12	1028	47	1028	47	10.4086	Core
LSS1_81.FIN2	206.1	7.77	3.067	0.034	0.2483	0.002	0.47287	1423.2	8.5	1429	11	1413	20	1413	20	1.13234
LSS1_82.FIN2	640	42.2	0.798	0.031	0.0967	0.0034	0.67278	595	18	595	20	594	70	595	20	0	Rim
LSS1_82.FIN2	111.8	2.67	6.26	0.14	0.3659	0.0063	0.76946	2009	19	2008	30	2009	23	2009	23	0.049776	Core
LSS1_83.FIN2	317.1	-10	0.779	0.012	0.09568	0.00088	0.45792	584.1	6.8	589	5.2	567	30	589	5.2	0.838897
LSS1_84.FIN2	103.8	0.681	1.643	0.029	0.1655	0.0017	0.43403	986	11	987.2	9.6	984	33	984	33	0.325203
LSS1_86.FIN2	770	12.4	0.743	0.047	0.0875	0.0049	0.72985	563	27	540	29	652	93	540	29	4.08526	Rim
LSS1_86.FIN2	200.8	1.988	9.33	0.13	0.433	0.0059	0.69138	2370	13	2318	27	2419	17	2419	17	4.17528	Core
LSS1_88.FIN2	459	1.578	0.883	0.015	0.0972	0.0014	0.40734	641.7	7.9	598.1	8	799	36	598.1	8	6.79445
LSS1_89.FIN2	169	1.668	2.488	0.041	0.2152	0.003	0.74511	1268	12	1256	16	1287	22	1287	22	2.4087
LSS1_90.FIN2	420	4.17	0.946	0.015	0.1109	0.0014	0.60019	675.6	7.9	677.8	7.9	674	29	677.8	7.9	0.325636
LSS1_91.FIN2	78.8	0.738	1.103	0.042	0.1228	0.0025	0.14042	751	21	746	15	756	89	746	15	0.665779	Rim
LSS1_91.FIN2	34.92	0.806	1.248	0.064	0.1356	0.0035	0.28199	818	29	820	20	790	110	820	20	0.244499	Core
LSS1_92.FIN2	196.9	1.249	3.493	0.056	0.2626	0.0034	0.70086	1523	13	1502	17	1554	22	1554	22	3.3462
LSS1_93.FIN2	440	2.022	0.857	0.013	0.1031	0.0013	0.46122	627.7	7.3	632.7	7.4	609	33	632.7	7.4	0.796559
LSS1_94.FIN2	74.7	1.332	1.992	0.043	0.1895	0.0033	0.52532	1112	15	1118	18	1101	40	1101	40	1.54405
LSS1_95.FIN2	87.3	1.967	1.973	0.053	0.186	0.0031	0.34827	1104	18	1099	17	1115	53	1115	53	1.43498
LSS1_96.FIN2	211.9	0.665	1.372	0.027	0.1436	0.002	0.38184	876	12	865	11	900	40	900	40	3.88889
LSS1_97.FIN2	770	3.23	1.456	0.02	0.1468	0.0017	0.7659	911.3	8.4	882.6	9.3	986	19	986	19	10.4868
LSS1_98.FIN2	71.6	2.53	0.755	0.031	0.0897	0.0018	0.33135	571	18	554	11	622	86	554	11	2.97723
LSS1_99.FIN2	274	2.1	0.4666	0.0096	0.0613	0.00082	0.36875	388.1	6.7	383.5	5	403	46	383.5	5	1.18526
LSS1_100.FIN2	551	12.4	0.715	0.035	0.0876	0.0035	0.59428	552	23	546	18	589	90	546	18	1.08696
LSS1_101.FIN2	90.8	0.3946	5.39	0.11	0.3394	0.0059	0.78414	1879	18	1882	29	1883	24	1883	24	0.0531067
LSS1_102.FIN2	221	1.347	1.086	0.033	0.123	0.003	0.53624	745	16	747	17	733	56	747	17	0.268456
LSS1_103.FIN2	108	1.038	1.876	0.045	0.1788	0.0024	0.50538	1071	16	1060	13	1088	41	1088	41	2.57353
LSS1_104.FIN2	1276	5.01	1.58	0.028	0.1477	0.003	0.87661	961	11	888	17	1142	22	1142	22	22.2417
LSS1_105.FIN2	597	3.47	1.752	0.026	0.1667	0.0023	0.66042	1026.6	9.7	993	13	1098	24	1098	24	9.56284
LSS1_106.FIN2	237.7	3.87	1.869	0.029	0.1801	0.0026	0.6586	1070	9.8	1067	14	1070	26	1070	26	0.280374
LSS1_107.FIN2	47.02	1.816	2.066	0.053	0.1925	0.0026	0.5235	1134	18	1134	14	1120	45	1120	45	1.25
LSS1_108.FIN2	170	2.03	0.653	0.019	0.076	0.0012	0.28917	509	12	472.3	7.1	673	66	472.3	7.1	7.21022
LSS1_109.FIN2	147	1.722	0.406	0.014	0.0544	0.0013	0.26987	344.7	9.7	341.5	7.9	332	73	341.5	7.9	0.928343
LSS1_110.FIN2	187.9	1.699	0.841	0.022	0.094	0.0015	0.31317	620	12	579.1	8.6	764	56	579.1	8.6	6.59677
LSS1_111.FIN2	72.1	0.854	0.862	0.022	0.1023	0.0014	0.22296	630	12	627.4	8.1	619	56	627.4	8.1	0.412698
LSS1_112.FIN2	235	1.82	1.83	0.029	0.1775	0.0022	0.55347	1054	11	1055	11	1055	28	1055	28	0
LSS1_113.FIN2	226.1	0.7412	3.926	0.065	0.2842	0.0038	0.64954	1617	13	1612	19	1624	23	1624	23	0.738916
LSS1_114.FIN2	79.7	0.959	1.676	0.037	0.1575	0.0024	0.27864	999	15	943	14	1119	48	1119	48	15.7283
LSS1_115.FIN2	308	2.66	0.791	0.017	0.0959	0.0013	0.51244	591.1	9.4	590.5	7.8	587	40	590.5	7.8	0.101506
LSS1_116.FIN2	197	2.26	0.973	0.015	0.1125	0.0011	0.32339	688.8	7.6	687.3	6.6	692	32	687.3	6.6	0.21777
LSS1_117.FIN2	161.6	0.506	0.837	0.018	0.0992	0.0013	0.13836	616.4	9.9	609.7	7.4	626	52	609.7	7.4	1.08696
LSS1_118.FIN2	132.4	1.76	0.887	0.036	0.1022	0.003	0.34392	642	20	627	17	689	86	627	17	2.33645
LSS1_119.FIN2	231	0.944	1.175	0.017	0.1313	0.0014	0.42741	789.4	8	795.4	7.8	774	29	795.4	7.8	0.760071
LSS1_120.FIN2	0	no value	no value	NAN	no value	NAN	#VALUE!	no value	NAN	no value	NAN	no value	NAN	#VALUE!	#VALUE!	#VALUE!
LSS1_121.FIN2	62.8	1.642	1.998	0.05	0.1903	0.0031	0.41649	1111	17	1122	17	1094	45	1094	45	2.55941
LSS1_122.FIN2	76.7	1.761	6.84	0.12	0.385	0.0062	0.58307	2089	15	2099	29	2087	25	2087	25	0.574988
LSS1_123.FIN2	343	4.96	0.882	0.014	0.1037	0.0012	0.435	641.2	7.6	636.2	6.9	657	31	636.2	6.9	0.779788
LSS1_124.FIN2	817	7.9	0.716	0.03	0.0882	0.0036	0.66381	547	17	544	21	558	69	544	21	0.548446	Rim
LSS1_124.FIN2	613	3.23	0.831	0.012	0.0998	0.0011	0.2897	613.9	6.5	613.3	6.4	613	33	613.3	6.4	0.0977358	Core
LSS1_125.FIN2	126.8	0.954	0.358	0.016	0.0498	0.0011	0.071239	310	12	313.2	7	281	99	313.2	7	1.03226
LSS1_126.FIN2	604	2.253	4.239	0.085	0.2351	0.0045	0.92187	1678	17	1360	24	2108	14	2108	14	35.4839
LSS1_127.FIN2	401	1.605	1.946	0.027	0.1861	0.0023	0.67227	1095.7	9.3	1100	13	1094	22	1094	22	0.548446
LSS1_128.FIN2	29.65	1.83	0.73	0.047	0.0858	0.0021	0.28894	549	27	530	12	590	130	530	12	3.46084
LSS1_129.FIN2	237	2.026	0.384	0.0092	0.05225	0.00066	0.15616	329.1	6.7	328.3	4.1	324	55	328.3	4.1	0.243087
LSS1_130.FIN2	344	0.765	2.041	0.033	0.1755	0.0024	0.58746	1130	12	1042	13	1309	29	1309	29	20.3972
0	0	0	0	0	0	0	0	0	0	0	0	0	0	#DIV/0!	#DIV/0!	#DIV/0!
Pak1_GSK_1.FIN2	277.5	1.411	0.0443	0.0023	0.0066	0.00013	0.11288	44	2.2	42.4	0.82	129	97	42.4	0.82	3.63636
Pak1_GSK_2.FIN2	310.2	1.394	0.0442	0.0023	0.00664	0.00013	0.063442	43.8	2.2	42.69	0.83	103	99	42.69	0.83	2.53425
Pak1_GSK_3.FIN2	300.8	1.393	0.0426	0.0022	0.00659	0.00012	0.004966	42.3	2.1	42.36	0.75	90	100	42.36	0.75	0.141844
Pak1_GSK_4.FIN2	267	1.426	0.0448	0.0024	0.00668	0.00012	0.12262	44.4	2.3	42.89	0.8	130	100	42.89	0.8	3.4009
Pak1_GSK_5.FIN2	291.6	1.427	0.042	0.0023	0.00669	0.00012	0.049825	41.7	2.3	42.95	0.8	30	110	42.95	0.8	2.9976
Pak1_GSK_6.FIN2	284.2	1.424	0.0431	0.0022	0.00669	0.00014	0.21291	42.8	2.2	42.99	0.87	59	93	42.99	0.87	0.443925
Pak1_GSK_7.FIN2	275.3	1.424	0.046	0.0022	0.00674	0.00012	0.02518	45.6	2.2	43.3	0.76	162	98	43.3	0.76	5.04386
0	0	0	0	0	0	0	0	0	0	0	0	0	0	#DIV/0!	#DIV/0!	#DIV/0!
WCSS1_1.FIN2	450.6	2.52	2.694	0.066	0.2099	0.0035	0.56915	1325	18	1228	18	1483	40	1483	40	17.1949
WCSS1_2.FIN2	96.5	0.849	2.033	0.064	0.1907	0.0047	0.8155	1121	22	1124	26	1117	37	1117	37	0.626679
WCSS1_3.FIN2	72.7	2.39	1.691	0.032	0.1685	0.0024	0.49069	1005	13	1003	13	997	40	997	40	0.601805
WCSS1_4.FIN2	60.9	1.8	0.612	0.021	0.0772	0.0013	0.032673	484	13	479.5	7.6	482	78	479.5	7.6	0.929752
WCSS1_5.FIN2	190.5	0.6646	0.825	0.014	0.09946	0.00091	0.25567	610.1	7.6	611.2	5.3	602	36	611.2	5.3	0.180298
WCSS1_6.FIN2	81.7	1.7	1.779	0.036	0.1747	0.0021	0.24381	1035	13	1038	12	1030	43	1030	43	0.776699
WCSS1_7.FIN2	615	2.124	0.7368	0.0094	0.0906	0.001	0.43256	560.1	5.5	558.7	6	564	28	558.7	6	0.249955
WCSS1_8.FIN2	397.6	9.06	0.756	0.01	0.0923	0.00074	0.41316	571.3	5.8	569	4.4	574	27	569	4.4	0.402591
WCSS1_9.FIN2	136.7	0.3982	7.784	0.09	0.4108	0.0043	0.6673	2206	10	2218	20	2192	16	2192	16	1.18613
WCSS1_10.FIN2	96	2.035	1.863	0.033	0.1809	0.0021	0.48917	1066	12	1072	12	1051	31	1051	31	1.9981
WCSS1_11.FIN2	301.5	2.133	8.91	0.24	0.3508	0.008	0.95644	2321	25	1936	38	2683	14	2683	14	27.842
WCSS1_12.FIN2	246.1	0.797	4.475	0.057	0.3065	0.0035	0.66641	1725	10	1723	17	1721	19	1721	19	0.116212
WCSS1_13.FIN2	266	2.588	2.941	0.036	0.2415	0.0026	0.56457	1390.9	9.2	1394	14	1380	21	1380	21	1.01449
WCSS1_14.FIN2	414	1.487	1.918	0.022	0.184	0.0017	0.45848	1086.6	7.6	1088.5	9.4	1079	22	1079	22	0.880445
WCSS1_15.FIN2	534	8.45	1.896	0.021	0.1827	0.0017	0.65043	1080.6	7.4	1081.3	9.4	1081	18	1081	18	0.0277521
WCSS1_16.FIN2	70.4	2.48	7.37	0.12	0.398	0.005	0.48472	2155	15	2159	23	2147	27	2147	27	0.558919
WCSS1_17.FIN2	601	2.4	0.805	0.043	0.0884	0.0027	0.87788	598	25	546	16	811	55	546	16	8.69565	Rim
WCSS1_17.FIN2	403	0.823	1.62	0.019	0.1629	0.0016	0.59421	977.4	7.5	974.1	8.6	986	21	986	21	1.2069	Core
WCSS1_18.FIN2	21.41	1.35	11.42	0.3	0.475	0.011	0.80448	2551	24	2502	46	2593	29	2593	29	3.50945
WCSS1_19.FIN2	121.5	3.28	2.006	0.042	0.1901	0.0024	0.63575	1115	14	1121	13	1100	32	1100	32	1.90909
WCSS1_20.FIN2	663	2.115	0.51	0.011	0.063	0.0012	0.071612	418	7.6	393.7	7.3	545	48	393.7	7.3	5.8134
WCSS1_21.FIN2	202.8	6.7	0.732	0.013	0.0897	0.00095	0.33015	557.8	7.9	553.7	5.6	560	39	553.7	5.6	0.73503
WCSS1_22.FIN2	48.5	0.883	0.752	0.029	0.0918	0.0015	0.19023	569	16	565.8	9.1	558	78	565.8	9.1	0.56239
WCSS1_23.FIN2	221	1.423	0.574	0.012	0.07424	0.00083	0.36096	459.6	7.9	461.6	5	434	46	461.6	5	0.435161
WCSS1_24.FIN2	78.1	0.2838	0.45	0.018	0.0514	0.0012	0.47503	374	13	322.9	7.6	669	77	322.9	7.6	13.6631
WCSS1_25.FIN2	600	19	0.692	0.019	0.0843	0.0014	0.62564	534	11	521.7	8.2	575	45	521.7	8.2	2.30337	Rim
WCSS1_25.FIN2	341.1	3.931	0.872	0.016	0.10371	0.00096	0.46792	635.8	8.8	636.1	5.6	628	36	636.1	5.6	0.0471846	Core
WCSS1_26.FIN2	210.3	2.421	0.901	0.019	0.1061	0.0013	0.48048	653	10	650.2	7.8	652	41	650.2	7.8	0.42879
WCSS1_27.FIN2	133.8	1.21	1.86	0.027	0.18	0.0015	0.30173	1065.3	9.5	1067	8.4	1055	27	1055	27	1.13744
WCSS1_28.FIN2	75.2	1.449	1.574	0.033	0.1611	0.002	0.38519	959	13	963	11	940	40	940	40	2.44681
WCSS1_29.FIN2	108.6	3.9	1.115	0.049	0.1125	0.0027	0.1306	759	23	687	16	960	100	687	16	9.48617	Rim
WCSS1_29.FIN2	399.5	2.25	1.778	0.027	0.1694	0.0018	0.57833	1036.9	9.8	1008.5	9.7	1090	25	1090	25	7.47706	Core
WCSS1_30.FIN2	2156	55.2	1.264	0.067	0.0982	0.0034	0.95496	827	31	604	20	1478	46	DISC	DISC	26.9649	Rim
WCSS1_30.FIN2	479	13.86	6.009	0.062	0.3599	0.0041	0.72547	1976.6	9	1981	19	1964	15	1964	15	0.86558	Core
WCSS1_31.FIN2	503	2.94	0.887	0.019	0.1044	0.0013	0.51235	644	11	639.9	7.5	650	42	639.9	7.5	0.636646
WCSS1_32.FIN2	230.6	1.328	3.845	0.061	0.2499	0.0043	0.78386	1601	13	1437	22	1823	22	1823	22	21.1739	Rim
WCSS1_32.FIN2	194	0.985	5.27	0.15	0.2997	0.0048	0.7486	1861	25	1689	24	2054	37	2054	37	17.7702	Core
WCSS1_33.FIN2	246.3	4.41	2.178	0.025	0.2019	0.0018	0.56873	1173	8.1	1185.1	9.8	1148	20	1148	20	3.23171
WCSS1_34.FIN2	299	0.769	1.749	0.023	0.1726	0.0015	0.56485	1025.6	8.6	1026.2	8.2	1024	23	1024	23	0.214844
WCSS1_35.FIN2	146.2	1.176	0.575	0.016	0.07325	0.0009	0.15969	460	10	455.6	5.4	460	64	455.6	5.4	0.956522
WCSS1_36.FIN2	31	1.84	2.115	0.065	0.1961	0.0035	0.38298	1151	20	1154	19	1131	58	1131	58	2.0336
WCSS1_37.FIN2	602	2.346	0.7407	0.0099	0.09086	0.0008	0.58274	562.2	5.7	560.6	4.7	566	23	560.6	4.7	0.284596
WCSS1_38.FIN2	50.5	2.36	1.736	0.052	0.1706	0.0029	0.50566	1018	19	1015	16	1013	55	1013	55	0.197433
WCSS1_39.FIN2	308	5.04	1.907	0.033	0.1837	0.0022	0.6804	1084	12	1087	12	1072	24	1072	24	1.39925
WCSS1_40.FIN2	196	1.271	0.787	0.017	0.0944	0.0013	0.29684	588.4	9.8	581.5	7.4	626	41	581.5	7.4	1.17267
WCSS1_41.FIN2	550	3.52	0.946	0.012	0.10973	0.00085	0.75544	675.4	6.4	671.2	4.9	687	22	671.2	4.9	0.621854
WCSS1_42.FIN2	222	0.833	0.831	0.017	0.0986	0.0011	0.24653	613.2	9.5	606.3	6.3	634	46	606.3	6.3	1.12524
WCSS1_43.FIN2	128.5	1.3	2.327	0.029	0.209	0.0017	0.39441	1219.5	8.8	1223.1	9.2	1212	24	1212	24	0.915842
WCSS1_44.FIN2	306	2.753	1.767	0.022	0.1692	0.0016	0.4733	1032.7	8	1007.6	8.8	1084	23	1084	23	7.04797
WCSS1_45.FIN2	72.4	2.345	1.758	0.037	0.1733	0.0024	0.43643	1027	14	1030	13	1028	39	1028	39	0.194553
WCSS1_46.FIN2	53.7	3.01	1.887	0.046	0.1814	0.0028	0.46419	1077	16	1074	15	1071	45	1071	45	0.280112
WCSS1_47.FIN2	483	2.164	0.751	0.013	0.0924	0.0011	0.31913	568.2	7.5	569.6	6.3	554	38	569.6	6.3	0.246392
WCSS1_48.FIN2	121.3	3.02	2.327	0.043	0.2052	0.0027	0.6957	1220	13	1203	14	1247	26	1247	26	3.52847
WCSS1_49.FIN2	28.48	1.61	1.739	0.055	0.1724	0.0036	0.38997	1020	20	1024	20	976	65	976	65	4.91803
WCSS1_50.FIN2	161	1.789	1.769	0.026	0.1745	0.0017	0.37979	1032.6	9.5	1036.7	9.2	1019	29	1019	29	1.737
WCSS1_51.FIN2	261.2	0.87	17.25	0.18	0.537	0.0055	0.82172	2947	10	2770	23	3070.3	9.8	3070.3	9.8	9.7808
WCSS1_52.FIN2	351	1.026	0.5481	0.0082	0.07146	0.00064	0.36614	443.2	5.3	444.9	3.8	425	32	444.9	3.8	0.383574
WCSS1_53.FIN2	240.5	30.1	0.848	0.013	0.10128	0.00089	0.31773	622.7	7.1	621.8	5.2	617	32	621.8	5.2	0.144532
WCSS1_54.FIN2	125.1	1.113	7.208	0.081	0.3859	0.0035	0.52092	2136	10	2103	16	2165	18	2165	18	2.86374
WCSS1_55.FIN2	262.5	1.572	12.51	0.11	0.5053	0.0045	0.72876	2642.3	8.4	2635	19	2646	11	2646	11	0.415722
WCSS1_56.FIN2	118	2.69	1.552	0.03	0.16	0.002	0.32424	949	12	957	11	930	42	930	42	2.90323
WCSS1_57.FIN2	35.5	3.7	1.635	0.052	0.1666	0.0032	0.41365	978	20	992	18	966	60	966	60	2.69151
WCSS1_58.FIN2	51.81	1.518	1.554	0.04	0.1558	0.0021	0.39229	948	16	933	12	968	50	968	50	3.6157
WCSS1_59.FIN2	25.8	2.16	1.688	0.067	0.1697	0.0039	0.45783	998	26	1009	22	959	80	959	80	5.21376
WCSS1_60.FIN2	227	4.06	0.613	0.015	0.0777	0.0011	0.57132	484.6	9.4	482.6	6.7	492	50	482.6	6.7	0.412712
WCSS1_61.FIN2	142.2	1.255	0.87	0.017	0.104	0.0011	0.1464	636	9.5	637.9	6.6	612	47	637.9	6.6	0.298742
WCSS1_62.FIN2	112.7	1.251	13.72	0.19	0.5297	0.0063	0.57678	2729	13	2739	27	2717	20	2717	20	0.809717
WCSS1_63.FIN2	89.7	0.547	0.693	0.024	0.0875	0.0016	0.27711	532	14	540.6	9.3	486	74	540.6	9.3	1.61654
WCSS1_64.FIN2	159	0.819	4.974	0.076	0.3257	0.0041	0.80648	1814	13	1816	20	1811	16	1811	16	0.276091
WCSS1_65.FIN2	96	1.083	11.43	0.23	0.4281	0.0075	0.68643	2557	18	2296	34	2765	25	2765	25	16.962
WCSS1_66.FIN2	53.5	1.443	1.674	0.039	0.1661	0.0022	0.29838	995	15	990	12	1003	44	1003	44	1.29611
WCSS1_67.FIN2	143	1.553	2.355	0.038	0.2102	0.0024	0.57469	1229	12	1230	13	1220	28	1220	28	0.819672
WCSS1_68.FIN2	87.5	2.087	2.063	0.036	0.1919	0.0019	0.3817	1134	12	1131	10	1134	34	1134	34	0.26455
WCSS1_69.FIN2	96.5	1.182	2.377	0.036	0.2106	0.0027	0.52955	1234	11	1231	14	1234	28	1234	28	0.243112
WCSS1_70.FIN2	297	3.176	4.051	0.045	0.2942	0.003	0.74131	1643.1	9	1662	15	1612	15	1612	15	3.10174
WCSS1_71.FIN2	282	1.65	1.109	0.033	0.1205	0.002	0.36977	756	16	733	12	809	59	733	12	3.04233
WCSS1_71.FIN2	203.3	1.551	1.146	0.025	0.1281	0.0018	0.40971	774	12	777	10	753	43	777	10	0.387597
WCSS1_72.FIN2	244	2.39	1.658	0.032	0.1659	0.0018	0.28748	990	12	989	10	975	33	975	33	1.4359
WCSS1_73.FIN2	257	1.242	0.601	0.013	0.07724	0.00094	0.34169	478.5	8.8	479.6	5.7	450	49	479.6	5.7	0.229885
WCSS1_74.FIN2	201.5	1.348	0.999	0.016	0.1155	0.0012	0.42894	702.3	8.2	704.5	7.1	686	33	704.5	7.1	0.313256
WCSS1_75.FIN2	98.3	1.075	4.092	0.052	0.2925	0.0027	0.60422	1651	10	1654	14	1638	19	1638	19	0.976801
WCSS1_76.FIN2	420	4.97	0.519	0.011	0.068	0.0011	0.41188	424.2	7.1	423.8	6.9	422	43	423.8	6.9	0.0942951
WCSS1_77.FIN2	131.3	1.807	1.367	0.048	0.1414	0.0027	0.32965	873	20	852	15	911	72	911	72	6.4764
WCSS1_78.FIN2	82.3	0.862	1.639	0.032	0.1641	0.0023	0.40378	982	12	979	13	978	38	978	38	0.102249
WCSS1_79.FIN2	349	3.194	1.011	0.014	0.1159	0.001	0.39586	708.4	6.9	707	5.9	694	26	707	5.9	0.197628
WCSS1_80.FIN2	186.9	1.568	1.351	0.021	0.1381	0.0013	0.34335	866.8	9.2	833.9	7.5	945	32	833.9	7.5	3.79557
WCSS1_81.FIN2	217	5.86	0.823	0.023	0.0961	0.0014	0.43666	609	13	591.3	8.3	666	54	591.3	8.3	2.9064
WCSS1_82.FIN2	178.7	5.04	1.909	0.033	0.1823	0.0021	0.59946	1082	12	1079	11	1092	26	1092	26	1.19048
WCSS1_83.FIN2	252	2.479	1.776	0.02	0.1739	0.0013	0.37729	1035.6	7.3	1033.6	7.4	1031	23	1031	23	0.252182
WCSS1_84.FIN2	141.3	2.711	2.803	0.047	0.2327	0.003	0.48806	1355	12	1348	16	1358	29	1358	29	0.736377
WCSS1_85.FIN2	69.8	1.818	1.511	0.034	0.1556	0.002	0.41569	932	14	932	11	915	42	915	42	1.85792
WCSS1_86.FIN2	102.5	1.31	4.095	0.066	0.2919	0.0035	0.71768	1650	13	1650	18	1654	21	1654	21	0.241838
WCSS1_87.FIN2	149.6	1.731	1.863	0.032	0.1773	0.002	0.40982	1066	12	1052	11	1092	35	1092	35	3.663
WCSS1_88.FIN2	69.9	3.53	2.154	0.041	0.1989	0.0027	0.5514	1165	13	1169	15	1154	31	1154	31	1.29983
WCSS1_89.FIN2	106.8	1.446	0.616	0.018	0.0798	0.0011	0.067058	490	10	494.9	6.3	429	68	494.9	6.3	1
WCSS1_90.FIN2	218	2.689	0.631	0.026	0.07003	0.00091	0.49292	493	15	436.3	5.5	791	81	436.3	5.5	11.501
WCSS1_91.FIN2	101.2	0.81	0.673	0.016	0.0843	0.00097	0.12941	522.9	9.2	521.6	5.7	517	52	521.6	5.7	0.248614
WCSS1_92.FIN2	278	1.651	1.91	0.022	0.1836	0.0017	0.47918	1083.4	7.7	1086.1	9.5	1071	22	1071	22	1.4099
WCSS1_93.FIN2	281.1	1.142	6.002	0.075	0.356	0.0044	0.70018	1975	11	1963	21	1985	17	1985	17	1.10831
WCSS1_94.FIN2	302	0.54	1.989	0.031	0.1876	0.002	0.35959	1111	10	1108	11	1110	28	1110	28	0.18018
WCSS1_95.FIN2	545.7	2.533	2.209	0.029	0.2058	0.0031	0.57738	1183.5	9.2	1206	16	1136	26	1136	26	6.16197
WCSS1_96.FIN2	170.3	0.797	0.81	0.018	0.0949	0.0011	0.23975	603	9.8	584.3	6.5	661	51	584.3	6.5	3.10116
WCSS1_97.FIN2	174	2.3	0.612	0.013	0.07738	0.00074	0.20609	483.4	8.1	480.4	4.4	471	45	480.4	4.4	0.620604
WCSS1_98.FIN2	138.2	2.075	2.216	0.034	0.2011	0.0022	0.63195	1184	11	1181	12	1185	24	1185	24	0.337553
WCSS1_99.FIN2	680	1.841	0.4466	0.0085	0.05988	0.00073	0.33961	374.6	5.9	374.8	4.5	365	41	374.8	4.5	0.0533903
WCSS1_100.FIN2	48.3	0.646	0.804	0.034	0.0972	0.0018	0.2964	594	19	598	11	555	86	598	11	0.673401
WCSS1_101.FIN2	82.7	2.62	1.556	0.033	0.1579	0.0019	0.30134	951	14	945	11	947	43	947	43	0.211193
WCSS1_102.FIN2	141.1	1.779	0.509	0.012	0.06719	0.00075	0.27159	417.6	7.6	419.1	4.5	393	50	419.1	4.5	0.359195
WCSS1_103.FIN2	174.6	1.109	6.734	0.066	0.3795	0.0038	0.75382	2075.9	8.7	2073	18	2077	14	2077	14	0.192585
WCSS1_104.FIN2	366	2.9	0.677	0.017	0.0797	0.0017	0.74865	524	11	494	10	647	37	494	10	5.72519
WCSS1_105.FIN2	47.04	0.971	4.738	0.088	0.3158	0.0048	0.44986	1770	15	1771	23	1775	31	1775	31	0.225352
WCSS1_106.FIN2	185	0.879	4.219	0.056	0.297	0.0033	0.51932	1676	11	1676	17	1676	24	1676	24	0
WCSS1_107.FIN2	594	1.683	0.682	0.01	0.08541	0.00085	0.46964	527.4	6.3	528.3	5.1	517	31	528.3	5.1	0.170648
WCSS1_108.FIN2	417.7	1.762	13.05	0.23	0.5168	0.0083	0.92451	2681	17	2683	36	2678	11	2678	11	0.186706
WCSS1_109.FIN2	142.6	3.151	1.793	0.032	0.1761	0.002	0.54643	1044	12	1045	11	1032	29	1032	29	1.25969
WCSS1_110.FIN2	311	0.764	0.564	0.022	0.0722	0.0017	0.57271	453	14	449	10	466	69	449	10	0.883002
WCSS1_111.FIN2	85.19	1.28	4.526	0.059	0.3087	0.0032	0.41851	1734	11	1734	16	1740	24	1740	24	0.344828
WCSS1_112.FIN2	130.1	1.254	2.229	0.036	0.2034	0.0021	0.42005	1189	11	1193	11	1183	32	1183	32	0.845309
WCSS1_113.FIN2	308.3	1.105	0.701	0.013	0.0864	0.00092	0.44281	540	7.9	534.1	5.4	560	37	534.1	5.4	1.09259
WCSS1_114.FIN2	70	1.897	0.453	0.015	0.0599	0.001	0.031781	377	11	375.2	6.1	383	78	375.2	6.1	0.477454
WCSS1_115.FIN2	192	0.3119	0.628	0.023	0.0752	0.0015	0.44604	494	14	467.5	9.1	609	70	467.5	9.1	5.36437
WCSS1_116.FIN2	310	2.84	0.797	0.013	0.09707	0.00081	0.52654	594	7.3	597.1	4.8	576	30	597.1	4.8	0.521886
WCSS1_117.FIN2	237.7	1.152	0.828	0.012	0.10041	0.00081	0.37863	611.8	6.5	616.7	4.8	596	28	616.7	4.8	0.800915
WCSS1_118.FIN2	63.1	7.3	1.594	0.038	0.161	0.0022	0.6185	964	15	962	12	966	39	966	39	0.414079
WCSS1_119.FIN2	580	21.3	0.926	0.014	0.1065	0.0013	0.4683	665.2	7.5	652.1	7.3	712	31	652.1	7.3	1.96933
WCSS1_120.FIN2	305	1.056	0.5701	0.0086	0.07328	0.00063	0.37148	458.2	5.7	455.9	3.8	463	34	455.9	3.8	0.501964
WCSS1_121.FIN2	135.8	1.508	0.675	0.015	0.08473	0.00089	0.36628	522.3	9.3	524.2	5.3	504	47	524.2	5.3	0.363776
WCSS1_122.FIN2	513	2.494	2	0.02	0.1847	0.0014	0.48894	1115	6.6	1092.4	7.4	1166	17	1166	17	6.31218
WCSS1_123.FIN2	595	24	0.8824	0.0096	0.10502	0.00076	0.46656	642.4	5.3	644.8	4.2	640	21	644.8	4.2	0.373599
WCSS1_124.FIN2	327	1.096	0.4771	0.0079	0.06373	0.00059	0.31668	395.5	5.4	398.2	3.6	376	36	398.2	3.6	0.68268
WCSS1_125.FIN2	284	11.8	1.942	0.044	0.1855	0.0029	0.86192	1093	15	1096	16	1091	24	1091	24	0.458295
WCSS1_126.FIN2	333	2.912	1.833	0.029	0.1796	0.0022	0.80938	1056	10	1064	12	1041	20	1041	20	2.20941
WCSS1_127.FIN2	214	3.18	1.739	0.043	0.1732	0.0033	0.89773	1021	16	1029	18	1002	28	1002	28	2.69461
WCSS1_128.FIN2	160	1.633	11.89	0.094	0.4832	0.0039	0.57063	2594.9	7.5	2540	17	2642	12	2642	12	3.86071
WCSS1_129.FIN2	112.2	1.159	13	0.12	0.5108	0.0044	0.80029	2678.4	8.7	2659	19	2698	12	2698	12	1.44552
WCSS1_130.FIN2	159.7	0.7613	0.816	0.018	0.0973	0.0011	0.15203	605	10	598.4	6.5	624	51	598.4	6.5	1.09091
0	0	0	0	0	0	0	0	0	0	0	0	0	0	#DIV/0!	#DIV/0!	#DIV/0!
GJ1_GSK_1.FIN2	390	48.3	0.805	0.01	0.09815	0.00075	0.3754	599.3	5.6	603.5	4.4	582	25	603.5	4.4	0.700818
GJ1_GSK_2.FIN2	392	52.5	0.788	0.01	0.09661	0.00075	0.2177	589.2	5.7	594.5	4.4	573	28	594.5	4.4	0.899525
GJ1_GSK_3.FIN2	385	45.3	0.8191	0.0096	0.09842	0.00073	0.37796	607	5.3	605.1	4.3	614	24	605.1	4.3	0.313015
GJ1_GSK_4.FIN2	383	40.3	0.8185	0.0094	0.09769	0.00079	0.40392	606.7	5.2	600.8	4.6	632	24	600.8	4.6	0.972474
GJ1_GSK_5.FIN2	389	32.8	0.8008	0.0091	0.09745	0.00077	0.44424	596.8	5.2	599.4	4.5	593	24	599.4	4.5	0.435657
GJ1_GSK_6.FIN2	380	48.1	0.812	0.01	0.09733	0.00066	0.41267	602.9	5.6	598.7	3.9	620	25	598.7	3.9	0.696633
GJ1_GSK_7.FIN2	383	44.3	0.8136	0.0096	0.09765	0.00076	0.4016	603.9	5.4	600.6	4.5	618	25	600.6	4.5	0.546448
GJ1_GSK_8.FIN2	385	43.8	0.8051	0.0098	0.09688	0.00074	0.20569	599.8	5.7	596	4.3	618	27	596	4.3	0.633545
GJ1_GSK_9.FIN2	372	41	0.8139	0.0098	0.09818	0.00084	0.39852	604.1	5.5	603.7	4.9	616	25	603.7	4.9	0.0662142
GJ1_GSK_10.FIN2	375	26	0.8114	0.0097	0.09773	0.00076	0.33285	602.7	5.4	601	4.5	607	25	601	4.5	0.282064
GJ1_GSK_11.FIN2	385	47.6	0.8	0.01	0.0974	0.00077	0.35052	596.3	5.8	599.1	4.5	580	27	599.1	4.5	0.469562
GJ1_GSK_12.FIN2	384	42.3	0.8136	0.0099	0.09817	0.00077	0.40078	603.9	5.5	603.6	4.5	599	25	603.6	4.5	0.0496771
GJ1_GSK_13.FIN2	383	48.7	0.8166	0.0095	0.09805	0.00074	0.40156	605.6	5.3	602.9	4.3	604	24	602.9	4.3	0.445839
GJ1_GSK_14.FIN2	391	38	0.805	0.01	0.0966	0.00073	0.37272	598.8	5.8	594.4	4.3	601	26	594.4	4.3	0.734803
GJ1_GSK_15.FIN2	385	41.1	0.817	0.011	0.09784	0.00079	0.42711	606.3	6.1	601.7	4.6	609	27	601.7	4.6	0.7587
GJ1_GSK_16.FIN2	386	46.3	0.809	0.011	0.0979	0.00088	0.4031	601	6.2	602	5.2	586	28	602	5.2	0.166389
GJ1_GSK_17.FIN2	381	49	0.812	0.01	0.09795	0.00082	0.45091	602.8	5.6	602.3	4.8	600	25	602.3	4.8	0.0829463
GJ1_GSK_18.FIN2	382	35	0.81	0.012	0.0973	0.00091	0.57622	601.4	6.7	598.5	5.3	603	26	598.5	5.3	0.482208
GJ1_GSK_19.FIN2	381	37.9	0.815	0.011	0.09805	0.00077	0.33133	604.4	6.4	602.9	4.5	601	29	602.9	4.5	0.24818
GJ1_GSK_20.FIN2	378	31	0.816	0.011	0.09788	0.00088	0.47984	605.3	5.9	601.9	5.2	615	25	601.9	5.2	0.561705
GJ1_GSK_21.FIN2	388	48.3	0.8071	0.0097	0.09755	0.0008	0.34938	600.2	5.5	600	4.7	598	26	600	4.7	0.0333222
GJ1_GSK_22.FIN2	386	42.5	0.8	0.011	0.09664	0.00087	0.30162	596.3	6.3	594.6	5.1	602	31	594.6	5.1	0.285091
GJ1_GSK_23.FIN2	384	40.6	0.8118	0.0096	0.09724	0.00091	0.39941	603.6	5.2	598.2	5.3	623	25	598.2	5.3	0.894632
GJ1_GSK_24.FIN2	385	45.6	0.81	0.011	0.09765	0.00073	0.3827	601.5	6.3	600.5	4.3	613	29	600.5	4.3	0.166251
GJ1_GSK_25.FIN2	384	51.2	0.803	0.011	0.09857	0.00088	0.49138	598	6.3	605.9	5.2	570	27	605.9	5.2	1.32107
GJ1_GSK_26.FIN2	385	37.4	0.805	0.011	0.09693	0.00078	0.37413	599	6	596.4	4.6	612	28	596.4	4.6	0.434057
GJ1_GSK_27.FIN2	380	41	0.807	0.011	0.09793	0.00085	0.40715	600	6.4	602.2	5	593	28	602.2	5	0.366667
GJ1_GSK_28.FIN2	381	51.3	0.81	0.011	0.09749	0.00082	0.31917	602.1	5.9	599.6	4.8	605	29	599.6	4.8	0.415213
GJ1_GSK_29.FIN2	389	35	0.8	0.01	0.09758	0.00073	0.6019	596.5	5.7	600.1	4.3	587	23	600.1	4.3	0.603521
GJ1_GSK_30.FIN2	384	41.4	0.812	0.011	0.09754	0.00075	0.40372	602.6	6.1	599.9	4.4	611	27	599.9	4.4	0.448058
GJ1_GSK_31.FIN2	381	41.9	0.8098	0.0094	0.09792	0.00078	0.42996	602.4	5.4	602.1	4.6	599	24	602.1	4.6	0.0498008
GJ1_GSK_32.FIN2	385	40	0.8163	0.0096	0.09804	0.00089	0.51665	605.4	5.4	602.8	5.2	611	22	602.8	5.2	0.429468
GJ1_GSK_33.FIN2	386	55.8	0.816	0.011	0.09745	0.00075	0.36663	605.2	6	599.4	4.4	625	27	599.4	4.4	0.958361
GJ1_GSK_34.FIN2	383	48.4	0.806	0.01	0.09777	0.00068	0.31622	599.8	5.7	601.3	4	587	27	601.3	4	0.250083
GJ1_GSK_35.FIN2	383	34.1	0.8172	0.0098	0.09774	0.00079	0.26246	605.9	5.5	601.1	4.7	616	28	601.1	4.7	0.79221
GJ1_GSK_36.FIN2	393	60.1	0.807	0.01	0.09676	0.00075	0.32176	599.9	5.7	595.4	4.4	613	27	595.4	4.4	0.750125
GJ1_GSK_37.FIN2	388	49.3	0.8	0.011	0.0972	0.00084	0.35416	596.6	6.4	597.9	5	585	30	597.9	5	0.217901
GJ1_GSK_38.FIN2	380	40.1	0.815	0.011	0.09765	0.00086	0.42305	604.6	6.3	600.5	5.1	610	28	600.5	5.1	0.678134
GJ1_GSK_39.FIN2	384	47	0.809	0.01	0.09811	0.00079	0.41331	602.3	5.8	603.3	4.6	590	26	603.3	4.6	0.16603
GJ1_GSK_40.FIN2	380	46.4	0.8094	0.0099	0.09851	0.00081	0.30298	602.2	5.7	605.6	4.7	583	27	605.6	4.7	0.564596
GJ1_GSK_41.FIN2	384	38	0.805	0.01	0.09707	0.00087	0.29966	599.3	5.6	597.1	5.1	594	29	597.1	5.1	0.367095
GJ1_GSK_42.FIN2	383	43	0.806	0.01	0.09805	0.00082	0.44586	599.6	5.7	602.9	4.8	591	27	602.9	4.8	0.550367
GJ1_GSK_43.FIN2	390	43.3	0.8109	0.0099	0.097	0.00083	0.32171	602.4	5.6	596.7	4.9	617	27	596.7	4.9	0.946215
GJ1_GSK_44.FIN2	383	39	0.8075	0.009	0.09751	0.00078	0.37131	600.6	5	599.7	4.6	605	25	599.7	4.6	0.14985
GJ1_GSK_45.FIN2	380	56.6	0.816	0.011	0.09778	0.00086	0.33105	606	6.4	601.3	5.1	617	30	601.3	5.1	0.775578
GJ1_GSK_46.FIN2	381	46.7	0.814	0.01	0.09728	0.00083	0.38023	604	5.6	598.4	4.9	622	26	598.4	4.9	0.927152
GJ1_GSK_47.FIN2	391	48.1	0.808	0.0097	0.09732	0.00072	0.35692	600.8	5.5	598.6	4.2	594	26	598.6	4.2	0.366178
GJ1_GSK_48.FIN2	385	60.1	0.8024	0.0098	0.09782	0.00083	0.36656	597.6	5.6	601.6	4.9	579	27	601.6	4.9	0.669344
GJ1_GSK_49.FIN2	377	43.6	0.807	0.01	0.09784	0.00074	0.4378	600	5.7	601.7	4.4	583	25	601.7	4.4	0.283333
GJ1_GSK_50.FIN2	393	44.1	0.8093	0.0096	0.09746	0.00084	0.42872	601.5	5.4	599.4	4.9	604	25	599.4	4.9	0.349127
GJ1_GSK_51.FIN2	381	48.5	0.8126	0.0093	0.0983	0.00075	0.36192	603.4	5.2	604.4	4.4	584	25	604.4	4.4	0.165728
GJ1_GSK_52.FIN2	377	26	0.804	0.01	0.0971	0.00084	0.30322	598.7	5.9	597.3	4.9	594	28	597.3	4.9	0.23384
GJ1_GSK_53.FIN2	393	47.6	0.802	0.01	0.09764	0.00071	0.25704	597.4	5.6	600.5	4.2	587	27	600.5	4.2	0.518915
GJ1_GSK_54.FIN2	380	42.6	0.81	0.012	0.0974	0.00084	0.39125	601.7	6.5	599.1	5	602	29	599.1	5	0.432109
GJ1_GSK_55.FIN2	380	42	0.814	0.011	0.09749	0.0008	0.53573	604.6	5.8	599.6	4.7	620	24	599.6	4.7	0.826993
GJ1_GSK_56.FIN2	374	31	0.818	0.01	0.09755	0.00078	0.31525	606.1	5.6	600	4.6	621	26	600	4.6	1.00643
GJ1_GSK_57.FIN2	390	40.5	0.814	0.011	0.09785	0.00082	0.42182	603.9	6.3	601.7	4.8	605	28	601.7	4.8	0.364299
GJ1_GSK_58.FIN2	392	37	0.811	0.01	0.09813	0.00084	0.27566	602.3	5.7	603.4	4.9	593	29	603.4	4.9	0.182633
GJ1_GSK_59.FIN2	379	43.7	0.803	0.01	0.09776	0.0008	0.24122	598.5	6	601.2	4.7	589	29	601.2	4.7	0.451128
GJ1_GSK_60.FIN2	384	46.9	0.803	0.011	0.09731	0.00073	0.35221	598	6.1	598.6	4.3	598	29	598.6	4.3	0.100334
GJ1_GSK_61.FIN2	387	34	0.812	0.0093	0.0966	0.00083	0.44195	603.1	5.2	594.4	4.9	637	24	594.4	4.9	1.44255
GJ1_GSK_62.FIN2	392	51.1	0.801	0.01	0.09734	0.00078	0.35916	596.6	5.8	598.8	4.6	585	25	598.8	4.6	0.368756
GJ1_GSK_63.FIN2	376	37	0.821	0.01	0.09835	0.00087	0.40129	607.9	5.8	604.6	5.1	627	27	604.6	5.1	0.542852
GJ1_GSK_64.FIN2	387	37	0.806	0.011	0.09763	0.00079	0.38111	599.6	6.2	600.5	4.6	593	28	600.5	4.6	0.1501
GJ1_GSK_65.FIN2	382	39.8	0.8105	0.0099	0.09795	0.0008	0.30465	602.8	5.4	602.3	4.7	601	27	602.3	4.7	0.0829463
0	0	0	0	0	0	0	0	0	0	0	0	0	0	#DIV/0!	#DIV/0!	#DIV/0!
Plesovice_GSK_1.FIN2	803	7.088	0.3935	0.0052	0.05331	0.00039	0.50113	337.2	3.7	334.8	2.4	347	28	334.8	2.4	0.711744
Plesovice_GSK_2.FIN2	755	7.28	0.3956	0.0053	0.05372	0.00046	0.45105	338.2	3.8	337.3	2.8	342	28	337.3	2.8	0.266115
Plesovice_GSK_3.FIN2	738	6.97	0.4081	0.0057	0.05368	0.00041	0.34203	347.2	4.1	337.1	2.5	405	30	337.1	2.5	2.90899
Plesovice_GSK_4.FIN2	746	7.33	0.4007	0.0057	0.05421	0.00043	0.43143	341.9	4.1	340.3	2.6	350	29	340.3	2.6	0.467973
Plesovice_GSK_5.FIN2	746	7.19	0.4066	0.0054	0.05454	0.00043	0.25831	346.1	3.9	342.3	2.6	367	30	342.3	2.6	1.09795
Plesovice_GSK_6.FIN2	786	6.923	0.4067	0.0062	0.05385	0.00043	0.26082	346.7	4.5	338.1	2.6	387	33	338.1	2.6	2.48053
Plesovice_GSK_7.FIN2	763	6.921	0.4187	0.0063	0.05468	0.00041	0.22277	354.8	4.5	343.1	2.5	413	33	343.1	2.5	3.29763
Plesovice_GSK_8.FIN2	747	6.506	0.4471	0.0085	0.05532	0.00039	0.16278	376.2	6.2	347.1	2.4	552	43	347.1	2.4	7.73525
Plesovice_GSK_9.FIN2	751	7.66	0.3996	0.0053	0.05443	0.00041	0.41748	341.1	3.9	341.6	2.5	342	28	341.6	2.5	0.146585
Plesovice_GSK_10.FIN2	712	8.19	0.4019	0.0056	0.05507	0.0004	0.28076	343.2	4	345.6	2.5	321	31	345.6	2.5	0.699301

## Sheet: Table S5 WSS5 and VSS4
Table S5
Sample Name:								207/235		206/238		207/206		Best age
Grain #	[U] ppm	U/Th	207/235	2σ error	206/238	2σ error	RHO	Age Ma	2σ error	Age (Ma)	2σ error	Age (Ma)	2σ error	(Ma)	2σ error	% Discordance*	Rim/Core
VSS4_1.FIN2	22.99	0.836	2.912	0.08	0.0716	0.0015	0.17886	1379	21	445.3	9	3425	51	DISC	DISC	67.7085
VSS4_2.FIN2	210	4.08	0.625	0.013	0.0789	0.0011	0.51136	492.2	8.1	489.2	6.4	492	40	489.2	6.4	0.609508
VSS4_3.FIN2	36.8	0.775	1.864	0.05	0.1788	0.0026	0.33491	1063	18	1060	14	1051	55	1051	55	0.856327
VSS4_4.FIN2	196.3	1.14	0.778	0.013	0.0929	0.001	0.28818	583.2	7.6	572.5	6	606	37	572.5	6	1.83471
VSS4_5.FIN2	520	1.117	0.425	0.01	0.0539	0.00087	0.37847	359.2	7.3	338.4	5.3	486	50	338.4	5.3	5.79065
VSS4_6.FIN2	227.1	1.594	0.48	0.011	0.06394	0.00072	0.37771	397.1	7.3	399.5	4.3	372	46	399.5	4.3	0.604382
VSS4_7.FIN2	33.79	1.187	2.519	0.061	0.2166	0.0029	0.27364	1276	18	1263	15	1285	49	1285	49	1.71206
VSS4_8.FIN2	147	0.5265	2.33	0.032	0.2067	0.0023	0.31781	1220.1	9.8	1211	12	1233	29	1233	29	1.78427
VSS4_9.FIN2	290	9.2	2.004	0.065	0.1859	0.0044	0.66849	1115	22	1098	24	1144	49	1144	49	4.02098	Rim
VSS4_9.FIN2	235.1	0.741	2.824	0.043	0.2315	0.003	0.59657	1361	12	1345	15	1383	25	1383	25	2.74765	Core
VSS4_10.FIN2	166	0.663	5.005	0.054	0.3264	0.0027	0.56328	1818.6	9.2	1820	13	1810	17	1810	17	0.552486
VSS4_11.FIN2	156.9	0.854	0.927	0.024	0.0822	0.002	0.57599	663	13	510	12	1227	49	DISC	DISC	23.0769
VSS4_12.FIN2	544	2.46	0.489	0.018	0.0632	0.0011	0.27736	408	14	395.1	6.7	472	89	395.1	6.7	3.16176	Rim
VSS4_12.FIN2	284.3	1.536	0.494	0.014	0.0617	0.001	0.28142	406.8	9.4	385.9	6.2	513	61	385.9	6.2	5.13766	Core
VSS4_13.FIN2	543	1.827	0.5538	0.008	0.06047	0.00089	0.029018	447.1	5.2	378.4	5.4	817	43	DISC	DISC	15.3657
VSS4_14.FIN2	742	6.68	0.658	0.03	0.0713	0.0019	0.83104	510	18	444	11	808	58	444	11	12.9412
VSS4_15.FIN2	853	-70	1.086	0.036	0.1209	0.0029	0.70692	746	17	736	17	776	51	736	17	1.34048	Rim
VSS4_15.FIN2	431	1.201	2.197	0.034	0.2028	0.003	0.6707	1182	12	1190	16	1161	26	1161	26	2.49785	Core
VSS4_16.FIN2	544.4	1.878	1.815	0.018	0.1692	0.0012	0.35972	1050.5	6.5	1007.4	6.6	1146	20	1146	20	12.0942	Rim
VSS4_16.FIN2	388.2	2.392	2.099	0.036	0.1907	0.0024	0.53149	1148	12	1125	13	1185	30	1185	30	5.06329	Core
VSS4_17.FIN2	279	1.609	3.338	0.04	0.2586	0.0021	0.76435	1488.9	9.4	1482	11	1499	19	1499	19	1.13409
VSS4_18.FIN2	163.3	2.107	0.465	0.011	0.06193	0.00065	0.044139	386.4	7.7	387.3	3.9	375	56	387.3	3.9	0.232919
VSS4_19.FIN2	369	1.273	0.965	0.016	0.1131	0.0011	0.22448	685.3	8.1	690.6	6.3	661	37	690.6	6.3	0.773384
VSS4_20.FIN2	212.8	1.192	2.266	0.041	0.2061	0.0026	0.81331	1202	12	1208	14	1188	20	1188	20	1.6835
VSS4_21.FIN2	127	1.022	0.817	0.019	0.09796	0.00095	0.16605	606	10	602.4	5.6	606	50	602.4	5.6	0.594059
VSS4_22.FIN2	519	3.32	1.785	0.036	0.1671	0.0025	0.28291	1039	13	996	14	1136	42	1136	42	12.3239
VSS4_23.FIN2	553	0.861	0.4451	0.0079	0.05891	0.00045	0.14119	373.4	5.5	369	2.7	395	40	369	2.7	1.17836
VSS4_24.FIN2	259	0.657	0.588	0.014	0.07507	0.00071	0.35039	470.3	9.3	466.6	4.3	483	50	466.6	4.3	0.786732
VSS4_25.FIN2	526	1.078	0.517	0.012	0.06571	0.0007	0.1885	423.8	7.5	410.3	4.2	496	61	410.3	4.2	3.18546
VSS4_26.FIN2	37.3	0.953	2.394	0.061	0.207	0.0026	0.28968	1236	18	1212	14	1269	50	1269	50	4.49173
VSS4_27.FIN2	149	10.9	1.978	0.049	0.1928	0.0033	0.62135	1107	17	1136	18	1057	49	1057	49	7.47398	Rim
VSS4_27.FIN2	219	1.229	3.057	0.046	0.2498	0.0026	0.54928	1421	12	1437	13	1401	25	1401	25	2.56959	Core
VSS4_28.FIN2	236	1.122	0.583	0.012	0.07297	0.00065	0.29062	465.5	7.6	454	3.9	512	43	454	3.9	2.47046
VSS4_29.FIN2	155.8	1.494	2.217	0.029	0.2022	0.0016	0.26532	1184.8	9	1186.8	8.4	1191	27	1191	27	0.352645
VSS4_30.FIN2	129	1.53	0.604	0.017	0.07809	0.00091	0.13866	478	11	484.6	5.4	435	62	484.6	5.4	1.38075
VSS4_31.FIN2	122.4	0.921	0.841	0.018	0.1013	0.0011	0.42685	618	10	622.1	6.2	603	46	622.1	6.2	0.66343
VSS4_32.FIN2	734	19	0.766	0.014	0.0937	0.0014	0.46368	577.1	8.2	577.6	8.2	583	38	577.6	8.2	0.0866401	Rim
VSS4_32.FIN2	358	0.837	2.536	0.049	0.1872	0.0029	0.65631	1281	14	1106	16	1589	30	1589	30	30.3965	Core
VSS4_33.FIN2	133	0.728	0.589	0.015	0.0756	0.00091	0.3415	468.7	9.8	469.7	5.5	453	54	469.7	5.5	0.213356
VSS4_34.FIN2	510	1.398	0.4335	0.0087	0.05785	0.00095	0.36177	365.2	6.1	362.5	5.8	391	47	362.5	5.8	0.739321
VSS4_35.FIN2	265.3	0.2914	0.886	0.016	0.1055	0.0011	0.40492	644.9	8.1	646.4	6.6	645	35	646.4	6.6	0.232594
VSS4_36.FIN2	174.1	1.547	1.869	0.027	0.1818	0.0017	0.29391	1068.7	9.6	1076.8	9.2	1050	31	1050	31	2.55238
VSS4_37.FIN2	169.8	0.603	0.526	0.012	0.06867	0.00075	0.30901	428.1	7.8	428.1	4.5	422	47	428.1	4.5	0
VSS4_38.FIN2	701	2.106	3.147	0.03	0.2401	0.0033	0.66905	1443.6	7.4	1387	17	1535	19	1535	19	9.64169
VSS4_39.FIN2	69.4	1.32	2.965	0.055	0.2398	0.0034	0.48821	1396	14	1385	17	1430	36	1430	36	3.14685
VSS4_40.FIN2	69.4	2.42	6	0.11	0.3545	0.0054	0.68434	1974	17	1954	26	2010	24	2010	24	2.78607
VSS4_41.FIN2	341	1.23	0.4553	0.0079	0.06092	0.0005	0.20273	380.4	5.6	381.2	3	377	38	381.2	3	0.210305
VSS4_42.FIN2	257.6	1.428	0.4247	0.0097	0.05663	0.00077	0.45098	358.6	6.9	355	4.7	384	47	355	4.7	1.0039
VSS4_43.FIN2	234	1.264	0.863	0.014	0.1051	0.0013	0.40373	630.6	7.5	643.8	7.9	598	37	643.8	7.9	2.09324
VSS4_44.FIN2	235	0.884	0.826	0.017	0.0954	0.001	0.2659	609.8	9.5	587.1	5.9	693	45	587.1	5.9	3.72253
VSS4_45.FIN2	234.6	0.792	1.658	0.029	0.1647	0.0017	0.15072	991	11	982.5	9.4	1013	38	1013	38	3.01086
VSS4_46.FIN2	296.1	7.18	0.4981	0.0099	0.06464	0.0008	0.24121	409.7	6.7	403.7	4.9	432	47	403.7	4.9	1.46449
VSS4_47.FIN2	91.7	1.83	1.551	0.053	0.1611	0.0038	0.32595	948	21	963	21	921	73	921	73	4.56026	Rim
VSS4_47.FIN2	121.8	0.644	3.924	0.095	0.2816	0.0047	0.65501	1616	19	1599	24	1641	33	1641	33	2.55941	Core
VSS4_48.FIN2	258	1.552	3	0.046	0.2459	0.0032	0.55397	1406	12	1417	17	1400	22	1400	22	1.21429
VSS4_49.FIN2	224.6	1.563	0.514	0.012	0.06447	0.00066	0.023637	420.3	8.2	402.7	4	505	59	402.7	4	4.18749
VSS4_50.FIN2	205.5	0.3489	1.775	0.02	0.1746	0.0015	0.43059	1035.5	7.5	1037.2	8.5	1037	23	1037	23	0.0192864
VSS4_51.FIN2	307	2.128	1.761	0.022	0.1748	0.0015	0.54522	1030.2	8.1	1038.1	8.4	1019	22	1019	22	1.87439
VSS4_52.FIN2	406	3.48	0.97	0.012	0.11376	0.00087	0.5092	688	6.3	694.5	5	669	23	694.5	5	0.944767
VSS4_53.FIN2	348	10.82	1.935	0.021	0.1843	0.0016	0.46869	1092.3	7.4	1090.2	8.5	1100	21	1100	21	0.890909
VSS4_54.FIN2	111.4	2.819	2.719	0.036	0.232	0.002	0.29296	1332.1	9.9	1345	10	1314	27	1314	27	2.35921
VSS4_55.FIN2	189	1.165	2.535	0.03	0.2231	0.0025	0.54985	1281.2	8.5	1298	13	1261	21	1261	21	2.93418
VSS4_56.FIN2	118	1.745	2.196	0.033	0.2	0.0019	0.21318	1178	10	1175	10	1192	31	1192	31	1.42617
VSS4_57.FIN2	242	3.31	2.753	0.037	0.2327	0.0022	0.48787	1342	10	1348	12	1337	24	1337	24	0.822737
VSS4_58.FIN2	198	1.012	0.528	0.018	0.0683	0.0012	0.11702	430	12	425.9	7	454	78	425.9	7	0.953488
VSS4_59.FIN2	405	1.965	0.614	0.016	0.0694	0.0014	0.54888	485	10	432.4	8.4	754	47	432.4	8.4	10.8454
VSS4_60.FIN2	726	1.361	0.874	0.017	0.1016	0.0013	0.40191	637.1	9	623.7	7.7	690	39	623.7	7.7	2.10328
VSS4_61.FIN2	211	1.582	2.989	0.071	0.2431	0.0047	0.91087	1401	18	1401	25	1406	18	1406	18	0.355619
VSS4_62.FIN2	376	3.493	1.857	0.044	0.1536	0.0038	0.91108	1062	16	920	21	1379	20	1379	20	33.285
VSS4_63.FIN2	92.3	0.44	1.77	0.031	0.1748	0.0016	0.31032	1034	12	1038.2	8.6	1025	34	1025	34	1.2878
VSS4_64.FIN2	365	0.545	0.3953	0.0076	0.05248	0.00062	0.043006	337.8	5.5	329.7	3.8	397	50	329.7	3.8	2.39787
VSS4_65.FIN2	90.1	1.92	1.704	0.03	0.1699	0.0019	0.3659	1009	11	1011	10	998	35	998	35	1.30261
VSS4_66.FIN2	103	2.097	1.923	0.05	0.1768	0.0029	0.35401	1087	18	1049	16	1158	49	1158	49	9.41278
VSS4_67.FIN2	142.6	0.868	0.761	0.016	0.0902	0.0011	0.17578	573.1	9.2	556.8	6.3	637	47	556.8	6.3	2.84418
VSS4_68.FIN2	482	0.65	0.91	0.011	0.10698	0.00098	0.46666	656.3	5.7	655.1	5.7	662	24	655.1	5.7	0.182843
VSS4_69.FIN2	121.2	0.448	0.531	0.019	0.0681	0.0012	0.18272	430	13	424.3	7	461	80	424.3	7	1.32558
VSS4_70.FIN2	156	0.77	0.85	0.016	0.1022	0.0011	0.3001	624.3	8.8	627.2	6.4	617	39	627.2	6.4	0.46452
VSS4_71.FIN2	439	0.6563	3.885	0.05	0.2731	0.0035	0.73898	1609	11	1556	18	1685	17	1685	17	7.65579
VSS4_72.FIN2	627	0.924	0.374	0.012	0.04966	0.00084	0.19935	322	8.6	312.4	5.1	392	70	312.4	5.1	2.98137
VSS4_73.FIN2	105.9	2.18	3.586	0.068	0.2712	0.0036	0.41573	1545	15	1546	18	1544	34	1544	34	0.129534
VSS4_74.FIN2	155.9	1.681	1.192	0.058	0.1277	0.0026	0.17792	795	27	774	15	850	110	774	15	2.64151
VSS4_75.FIN2	147.7	1.555	1.841	0.027	0.1793	0.0015	0.32701	1058.4	9.8	1063.1	8	1048	30	1048	30	1.44084
VSS4_76.FIN2	301.8	4.58	0.663	0.012	0.08287	0.00092	0.48471	515.5	7.1	513.2	5.5	531	34	513.2	5.5	0.446169
VSS4_77.FIN2	179.3	1.22	2.391	0.027	0.2107	0.0019	0.47161	1238.6	8.2	1232	10	1255	22	1255	22	1.83267
VSS4_78.FIN2	282.1	0.634	0.412	0.021	0.0537	0.0012	0.23748	350	15	336.9	7.6	420	110	336.9	7.6	3.74286
VSS4_79.FIN2	152.3	1.074	0.651	0.015	0.08166	0.00093	0.17921	507.8	9.1	505.9	5.5	506	52	505.9	5.5	0.374163
VSS4_80.FIN2	440	23.2	0.824	0.014	0.0998	0.0012	0.5754	609.3	7.9	614.3	6.8	595	31	614.3	6.8	0.820614
VSS4_81.FIN2	137.4	1.895	3.011	0.052	0.2428	0.003	0.69999	1407	13	1401	15	1426	23	1426	23	1.75316
VSS4_82.FIN2	524	0.838	0.523	0.016	0.0679	0.0013	0.31737	427	11	423.3	7.7	450	72	423.3	7.7	0.866511
VSS4_83.FIN2	67	0.778	5.39	0.076	0.3411	0.0035	0.42017	1882	12	1891	17	1880	25	1880	25	0.585106
VSS4_84.FIN2	26.19	0.587	1.754	0.076	0.1738	0.0047	0.323	1019	28	1032	26	983	87	983	87	4.98474
VSS4_85.FIN2	335	1.357	2.105	0.064	0.155	0.0055	0.89401	1143	21	926	31	1623	28	1623	28	42.9452
VSS4_86.FIN2	69.8	0.602	13.09	0.15	0.5043	0.005	0.65417	2685	11	2631	22	2739	17	2739	17	3.94304
VSS4_87.FIN2	232.7	2.443	2.073	0.033	0.1847	0.0022	0.66474	1138	11	1092	12	1236	23	1236	23	11.6505
VSS4_88.FIN2	98.7	0.918	1.834	0.029	0.1786	0.0018	0.31056	1056	10	1059.2	9.6	1058	32	1058	32	0.113422
VSS4_89.FIN2	49.71	0.808	3.387	0.073	0.273	0.0042	0.55931	1497	17	1558	21	1438	37	1438	37	8.34492
VSS4_90.FIN2	63.3	1.296	1.679	0.039	0.1675	0.002	0.30456	996	15	998	11	1002	44	1002	44	0.399202
VSS4_91.FIN2	132.9	14.5	1.659	0.028	0.1648	0.0021	0.47739	991	11	983	11	1019	32	1019	32	3.53288
VSS4_92.FIN2	52.3	0.4688	1.82	0.047	0.1772	0.003	0.55158	1050	17	1051	16	1060	44	1060	44	0.849057
VSS4_93.FIN2	39.2	1.368	2.038	0.049	0.1903	0.0028	0.39331	1123	16	1122	15	1129	45	1129	45	0.620018
VSS4_94.FIN2	58.19	1.275	1.865	0.046	0.1843	0.0026	0.33719	1065	16	1090	14	1019	50	1019	50	6.96762
VSS4_95.FIN2	146.6	0.983	0.741	0.017	0.0897	0.0012	0.16896	561.4	9.8	553.9	6.8	598	53	553.9	6.8	1.33595
VSS4_96.FIN2	329	10.9	0.783	0.047	0.0861	0.0031	0.84452	586	27	533	18	810	110	533	18	9.04437	Rim
VSS4_96.FIN2	122.5	1.747	1.779	0.037	0.1745	0.0021	0.25633	1036	13	1036	11	1042	42	1042	42	0.575816	Core
VSS4_97.FIN2	19.91	0.973	1.581	0.068	0.1493	0.0048	0.4139	955	28	895	27	1122	89	1122	89	20.2317
VSS4_98.FIN2	44.2	1.499	3.957	0.086	0.2794	0.0049	0.63403	1620	18	1587	25	1686	35	1686	35	5.87189
VSS4_99.FIN2	214	0.844	13.31	0.17	0.5199	0.0067	0.79241	2700	13	2697	28	2716	15	2716	15	0.699558
VSS4_100.FIN2	169.6	0.999	0.75	0.014	0.09295	0.0009	0.19029	567	8	572.9	5.3	552	43	572.9	5.3	1.04056
VSS4_101.FIN2	330	2.133	4.371	0.043	0.3029	0.0023	0.56697	1705.6	8.1	1705	11	1719	16	1719	16	0.814427
VSS4_102.FIN2	86	0.898	3.425	0.048	0.2631	0.0022	0.39873	1508	11	1505	11	1524	24	1524	24	1.24672
VSS4_103.FIN2	598	1.079	0.821	0.019	0.095	0.0015	0.52866	608	11	584.8	8.8	705	44	584.8	8.8	3.81579
VSS4_104.FIN2	55.9	0.3524	0.719	0.026	0.081	0.0012	0.3312	547	16	502.1	7.2	738	76	502.1	7.2	8.20841
VSS4_105.FIN2	268	2.82	0.5117	0.0088	0.06685	0.00053	0.054567	419	5.9	417.1	3.2	431	41	417.1	3.2	0.453461
VSS4_106.FIN2	191.1	1.001	0.783	0.017	0.09411	0.00084	0.050335	585.7	9.4	579.7	4.9	607	49	579.7	4.9	1.02442
VSS4_107.FIN2	1093	4.6	1.323	0.019	0.1282	0.0032	0.67282	855.9	8.1	778	18	1078	38	778	18	9.10153	Rim
VSS4_107.FIN2	118.5	-13.6	1.963	0.04	0.1916	0.0025	0.5375	1101	14	1130	13	1056	34	1056	34	7.00758	Core
VSS4_108.FIN2	272	1.175	0.3933	0.0089	0.05271	0.00055	0.16649	336	6.5	331.1	3.3	376	51	331.1	3.3	1.45833
VSS4_109.FIN2	389	3.56	1.449	0.092	0.1401	0.0068	0.98681	880	41	841	39	985	47	841	39	4.43182
VSS4_110.FIN2	606	0.981	0.907	0.018	0.0759	0.0016	0.55702	654.8	9.8	471.7	9.6	1363	35	DISC	DISC	27.9627
VSS4_111.FIN2	796	1.04	0.3476	0.009	0.04703	0.00094	0.2441	302.8	6.7	296.3	5.8	365	61	296.3	5.8	2.14663	Rim
VSS4_111.FIN2	260	1.527	1.107	0.032	0.1015	0.0018	0.55972	759	17	623	11	1185	51	DISC	DISC	17.9183	Core
VSS4_112.FIN2	81.2	0.799	6.184	0.072	0.3673	0.003	0.50614	2001.6	9.8	2016	14	1992	18	1992	18	1.20482
VSS4_113.FIN2	161.8	0.694	0.813	0.015	0.09584	0.0009	0.16159	603.1	8.2	589.9	5.3	649	41	589.9	5.3	2.18869
VSS4_114.FIN2	135	1.756	4.406	0.046	0.3054	0.0025	0.52096	1713.5	9	1718	12	1726	19	1726	19	0.463499
VSS4_115.FIN2	604	15.8	0.9021	0.0097	0.10756	0.00066	0.22806	652.4	5.2	658.5	3.8	638	24	658.5	3.8	0.935009
VSS4_116.FIN2	307.1	1.363	0.4943	0.0088	0.06458	0.00055	0.1865	408	6.1	403.4	3.4	427	40	403.4	3.4	1.12745
VSS4_117.FIN2	1300	6.95	1.74	0.043	0.1725	0.0038	0.68623	1023	16	1026	21	1027	38	1027	38	0.097371	Rim
VSS4_117.FIN2	161.6	1.099	2.263	0.047	0.2114	0.0023	0.43355	1200	15	1236	12	1137	38	1137	38	8.70712	Core
VSS4_118.FIN2	423	1.316	0.6474	0.0096	0.08183	0.00065	0.26694	506.4	5.9	507	3.9	523	33	507	3.9	0.118483
VSS4_119.FIN2	566	3.04	0.39	0.019	0.0526	0.0011	0.24359	334	14	330.7	6.6	360	110	330.7	6.6	0.988024	Rim
VSS4_119.FIN2	173.5	0.527	0.432	0.028	0.0584	0.0015	0.0025813	364	20	365.7	9.4	360	160	365.7	9.4	0.467033	Core
VSS4_120.FIN2	40.1	1.286	1.841	0.064	0.1786	0.0029	0.4836	1055	23	1059	16	1045	62	1045	62	1.33971
VSS4_121.FIN2	299.2	1.162	0.541	0.013	0.0708	0.00064	0.22802	438.5	8.7	441	3.9	423	53	441	3.9	0.570125
VSS4_122.FIN2	131.3	0.3383	0.907	0.03	0.1	0.0018	0.26626	653	16	614	11	781	68	614	11	5.97243
VSS4_123.FIN2	72.1	1.015	4.135	0.068	0.296	0.0031	0.48651	1661	13	1671	15	1652	26	1652	26	1.15012
VSS4_124.FIN2	138	0.519	5.819	0.079	0.3523	0.004	0.85204	1949	12	1944	20	1962	16	1962	16	0.917431
VSS4_125.FIN2	347	0.758	0.375	0.016	0.0508	0.0011	0.1767	323	12	319.6	6.7	350	100	319.6	6.7	1.05263
VSS4_126.FIN2	69.1	0.955	0.765	0.023	0.0934	0.0013	0.044016	576	14	575.4	7.7	562	73	575.4	7.7	0.104167
VSS4_127.FIN2	224	0.868	1.936	0.024	0.1748	0.0013	0.35527	1092.6	8.3	1038.2	7.4	1204	24	1204	24	13.7708
VSS4_128.FIN2	213.6	2.118	3.326	0.063	0.2599	0.0039	0.78679	1486	15	1489	20	1494	27	1494	27	0.334672
VSS4_129.FIN2	45.2	0.711	0.738	0.028	0.0922	0.0014	0.26516	563	16	568.3	8.2	520	77	568.3	8.2	0.941385
VSS4_130.FIN2	432	26	0.467	0.021	0.0619	0.0018	0.33572	388	14	387	11	398	95	387	11	0.257732	Rim
VSS4_130.FIN2	450	6.51	0.911	0.02	0.098	0.0016	0.39647	657	10	602.4	9.5	861	49	602.4	9.5	8.3105	Core
VSS4_131.FIN2	209.2	1.601	0.4917	0.0098	0.06515	0.00096	0.24621	405.5	6.7	406.8	5.8	406	50	406.8	5.8	0.320592
VSS4_132.FIN2	362	1.629	0.625	0.027	0.0636	0.0038	0.40509	492	17	398	23	970	120	DISC	DISC	19.1057	Rim
VSS4_132.FIN2	353.5	0.991	1.681	0.031	0.1623	0.0026	0.71682	1001	12	969	15	1068	26	1068	26	9.26966	Core
VSS4_133.FIN2	268.5	2.947	0.5146	0.0085	0.06801	0.00065	0.2803	421	5.7	424.1	3.9	404	39	424.1	3.9	0.736342
VSS4_134.FIN2	647	6.82	0.3445	0.0079	0.04753	0.00076	0.33019	300.3	6	299.3	4.6	308	52	299.3	4.6	0.333
VSS4_135.FIN2	558	1.5	2.264	0.034	0.2061	0.0033	0.9323	1199	11	1207	18	1204	21	1204	21	0.249169
VSS4_136.FIN2	275.5	1.45	2.841	0.04	0.232	0.0024	0.53629	1366	11	1345	12	1398	24	1398	24	3.79113
VSS4_137.FIN2	71.8	0.2681	1.747	0.058	0.1691	0.0029	0.27012	1022	21	1007	16	1042	66	1042	66	3.35893
VSS4_138.FIN2	378	0.5962	1.737	0.025	0.1679	0.0019	0.68986	1021.3	9.3	1001	11	1068	22	1068	22	6.27341
VSS4_139.FIN2	199.7	2.407	0.836	0.015	0.1018	0.0011	0.35535	615.6	8.4	624.8	6.6	575	39	624.8	6.6	1.49448
VSS4_140.FIN2	211.8	0.831	3.968	0.045	0.289	0.0028	0.61767	1626.4	9.2	1636	14	1613	16	1613	16	1.42591
VSS4_141.FIN2	255	5.83	2.84	0.045	0.2344	0.0029	0.65395	1366	12	1357	15	1377	24	1377	24	1.45243
VSS4_142.FIN2	98.4	0.837	5.153	0.063	0.3383	0.0036	0.45537	1844	11	1878	17	1807	22	1807	22	3.92916
VSS4_143.FIN2	211.8	1.588	2.429	0.037	0.2099	0.0025	0.5283	1250	11	1228	13	1289	26	1289	26	4.73235
0	0	0	0	0	0	0	0	0	0	0	0	0	0	#DIV/0!	#DIV/0!	#DIV/0!
WSS5_1.FIN2	181	1.01	4.908	0.088	0.3218	0.0056	0.77771	1802	15	1798	27	1805	30	1805	30	0.387812
WSS5_2.FIN2	0.1	no value	no value	NAN	no value	NAN	#VALUE!	no value	NAN	no value	NAN	no value	NAN	#VALUE!	#VALUE!	#VALUE!
WSS5_3.FIN2	293	6.16	0.4776	0.0094	0.06326	0.00058	0.16185	395.6	6.5	395.4	3.5	392	45	395.4	3.5	0.0505561
WSS5_4.FIN2	241.5	3.78	0.4188	0.009	0.05594	0.00072	0.3107	354.4	6.5	350.9	4.4	361	47	350.9	4.4	0.987585
WSS5_5.FIN2	220.1	0.71	0.609	0.012	0.07866	0.0007	0.23538	482	7.5	488.1	4.2	437	43	488.1	4.2	1.26556
WSS5_6.FIN2	106.2	2.54	10.76	0.2	0.4137	0.0071	0.81798	2499	18	2230	32	2723	18	2723	18	18.105
WSS5_7.FIN2	407.8	1.283	0.743	0.011	0.0895	0.001	0.45862	564	6.8	552.3	6.2	599	34	552.3	6.2	2.07447
WSS5_8.FIN2	862	9.15	1.685	0.026	0.1691	0.0023	0.45059	1002	9.7	1007	13	988	31	988	31	1.92308	Rim
WSS5_8.FIN2	173.5	1.841	2.48	0.056	0.2141	0.0032	0.32595	1265	16	1251	17	1278	45	1278	45	2.11268	Core
WSS5_9.FIN2	654	7.66	1.461	0.074	0.141	0.0042	0.73362	912	31	850	24	1048	72	1048	72	18.8931	Rim
WSS5_9.FIN2	247.9	1.635	2.945	0.039	0.2461	0.0028	0.5299	1393	10	1418	15	1344	24	1344	24	5.50595	Core
WSS5_10.FIN2	934	3.56	0.643	0.01	0.06463	0.00057	0.17724	504.1	6.2	403.7	3.4	979	34	DISC	DISC	19.9167
WSS5_11.FIN2	357	4.19	1.804	0.026	0.1781	0.0017	0.52758	1046.2	9.5	1056.6	9.2	1014	25	1014	25	4.20118
WSS5_12.FIN2	462	8	0.825	0.018	0.0986	0.0018	0.78508	610	10	606	10	623	31	606	10	0.655738
WSS5_13.FIN2	75.78	1.101	2.1	0.041	0.1975	0.0023	0.25488	1147	13	1162	12	1112	38	1112	38	4.4964
WSS5_14.FIN2	141.8	1.04	1.912	0.027	0.1828	0.0016	0.44894	1084.9	9.7	1083.4	9.1	1078	27	1078	27	0.500928
WSS5_15.FIN2	284	1.76	0.558	0.015	0.0726	0.001	0.058725	449.7	9.9	451.9	6	423	65	451.9	6	0.489215
WSS5_16.FIN2	36.7	0.789	0.774	0.036	0.0911	0.0028	0.27466	581	21	562	17	630	100	562	17	3.27022
WSS5_17.FIN2	313	2.63	0.878	0.019	0.1034	0.0012	0.41547	639	10	634.4	7.1	648	44	634.4	7.1	0.719875
WSS5_18.FIN2	178.3	2.56	0.545	0.015	0.0703	0.0013	0.50247	441.2	9.5	438	8	424	51	438	8	0.725295
WSS5_19.FIN2	426	8.96	0.515	0.01	0.0621	0.0011	0.41042	421.6	6.9	388.4	6.5	593	44	388.4	6.5	7.87476
WSS5_21.FIN2	108.6	1.02	0.506	0.015	0.0663	0.0011	0.4128	414	10	413.6	6.6	383	62	413.6	6.6	0.0966184
WSS5_22.FIN2	87.3	0.822	0.549	0.018	0.0711	0.001	0.037342	443	11	442.4	6.3	420	76	442.4	6.3	0.13544
WSS5_23.FIN2	308.7	8.01	1.342	0.034	0.1227	0.0035	0.52436	863	15	746	20	1164	53	746	20	13.5574
WSS5_24.FIN2	219	1.263	1.891	0.03	0.1738	0.0024	0.61856	1076	10	1033	13	1160	26	1160	26	10.9483
WSS5_25.FIN2	165.7	1.192	3.39	0.047	0.2564	0.003	0.57841	1500	11	1471	15	1532	22	1532	22	3.98172
WSS5_26.FIN2	102.3	1.177	1.878	0.029	0.182	0.0021	0.45215	1073	11	1077	11	1056	31	1056	31	1.98864
WSS5_27.FIN2	198	2.54	0.879	0.018	0.1012	0.0013	0.44291	638.9	9.5	621.5	7.8	688	41	621.5	7.8	2.72343
WSS5_28.FIN2	221.9	1.798	1.689	0.039	0.1664	0.0033	0.55454	1002	15	992	18	1017	42	1017	42	2.45821
WSS5_29.FIN2	128.6	0.938	0.708	0.028	0.0878	0.0027	0.23357	542	17	542	16	524	98	542	16	0
WSS5_30.FIN2	257	3.17	1.716	0.029	0.1628	0.0027	0.59771	1012	11	972	15	1094	34	1094	34	11.1517
WSS5_31.FIN2	152.6	1.49	0.494	0.019	0.0643	0.0015	0.24558	408	12	401.6	8.8	407	83	401.6	8.8	1.56863
WSS5_32.FIN2	257.5	1.154	0.542	0.013	0.06996	0.00088	0.19274	438.9	8.5	435.9	5.3	436	54	435.9	5.3	0.683527
WSS5_33.FIN2	81.5	0.932	3.191	0.055	0.2559	0.003	0.44201	1453	13	1468	15	1418	34	1418	34	3.52609
WSS5_34.FIN2	445	1.212	0.551	0.014	0.072	0.0017	0.16432	444.8	9.1	448	10	419	68	448	10	0.719424
WSS5_35.FIN2	130.6	2.6	1.659	0.034	0.1662	0.0036	0.53417	993	13	990	20	994	44	994	44	0.402414
WSS5_36.FIN2	318.8	0.915	0.867	0.018	0.1021	0.00095	0.27728	633.1	9.6	626.7	5.5	643	43	626.7	5.5	1.0109
WSS5_37.FIN2	244.5	0.712	0.734	0.025	0.0895	0.0024	0.42997	557	15	553	14	554	73	553	14	0.718133
WSS5_39.FIN2	360.4	1.646	2.372	0.023	0.2098	0.0018	0.44559	1233.3	6.8	1227.7	9.6	1236	18	1236	18	0.671521
WSS5_40.FIN2	157.8	0.995	0.832	0.014	0.10051	0.00085	0.034614	613.3	7.8	617.3	5	582	41	617.3	5	0.652209
WSS5_41.FIN2	186.2	1.186	3.976	0.044	0.2851	0.0025	0.33856	1628.4	9	1617	12	1628	20	1628	20	0.675676
WSS5_42.FIN2	488	2.097	3.202	0.04	0.2538	0.0025	0.68541	1456.4	9.5	1457	13	1444	17	1444	17	0.900277
WSS5_43.FIN2	1290	1.405	0.4105	0.0069	0.05486	0.00066	0.52358	350.2	5.4	344.3	4.1	379	39	344.3	4.1	1.68475	Rim
WSS5_43.FIN2	388	1.894	0.586	0.023	0.0751	0.0012	0.074658	467	15	467	7.4	444	94	467	7.4	0	Core
WSS5_44.FIN2	228.7	1.116	1.321	0.025	0.1412	0.0021	0.58814	854	11	851	12	848	34	848	12	0.351288
WSS5_45.FIN2	271	1.27	1.799	0.024	0.1739	0.0016	0.39035	1044.1	8.5	1033.2	8.7	1055	26	1055	26	2.06635
WSS5_46.FIN2	216	1.954	3.298	0.057	0.2576	0.0031	0.74986	1482	13	1477	16	1484	27	1484	27	0.471698
WSS5_47.FIN2	243	1.326	1.581	0.025	0.1598	0.0018	0.37305	961.5	9.8	955	10	958	32	958	32	0.313152
WSS5_48.FIN2	83.5	0.928	0.814	0.022	0.095	0.0015	0.3015	602	12	584.8	8.6	645	57	584.8	8.6	2.85714
WSS5_49.FIN2	208	3.66	2.039	0.038	0.1919	0.0035	0.5734	1129	12	1130	19	1114	33	1114	33	1.43627
WSS5_50.FIN2	156.3	0.876	0.57	0.013	0.07256	0.0009	0.34439	457.5	8.9	451.5	5.4	469	51	451.5	5.4	1.31148
WSS5_51.FIN2	208.6	1.673	3.438	0.048	0.2616	0.0027	0.76254	1511	11	1498	14	1521	17	1521	17	1.51216
WSS5_52.FIN2	113.5	1.131	0.772	0.018	0.0928	0.0011	0.050161	580	11	571.8	6.6	588	58	571.8	6.6	1.41379
WSS5_53.FIN2	260	4.78	0.912	0.014	0.1076	0.0011	0.31463	657.2	7.4	658.6	6.3	640	33	658.6	6.3	0.213025
WSS5_54.FIN2	236.7	1.009	0.595	0.017	0.0751	0.0015	0.4267	472	11	466.9	8.9	494	54	466.9	8.9	1.08051
WSS5_55.FIN2	64.9	0.863	0.578	0.021	0.0716	0.0015	0.11701	461	13	445.7	9	507	83	445.7	9	3.31887
WSS5_56.FIN2	315.7	1.945	2.703	0.071	0.1956	0.0033	0.568	1328	19	1151	18	1613	40	1613	40	28.6423
WSS5_57.FIN2	159.2	1.809	1.845	0.03	0.1747	0.0023	0.35286	1062	11	1037	13	1104	35	1104	35	6.06884
WSS5_58.FIN2	295	0.867	3.769	0.09	0.2603	0.0059	0.68045	1582	19	1490	30	1702	35	1702	35	12.4559
WSS5_59.FIN2	525	0.7333	0.612	0.011	0.06729	0.00071	0.58321	484.6	7.1	419.8	4.3	786	43	419.8	4.3	13.3719
WSS5_60.FIN2	145	0.846	1.061	0.024	0.1186	0.0016	0.21005	733	12	722.4	9.1	761	53	722.4	9.1	1.44611
WSS5_61.FIN2	231.5	1.626	7.115	0.058	0.3954	0.0029	0.69982	2125.2	7.3	2148	13	2098	11	2098	11	2.38322
WSS5_62.FIN2	132.3	1.483	0.57	0.023	0.0728	0.0012	0.050793	457	15	453	7.5	446	97	453	7.5	0.875274
WSS5_63.FIN2	295	3.48	0.668	0.033	0.0835	0.0028	0.39201	516	19	516	17	513	95	516	17	0	Rim
WSS5_63.FIN2	53.8	2.35	2.95	0.18	0.1909	0.0091	0.49217	1389	47	1125	49	1810	100	1810	100	37.8453	Core
WSS5_64.FIN2	81.9	1.06	3.143	0.066	0.2396	0.0036	0.58694	1438	16	1383	19	1511	33	1511	33	8.47121
WSS5_65.FIN2	267	2.28	0.514	0.019	0.0667	0.0018	0.4498	420	13	416	11	420	76	416	11	0.952381
WSS5_66.FIN2	331	22	0.534	0.05	0.0694	0.004	0.6343	433	33	432	24	420	150	432	24	0.230947	Rim
WSS5_66.FIN2	148.9	1.567	2.024	0.043	0.1913	0.0023	0.34733	1122	15	1128	12	1101	43	1101	43	2.45232	Core
WSS5_67.FIN2	143.2	0.567	0.712	0.021	0.0876	0.0015	0.41138	544	13	541.1	8.9	533	63	541.1	8.9	0.533088
WSS5_68.FIN2	274.6	2.468	1.887	0.027	0.1866	0.0022	0.57437	1077	10	1103	12	1029	25	1029	25	7.19145
WSS5_69.FIN2	343.4	2.846	2.044	0.032	0.1909	0.0023	0.47623	1129	11	1126	13	1132	29	1132	29	0.530035
WSS5_70.FIN2	273	0.674	0.833	0.022	0.0992	0.0019	0.2111	614	12	610	11	630	59	610	11	0.651466
WSS5_71.FIN2	199.6	0.76	0.557	0.024	0.0718	0.0013	0.23757	448	15	447.2	8.1	428	90	447.2	8.1	0.178571
WSS5_72.FIN2	1.25	0.121	10300	2600	80	19	0.92313	8820	300	25300	1800	5080	43	DISC	DISC	398.031
WSS5_73.FIN2	171.1	1.183	3.762	0.078	0.2771	0.0066	0.67001	1587	18	1575	33	1597	36	1597	36	1.37758
WSS5_74.FIN2	72.5	1.385	1.445	0.055	0.1283	0.0032	0.4898	905	23	778	19	1215	66	778	19	14.0331
WSS5_75.FIN2	164.9	3.91	0.64	0.013	0.08047	0.00077	0.08022	501	7.9	498.9	4.6	499	45	498.9	4.6	0.419162
WSS5_76.FIN2	139	1.373	2.29	0.051	0.2057	0.0038	0.49778	1210	16	1205	20	1200	40	1200	40	0.416667
WSS5_77.FIN2	90.2	5.78	1.882	0.059	0.1797	0.0049	0.40341	1071	21	1064	27	1080	65	1080	65	1.48148
WSS5_78.FIN2	202.4	1.032	2.897	0.047	0.223	0.0031	0.81595	1378	12	1297	17	1503	20	1503	20	13.7059
WSS5_79.FIN2	916	8.51	1.882	0.014	0.181	0.0011	0.45577	1075.6	4.9	1072.1	5.9	1076	14	1076	14	0.362454
WSS5_81.FIN2	623	1.419	0.579	0.018	0.0744	0.002	0.5871	463	11	462	12	472	54	462	12	0.215983
WSS5_82.FIN2	88.2	1.77	0.917	0.021	0.1064	0.0014	0.11496	660	12	651.8	8.2	676	53	651.8	8.2	1.24242
WSS5_83.FIN2	114	0.561	0.519	0.015	0.0674	0.001	0.32493	423	10	420.2	6	425	63	420.2	6	0.661939
WSS5_84.FIN2	112.5	1.155	1.682	0.053	0.153	0.0038	0.6552	998	20	917	21	1178	49	1178	49	22.1562
WSS5_85.FIN2	160	1.511	0.877	0.018	0.1043	0.0013	0.29101	638.1	9.8	639.4	7.3	614	45	639.4	7.3	0.20373
WSS5_87.FIN2	128.9	0.646	0.85	0.028	0.079	0.0017	0.36702	625	16	492	11	1132	67	DISC	DISC	21.28
WSS5_88.FIN2	425	0.524	0.46	0.013	0.0556	0.001	0.44793	383.3	9	349	6.4	559	57	349	6.4	8.9486
WSS5_89.FIN2	179.8	1.512	3.927	0.062	0.2303	0.0035	0.73923	1619	13	1335	18	2007	20	2007	20	33.4828
WSS5_90.FIN2	207	0.859	0.84	0.021	0.0981	0.0017	0.46384	617	12	603.3	9.8	649	52	603.3	9.8	2.22042
WSS5_91.FIN2	-0.05	no value	no value	NAN	no value	NAN	#VALUE!	no value	NAN	no value	NAN	no value	NAN	#VALUE!	#VALUE!	#VALUE!
WSS5_93.FIN2	277.7	1.238	0.495	0.014	0.0634	0.0015	0.50896	406.7	9.8	396.1	9.2	458	57	396.1	9.2	2.60634
WSS5_94.FIN2	62.8	1.486	0.723	0.038	0.0899	0.0027	0.063219	550	22	555	16	520	130	555	16	0.909091
WSS5_95.FIN2	383	2.184	1.942	0.045	0.1823	0.0041	0.61415	1094	15	1079	23	1114	37	1114	37	3.14183
WSS5_96.FIN2	103.9	0.943	13.8	0.12	0.5432	0.0041	0.54728	2735.9	8.3	2796	17	2688	13	2688	13	4.01786
WSS5_97.FIN2	131.8	0.67	1.644	0.05	0.1647	0.0031	0.58113	985	19	983	17	1000	48	1000	48	1.7
WSS5_98.FIN2	369.7	4.89	1.894	0.022	0.181	0.0017	0.27882	1078.6	7.7	1072.4	9.2	1085	25	1085	25	1.16129
WSS5_99.FIN2	361	2.67	1.467	0.053	0.1329	0.0034	0.74621	914	22	804	19	1189	47	804	19	12.035
WSS5_100.FIN2	226	1.039	2.056	0.021	0.1934	0.0016	0.22731	1133.2	7	1139.3	8.8	1117	24	1117	24	1.99642
WSS5_101.FIN2	162.9	1.835	1.658	0.024	0.1669	0.0016	0.38813	991.2	9.1	994.9	8.7	981	29	981	29	1.41692
WSS5_102.FIN2	103.9	0.972	0.839	0.023	0.1011	0.0012	0.16642	617	13	620.8	6.9	585	59	620.8	6.9	0.615883
WSS5_103.FIN2	145.3	2.48	2.566	0.05	0.1913	0.0029	0.37873	1289	14	1128	16	1567	37	1567	37	28.0153
WSS5_104.FIN2	191	0.409	0.3505	0.0079	0.04907	0.00053	0.17958	306.7	6.1	308.8	3.2	277	51	308.8	3.2	0.684708
WSS5_105.FIN2	20.73	0.915	0.905	0.085	0.1014	0.0034	0.37714	642	45	622	20	650	180	622	20	3.11526
WSS5_106.FIN2	261.8	0.4009	0.501	0.014	0.06243	0.00077	0.24	411.8	9.4	390.4	4.7	518	62	390.4	4.7	5.1967
WSS5_107.FIN2	269.9	2.21	0.4878	0.0096	0.06288	0.00071	0.38058	402.8	6.5	393.1	4.3	449	43	393.1	4.3	2.40814
WSS5_108.FIN2	139.3	1.277	0.64	0.013	0.08052	0.00075	0.21795	500.9	8.3	499.2	4.5	494	46	499.2	4.5	0.339389
WSS5_109.FIN2	56	1.141	0.889	0.041	0.0995	0.0021	0.38951	646	21	611	13	757	92	611	13	5.41796
WSS5_110.FIN2	186	0.85	0.872	0.023	0.1016	0.0016	0.27932	636	12	623.6	9.2	677	57	623.6	9.2	1.94969
WSS5_111.FIN2	129.1	0.743	3.469	0.054	0.2505	0.003	0.43696	1519	12	1441	15	1627	28	1627	28	11.4321
WSS5_112.FIN2	170	0.933	0.587	0.012	0.06983	0.00068	0.2198	467.9	7.6	435.1	4.1	621	45	435.1	4.1	7.01004
WSS5_113.FIN2	704	13.6	0.932	0.024	0.1011	0.0024	0.31476	668	13	621	14	836	60	621	14	7.03593	Rim
WSS5_113.FIN2	290	6.19	1.896	0.038	0.1372	0.0022	0.64683	1081	14	829	12	1631	30	DISC	DISC	23.3117	Core
WSS5_114.FIN2	288	0.692	0.399	0.012	0.05152	0.00068	0.16623	340.6	8.3	323.8	4.1	449	64	323.8	4.1	4.93247
WSS5_115.FIN2	911	4.68	1.06	0.019	0.0949	0.0015	0.31062	733	9.5	584.1	8.5	1225	39	DISC	DISC	20.3138	Rim
WSS5_115.FIN2	475.9	6.11	1.205	0.023	0.118	0.0019	0.31292	803	10	719	11	1039	42	719	11	10.4608	Core
WSS5_116.FIN2	333	1.791	0.733	0.011	0.08998	0.00078	0.37466	558.1	6.6	555.4	4.6	566	32	555.4	4.6	0.483784
WSS5_117.FIN2	139.3	1.887	0.747	0.029	0.0898	0.0015	0.49281	565	17	554.4	8.9	593	74	554.4	8.9	1.87611
WSS5_118.FIN2	518	1.06	0.537	0.015	0.063	0.0014	0.29697	436.3	9.8	394.1	8.4	670	67	394.1	8.4	9.67224
WSS5_119.FIN2	98.5	0.786	1.586	0.044	0.1609	0.004	0.69287	961	18	961	23	969	49	969	49	0.825593
WSS5_120.FIN2	107.9	0.566	0.823	0.017	0.09885	0.00092	0.2168	607.8	9.4	607.6	5.4	609	44	607.6	5.4	0.0329056
WSS5_121.FIN2	154.5	1.108	6.07	0.055	0.3614	0.003	0.67492	1984.8	8	1988	14	1983	14	1983	14	0.252143
WSS5_122.FIN2	125.1	0.809	4.002	0.059	0.2897	0.0035	0.49728	1634	12	1640	18	1634	24	1634	24	0.367197
WSS5_123.FIN2	229.8	1.56	0.41	0.01	0.05496	0.00079	0.33393	348.1	7.4	344.9	4.8	368	52	344.9	4.8	0.919276
WSS5_124.FIN2	416	38	0.529	0.021	0.0706	0.0023	0.57791	430	14	440	14	385	73	440	14	2.32558	Rim
WSS5_124.FIN2	397	16.1	1.499	0.037	0.1375	0.0033	0.73979	929	15	830	19	1173	35	830	19	10.6566	Core
WSS5_125.FIN2	145.2	2.49	2.153	0.037	0.1998	0.003	0.50202	1164	12	1174	16	1161	32	1161	32	1.11972
WSS5_126.FIN2	144.8	1.495	2.127	0.041	0.1915	0.0037	0.6093	1159	13	1129	20	1224	34	1224	34	7.76144
WSS5_127.FIN2	3.42	0.169	1100	130	9.1	1.1	0.99757	6960	150	14250	830	5107	19	DISC	DISC	179.029
WSS5_128.FIN2	174.2	2.494	3.172	0.045	0.2562	0.0034	0.42142	1449	11	1469	17	1424	28	1424	28	3.16011
WSS5_130.FIN2	326	0.964	0.689	0.019	0.0851	0.0022	0.65259	531	11	526	13	561	47	526	13	0.94162
WSS5_131.FIN2	67.9	0.872	0.765	0.028	0.0934	0.0018	0.17991	573	16	575	10	550	81	575	10	0.34904
WSS5_132.FIN2	51.3	1.253	1.32	0.06	0.1252	0.0036	0.64569	844	26	759	21	1055	73	759	21	10.0711
WSS5_133.FIN2	283	12	0.479	0.019	0.0636	0.0021	0.58642	397	13	397	13	398	70	397	13	0
WSS5_134.FIN2	170.9	0.962	3.971	0.044	0.2912	0.0033	0.48033	1627.1	9	1649	17	1607	22	1607	22	2.61357
WSS5_135.FIN2	423	2.603	0.757	0.019	0.0898	0.002	0.56615	573	10	554	12	637	47	554	12	3.31588
WSS5_137.FIN2	291	1.67	3.283	0.026	0.2582	0.0018	0.51269	1476.3	6.3	1480.5	9.2	1475	14	1475	14	0.372881
WSS5_138.FIN2	73.8	1.437	2.699	0.042	0.2301	0.0024	0.36004	1326	11	1335	13	1313	30	1313	30	1.67555
WSS5_139.FIN2	360	1.524	0.844	0.04	0.0981	0.0029	0.4871	619	23	603	17	675	96	603	17	2.58481
WSS5_140.FIN2	115.8	1.212	0.694	0.027	0.081	0.0018	0.13155	534	16	502	11	660	93	502	11	5.99251
WSS5_141.FIN2	109	1.243	0.858	0.021	0.1024	0.0012	0.2002	627	11	628.3	7.2	611	54	628.3	7.2	0.207337
WSS5_142.FIN2	168.2	0.729	13.89	0.11	0.5312	0.0034	0.58587	2741.5	7.4	2746	14	2741	10	2741	10	0.182415
WSS5_143.FIN2	210.5	0.703	1.737	0.034	0.1703	0.0029	0.47853	1021	13	1013	16	1040	38	1040	38	2.59615
WSS5_144.FIN2	284	4.05	2.006	0.045	0.1843	0.004	0.72123	1118	15	1090	22	1177	36	1177	36	7.39167
WSS5_145.FIN2	140	1.697	3.075	0.036	0.2478	0.0024	0.47356	1424.9	8.9	1427	12	1415	22	1415	22	0.848057
0	0	0	0	0	0	0	0	0	0	0	0	0	0	#DIV/0!	#DIV/0!	#DIV/0!
91500b_2.FIN2	87.2	1.907	1.802	0.038	0.1755	0.0023	0.45522	1044	14	1042	13	1057	39	1057	39	1.41911
91500b_3.FIN2	84.4	1.892	1.845	0.036	0.1764	0.0021	0.27777	1060	13	1047	11	1076	41	1076	41	2.69517
91500b_4.FIN2	82.9	1.912	1.827	0.029	0.1791	0.0019	0.23271	1053	10	1062	10	1023	34	1023	34	3.81232
91500b_5.FIN2	82.8	1.806	1.848	0.033	0.1803	0.002	0.44888	1060	12	1068	11	1041	32	1041	32	2.59366
91500b_6.FIN2	82.6	1.853	1.858	0.032	0.1822	0.0018	0.32344	1064	11	1078.6	9.7	1024	33	1024	33	5.33203
91500b_7.FIN2	79.8	1.83	1.891	0.034	0.1811	0.0019	0.28777	1075	12	1072	10	1069	36	1069	36	0.280636
0	0	0	0	0	0	0	0	0	0	0	0	0	0	#DIV/0!	#DIV/0!	#DIV/0!
GJ1_1.FIN2	377.9	47.2	0.8177	0.0095	0.09736	0.00069	0.21198	606.2	5.3	598.9	4.1	620	25	598.9	4.1	1.20422
GJ1_2.FIN2	375.7	50.3	0.809	0.01	0.09714	0.00076	0.21927	601.3	5.8	597.6	4.4	599	28	597.6	4.4	0.615333
GJ1_3.FIN2	382.5	43.3	0.811	0.01	0.09781	0.00069	0.27673	602.5	5.8	601.5	4.1	585	28	601.5	4.1	0.165975
GJ1_4.FIN2	389.5	45.1	0.813	0.01	0.09767	0.00079	0.34058	603.4	5.8	600.7	4.6	598	27	600.7	4.6	0.447464
GJ1_5.FIN2	386	43	0.8203	0.0099	0.09766	0.00082	0.33032	607.6	5.5	600.6	4.8	618	26	600.6	4.8	1.15207
GJ1_6.FIN2	391.9	48.1	0.8105	0.009	0.09787	0.00083	0.35098	602.9	5.2	601.8	4.9	584	23	601.8	4.9	0.182451
GJ1_7.FIN2	386.6	46.4	0.812	0.01	0.09789	0.00082	0.2848	602.9	5.7	602	4.8	592	28	602	4.8	0.149278
GJ1_8.FIN2	385.2	46.9	0.82	0.01	0.09804	0.00072	0.30967	607.2	5.7	603.4	4.3	604	26	603.4	4.3	0.625823
GJ1_9.FIN2	385.3	44.6	0.8104	0.0095	0.09749	0.00077	0.30843	602.8	5.5	599.6	4.5	608	25	599.6	4.5	0.530856
GJ1_10.FIN2	387.2	45.4	0.8147	0.0097	0.09799	0.00072	0.36697	604.6	5.4	602.6	4.2	596	25	602.6	4.2	0.330797
GJ1_11.FIN2	381	44.9	0.805	0.01	0.09602	0.00092	0.26824	599.4	6	591	5.4	622	30	591	5.4	1.4014
GJ1_12.FIN2	384	51.9	0.813	0.012	0.09794	0.00092	0.4073	603	6.6	602.2	5.4	599	30	602.2	5.4	0.13267
GJ1_13.FIN2	382.3	45.8	0.801	0.012	0.0976	0.001	0.41073	597.2	6.7	599.9	6.1	581	32	599.9	6.1	0.45211
GJ1_14.FIN2	382	47.6	0.813	0.011	0.09848	0.00086	0.44459	603.3	6	605.4	5	598	28	605.4	5	0.348086
GJ1_15.FIN2	379.7	47.3	0.797	0.011	0.09708	0.00086	0.28738	594.2	6	597.2	5.1	581	30	597.2	5.1	0.504881
GJ1_16.FIN2	380.6	42	0.8067	0.0098	0.09731	0.00081	0.40998	600.7	5.7	599.1	4.6	614	24	599.1	4.6	0.266356
GJ1_17.FIN2	388.8	46.1	0.818	0.01	0.09808	0.00081	0.43491	607.3	5.9	603.1	4.7	627	26	603.1	4.7	0.691586
GJ1_18.FIN2	386.1	47.6	0.7982	0.0092	0.09718	0.00077	0.42263	595.3	5.2	597.8	4.5	590	24	597.8	4.5	0.419956
GJ1_19.FIN2	390.4	45.5	0.803	0.011	0.09763	0.00076	0.36053	597.6	6.2	600.4	4.5	590	28	600.4	4.5	0.468541
GJ1_20.FIN2	383.1	46	0.7952	0.0093	0.09681	0.00074	0.26991	594.2	5.2	595.6	4.3	592	27	595.6	4.3	0.235611
GJ1_21.FIN2	384.9	45.5	0.798	0.01	0.09696	0.00085	0.25576	595.1	5.9	596.5	5	590	30	596.5	5	0.235255
GJ1_22.FIN2	383.6	45.5	0.7984	0.0099	0.09795	0.00072	0.31556	595.4	5.6	602.3	4.2	570	27	602.3	4.2	1.15888
GJ1_23.FIN2	382	43.7	0.8274	0.0092	0.09906	0.00066	0.27461	611.7	5.1	608.9	3.9	627	25	608.9	3.9	0.457741
GJ1_24.FIN2	385	47.5	0.8158	0.0095	0.09737	0.00075	0.38563	605.8	5.2	598.9	4.4	633	24	598.9	4.4	1.13899
GJ1_25.FIN2	379.8	46.2	0.826	0.011	0.0982	0.00074	0.31079	611.6	5.8	603.8	4.3	636	27	603.8	4.3	1.27534
GJ1_26.FIN2	384.2	45.9	0.7939	0.0097	0.0968	0.00088	0.12877	592.8	5.5	595.6	5.2	586	31	595.6	5.2	0.472335
GJ1_27.FIN2	387	45.9	0.802	0.011	0.09732	0.00093	0.2542	597.2	6.4	598.6	5.5	599	32	598.6	5.5	0.234427
GJ1_28.FIN2	380.8	46.7	0.803	0.011	0.09708	0.00086	0.30052	597.9	6.1	597.2	5.1	600	31	597.2	5.1	0.117076
GJ1_29.FIN2	384	43.3	0.8078	0.0098	0.09798	0.00085	0.35891	600.6	5.5	602.5	5	606	27	602.5	5	0.31635
GJ1_30.FIN2	384.2	48.9	0.806	0.011	0.09652	0.00084	0.41248	599.5	6.1	593.9	5	629	28	593.9	5	0.934112
GJ1_31.FIN2	394.6	45.1	0.8135	0.0095	0.09763	0.0008	0.24614	603.9	5.3	600.5	4.7	625	28	600.5	4.7	0.563007
GJ1_32.FIN2	381.3	43.6	0.806	0.011	0.09762	0.0008	0.35973	599.5	6.1	600.4	4.7	596	29	600.4	4.7	0.150125
GJ1_33.FIN2	383.2	45.3	0.817	0.012	0.09862	0.00077	0.37344	605.7	6.5	606.3	4.5	607	28	606.3	4.5	0.0990589
GJ1_34.FIN2	386.8	49.3	0.801	0.011	0.09697	0.00093	0.41564	596.9	6.1	597.3	5.3	602	28	597.3	5.3	0.0670129
GJ1_35.FIN2	380.1	47.9	0.813	0.01	0.09781	0.00088	0.26217	603.6	5.8	601.5	5.2	605	31	601.5	5.2	0.347913
GJ1_36.FIN2	383.5	45.3	0.8	0.012	0.09696	0.00095	0.28839	595.8	6.6	596.5	5.6	585	34	596.5	5.6	0.117489
GJ1_37.FIN2	378.4	43.3	0.8033	0.0098	0.09775	0.00096	0.29751	598.1	5.5	601.1	5.6	588	29	601.1	5.6	0.501588
GJ1_38.FIN2	378.7	46.7	0.8232	0.0093	0.0981	0.00082	0.23141	609.3	5.2	603.2	4.8	628	26	603.2	4.8	1.00115
GJ1_39.FIN2	386.9	43.7	0.802	0.01	0.09707	0.00069	0.27763	597.3	5.7	597.2	4	596	28	597.2	4	0.016742
GJ1_40.FIN2	392.4	46.6	0.823	0.01	0.09676	0.00078	0.41751	609.2	5.7	595.9	4.5	654	25	595.9	4.5	2.18319
GJ1_41.FIN2	391.3	48.3	0.8207	0.0092	0.09829	0.00061	0.29555	607.9	5.1	604.3	3.6	607	24	604.3	3.6	0.592203
GJ1_42.FIN2	373.2	43.7	0.8105	0.0098	0.09886	0.00067	0.14343	602.1	5.5	607.7	3.9	567	29	607.7	3.9	0.930078
GJ1_43.FIN2	389.5	47.2	0.797	0.011	0.09655	0.0008	0.37518	595.2	6.5	594.1	4.7	591	29	594.1	4.7	0.184812
GJ1_44.FIN2	391	45.7	0.805	0.01	0.09724	0.00073	0.19239	598.8	5.7	598.2	4.3	586	29	598.2	4.3	0.1002
GJ1_45.FIN2	378.9	48.8	0.8033	0.0095	0.09707	0.00084	0.32265	598.2	5.3	597.1	4.9	589	26	597.1	4.9	0.183885
GJ1_46.FIN2	385.5	47.5	0.808	0.01	0.09756	0.00065	0.29796	600.8	5.6	600.1	3.8	588	27	600.1	3.8	0.116511
GJ1_47.FIN2	386.2	42	0.8138	0.0099	0.09735	0.00069	0.24787	604	5.5	598.8	4	608	27	598.8	4	0.860927
GJ1_48.FIN2	379.7	48.8	0.808	0.011	0.09845	0.00063	0.2046	600.8	6	605.3	3.7	569	29	605.3	3.7	0.749001
GJ1_49.FIN2	383.8	44.3	0.8138	0.0096	0.09781	0.00065	0.34279	604	5.4	601.5	3.8	596	25	601.5	3.8	0.413907
GJ1_50.FIN2	379.6	45.6	0.803	0.01	0.09711	0.00074	0.22373	598	5.6	597.4	4.4	590	28	597.4	4.4	0.100334
GJ1_51.FIN2	390.1	50.1	0.818	0.01	0.09721	0.00076	0.32902	606.6	5.8	598	4.5	622	28	598	4.5	1.41774
GJ1_52.FIN2	378.3	45.5	0.7987	0.0091	0.09771	0.00076	0.13563	595.6	5.1	600.9	4.5	566	27	600.9	4.5	0.889859
GJ1_53.FIN2	391	50.1	0.8025	0.0095	0.09793	0.0008	0.33312	597.7	5.3	602.2	4.7	571	27	602.2	4.7	0.752886
GJ1_54.FIN2	386.3	42.5	0.8036	0.0099	0.09653	0.00071	0.28907	598.3	5.6	594	4.2	608	26	594	4.2	0.718703
GJ1_55.FIN2	386.6	45.9	0.799	0.01	0.09813	0.00076	0.27902	595.6	5.9	603.4	4.5	560	29	603.4	4.5	1.3096
GJ1_56.FIN2	382.9	45	0.82	0.011	0.09881	0.00086	0.26583	607.3	5.9	607.4	5.1	598	29	607.4	5.1	0.0164663
GJ1_57.FIN2	382.2	45.8	0.815	0.011	0.09756	0.00079	0.30945	604.5	6.3	600	4.7	613	29	600	4.7	0.744417
GJ1_58.FIN2	385.5	45.5	0.803	0.01	0.09726	0.00085	0.37724	598.5	5.6	598.3	5	590	27	598.3	5	0.0334169
GJ1_59.FIN2	381.1	46.2	0.816	0.011	0.09774	0.00089	0.29249	604.9	6.2	601.1	5.2	619	32	601.1	5.2	0.628203
GJ1_60.FIN2	387	48.2	0.804	0.011	0.09708	0.00086	0.37521	598.5	5.9	597.2	5.1	597	29	597.2	5.1	0.21721
GJ1_61.FIN2	376.6	47.3	0.82	0.01	0.09902	0.00091	0.33635	607.4	5.8	608.6	5.3	600	28	608.6	5.3	0.197563
GJ1_62.FIN2	381	45.8	0.823	0.0099	0.09755	0.00075	0.35122	609.8	5.4	600	4.4	641	24	600	4.4	1.60708
GJ1_63.FIN2	385	47.1	0.8015	0.0099	0.09696	0.00073	0.31028	597.1	5.6	596.5	4.3	606	26	596.5	4.3	0.100486
GJ1_64.FIN2	386.6	42.2	0.8014	0.0082	0.09835	0.00066	0.18704	597.2	4.6	604.7	3.9	575	25	604.7	3.9	1.25586
GJ1_65.FIN2	384.4	44.6	0.798	0.0094	0.0969	0.00071	0.29674	595.8	5.4	596.2	4.2	596	26	596.2	4.2	0.0671366
GJ1_66.FIN2	388.8	48.2	0.8077	0.0099	0.09693	0.00066	0.39483	600.6	5.5	596.4	3.9	614	24	596.4	3.9	0.699301
GJ1_67.FIN2	383.6	48.4	0.8043	0.0096	0.09837	0.00067	0.16132	598.7	5.4	604.8	3.9	575	28	604.8	3.9	1.01887
GJ1_68.FIN2	390.6	44.4	0.8138	0.0089	0.09703	0.00063	0.19111	604.1	5	597	3.7	623	26	597	3.7	1.1753
GJ1_69.FIN2	387.1	50.6	0.806	0.0084	0.0971	0.00068	0.26769	599.8	4.7	597.3	4	599	24	597.3	4	0.416806
GJ1_70.FIN2	380.3	45.4	0.8097	0.0091	0.09753	0.00069	0.19774	601.8	5.1	599.9	4.1	603	26	599.9	4.1	0.31572
GJ1_71.FIN2	379.8	42.4	0.817	0.0096	0.09742	0.00065	0.33376	605.8	5.4	599.2	3.8	614	24	599.2	3.8	1.08947
GJ1_72.FIN2	381.2	48.4	0.8326	0.0094	0.09877	0.00065	0.26692	614.6	5.2	607.1	3.8	627	25	607.1	3.8	1.22031
0	0	0	0	0	0	0	0	0	0	0	0	0	0	#DIV/0!	#DIV/0!	#DIV/0!
Plesovice1_1.FIN2	419.4	7.55	0.4022	0.0059	0.05426	0.00045	0.33314	342.9	4.2	340.6	2.8	341	32	340.6	2.8	0.670749
Plesovice1_2.FIN2	432.8	7.49	0.405	0.0062	0.05429	0.00041	0.18252	344.9	4.5	340.8	2.5	353	35	340.8	2.5	1.18875
Plesovice1_3.FIN2	442	7.68	0.4009	0.0061	0.0547	0.00041	0.1811	341.9	4.4	343.3	2.5	330	35	343.3	2.5	0.409476
Plesovice1_4.FIN2	479	7.55	0.4043	0.0059	0.05517	0.00038	0.17032	345	4.2	346.5	2.3	339	34	346.5	2.3	0.434783
Plesovice1_5.FIN2	472	7.32	0.4033	0.0058	0.05532	0.0004	0.16919	343.7	4.2	347.1	2.4	308	34	347.1	2.4	0.989235
Plesovice1_6.FIN2	403.7	7.64	0.4057	0.0065	0.05553	0.0004	0.25284	345.3	4.7	348.4	2.4	312	36	348.4	2.4	0.89777
Plesovice1_7.FIN2	420	6.54	0.4071	0.0062	0.05627	0.00043	0.36054	346.4	4.5	352.9	2.6	307	33	352.9	2.6	1.87644
Plesovice1_8.FIN2	462	6.56	0.4108	0.0055	0.05568	0.00043	0.14585	349.1	3.9	349.3	2.6	337	32	349.3	2.6	0.0572902
Plesovice1_9.FIN2	478	6.897	0.4086	0.0055	0.05588	0.00037	0.20642	347.6	4	350.5	2.3	316	31	350.5	2.3	0.834292
Plesovice1_10.FIN2	484	6.96	0.3943	0.0059	0.05431	0.00036	0.13897	337.7	4.2	340.9	2.2	294	35	340.9	2.2	0.947587
Plesovice1_11.FIN2	497	6.844	0.4	0.0058	0.05424	0.00038	0.29433	341.3	4.2	340.5	2.3	334	32	340.5	2.3	0.234398

## Sheet: Table S6 VSS3 and ALSS1
Table S6
Sample Name:								207/235		206/238		207/206		Best age
Grain #	[U] ppm	U/Th	207/235	2σ error	206/238	2σ error	RHO	Age Ma	2σ error	Age (Ma)	2σ error	Age (Ma)	2σ error	(Ma)	2σ error	% Discordance*	Rim/Core
ALSS1_1.FIN2	220.4	0.954	0.84	0.016	0.0978	0.0014	0.51425	617.9	9	601.5	8	671	38	601.5	8	2.65415
ALSS1_2.FIN2	104.5	5.6	0.339	0.02	0.0426	0.0022	0.53594	298	14	271	13	490	110	271	13	9.0604
ALSS1_3.FIN2	91	3.459	6.91	0.24	0.3612	0.0085	0.72062	2090	31	1984	40	2189	43	2189	43	9.36501
ALSS1_4.FIN2	949	8.6	1.37	0.022	0.1101	0.0019	0.7918	874.9	9.2	673	11	1416	23	673	11	23.0769
ALSS1_5.FIN2	76.6	2.044	0.708	0.026	0.0642	0.0021	0.60749	542	16	401	13	1178	64	401	13	26.0148
ALSS1_6.FIN2	455	2.369	2.403	0.049	0.2069	0.0029	0.37772	1241	15	1212	16	1285	40	1285	40	5.68093
ALSS1_8.FIN2	201.1	3.096	2.608	0.077	0.1713	0.0054	0.70074	1299	21	1017	29	1797	41	1797	41	43.4057
ALSS1_9.FIN2	227.7	2.259	2.696	0.056	0.2163	0.005	0.764	1324	15	1261	27	1437	28	1437	28	12.2477
ALSS1_10.FIN2	50.4	0.93	0.559	0.051	0.0657	0.0057	0.61246	447	32	410	34	650	160	410	34	8.2774	Rim
ALSS1_10.FIN2	130.8	3.85	3.339	0.073	0.2342	0.0054	0.5824	1489	17	1356	28	1694	38	1694	38	19.9528	Core
ALSS1_11.FIN2	232.4	2.403	1.799	0.076	0.176	0.0056	0.57546	1037	27	1043	31	1016	65	1016	65	2.65748
ALSS1_12.FIN2	218.9	0.794	0.503	0.024	0.0659	0.0027	0.63815	409	16	411	16	393	80	411	16	0.488998
ALSS1_13.FIN2	140.3	0.941	9.66	0.39	0.394	0.016	0.84635	2384	39	2126	75	2636	38	2636	38	19.3475
ALSS1_14.FIN2	505	2.02	9.18	0.25	0.379	0.011	0.74878	2344	25	2063	50	2613	32	2613	32	21.0486
ALSS1_15.FIN2	154.3	2.049	2.862	0.047	0.2292	0.0024	0.58642	1369	13	1330	13	1435	25	1435	25	7.31707
ALSS1_16.FIN2	93.5	3.18	0.611	0.023	0.0762	0.0027	0.68659	482	15	475	16	530	64	475	16	1.45228
ALSS1_17.FIN2	181.1	1.687	0.84	0.015	0.0991	0.0012	0.39148	618.9	8	608.8	7	649	37	608.8	7	1.63193
ALSS1_19.FIN2	241.5	1.803	0.417	0.012	0.0572	0.0015	0.45575	355.1	9.2	358.3	9.2	339	64	358.3	9.2	0.901155
ALSS1_20.FIN2	236.1	2.78	1.801	0.075	0.1613	0.0072	0.65003	1039	26	961	39	1235	69	1235	69	22.1862
ALSS1_21.FIN2	369	2.06	0.594	0.023	0.0728	0.003	0.56365	473	14	453	18	585	77	453	18	4.22833	Rim
ALSS1_21.FIN2	171	4.98	0.805	0.018	0.0972	0.0018	0.45617	598	10	598	10	603	47	598	10	0	Core
ALSS1_22.FIN2	311	30.1	0.412	0.02	0.0545	0.0023	0.3831	349	15	342	14	400	110	342	14	2.00573	Rim
ALSS1_22.FIN2	131.7	12.6	0.447	0.017	0.0613	0.0015	-0.11191	375	12	383.3	8.9	330	100	383.3	8.9	2.21333	Core
ALSS1_22.FIN2	27.9	2.3	0.66	0.053	0.0828	0.0034	-0.039304	511	32	513	20	460	200	513	20	0.391389	Core
ALSS1_23.FIN2	326	17.96	0.531	0.029	0.0591	0.0018	0.425	431	19	370	11	770	100	370	11	14.1531
ALSS1_24.FIN2	106.3	1.512	4.095	0.098	0.2856	0.0039	0.61598	1651	20	1618	19	1691	37	1691	37	4.31697
ALSS1_25.FIN2	77.3	4.84	5.01	0.23	0.326	0.017	0.56169	1795	42	1810	82	1800	85	1800	85	0.555556
ALSS1_27.FIN2	367	1.125	0.581	0.01	0.0706	0.0011	0.63007	464.4	6.6	439.6	6.5	593	33	439.6	6.5	5.34022
ALSS1_28.FIN2	68.1	21.6	0.367	0.017	0.0515	0.0021	0.47737	316	13	323	13	291	91	323	13	2.21519
ALSS1_29.FIN2	96.7	1.587	5.67	0.15	0.347	0.01	0.63792	1919	23	1913	50	1940	42	1940	42	1.39175
ALSS1_30.FIN2	181.9	1.532	0.918	0.034	0.1066	0.0036	0.66338	657	18	652	21	682	62	652	21	0.761035
ALSS1_31.FIN2	163.4	6.82	0.816	0.014	0.09802	0.00095	0.32885	604.9	7.8	602.7	5.6	622	34	602.7	5.6	0.363696
ALSS1_32.FIN2	397	3.87	0.325	0.013	0.0456	0.0017	0.53985	285	10	287	10	250	72	287	10	0.701754
ALSS1_33.FIN2	203.1	1.882	0.4967	0.0084	0.06564	0.00081	0.3025	409.5	5.5	409.8	4.9	407	39	409.8	4.9	0.0732601
ALSS1_34.FIN2	398	0.915	0.523	0.013	0.06684	0.00083	0.39896	427.6	8.2	417.1	5	479	51	417.1	5	2.45557
ALSS1_35.FIN2	322	5.38	2.29	0.19	0.158	0.0093	0.81831	1201	59	945	52	1705	94	1705	94	44.5748	Rim
ALSS1_35.FIN2	89.7	1.727	5.88	0.12	0.3314	0.005	0.59236	1956	17	1844	24	2079	29	2079	29	11.3035	Core
ALSS1_36.FIN2	238	4.84	1.965	0.071	0.1867	0.0071	0.60401	1096	24	1099	38	1113	61	1113	61	1.25786
ALSS1_37.FIN2	155.6	3.19	1.113	0.049	0.1104	0.0049	0.63169	759	24	674	28	1029	75	674	28	11.1989
ALSS1_38.FIN2	78.3	2.554	1.263	0.036	0.1177	0.0023	0.25853	825	16	717	13	1112	56	717	13	13.0909
ALSS1_39.FIN2	211.9	1.272	0.377	0.012	0.0419	0.0013	0.72891	323.8	9.1	264.4	7.8	776	48	264.4	7.8	18.3447
ALSS1_40.FIN2	124.3	1.467	0.816	0.016	0.0939	0.0016	0.39563	605.7	9.1	578.6	9.2	705	44	578.6	9.2	4.47416
ALSS1_41.FIN2	273	2.655	2.481	0.075	0.2061	0.0053	0.75879	1261	23	1206	28	1362	38	1362	38	11.4537
ALSS1_43.FIN2	412	1.01	0.775	0.037	0.0909	0.0045	0.55667	580	22	561	26	665	95	561	26	3.27586
ALSS1_44.FIN2	117.9	1.522	3.73	0.11	0.2641	0.0075	0.68259	1574	23	1508	38	1654	43	1654	43	8.82709
ALSS1_45.FIN2	104.1	1.783	3.88	0.09	0.2766	0.0057	0.71271	1603	19	1572	29	1663	31	1663	31	5.47204
ALSS1_46.FIN2	806	21.4	0.476	0.016	0.064	0.0019	0.25065	395	11	400	12	389	83	400	12	1.26582
ALSS1_47.FIN2	97.5	1.115	11.83	0.13	0.4771	0.0048	0.68291	2589	11	2513	21	2652	15	2652	15	5.24133
ALSS1_48.FIN2	145.3	1.532	6.88	0.25	0.3345	0.0073	0.8226	2078	31	1856	35	2306	32	2306	32	19.5143
ALSS1_49.FIN2	757	3.15	0.4499	0.009	0.05681	0.00097	0.63206	376.5	6.3	356.1	5.9	511	36	356.1	5.9	5.41833
ALSS1_50.FIN2	1420	24.9	0.449	0.034	0.0547	0.0028	0.77331	376	24	343	17	580	110	343	17	8.7766	Rim
ALSS1_50.FIN2	216.3	1.838	1.637	0.078	0.1379	0.0045	0.76841	982	30	833	26	1332	60	833	26	15.1731	Core
ALSS1_50.FIN2	87	0.809	3.3	0.13	0.2494	0.0056	0.53461	1478	30	1435	29	1520	63	1520	63	5.59211	Core
ALSS1_51.FIN2	192.7	1.689	1.739	0.023	0.1717	0.0021	0.51792	1022.9	8.8	1021	11	1027	25	1027	25	0.584226
ALSS1_52.FIN2	206.1	2.438	5.663	0.048	0.348	0.0026	0.63769	1924.8	7.3	1925	12	1922	12	1922	12	0.156087
ALSS1_53.FIN2	274.8	1.101	3.758	0.062	0.2747	0.0041	0.77915	1582	13	1564	21	1606	20	1606	20	2.61519
ALSS1_54.FIN2	454	1.716	2.076	0.055	0.1934	0.0051	0.89118	1137	18	1139	28	1144	23	1144	23	0.437063
ALSS1_55.FIN2	645	6.67	1.532	0.041	0.1479	0.0032	0.83927	944	17	889	18	1066	31	1066	31	16.6041
ALSS1_56.FIN2	281	1.71	3.696	0.075	0.2582	0.0049	0.72608	1565	16	1479	25	1689	26	1689	26	12.4334
ALSS1_57.FIN2	92	3.26	0.399	0.039	0.0479	0.0038	0.66812	338	28	301	23	590	160	301	23	10.9467	Rim
ALSS1_57.FIN2	25.34	2.121	0.526	0.04	0.0678	0.0021	0.32733	422	26	423	13	370	140	423	13	0.236967	Core
ALSS1_58.FIN2	35.37	1.968	1.658	0.052	0.1575	0.0046	0.44456	990	20	944	25	1092	65	1092	65	13.5531
ALSS1_59.FIN2	233	5.01	0.504	0.035	0.0659	0.0035	0.48362	412	23	411	21	410	130	411	21	0.242718	Rim
ALSS1_59.FIN2	196.9	3.315	0.997	0.034	0.1047	0.0027	0.74829	700	18	641	16	886	47	641	16	8.42857	Core
ALSS1_60.FIN2	125.8	0.568	0.906	0.024	0.1067	0.0023	0.55639	652	13	653	13	633	50	653	13	0.153374
ALSS1_61.FIN2	201	3.31	1.871	0.032	0.1807	0.0033	0.60997	1070	12	1070	18	1068	31	1068	31	0.187266
ALSS1_62.FIN2	103	0.83	1.817	0.037	0.1729	0.0023	0.42202	1050	13	1027	12	1088	37	1088	37	5.60662
ALSS1_63.FIN2	186	1.38	0.84	0.018	0.1025	0.0013	0.37626	619.6	9.9	629.1	7.9	566	45	629.1	7.9	1.53325
ALSS1_64.FIN2	178	3.04	1.248	0.079	0.1097	0.0061	0.52909	819	36	670	36	1250	120	670	36	18.1929	Rim
ALSS1_64.FIN2	96.5	2.452	1.698	0.047	0.1654	0.0029	0.62602	1003	17	986	16	1035	43	1035	43	4.7343	Core
ALSS1_65.FIN2	489	2.71	0.736	0.03	0.0848	0.0031	0.75434	557	17	524	19	691	58	524	19	5.9246
ALSS1_66.FIN2	428	5.21	0.731	0.014	0.0907	0.0015	0.73618	557	8.7	559.2	8.7	543	32	559.2	8.7	0.394973
ALSS1_67.FIN2	135	3.113	2.612	0.036	0.2219	0.0023	0.64901	1302	10	1292	12	1328	22	1328	22	2.71084
ALSS1_68.FIN2	13.69	1.86	0.684	0.057	0.0774	0.0033	0.094684	534	39	480	19	710	190	480	19	10.1124
ALSS1_69.FIN2	235	0.862	0.47	0.015	0.0524	0.001	0.42804	390	10	329.4	6.3	748	61	329.4	6.3	15.5385
ALSS1_70.FIN2	470	3.379	3.645	0.058	0.2452	0.0042	0.85523	1558	13	1412	22	1760	16	1760	16	19.7727
ALSS1_71.FIN2	300.8	2.8	0.505	0.018	0.0655	0.0023	0.69911	414	13	408	14	451	59	408	14	1.44928
ALSS1_72.FIN2	103.3	1.458	0.932	0.033	0.1061	0.0036	0.45874	667	18	649	21	726	73	649	21	2.69865
ALSS1_73.FIN2	150.1	1.75	1.484	0.043	0.1381	0.0038	0.37864	922	18	833	21	1128	65	833	21	9.65293
ALSS1_74.FIN2	236.3	0.883	0.594	0.016	0.0666	0.0012	0.54676	472	10	415.7	7.5	750	49	415.7	7.5	11.928
ALSS1_75.FIN2	602	4.04	0.493	0.023	0.0642	0.0032	0.64853	403	15	400	20	457	82	400	20	0.744417
ALSS1_76.FIN2	129	3.93	0.612	0.021	0.0794	0.0025	0.45311	484	13	492	15	441	77	492	15	1.65289
ALSS1_77.FIN2	201	2.09	4.067	0.064	0.2952	0.0044	0.52535	1646	13	1666	22	1623	28	1623	28	2.64941
ALSS1_78.FIN2	36.5	1.697	0.461	0.026	0.0592	0.0021	0.45422	382	18	370	13	460	100	370	13	3.14136
ALSS1_79.FIN2	189.4	1.595	3.238	0.042	0.2492	0.0024	0.51977	1465	10	1434	12	1509	22	1509	22	4.97018
ALSS1_80.FIN2	125.6	1.328	4.433	0.092	0.2932	0.0043	0.47037	1715	17	1656	22	1785	35	1785	35	7.22689
ALSS1_81.FIN2	205.4	1.78	2.18	0.045	0.1884	0.004	0.47155	1175	14	1112	22	1286	43	1286	43	13.5303
ALSS1_82.FIN2	267	4.45	1.088	0.049	0.0951	0.0042	0.59194	742	24	584	25	1267	75	584	25	21.2938
ALSS1_84.FIN2	223	1.385	0.836	0.013	0.1004	0.0011	0.31187	617.9	6.9	616.7	6.2	615	34	616.7	6.2	0.194206
ALSS1_85.FIN2	222.5	1.996	4.085	0.05	0.2925	0.0032	0.54853	1651	10	1653	16	1649	22	1649	22	0.242571
ALSS1_86.FIN2	55.2	0.428	5.24	0.18	0.32	0.011	0.68732	1843	29	1783	53	1938	48	1938	48	7.99794
ALSS1_87.FIN2	105.9	2.8	10.95	0.28	0.4553	0.0079	0.89515	2509	25	2416	35	2588	22	2588	22	6.64606
ALSS1_89.FIN2	219.6	2.217	0.844	0.037	0.0965	0.0037	0.51946	616	20	593	22	696	82	593	22	3.73377
ALSS1_90.FIN2	230.6	1.338	3.675	0.081	0.2508	0.005	0.73884	1562	18	1440	25	1724	28	1724	28	16.4733
ALSS1_91.FIN2	414	14.24	0.748	0.05	0.0821	0.0038	0.60955	562	29	508	23	770	110	508	23	9.60854
ALSS1_92.FIN2	47.7	0.969	2.032	0.037	0.187	0.0022	0.090552	1123	13	1105	12	1166	41	1166	41	5.23156
ALSS1_93.FIN2	138	1.239	0.834	0.015	0.0986	0.0013	0.53501	615.3	8.4	606.3	7.7	638	37	606.3	7.7	1.4627
ALSS1_94.FIN2	278.6	4.69	0.716	0.028	0.0698	0.0029	0.53332	550	16	435	18	1050	79	435	18	20.9091
ALSS1_96.FIN2	93.6	1.668	1.461	0.055	0.1376	0.0051	0.70063	913	23	829	28	1110	60	829	28	9.20044
ALSS1_97.FIN2	499	3.84	2.507	0.064	0.2162	0.0049	0.67924	1267	19	1260	26	1284	40	1284	40	1.86916
ALSS1_98.FIN2	75.5	1.29	0.872	0.028	0.1035	0.003	0.56431	639	17	634	17	654	73	634	17	0.782473
ALSS1_99.FIN2	561	1.02	0.51	0.016	0.0554	0.0017	0.53475	416	11	347	10	838	62	347	10	16.5865
ALSS1_100.FIN2	436	0.698	0.521	0.011	0.0681	0.0016	0.35876	425.5	7.2	424.8	9.5	422	57	424.8	9.5	0.164512
ALSS1_101.FIN2	283	2.31	0.607	0.025	0.0706	0.0027	0.53101	479	16	439	16	665	84	439	16	8.35073
ALSS1_102.FIN2	238.5	4.03	2.72	0.11	0.1682	0.0067	0.81119	1323	28	999	37	1917	45	1917	45	47.8873
ALSS1_103.FIN2	133.9	9.58	1.34	0.046	0.1242	0.0028	0.548	859	20	754	16	1147	57	754	16	12.2235
ALSS1_104.FIN2	80	1.948	2.162	0.048	0.1973	0.0037	0.38586	1167	15	1160	20	1191	48	1191	48	2.60285
ALSS1_105.FIN2	445	3.5	3.85	0.1	0.2803	0.0048	0.79644	1596	21	1591	24	1607	32	1607	32	0.995644
ALSS1_106.FIN2	97.3	0.657	1.565	0.037	0.1627	0.0028	0.32879	956	15	971	16	929	49	929	49	4.52099
ALSS1_107.FIN2	338	4.06	0.907	0.029	0.1042	0.0036	0.54582	655	16	638	21	709	72	638	21	2.59542
ALSS1_108.FIN2	200.7	1.002	0.823	0.018	0.0978	0.0015	0.29168	608	9.9	601.3	8.8	624	49	601.3	8.8	1.10197
ALSS1_109.FIN2	294	3.66	1.877	0.03	0.1858	0.0027	0.61381	1072	11	1098	15	1025	28	1025	28	7.12195
ALSS1_110.FIN2	497	31.9	0.996	0.023	0.1046	0.0023	0.61474	700	12	641	14	905	43	641	14	8.42857
ALSS1_111.FIN2	977	253	0.4841	0.0074	0.06315	0.00069	0.42268	400.5	5	394.7	4.2	438	32	394.7	4.2	1.44819
ALSS1_112.FIN2	547	6.48	0.403	0.011	0.0541	0.0014	0.56156	343.5	7.7	339.4	8.6	365	54	339.4	8.6	1.1936
ALSS1_114.FIN2	209	1.627	0.3913	0.0091	0.0547	0.00089	0.35478	334.5	6.7	343.2	5.5	277	50	343.2	5.5	2.6009
ALSS1_115.FIN2	838	11.91	0.466	0.01	0.0561	0.0012	0.59196	387.7	6.9	351.5	7.1	610	41	351.5	7.1	9.33712
ALSS1_116.FIN2	466	2.656	0.445	0.011	0.0543	0.0012	0.58067	373.3	7.5	341	7.4	580	44	341	7.4	8.65256
ALSS1_117.FIN2	295	1.894	0.492	0.035	0.0544	0.0038	0.68977	404	23	341	23	790	110	341	23	15.5941	Rim
ALSS1_117.FIN2	337	1.871	0.75	0.026	0.0879	0.0044	0.75012	567	15	542	26	685	70	542	26	4.40917	Core
ALSS1_118.FIN2	279	4.09	0.704	0.013	0.0846	0.0014	0.507	540	8	523.5	8.1	602	41	523.5	8.1	3.05556
ALSS1_119.FIN2	288	1.714	0.809	0.016	0.0965	0.0018	0.52519	600.3	9	594	11	626	41	594	11	1.04948
ALSS1_120.FIN2	250	5.52	0.361	0.02	0.0456	0.0022	0.4881	311	15	287	14	490	110	287	14	7.71704
ALSS1_121.FIN2	181.9	0.622	1.392	0.064	0.1373	0.005	0.49509	879	28	834	30	1034	85	834	30	5.11945
ALSS1_122.FIN2	144.2	2.293	0.824	0.02	0.096	0.0016	0.45399	609	11	590.8	9.7	679	47	590.8	9.7	2.98851
ALSS1_123.FIN2	62.4	1.467	5.77	0.21	0.342	0.013	0.6126	1928	33	1888	62	1977	61	1977	61	4.50177
ALSS1_124.FIN2	143.4	1.54	0.843	0.025	0.0976	0.0023	0.36211	619	13	600	13	697	58	600	13	3.06947
ALSS1_125.FIN2	206	1.989	0.761	0.025	0.0807	0.0023	0.39492	576	15	500	14	885	72	500	14	13.1944
ALSS1_126.FIN2	100.8	2.05	0.581	0.032	0.075	0.0042	0.61133	466	21	465	25	460	100	465	25	0.214592
ALSS1_127.FIN2	148.8	3.1	0.97	0.052	0.1099	0.0058	0.35335	679	26	674	35	730	110	674	35	0.736377
ALSS1_128.FIN2	496	0.657	1.172	0.068	0.1092	0.0064	0.65103	780	32	666	37	1155	92	666	37	14.6154	Rim
ALSS1_128.FIN2	182	2.2	2.36	0.18	0.189	0.014	0.71622	1210	56	1109	77	1420	120	1420	120	21.9014	Core
ALSS1_129.FIN2	570	5.42	1.447	0.025	0.1486	0.003	0.63251	907	11	895	18	943	34	943	34	5.09014
ALSS1_131.FIN2	369	2.53	0.771	0.017	0.0964	0.0022	0.72806	578.4	9.9	593	13	515	41	593	13	2.5242
ALSS1_133.FIN2	984	2.92	2.536	0.048	0.2206	0.0036	0.67838	1280	14	1284	19	1266	28	1266	28	1.4218
ALSS1_134.FIN2	392	1.4	0.551	0.016	0.0686	0.0015	0.61983	445	10	427.7	8.8	527	50	427.7	8.8	3.88764
ALSS1_135.FIN2	146.8	2.56	0.437	0.024	0.056	0.0021	0.34263	367	17	351	13	450	110	351	13	4.35967	Rim
ALSS1_135.FIN2	362	1.252	0.537	0.012	0.07	0.0015	0.45266	436	8.1	436.1	9.2	421	52	436.1	9.2	0.0229358	Core
ALSS1_136.FIN2	417.2	3.09	0.497	0.011	0.0628	0.0012	0.53455	409.3	7.6	392.7	7.1	490	45	392.7	7.1	4.0557
ALSS1_137.FIN2	347.3	1.68	0.574	0.011	0.0699	0.0014	0.37479	459.6	7.3	435.3	8.7	583	47	435.3	8.7	5.28721
ALSS1_138.FIN2	293.9	3.63	1.306	0.042	0.1238	0.0041	0.57288	842	18	751	23	1089	59	751	23	10.8076
ALSS1_139.FIN2	200	4.57	1.56	0.046	0.1572	0.0052	0.53356	948	18	939	29	968	64	968	64	2.99587
ALSS1_140.FIN2	39.47	2.331	2.213	0.059	0.1981	0.0032	0.19473	1180	19	1167	18	1179	57	1179	57	1.01781
0	0	0	0	0	0	0	0	0	0	0	0	0	0	#DIV/0!	#DIV/0!	#DIV/0!
Pak1_1.FIN2	263.2	1.379	0.0426	0.0023	0.00672	0.00019	0.31342	42.2	2.3	43.1	1.2	26	96	43.1	1.2	2.1327
Pak1_2.FIN2	190.1	1.476	0.0452	0.0025	0.00654	0.00015	0.16652	44.8	2.4	42.05	0.96	190	110	42.05	0.96	6.13839
Pak1_3.FIN2	142.2	1.407	0.0497	0.0033	0.00701	0.00018	0.0040349	49.1	3.1	45	1.2	250	130	45	1.2	8.35031
Pak1_4.FIN2	158.2	1.456	0.0432	0.0026	0.00699	0.0002	0.039447	42.9	2.5	44.9	1.3	0	110	44.9	1.3	4.662
Pak1_5.FIN2	221.6	1.457	0.0415	0.0024	0.00664	0.00016	0.24343	41.2	2.3	42.7	1	20	100	42.7	1	3.64078
Pak1_6.FIN2	160.1	1.551	0.0404	0.0025	0.00666	0.00018	0.13419	40.1	2.5	42.8	1.2	-40	110	42.8	1.2	6.73317
Pak1_7.FIN2	161.1	1.456	0.0467	0.0028	0.00668	0.00016	0.043739	46.2	2.7	42.9	1	210	120	42.9	1	7.14286
Pak1_8.FIN2	223.7	1.466	0.043	0.0025	0.00667	0.00015	0.10073	42.6	2.5	42.87	0.98	70	110	42.87	0.98	0.633803
0	0	0	0	0	0	0	0	0	0	0	0	0	0	#DIV/0!	#DIV/0!	#DIV/0!
Plesovice_1.FIN2	871	7.079	0.4015	0.005	0.05417	0.00052	0.20433	342.5	3.6	340	3.2	339	28	340	3.2	0.729927
Plesovice_2.FIN2	690	7.505	0.4025	0.0046	0.05457	0.00046	0.25253	343.3	3.3	342.8	2.7	348	28	342.8	2.7	0.145645
Plesovice_3.FIN2	600	8.76	0.3942	0.0051	0.05369	0.00058	0.31756	337.2	3.7	337.1	3.5	340	31	337.1	3.5	0.029656
Plesovice_4.FIN2	534	8.98	0.399	0.0056	0.05346	0.00053	0.26795	340.6	4	335.7	3.3	370	33	335.7	3.3	1.43864
Plesovice_5.FIN2	561	8.5	0.3905	0.0061	0.05467	0.00062	0.49193	334.4	4.4	343.1	3.8	273	31	343.1	3.8	2.60167
Plesovice_6.FIN2	798	7.67	0.396	0.0054	0.05268	0.00047	0.3564	338.4	3.9	330.9	2.9	381	31	330.9	2.9	2.21631
Plesovice_7.FIN2	852	7.17	0.3842	0.0049	0.05389	0.00065	0.51365	329.8	3.6	338.3	4	283	27	338.3	4	2.57732
Plesovice_8.FIN2	894	6.82	0.3949	0.005	0.0549	0.00059	0.51623	337.7	3.6	344.5	3.6	296	27	344.5	3.6	2.01362
0	0	0	0	0	0	0	0	0	0	0	0	0	0	#DIV/0!	#DIV/0!	#DIV/0!
VSS3_1.FIN2	32.3	0.682	1.727	0.047	0.1713	0.0035	0.34672	1014	17	1018	19	993	55	993	55	2.51762
VSS3_2.FIN2	102.8	1.041	3.984	0.099	0.2841	0.006	0.53053	1623	20	1609	30	1633	42	1633	42	1.46969
VSS3_3.FIN2	119.7	1.758	1.635	0.025	0.1659	0.0019	0.39804	983	10	989	11	945	32	945	32	4.65608
VSS3_4.FIN2	246	1.707	1.916	0.075	0.1608	0.0067	0.91483	1077	27	957	37	1342	31	1342	31	28.6885
VSS3_5.FIN2	127.7	2.6	2.539	0.066	0.2193	0.0048	0.63614	1282	19	1280	26	1286	40	1286	40	0.466563
VSS3_6.FIN2	350	4.2	0.3933	0.007	0.05372	0.0006	0.20545	336.3	5.1	337.3	3.7	308	42	337.3	3.7	0.297354
VSS3_7.FIN2	228.7	3	0.375	0.019	0.0496	0.0022	0.65458	322	14	312	14	374	97	312	14	3.10559
VSS3_8.FIN2	196	1.83	2.24	0.21	0.153	0.013	0.95777	1147	64	909	74	1683	51	1683	51	45.9893
VSS3_9.FIN2	620	2.18	0.582	0.019	0.0734	0.0018	0.6385	464	12	456	11	476	54	456	11	1.72414
VSS3_10.FIN2	218	1.83	3.369	0.04	0.2594	0.0032	0.53243	1495.6	9.3	1486	16	1500	23	1500	23	0.933333
VSS3_11.FIN2	167.2	1.58	0.558	0.014	0.0718	0.0016	0.27918	450	9.2	446.5	9.7	453	61	446.5	9.7	0.777778
VSS3_13.FIN2	98.9	3.51	2.067	0.045	0.1965	0.0038	0.58696	1137	16	1156	21	1095	40	1095	40	5.57078
VSS3_14.FIN2	289.2	1.41	0.868	0.02	0.1013	0.0025	0.67341	634	11	623	14	678	44	623	14	1.73502
VSS3_16.FIN2	157	4.11	1.719	0.038	0.1699	0.004	0.55305	1012	14	1010	22	1004	43	1004	43	0.59761
VSS3_17.FIN2	240.7	1.65	1.793	0.035	0.1777	0.0037	0.58473	1040	13	1053	20	1005	37	1005	37	4.77612
VSS3_18.FIN2	146.3	2.932	2.086	0.037	0.1941	0.0031	0.48505	1143	12	1143	17	1136	35	1136	35	0.616197
VSS3_19.FIN2	328	4.17	1.761	0.036	0.1715	0.0035	0.52285	1029	14	1019	19	1056	38	1056	38	3.50379
VSS3_20.FIN2	255.5	1.227	0.913	0.039	0.104	0.0038	0.59246	653	20	637	22	696	77	637	22	2.45023
VSS3_21.FIN2	338	1.055	0.766	0.026	0.0919	0.0027	0.32066	576	15	566	16	620	81	566	16	1.73611
VSS3_22.FIN2	195	1.235	1.449	0.047	0.1431	0.004	0.68685	905	20	861	22	1002	53	1002	53	14.0719
VSS3_23.FIN2	84	0.657	13.98	0.25	0.56	0.01	0.57279	2747	18	2860	43	2666	28	2666	28	7.27682
VSS3_24.FIN2	654	9.79	2.023	0.033	0.1821	0.0032	0.61216	1121	11	1078	17	1213	29	1213	29	11.1294
VSS3_25.FIN2	102.2	0.992	0.531	0.016	0.0681	0.0017	0.45842	431	11	424	10	457	62	424	10	1.62413
VSS3_26.FIN2	192.9	2.007	0.799	0.024	0.0966	0.0026	0.31313	595	14	594	15	592	72	594	15	0.168067
VSS3_28.FIN2	250.9	19.1	0.846	0.02	0.1004	0.0022	0.50868	621	11	616	13	633	50	616	13	0.805153
VSS3_29.FIN2	296	1.399	7.82	0.33	0.2597	0.0098	0.78455	2192	38	1484	50	2956	40	2956	40	49.797
VSS3_30.FIN2	335.1	20.92	0.3857	0.0092	0.05203	0.00092	0.49988	330.4	6.7	326.9	5.6	348	48	326.9	5.6	1.05932
VSS3_31.FIN2	326	1.647	0.4965	0.008	0.06548	0.00088	0.48252	408.8	5.5	408.8	5.3	405	34	408.8	5.3	0
VSS3_32.FIN2	48.9	0.795	1.993	0.062	0.1886	0.0062	0.61223	1110	21	1110	34	1116	58	1116	58	0.537634
VSS3_33.FIN2	415	9.2	0.987	0.024	0.1109	0.0025	0.58403	696	12	678	14	754	45	678	14	2.58621
VSS3_34.FIN2	314	3.37	2.025	0.053	0.1795	0.0039	0.69843	1119	18	1063	21	1225	36	1225	36	13.2245
VSS3_35.FIN2	269.3	3.87	19.74	0.65	0.546	0.015	0.84499	3065	33	2798	65	3251	28	3251	28	13.9342
VSS3_36.FIN2	550	1.376	0.587	0.017	0.0668	0.002	0.48999	467	11	416	12	725	64	416	12	10.9208
VSS3_37.FIN2	620	80	0.533	0.026	0.0702	0.0035	0.69364	433	17	437	21	416	86	437	21	0.923788	Rim
VSS3_37.FIN2	51.2	0.592	3.74	0.19	0.276	0.011	0.71255	1574	40	1571	57	1578	69	1578	69	0.443599	Core
VSS3_38.FIN2	289	1.223	0.771	0.02	0.0837	0.0022	0.54913	578	11	518	13	824	53	518	13	10.3806
VSS3_39.FIN2	100.7	1.525	4.227	0.091	0.2988	0.0057	0.55738	1677	18	1684	28	1672	36	1672	36	0.717703
VSS3_40.FIN2	1105	8.48	1.727	0.089	0.1561	0.0083	0.53799	1013	33	933	46	1200	100	1200	100	22.25	Rim
VSS3_40.FIN2	404	2.07	2.9	0.12	0.2336	0.009	0.74389	1375	32	1351	47	1418	53	1418	53	4.72496	Core
VSS3_41.FIN2	127	1.342	1.793	0.035	0.1773	0.0032	0.53978	1041	13	1055	18	1014	37	1014	37	4.04339
VSS3_42.FIN2	766	4.21	3.3	0.1	0.1987	0.005	0.71362	1473	23	1166	27	1939	37	1939	37	39.8659
VSS3_43.FIN2	276.8	1.52	0.81	0.018	0.0986	0.002	0.57084	601	10	606	12	582	43	606	12	0.831947
VSS3_44.FIN2	286	2.26	2.256	0.036	0.1994	0.0026	0.71073	1197	12	1172	14	1244	22	1244	22	5.78778
VSS3_45.FIN2	417	3.67	0.3862	0.0098	0.0534	0.0013	0.49132	330.6	7.2	335.1	8	310	55	335.1	8	1.36116
VSS3_46.FIN2	151.5	1.449	4.89	0.1	0.3159	0.0062	0.65713	1795	17	1771	31	1832	29	1832	29	3.32969
VSS3_47.FIN2	192.6	1.44	4.043	0.076	0.2871	0.0043	0.55854	1645	16	1626	21	1671	35	1671	35	2.693
VSS3_48.FIN2	267	2.85	1.306	0.065	0.1051	0.0075	0.70111	847	28	644	43	1442	82	644	43	23.9669	Rim
VSS3_48.FIN2	91.8	2	2.105	0.047	0.1752	0.0034	0.65881	1152	15	1040	19	1362	35	1362	35	23.6417	Core
VSS3_49.FIN2	380	4.04	1.774	0.045	0.1743	0.0045	0.57074	1031	17	1034	25	1041	49	1041	49	0.67243
VSS3_50.FIN2	1095	1.918	0.531	0.012	0.0564	0.0014	0.43923	431.8	7.9	353.5	8.6	880	52	353.5	8.6	18.1334
VSS3_51.FIN2	566	1.095	0.916	0.02	0.1061	0.0017	0.49627	659	11	649.8	9.7	695	42	649.8	9.7	1.39605
VSS3_52.FIN2	156	1.577	1.785	0.053	0.1607	0.0043	0.71127	1035	20	959	24	1210	44	1210	44	20.7438
VSS3_53.FIN2	170.4	14.45	4.26	0.14	0.2964	0.0071	0.57565	1683	29	1672	35	1710	50	1710	50	2.22222
VSS3_54.FIN2	309.2	2.32	1.773	0.041	0.1655	0.0036	0.57822	1032	15	990	19	1140	41	1140	41	13.1579
VSS3_55.FIN2	607	1.957	0.528	0.012	0.0591	0.0012	0.46116	429.1	8.1	369.9	7.5	764	50	369.9	7.5	13.7963
VSS3_56.FIN2	709	3.2	0.3999	0.005	0.05533	0.00058	0.48442	341.3	3.6	347.1	3.5	305	27	347.1	3.5	1.69938
VSS3_57.FIN2	1170	1.89	0.627	0.028	0.05	0.0019	0.59077	492	17	315	12	1427	72	DISC	DISC	35.9756
VSS3_58.FIN2	386	3.3	0.598	0.015	0.0707	0.0019	0.55709	474.3	9.7	440	11	640	53	440	11	7.23171
VSS3_59.FIN2	372.2	1.071	3.226	0.066	0.2547	0.0052	0.60823	1465	16	1464	27	1478	36	1478	36	0.947226
VSS3_60.FIN2	132.5	1.027	6.452	0.088	0.3763	0.0049	0.45008	2038	12	2058	23	2022	26	2022	26	1.78042
VSS3_61.FIN2	264.6	1.01	0.926	0.031	0.1066	0.0023	0.62818	664	16	653	13	706	54	653	13	1.65663
VSS3_62.FIN2	118.1	1.212	0.883	0.024	0.1039	0.0018	0.12196	643	14	637	10	675	71	637	10	0.933126
VSS3_63.FIN2	172	1.647	1.727	0.03	0.1676	0.0031	0.63538	1017	11	998	17	1070	31	1070	31	6.72897
VSS3_64.FIN2	151	1.373	2.155	0.027	0.1983	0.002	0.45807	1165.6	8.7	1166	11	1177	23	1177	23	0.934579
VSS3_65.FIN2	148.9	1.808	0.79	0.018	0.0933	0.0019	0.49494	590	10	575	11	662	50	575	11	2.54237
VSS3_66.FIN2	219	8.4	14.75	0.35	0.53	0.014	0.73983	2793	22	2745	61	2842	33	2842	33	3.41309
VSS3_67.FIN2	81	1.828	2.825	0.043	0.2382	0.0031	0.47621	1360	12	1378	16	1341	29	1341	29	2.75913
VSS3_68.FIN2	407	5.82	0.553	0.011	0.0714	0.001	0.50691	446.1	6.9	444.3	6.3	451	39	444.3	6.3	0.403497
VSS3_69.FIN2	242	1.047	6.82	0.18	0.377	0.011	0.58052	2083	24	2055	52	2129	47	2129	47	3.47581
VSS3_70.FIN2	140	0.829	0.592	0.013	0.076	0.001	0.31559	470.7	8.5	472.4	6.1	462	48	472.4	6.1	0.361164
VSS3_71.FIN2	540	0.993	0.816	0.025	0.0774	0.0017	0.69903	604	14	480	10	1122	45	480	10	20.5298
VSS3_72.FIN2	588	0.866	0.562	0.021	0.0718	0.0018	0.56185	452	13	447	11	486	71	447	11	1.10619
VSS3_73.FIN2	193.8	3.57	2.161	0.033	0.197	0.0022	0.54626	1167	10	1159	12	1193	25	1193	25	2.84996
VSS3_74.FIN2	38.8	1.576	1.542	0.044	0.1468	0.0026	0.47604	943	18	882	15	1089	49	1089	49	19.0083
VSS3_75.FIN2	333	0.893	0.3768	0.0079	0.05027	0.0007	0.42113	324.3	5.8	316.2	4.3	384	44	316.2	4.3	2.49769
VSS3_76.FIN2	119.7	0.81	0.794	0.022	0.0994	0.0022	0.42559	591	12	610	13	521	58	610	13	3.21489
VSS3_77.FIN2	174	1.137	0.503	0.013	0.0663	0.0012	0.47413	412.5	9	413.6	7	398	52	413.6	7	0.266667
VSS3_78.FIN2	271.3	1.78	2.465	0.065	0.2119	0.0045	0.62933	1256	19	1238	24	1294	40	1294	40	4.32767
VSS3_79.FIN2	127	0.867	0.707	0.021	0.0859	0.0018	0.51203	541	13	531	10	577	57	531	10	1.84843
VSS3_80.FIN2	94	2.58	1.892	0.041	0.1791	0.0029	0.73752	1075	14	1062	16	1110	29	1110	29	4.32432
VSS3_81.FIN2	330	1.54	2.242	0.055	0.2048	0.0049	0.67304	1191	17	1200	26	1175	39	1175	39	2.12766
VSS3_82.FIN2	52.99	0.3252	0.839	0.024	0.1011	0.0015	0.2174	618	13	620.7	8.5	564	64	620.7	8.5	0.436893
VSS3_83.FIN2	79.9	2.276	3.421	0.081	0.247	0.0046	0.55531	1505	19	1422	24	1629	38	1629	38	12.7072
VSS3_84.FIN2	266.9	1.46	0.802	0.016	0.0978	0.0014	0.3863	597.2	9.2	602.4	8.4	572	45	602.4	8.4	0.87073
VSS3_85.FIN2	263	1.261	0.522	0.0085	0.06816	0.00083	0.41391	425.9	5.7	425	5	418	35	425	5	0.211317
VSS3_86.FIN2	133.9	2.302	1.713	0.023	0.171	0.002	0.32617	1012.1	8.4	1017	11	996	28	996	28	2.10843
VSS3_87.FIN2	439	4.66	1.302	0.058	0.1091	0.0038	0.68075	844	26	667	22	1338	65	667	22	20.9716	Rim
VSS3_87.FIN2	290	3.32	1.416	0.065	0.1242	0.005	0.65609	893	28	754	29	1251	70	754	29	15.5655	Core
VSS3_87.FIN2	189.5	3.312	1.638	0.074	0.1507	0.0061	0.72275	983	28	904	34	1156	76	1156	76	21.7993	Core
VSS3_88.FIN2	202	0.869	0.816	0.015	0.0991	0.0012	0.44356	604.6	8.1	608.8	6.9	563	37	608.8	6.9	0.694674
VSS3_89.FIN2	75.4	1.183	1.962	0.037	0.1853	0.0025	0.36383	1101	13	1096	14	1099	38	1099	38	0.272975
VSS3_90.FIN2	249	8.7	0.513	0.01	0.06651	0.00084	0.45153	419.4	7.1	415	5.1	419	41	415	5.1	1.04912
VSS3_91.FIN2	577	1.213	0.357	0.018	0.049	0.0023	0.36312	309	13	308	14	320	110	308	14	0.323625	Rim
VSS3_91.FIN2	490	0.835	0.391	0.017	0.0513	0.0017	0.60177	334	12	322	10	354	82	322	10	3.59281	Core
VSS3_92.FIN2	236	0.99	0.36	0.016	0.0501	0.0014	0.39773	311	12	314.8	8.4	269	87	314.8	8.4	1.22186
VSS3_93.FIN2	944	3.74	0.556	0.01	0.04704	0.0009	0.63241	448.2	6.5	296.3	5.5	1327	33	DISC	DISC	33.8911
VSS3_94.FIN2	270.5	4	1.69	0.11	0.1305	0.0056	0.77497	997	42	790	32	1465	78	790	32	20.7623
VSS3_95.FIN2	110.7	2.043	5.55	0.14	0.3335	0.006	0.5946	1904	22	1853	29	1946	37	1946	37	4.77903
VSS3_96.FIN2	343	2.279	0.438	0.011	0.0593	0.0011	0.55029	367.9	7.7	371	6.9	315	48	371	6.9	0.84262
VSS3_97.FIN2	589	4.92	0.521	0.011	0.0658	0.0013	0.4859	425.2	7.5	410.4	7.9	474	47	410.4	7.9	3.48071
VSS3_98.FIN2	35.5	10.4	0.834	0.034	0.0999	0.0023	0.21407	615	18	613	14	583	82	613	14	0.325203
VSS3_99.FIN2	470	1.87	0.78	0.025	0.0955	0.0029	0.35749	585	14	588	17	552	78	588	17	0.512821
VSS3_100.FIN2	166.1	1.814	2.778	0.055	0.2308	0.0045	0.58333	1350	14	1338	23	1343	34	1343	34	0.372301
VSS3_101.FIN2	98.9	1.469	0.69	0.026	0.0807	0.0031	0.53987	533	16	499	19	652	75	499	19	6.37899
VSS3_102.FIN2	136	1.147	3.058	0.053	0.2439	0.0034	0.47228	1422	14	1406	18	1422	32	1422	32	1.12518
VSS3_103.FIN2	311	1.47	0.389	0.013	0.0514	0.0015	0.48859	332.6	9.3	322.7	9.4	374	69	322.7	9.4	2.97655
VSS3_104.FIN2	215	0.832	0.536	0.013	0.0699	0.0012	0.43535	434.6	8.2	436.6	7.6	392	48	436.6	7.6	0.460193
VSS3_105.FIN2	356	0.995	1.873	0.059	0.1741	0.0039	0.35787	1069	21	1034	21	1115	61	1115	61	7.26457
VSS3_106.FIN2	182	2.161	1.976	0.034	0.1862	0.0028	0.59897	1105	12	1100	15	1096	29	1096	29	0.364964
VSS3_107.FIN2	354	1.87	0.5385	0.0084	0.06979	0.00076	0.31934	436.9	5.5	434.8	4.6	420	35	434.8	4.6	0.480659
VSS3_108.FIN2	406	10.69	0.918	0.023	0.1081	0.0033	0.4451	660	12	661	19	623	68	661	19	0.151515
VSS3_109.FIN2	287	1.225	0.558	0.013	0.07094	0.00099	0.40846	449.5	8.6	441.8	5.9	453	48	441.8	5.9	1.71301
VSS3_110.FIN2	379	2.11	0.839	0.016	0.0982	0.0015	0.57011	617.3	8.7	603.6	8.8	646	37	603.6	8.8	2.21934
VSS3_111.FIN2	101	1.589	1.49	0.043	0.1443	0.0028	0.44546	924	17	869	16	1028	54	1028	54	15.4669
VSS3_112.FIN2	525	0.94	4.789	0.08	0.3061	0.005	0.85626	1780	14	1720	25	1840	16	1840	16	6.52174
VSS3_113.FIN2	167	4.31	3.018	0.067	0.1991	0.0033	0.41808	1409	17	1170	18	1774	39	1774	39	34.0474
VSS3_114.FIN2	103	1.359	4.063	0.084	0.283	0.0043	0.60541	1642	17	1605	21	1674	30	1674	30	4.12186
VSS3_115.FIN2	185.7	1.403	0.571	0.013	0.07074	0.0007	0.44646	457.7	8.3	441.1	4.1	508	45	441.1	4.1	3.62683
VSS3_116.FIN2	32.5	0.781	3.339	0.093	0.2542	0.005	0.69192	1486	22	1459	26	1505	42	1505	42	3.05648
VSS3_117.FIN2	374	5.9	2.105	0.042	0.1934	0.0026	0.73385	1149	14	1139	14	1157	26	1157	26	1.55575
VSS3_118.FIN2	131.7	2.295	1.516	0.046	0.1317	0.0027	0.54245	935	19	797	15	1260	52	797	15	14.7594
VSS3_119.FIN2	134.2	2.976	2.482	0.054	0.218	0.0051	0.62152	1264	16	1269	27	1270	39	1270	39	0.0787402
VSS3_120.FIN2	128.3	1.263	2.194	0.037	0.1975	0.0031	0.64891	1177	12	1161	17	1199	28	1199	28	3.16931
VSS3_121.FIN2	66.2	0.554	0.868	0.022	0.1037	0.0015	0.29998	632	12	635.7	8.7	593	55	635.7	8.7	0.585443
VSS3_122.FIN2	299	2.94	0.566	0.013	0.0655	0.0013	0.50249	454.2	8.3	408.9	7.7	664	48	408.9	7.7	9.97358
VSS3_123.FIN2	199.8	3.639	1.606	0.028	0.1577	0.0023	0.63717	971	11	943	13	1028	28	1028	28	8.26848
VSS3_124.FIN2	39.65	3.313	0.591	0.025	0.0749	0.0016	0.18893	469	16	465.4	9.3	483	86	465.4	9.3	0.767591
VSS3_125.FIN2	174	2.116	2.875	0.055	0.2365	0.0034	0.71746	1372	14	1368	18	1380	26	1380	26	0.869565
VSS3_126.FIN2	181.5	2.057	0.575	0.019	0.0746	0.0015	0.56633	459	12	463.8	8.9	425	59	463.8	8.9	1.04575	Rim
VSS3_126.FIN2	120.7	2.104	0.93	0.035	0.0982	0.0025	0.48556	667	18	604	14	878	70	604	14	9.44528	Core
VSS3_127.FIN2	137.6	1.148	1.879	0.036	0.1799	0.0026	0.54211	1071	13	1066	14	1081	32	1081	32	1.3876
VSS3_128.FIN2	542	0.9	0.503	0.017	0.04699	0.00086	0.28082	413	12	296	5.3	1111	72	296	5.3	28.3293
VSS3_129.FIN2	472	3.467	4.035	0.077	0.2557	0.0042	0.89093	1641	15	1467	21	1875	16	1875	16	21.76
VSS3_130.FIN2	392	2.289	5.546	0.043	0.3397	0.0026	0.61881	1907	6.7	1887	12	1931	12	1931	12	2.27861
VSS3_131.FIN2	83.9	2.039	0.496	0.013	0.0645	0.001	0.26403	407.5	9	402.9	6.2	427	59	402.9	6.2	1.12883
VSS3_132.FIN2	203.1	1.057	0.4384	0.0079	0.05812	0.00056	0.15593	368.5	5.5	364.2	3.4	399	43	364.2	3.4	1.16689
VSS3_133.FIN2	244	1.072	0.787	0.015	0.0953	0.0015	0.49452	589.2	8.8	586.7	8.6	583	40	586.7	8.6	0.424304
VSS3_134.FIN2	172	4.24	2.903	0.038	0.2391	0.0028	0.46424	1381	10	1381	15	1385	25	1385	25	0.288809
VSS3_135.FIN2	94.4	1.25	4.512	0.076	0.3136	0.0048	0.73142	1730	14	1757	24	1700	24	1700	24	3.35294
VSS3_136.FIN2	482	1.833	3.386	0.064	0.2403	0.0054	0.79581	1499	14	1386	28	1673	25	1673	25	17.1548
VSS3_137.FIN2	910	1.237	0.861	0.031	0.075	0.0024	0.68157	626	17	466	15	1258	55	466	15	25.5591
VSS3_138.FIN2	179.4	3.1	4.76	0.13	0.3162	0.0073	0.64113	1771	24	1768	36	1790	39	1790	39	1.22905
VSS3_139.FIN2	99.4	0.724	1.361	0.047	0.144	0.0031	0.4794	867	20	866	17	862	64	862	64	0.464037
VSS3_140.FIN2	395	2.44	3.42	0.11	0.2793	0.0095	0.75843	1503	25	1581	48	1404	48	1404	48	12.6068
GJ1_1.FIN2	389.1	46	0.808	0.011	0.0968	0.001	0.55393	600.6	6.1	595.6	6.2	605	26	595.6	6.2	0.832501
GJ1_2.FIN2	384.3	45.2	0.816	0.011	0.0978	0.0011	0.4157	604.8	6.1	601.5	6.2	602	29	601.5	6.2	0.545635
GJ1_3.FIN2	398	45	0.8	0.012	0.0967	0.0012	0.55107	595.7	6.7	595.6	7.1	574	28	595.6	7.1	0.016787
GJ1_4.FIN2	380.2	48	0.809	0.014	0.0971	0.0015	0.6252	601.6	8.2	597.1	9.1	602	31	597.1	9.1	0.748005
GJ1_5.FIN2	370.4	45.7	0.836	0.014	0.0981	0.0014	0.4722	615.6	7.8	602.9	8.1	641	34	602.9	8.1	2.06303
GJ1_6.FIN2	375.3	46.5	0.81	0.012	0.0992	0.0012	0.53542	601.8	6.8	609.4	6.9	559	29	609.4	6.9	1.26288
GJ1_65.FIN2	385	45.2	0.827	0.013	0.0987	0.0011	0.51815	611.8	7.1	606.5	6.7	619	30	606.5	6.7	0.866296
GJ1_66.FIN2	382.6	45.6	0.825	0.011	0.0982	0.0012	0.41127	610.4	6	603.6	7	625	30	603.6	7	1.11402
GJ1_7.FIN2	399	45.1	0.8	0.01	0.0971	0.0012	0.47239	596.7	5.7	597	7	586	29	597	7	0.0502765
GJ1_8.FIN2	391	45.8	0.805	0.011	0.0965	0.0011	0.44328	599.1	6.1	593.9	6.6	616	29	593.9	6.6	0.867969
GJ1_9.FIN2	370	46	0.813	0.014	0.0971	0.0013	0.62332	602.7	8	597.2	7.7	624	30	597.2	7.7	0.91256
GJ1_10.FIN2	385	45.7	0.808	0.011	0.098	0.0012	0.48129	600.3	6.4	602.5	6.8	601	29	602.5	6.8	0.366483
GJ1_11.FIN2	391	45.5	0.817	0.011	0.098	0.0011	0.46265	605.3	6.3	602.6	6.6	617	28	602.6	6.6	0.44606
GJ1_12.FIN2	390	46.3	0.8	0.012	0.097	0.0012	0.36089	595.7	6.6	597.4	6.7	601	33	597.4	6.7	0.285379
GJ1_13.FIN2	387	45.5	0.81	0.011	0.0977	0.0011	0.40975	602	6	600.9	6.5	609	30	600.9	6.5	0.182724
GJ1_14.FIN2	386	45.5	0.804	0.011	0.09754	0.00097	0.44528	599.1	5.8	599.9	5.7	603	27	599.9	5.7	0.133534
GJ1_15.FIN2	369.2	45.67	0.815	0.012	0.0987	0.0012	0.51521	604.2	6.6	606.8	6.9	592	29	606.8	6.9	0.430321
GJ1_16.FIN2	396	45.8	0.795	0.011	0.09732	0.00093	0.45591	593.3	6.3	598.6	5.5	577	28	598.6	5.5	0.893309
GJ1_17.FIN2	382.5	45.6	0.81	0.011	0.09702	0.00093	0.32607	602.3	5.9	596.8	5.5	616	30	596.8	5.5	0.913166
GJ1_18.FIN2	385.4	45.9	0.798	0.01	0.0979	0.0011	0.45565	595.9	5.9	602	6.4	567	28	602	6.4	1.02366
GJ1_19.FIN2	382.7	45.4	0.812	0.011	0.098	0.00087	0.37795	603	6.4	602.6	5.1	601	30	602.6	5.1	0.066335
GJ1_20.FIN2	382.7	45.7	0.811	0.01	0.09767	0.00095	0.36467	603.3	5.9	600.6	5.6	613	28	600.6	5.6	0.447539
GJ1_21.FIN2	385.8	46.37	0.801	0.011	0.09698	0.00098	0.49321	596.9	6	596.6	5.7	588	27	596.6	5.7	0.0502597
GJ1_22.FIN2	388.3	45.5	0.81	0.01	0.09766	0.00087	0.29287	601.7	5.7	600.6	5.1	602	28	600.6	5.1	0.182815
GJ1_23.FIN2	373.9	45.6	0.805	0.011	0.098	0.0011	0.5202	599.1	6.2	602.4	6.4	585	26	602.4	6.4	0.550826
GJ1_24.FIN2	383.3	45.14	0.8106	0.0094	0.0981	0.001	0.29778	602.9	5.4	603	6.1	600	29	603	6.1	0.0165865
GJ1_25.FIN2	393	45.99	0.8022	0.0095	0.0974	0.001	0.50348	597.5	5.4	598.9	6.1	606	24	598.9	6.1	0.23431
GJ1_26.FIN2	388	46	0.807	0.011	0.0968	0.0011	0.31616	600.2	6.1	595.7	6.4	628	31	595.7	6.4	0.74975
GJ1_27.FIN2	386.3	45.83	0.809	0.011	0.0975	0.001	0.46549	601.4	6	599.7	6	611	27	599.7	6	0.282674
GJ1_28.FIN2	379.2	45.3	0.812	0.01	0.0982	0.001	0.53149	602.7	5.8	603.9	6	600	25	603.9	6	0.199104
GJ1_29.FIN2	392.2	46.1	0.807	0.012	0.098	0.0012	0.45956	600.2	6.5	602.6	6.9	591	30	602.6	6.9	0.399867
GJ1_30.FIN2	368	45.7	0.803	0.012	0.0973	0.001	0.51532	598.6	6.5	598.4	5.9	595	27	598.4	5.9	0.0334113
GJ1_31.FIN2	384	45.9	0.801	0.01	0.0973	0.00095	0.40994	597.6	5.9	598.4	5.6	591	27	598.4	5.6	0.133869
GJ1_32.FIN2	388	45	0.816	0.01	0.0973	0.001	0.48164	605.6	6	598.6	6.1	623	26	598.6	6.1	1.15588
GJ1_33.FIN2	388	46	0.815	0.011	0.0983	0.0013	0.55047	604.5	6.2	604.5	7.7	594	27	604.5	7.7	0
GJ1_34.FIN2	394.4	46.32	0.802	0.011	0.0972	0.0011	0.40777	597.3	6.4	597.6	6.4	582	31	597.6	6.4	0.050226
GJ1_35.FIN2	369	45.1	0.825	0.01	0.09837	0.00092	0.48649	610.6	5.7	604.8	5.4	620	26	604.8	5.4	0.949885
GJ1_36.FIN2	379	46.07	0.8153	0.0097	0.0978	0.001	0.34978	604.9	5.4	601.6	5.9	605	26	601.6	5.9	0.545545
GJ1_37.FIN2	387.3	46.1	0.808	0.0095	0.09697	0.00091	0.43772	600.8	5.3	596.5	5.4	604	25	596.5	5.4	0.715712
GJ1_38.FIN2	393	45.46	0.8054	0.0088	0.0976	0.001	0.31059	599.4	4.9	600.5	5.9	590	27	600.5	5.9	0.183517
GJ1_39.FIN2	368.8	44.85	0.812	0.011	0.09816	0.00097	0.47508	603.6	5.8	603.5	5.7	594	26	603.5	5.7	0.0165673
GJ1_40.FIN2	390.6	46.8	0.792	0.01	0.0965	0.0011	0.39032	591.4	5.6	594	6.3	579	29	594	6.3	0.439635
GJ1_41.FIN2	384	45.57	0.8165	0.0093	0.09805	0.00091	0.41461	606.3	5.1	602.9	5.3	617	25	602.9	5.3	0.560778
GJ1_42.FIN2	401	45.78	0.815	0.011	0.09734	0.00093	0.43618	604.7	6.1	598.7	5.5	624	27	598.7	5.5	0.992228
GJ1_43.FIN2	380	45.51	0.7936	0.0091	0.09784	0.00086	0.3488	592.7	5.2	601.7	5	557	26	601.7	5	1.51847
GJ1_44.FIN2	371.8	45.8	0.806	0.01	0.09773	0.00099	0.46344	599.4	5.7	601	5.8	600	26	601	5.8	0.266934
GJ1_45.FIN2	389	45.37	0.812	0.0092	0.09749	0.00092	0.396	603	5.2	599.6	5.4	620	24	599.6	5.4	0.563847
GJ1_46.FIN2	388.2	45.9	0.8108	0.0089	0.09761	0.00097	0.34225	602.4	5	600.3	5.7	619	26	600.3	5.7	0.348606
GJ1_48.FIN2	382	45.9	0.8131	0.0097	0.0979	0.0011	0.47188	603.6	5.4	601.7	6.2	621	25	601.7	6.2	0.314778
GJ1_49.FIN2	392	45.7	0.804	0.01	0.0971	0.001	0.36453	598.6	5.7	597.3	6	607	28	597.3	6	0.217173
GJ1_50.FIN2	387	46.1	0.81	0.013	0.0973	0.0011	0.47225	601.3	7	598.4	6.6	612	32	598.4	6.6	0.482288
GJ1_51.FIN2	373	45.8	0.822	0.011	0.0987	0.0012	0.45309	609.4	6.1	606.7	6.8	611	29	606.7	6.8	0.443059
GJ1_52.FIN2	390	45.35	0.8163	0.0099	0.09646	0.00099	0.53032	605.4	5.5	593.5	5.8	645	25	593.5	5.8	1.96564
GJ1_53.FIN2	384	45.7	0.82	0.012	0.0984	0.0014	0.50663	607.5	6.4	604.7	8.2	595	31	604.7	8.2	0.460905
GJ1_54.FIN2	374	45.1	0.817	0.011	0.0982	0.0011	0.46577	605.7	6.3	603.8	6.2	590	28	603.8	6.2	0.313687
GJ1_55.FIN2	387	46.6	0.812	0.011	0.0971	0.0013	0.38567	602.9	6.4	597.1	7.8	602	34	597.1	7.8	0.962017
GJ1_56.FIN2	386	46	0.817	0.011	0.0988	0.0012	0.38979	605.5	6.2	607.4	7	570	31	607.4	7	0.31379
GJ1_57.FIN2	381	46	0.8232	0.0096	0.0976	0.0011	0.37388	609.3	5.4	600.3	6.2	622	27	600.3	6.2	1.4771
GJ1_58.FIN2	382.8	45.09	0.8016	0.0092	0.09698	0.00091	0.46338	597.2	5.2	596.6	5.4	585	24	596.6	5.4	0.100469
GJ1_59.FIN2	380.1	45.88	0.807	0.01	0.09752	0.00093	0.40066	600.3	5.7	599.8	5.5	603	26	599.8	5.5	0.0832917
GJ1_60.FIN2	389.7	45.63	0.809	0.0094	0.098	0.001	0.37424	601.3	5.3	602.8	6	590	27	602.8	6	0.24946
GJ1_61.FIN2	400	45.8	0.8042	0.0099	0.09723	0.00085	0.43937	598.6	5.5	598.1	5	602	25	598.1	5	0.0835282
GJ1_62.FIN2	375.1	46	0.824	0.01	0.09759	0.00092	0.47888	609.7	5.8	600.2	5.4	648	24	600.2	5.4	1.55814
GJ1_63.FIN2	384.4	45.8	0.794	0.01	0.0976	0.001	0.56857	593.1	5.7	600.2	5.9	576	25	600.2	5.9	1.1971
GJ1_64.FIN2	384.1	45.5	0.7957	0.0097	0.09785	0.00089	0.42382	593.8	5.5	601.7	5.2	573	26	601.7	5.2	1.33041
0	0	0	0	0	0	0	0	0	0	0	0	0	0	#DIV/0!	#DIV/0!	#DIV/0!	Rim
0	0	0	0	0	0	0	0	0	0	0	0	0	0	#DIV/0!	#DIV/0!	#DIV/0!	Core
0	0	0	0	0	0	0	0	0	0	0	0	0	0	#DIV/0!	#DIV/0!	#DIV/0!	Core
0	0	0	0	0	0	0	0	0	0	0	0	0	0	#DIV/0!	#DIV/0!	#DIV/0!	Core
0	0	0	0	0	0	0	0	0	0	0	0	0	0	#DIV/0!	#DIV/0!	#DIV/0!	Core
0	0	0	0	0	0	0	0	0	0	0	0	0	0	#DIV/0!	#DIV/0!	#DIV/0!	Core
0	0	0	0	0	0	0	0	0	0	0	0	0	0	#DIV/0!	#DIV/0!	#DIV/0!	Core
0	0	0	0	0	0	0	0	0	0	0	0	0	0	#DIV/0!	#DIV/0!	#DIV/0!	Core
0	0	0	0	0	0	0	0	0	0	0	0	0	0	#DIV/0!	#DIV/0!	#DIV/0!	Core
0	0	0	0	0	0	0	0	0	0	0	0	0	0	#DIV/0!	#DIV/0!	#DIV/0!	Core
0	0	0	0	0	0	0	0	0	0	0	0	0	0	#DIV/0!	#DIV/0!	#DIV/0!	Core
0	0	0	0	0	0	0	0	0	0	0	0	0	0	#DIV/0!	#DIV/0!	#DIV/0!	Core
0	0	0	0	0	0	0	0	0	0	0	0	0	0	#DIV/0!	#DIV/0!	#DIV/0!	Core
0	0	0	0	0	0	0	0	0	0	0	0	0	0	#DIV/0!	#DIV/0!	#DIV/0!	Core
0	0	0	0	0	0	0	0	0	0	0	0	0	0	#DIV/0!	#DIV/0!	#DIV/0!	Core
0	0	0	0	0	0	0	0	0	0	0	0	0	0	#DIV/0!	#DIV/0!	#DIV/0!	Core
0	0	0	0	0	0	0	0	0	0	0	0	0	0	#DIV/0!	#DIV/0!	#DIV/0!	Core
0	0	0	0	0	0	0	0	0	0	0	0	0	0	#DIV/0!	#DIV/0!	#DIV/0!	Core
0	0	0	0	0	0	0	0	0	0	0	0	0	0	#DIV/0!	#DIV/0!	#DIV/0!	Core
0	0	0	0	0	0	0	0	0	0	0	0	0	0	#DIV/0!	#DIV/0!	#DIV/0!	Core
0	0	0	0	0	0	0	0	0	0	0	0	0	0	#DIV/0!	#DIV/0!	#DIV/0!	Core
0	0	0	0	0	0	0	0	0	0	0	0	0	0	#DIV/0!	#DIV/0!	#DIV/0!	Core
0	0	0	0	0	0	0	0	0	0	0	0	0	0	#DIV/0!	#DIV/0!	#DIV/0!	Core
0	0	0	0	0	0	0	0	0	0	0	0	0	0	#DIV/0!	#DIV/0!	#DIV/0!	Core
0	0	0	0	0	0	0	0	0	0	0	0	0	0	#DIV/0!	#DIV/0!	#DIV/0!	Core
0	0	0	0	0	0	0	0	0	0	0	0	0	0	#DIV/0!	#DIV/0!	#DIV/0!	Core
0	0	0	0	0	0	0	0	0	0	0	0	0	0	#DIV/0!	#DIV/0!	#DIV/0!	Core
0	0	0	0	0	0	0	0	0	0	0	0	0	0	#DIV/0!	#DIV/0!	#DIV/0!	Core
0	0	0	0	0	0	0	0	0	0	0	0	0	0	#DIV/0!	#DIV/0!	#DIV/0!	Core
0	0	0	0	0	0	0	0	0	0	0	0	0	0	#DIV/0!	#DIV/0!	#DIV/0!	Core
0	0	0	0	0	0	0	0	0	0	0	0	0	0	#DIV/0!	#DIV/0!	#DIV/0!	Core
0	0	0	0	0	0	0	0	0	0	0	0	0	0	#DIV/0!	#DIV/0!	#DIV/0!	Core
0	0	0	0	0	0	0	0	0	0	0	0	0	0	#DIV/0!	#DIV/0!	#DIV/0!	Core
0	0	0	0	0	0	0	0	0	0	0	0	0	0	#DIV/0!	#DIV/0!	#DIV/0!	Core
0	0	0	0	0	0	0	0	0	0	0	0	0	0	#DIV/0!	#DIV/0!	#DIV/0!	Core
0	0	0	0	0	0	0	0	0	0	0	0	0	0	#DIV/0!	#DIV/0!	#DIV/0!	Core
0	0	0	0	0	0	0	0	0	0	0	0	0	0	#DIV/0!	#DIV/0!	#DIV/0!	Core
0	0	0	0	0	0	0	0	0	0	0	0	0	0	#DIV/0!	#DIV/0!	#DIV/0!	Core
0	0	0	0	0	0	0	0	0	0	0	0	0	0	#DIV/0!	#DIV/0!	#DIV/0!	Core
0	0	0	0	0	0	0	0	0	0	0	0	0	0	#DIV/0!	#DIV/0!	#DIV/0!	Core
0	0	0	0	0	0	0	0	0	0	0	0	0	0	#DIV/0!	#DIV/0!	#DIV/0!	Core
0	0	0	0	0	0	0	0	0	0	0	0	0	0	#DIV/0!	#DIV/0!	#DIV/0!	Core
0	0	0	0	0	0	0	0	0	0	0	0	0	0	#DIV/0!	#DIV/0!	#DIV/0!	Core
0	0	0	0	0	0	0	0	0	0	0	0	0	0	#DIV/0!	#DIV/0!	#DIV/0!	Core
0	0	0	0	0	0	0	0	0	0	0	0	0	0	#DIV/0!	#DIV/0!	#DIV/0!	Core
0	0	0	0	0	0	0	0	0	0	0	0	0	0	#DIV/0!	#DIV/0!	#DIV/0!	Core
0	0	0	0	0	0	0	0	0	0	0	0	0	0	#DIV/0!	#DIV/0!	#DIV/0!	Core
0	0	0	0	0	0	0	0	0	0	0	0	0	0	#DIV/0!	#DIV/0!	#DIV/0!	Core
0	0	0	0	0	0	0	0	0	0	0	0	0	0	#DIV/0!	#DIV/0!	#DIV/0!	Core
0	0	0	0	0	0	0	0	0	0	0	0	0	0	#DIV/0!	#DIV/0!	#DIV/0!	Core
0	0	0	0	0	0	0	0	0	0	0	0	0	0	#DIV/0!	#DIV/0!	#DIV/0!	Core
0	0	0	0	0	0	0	0	0	0	0	0	0	0	#DIV/0!	#DIV/0!	#DIV/0!	Core
0	0	0	0	0	0	0	0	0	0	0	0	0	0	#DIV/0!	#DIV/0!	#DIV/0!	Core
0	0	0	0	0	0	0	0	0	0	0	0	0	0	#DIV/0!	#DIV/0!	#DIV/0!	Core
0	0	0	0	0	0	0	0	0	0	0	0	0	0	#DIV/0!	#DIV/0!	#DIV/0!	Core
0	0	0	0	0	0	0	0	0	0	0	0	0	0	#DIV/0!	#DIV/0!	#DIV/0!	Core
0	0	0	0	0	0	0	0	0	0	0	0	0	0	#DIV/0!	#DIV/0!	#DIV/0!	Core
0	0	0	0	0	0	0	0	0	0	0	0	0	0	#DIV/0!	#DIV/0!	#DIV/0!	Core
0	0	0	0	0	0	0	0	0	0	0	0	0	0	#DIV/0!	#DIV/0!	#DIV/0!	Core
0	0	0	0	0	0	0	0	0	0	0	0	0	0	#DIV/0!	#DIV/0!	#DIV/0!	Core
0	0	0	0	0	0	0	0	0	0	0	0	0	0	#DIV/0!	#DIV/0!	#DIV/0!	Core
0	0	0	0	0	0	0	0	0	0	0	0	0	0	#DIV/0!	#DIV/0!	#DIV/0!	Core
0	0	0	0	0	0	0	0	0	0	0	0	0	0	#DIV/0!	#DIV/0!	#DIV/0!	Core
0	0	0	0	0	0	0	0	0	0	0	0	0	0	#DIV/0!	#DIV/0!	#DIV/0!	Core
0	0	0	0	0	0	0	0	0	0	0	0	0	0	#DIV/0!	#DIV/0!	#DIV/0!	Core
0	0	0	0	0	0	0	0	0	0	0	0	0	0	#DIV/0!	#DIV/0!	#DIV/0!	Core
0	0	0	0	0	0	0	0	0	0	0	0	0	0
0	0	0	0	0	0	0	0	0	0	0	0	0	0	#DIV/0!	#DIV/0!	#DIV/0!	Core
0	0	0	0	0	0	0	0	0	0	0	0	0	0	#DIV/0!	#DIV/0!	#DIV/0!	Core
0	0	0	0	0	0	0	0	0	0	0	0	0	0	#DIV/0!	#DIV/0!	#DIV/0!	Core
0	0	0	0	0	0	0	0	0	0	0	0	0	0	#DIV/0!	#DIV/0!	#DIV/0!	Core
0	0	0	0	0	0	0	0	0	0	0	0	0	0	#DIV/0!	#DIV/0!	#DIV/0!	Core
0	0	0	0	0	0	0	0	0	0	0	0	0	0	#DIV/0!	#DIV/0!	#DIV/0!	Core
0	0	0	0	0	0	0	0	0	0	0	0	0	0	#DIV/0!	#DIV/0!	#DIV/0!	Core
0	0	0	0	0	0	0	0	0	0	0	0	0	0	#DIV/0!	#DIV/0!	#DIV/0!	Core
0	0	0	0	0	0	0	0	0	0	0	0	0	0	#DIV/0!	#DIV/0!	#DIV/0!	Core
0	0	0	0	0	0	0	0	0	0	0	0	0	0	#DIV/0!	#DIV/0!	#DIV/0!	Core
0	0	0	0	0	0	0	0	0	0	0	0	0	0	#DIV/0!	#DIV/0!	#DIV/0!	Core
0	0	0	0	0	0	0	0	0	0	0	0	0	0	#DIV/0!	#DIV/0!	#DIV/0!	Core
0	0	0	0	0	0	0	0	0	0	0	0	0	0	#DIV/0!	#DIV/0!	#DIV/0!	Core
0	0	0	0	0	0	0	0	0	0	0	0	0	0	#DIV/0!	#DIV/0!	#DIV/0!	Core
0	0	0	0	0	0	0	0	0	0	0	0	0	0	#DIV/0!	#DIV/0!	#DIV/0!	Core
0	0	0	0	0	0	0	0	0	0	0	0	0	0	#DIV/0!	#DIV/0!	#DIV/0!	Core
0	0	0	0	0	0	0	0	0	0	0	0	0	0	#DIV/0!	#DIV/0!	#DIV/0!	Core
0	0	0	0	0	0	0	0	0	0	0	0	0	0	#DIV/0!	#DIV/0!	#DIV/0!	Core
0	0	0	0	0	0	0	0	0	0	0	0	0	0	#DIV/0!	#DIV/0!	#DIV/0!	Core
0	0	0	0	0	0	0	0	0	0	0	0	0	0	#DIV/0!	#DIV/0!	#DIV/0!	Core
0	0	0	0	0	0	0	0	0	0	0	0	0	0	#DIV/0!	#DIV/0!	#DIV/0!	Core
0	0	0	0	0	0	0	0	0	0	0	0	0	0	#DIV/0!	#DIV/0!	#DIV/0!	Core
0	0	0	0	0	0	0	0	0	0	0	0	0	0	#DIV/0!	#DIV/0!	#DIV/0!	Core
0	0	0	0	0	0	0	0	0	0	0	0	0	0	#DIV/0!	#DIV/0!	#DIV/0!	Core
0	0	0	0	0	0	0	0	0	0	0	0	0	0	#DIV/0!	#DIV/0!	#DIV/0!	Core
0	0	0	0	0	0	0	0	0	0	0	0	0	0	#DIV/0!	#DIV/0!	#DIV/0!	Core
0	0	0	0	0	0	0	0	0	0	0	0	0	0	#DIV/0!	#DIV/0!	#DIV/0!	Core
0	0	0	0	0	0	0	0	0	0	0	0	0	0	#DIV/0!	#DIV/0!	#DIV/0!	Core
0	0	0	0	0	0	0	0	0	0	0	0	0	0	#DIV/0!	#DIV/0!	#DIV/0!	Core
0	0	0	0	0	0	0	0	0	0	0	0	0	0	#DIV/0!	#DIV/0!	#DIV/0!	Core
0	0	0	0	0	0	0	0	0	0	0	0	0	0	#DIV/0!	#DIV/0!	#DIV/0!	Core
0	0	0	0	0	0	0	0	0	0	0	0	0	0	#DIV/0!	#DIV/0!	#DIV/0!	Core
0	0	0	0	0	0	0	0	0	0	0	0	0	0	#DIV/0!	#DIV/0!	#DIV/0!	Core
0	0	0	0	0	0	0	0	0	0	0	0	0	0	#DIV/0!	#DIV/0!	#DIV/0!	Core
0	0	0	0	0	0	0	0	0	0	0	0	0	0	#DIV/0!	#DIV/0!	#DIV/0!	Core
0	0	0	0	0	0	0	0	0	0	0	0	0	0	#DIV/0!	#DIV/0!	#DIV/0!	Core
0	0	0	0	0	0	0	0	0	0	0	0	0	0	#DIV/0!	#DIV/0!	#DIV/0!	Core
0	0	0	0	0	0	0	0	0	0	0	0	0	0	#DIV/0!	#DIV/0!	#DIV/0!	Core
0	0	0	0	0	0	0	0	0	0	0	0	0	0	#DIV/0!	#DIV/0!	#DIV/0!	Core
0	0	0	0	0	0	0	0	0	0	0	0	0	0	#DIV/0!	#DIV/0!	#DIV/0!	Core
0	0	0	0	0	0	0	0	0	0	0	0	0	0	#DIV/0!	#DIV/0!	#DIV/0!	Core
0	0	0	0	0	0	0	0	0	0	0	0	0	0	#DIV/0!	#DIV/0!	#DIV/0!	Core
0	0	0	0	0	0	0	0	0	0	0	0	0	0	#DIV/0!	#DIV/0!	#DIV/0!	Core
0	0	0	0	0	0	0	0	0	0	0	0	0	0	#DIV/0!	#DIV/0!	#DIV/0!	Core
0	0	0	0	0	0	0	0	0	0	0	0	0	0	#DIV/0!	#DIV/0!	#DIV/0!	Core
0	0	0	0	0	0	0	0	0	0	0	0	0	0	#DIV/0!	#DIV/0!	#DIV/0!	Core
0	0	0	0	0	0	0	0	0	0	0	0	0	0	#DIV/0!	#DIV/0!	#DIV/0!	Core
0	0	0	0	0	0	0	0	0	0	0	0	0	0	#DIV/0!	#DIV/0!	#DIV/0!	Core
0	0	0	0	0	0	0	0	0	0	0	0	0	0	#DIV/0!	#DIV/0!	#DIV/0!	Core
0	0	0	0	0	0	0	0	0	0	0	0	0	0	#DIV/0!	#DIV/0!	#DIV/0!	Core
0	0	0	0	0	0	0	0	0	0	0	0	0	0	#DIV/0!	#DIV/0!	#DIV/0!	Core
0	0	0	0	0	0	0	0	0	0	0	0	0	0	#DIV/0!	#DIV/0!	#DIV/0!	Core
0	0	0	0	0	0	0	0	0	0	0	0	0	0	#DIV/0!	#DIV/0!	#DIV/0!	Core
0	0	0	0	0	0	0	0	0	0	0	0	0	0	#DIV/0!	#DIV/0!	#DIV/0!	Core
0	0	0	0	0	0	0	0	0	0	0	0	0	0	#DIV/0!	#DIV/0!	#DIV/0!	Core
0	0	0	0	0	0	0	0	0	0	0	0	0	0	#DIV/0!	#DIV/0!	#DIV/0!	Core
0	0	0	0	0	0	0	0	0	0	0	0	0	0	#DIV/0!	#DIV/0!	#DIV/0!	Core
0	0	0	0	0	0	0	0	0	0	0	0	0	0	#DIV/0!	#DIV/0!	#DIV/0!	Core
0	0	0	0	0	0	0	0	0	0	0	0	0	0	#DIV/0!	#DIV/0!	#DIV/0!	Core
0	0	0	0	0	0	0	0	0	0	0	0	0	0	#DIV/0!	#DIV/0!	#DIV/0!	Core
0	0	0	0	0	0	0	0	0	0	0	0	0	0	#DIV/0!	#DIV/0!	#DIV/0!	Core
0	0	0	0	0	0	0	0	0	0	0	0	0	0	#DIV/0!	#DIV/0!	#DIV/0!
0	0	0	0	0	0	0	0	0	0	0	0	0	0	#DIV/0!	#DIV/0!	#DIV/0!
0	0	0	0	0	0	0	0	0	0	0	0	0	0	#DIV/0!	#DIV/0!	#DIV/0!
0	0	0	0	0	0	0	0	0	0	0	0	0	0	#DIV/0!	#DIV/0!	#DIV/0!
0	0	0	0	0	0	0	0	0	0	0	0	0	0	#DIV/0!	#DIV/0!	#DIV/0!
0	0	0	0	0	0	0	0	0	0	0	0	0	0	#DIV/0!	#DIV/0!	#DIV/0!
0														#DIV/0!	#DIV/0!	#DIV/0!
0														#DIV/0!	#DIV/0!	#DIV/0!
0														#DIV/0!	#DIV/0!	#DIV/0!
0														#DIV/0!	#DIV/0!	#DIV/0!
0														#DIV/0!	#DIV/0!	#DIV/0!
0														#DIV/0!	#DIV/0!	#DIV/0!
0														#DIV/0!	#DIV/0!	#DIV/0!
0														#DIV/0!	#DIV/0!	#DIV/0!
0														#DIV/0!	#DIV/0!	#DIV/0!
0														#DIV/0!	#DIV/0!	#DIV/0!
0														#DIV/0!	#DIV/0!	#DIV/0!
0														#DIV/0!	#DIV/0!	#DIV/0!
0														#DIV/0!	#DIV/0!	#DIV/0!
0														#DIV/0!	#DIV/0!	#DIV/0!
0														#DIV/0!	#DIV/0!	#DIV/0!
0														#DIV/0!	#DIV/0!	#DIV/0!
0														#DIV/0!	#DIV/0!	#DIV/0!
0														#DIV/0!	#DIV/0!	#DIV/0!
0														#DIV/0!	#DIV/0!	#DIV/0!
0														#DIV/0!	#DIV/0!	#DIV/0!
0														#DIV/0!	#DIV/0!	#DIV/0!
0														#DIV/0!	#DIV/0!	#DIV/0!
0														#DIV/0!	#DIV/0!	#DIV/0!
0														#DIV/0!	#DIV/0!	#DIV/0!
0														#DIV/0!	#DIV/0!	#DIV/0!
0														#DIV/0!	#DIV/0!	#DIV/0!
0														#DIV/0!	#DIV/0!	#DIV/0!
0														#DIV/0!	#DIV/0!	#DIV/0!
0														#DIV/0!	#DIV/0!	#DIV/0!
0														#DIV/0!	#DIV/0!	#DIV/0!
0														#DIV/0!	#DIV/0!	#DIV/0!
0														#DIV/0!	#DIV/0!	#DIV/0!
0														#DIV/0!	#DIV/0!	#DIV/0!
0														#DIV/0!	#DIV/0!	#DIV/0!
0														#DIV/0!	#DIV/0!	#DIV/0!
0														#DIV/0!	#DIV/0!	#DIV/0!
0														#DIV/0!	#DIV/0!	#DIV/0!
0														#DIV/0!	#DIV/0!	#DIV/0!
0														#DIV/0!	#DIV/0!	#DIV/0!
														#DIV/0!	#DIV/0!	#DIV/0!
														#DIV/0!	#DIV/0!	#DIV/0!
														#DIV/0!	#DIV/0!	#DIV/0!
														#DIV/0!	#DIV/0!	#DIV/0!
														#DIV/0!	#DIV/0!	#DIV/0!
														#DIV/0!	#DIV/0!	#DIV/0!
														#DIV/0!	#DIV/0!	#DIV/0!
														#DIV/0!	#DIV/0!	#DIV/0!
														#DIV/0!	#DIV/0!	#DIV/0!
														#DIV/0!	#DIV/0!	#DIV/0!
														#DIV/0!	#DIV/0!	#DIV/0!
														#DIV/0!	#DIV/0!	#DIV/0!
														#DIV/0!	#DIV/0!	#DIV/0!
														#DIV/0!	#DIV/0!	#DIV/0!
														#DIV/0!	#DIV/0!	#DIV/0!
														#DIV/0!	#DIV/0!	#DIV/0!
														#DIV/0!	#DIV/0!	#DIV/0!
														#DIV/0!	#DIV/0!	#DIV/0!
														#DIV/0!	#DIV/0!	#DIV/0!
														#DIV/0!	#DIV/0!	#DIV/0!
														#DIV/0!	#DIV/0!	#DIV/0!
														#DIV/0!	#DIV/0!	#DIV/0!
														#DIV/0!	#DIV/0!	#DIV/0!
														#DIV/0!	#DIV/0!	#DIV/0!
														#DIV/0!	#DIV/0!	#DIV/0!

## Sheet: Table S7 VSS1 and VSS2
Table S7
Sample Name:								207/235		206/238		207/206		Best age
Grain #	[U] ppm	U/Th	207/235	2σ error	206/238	2σ error	RHO	Age Ma	2σ error	Age (Ma)	2σ error	Age (Ma)	2σ error	(Ma)	2σ error	% Discordance*	Rim/Core
GJ1_1.FIN2	389	45.7	0.796	0.011	0.0979	0.0012	0.40915	594.2	6.3	602.1	7.1	567	31	602.1	7.1	1.32952
GJ1_2.FIN2	382.2	45.5	0.819	0.011	0.0967	0.001	0.36419	606.6	6.3	594.7	6.1	643	31	594.7	6.1	1.96175
GJ1_3.FIN2	379.3	45.2	0.826	0.012	0.0981	0.0012	0.30119	610.6	6.7	602.9	7	628	34	602.9	7	1.26105
GJ1_4.FIN2	381.5	45.2	0.807	0.012	0.0976	0.0012	0.55978	601.1	6.8	600.4	6.9	580	28	600.4	6.9	0.116453
GJ1_5.FIN2	357.3	45.5	0.803	0.018	0.1027	0.0029	0.5475	597	10	629	17	447	52	629	17	5.36013
GJ1_6.FIN2	348	43.7	0.822	0.016	0.1016	0.0023	0.4704	607.7	9	623	14	512	47	623	14	2.51769
GJ1_7.FIN2	369	46.5	0.79	0.018	0.0995	0.0027	0.45937	589	10	613	16	462	56	613	16	4.0747
GJ1_8.FIN2	388	48	0.775	0.022	0.1001	0.0037	0.60334	580	12	613	22	441	63	613	22	5.68966
GJ1_9.FIN2	383.2	44.6	0.817	0.011	0.0973	0.0011	0.27575	606	6.1	598.5	6.7	628	31	598.5	6.7	1.23762
GJ1_10.FIN2	384.8	45.4	0.817	0.014	0.0974	0.0014	0.5762	605.6	7.6	599.1	8.1	635	30	599.1	8.1	1.07332
GJ1_11.FIN2	383.7	46.2	0.8	0.012	0.0975	0.0013	0.48654	597	6.7	599.7	7.6	601	31	599.7	7.6	0.452261
GJ1_12.FIN2	384	46.2	0.81	0.013	0.0977	0.0013	0.58118	601.3	7.4	600.6	7.6	617	31	600.6	7.6	0.116414
GJ1_13.FIN2	383.7	46.1	0.816	0.014	0.0974	0.0012	0.44741	604.5	7.9	599.3	7.2	635	36	599.3	7.2	0.860215
GJ1_14.FIN2	384.3	45.16	0.811	0.012	0.0978	0.0011	0.50099	603.1	6.9	601.3	6.3	612	29	601.3	6.3	0.298458
GJ1_15.FIN2	383.4	45.3	0.809	0.01	0.098	0.001	0.45311	601.1	5.9	602.3	6	591	27	602.3	6	0.199634
GJ1_16.FIN2	385.1	46.07	0.806	0.012	0.09716	0.00087	0.5196	599.3	6.6	597.7	5.1	613	27	597.7	5.1	0.266978
GJ1_17.FIN2	382.9	45.1	0.815	0.011	0.0979	0.001	0.43381	604.5	5.9	602.1	6	615	26	602.1	6	0.397022
GJ1_18.FIN2	385	46.4	0.802	0.011	0.09734	0.00099	0.51859	597.4	6	598.7	5.8	581	27	598.7	5.8	0.21761
GJ1_19.FIN2	383.2	45.9	0.808	0.011	0.0982	0.0011	0.49687	601.6	6	603.5	6.5	569	27	603.5	6.5	0.315824
GJ1_20.FIN2	384.2	45.43	0.8142	0.0097	0.09749	0.00097	0.38055	605	5.6	599.6	5.7	619	26	599.6	5.7	0.892562
GJ1_21.FIN2	384.1	46.08	0.802	0.01	0.09713	0.00093	0.31315	597.5	5.7	597.5	5.5	605	28	597.5	5.5	0
GJ1_22.FIN2	384	45.3	0.823	0.01	0.09836	0.00096	0.41334	609.1	5.8	604.7	5.6	622	27	604.7	5.6	0.722377
GJ1_23.FIN2	383.7	45.63	0.8	0.01	0.09719	0.00089	0.40827	596	5.7	597.8	5.2	592	27	597.8	5.2	0.302013
GJ1_24.FIN2	384.6	45.23	0.809	0.011	0.0977	0.001	0.47039	601.2	6	600.6	5.8	605	27	600.6	5.8	0.0998004
GJ1_25.FIN2	383.3	46.1	0.815	0.0094	0.09777	0.00091	0.54139	604.8	5.2	601.3	5.3	612	23	601.3	5.3	0.578704
GJ1_26.FIN2	384.4	45.8	0.805	0.012	0.0976	0.0011	0.41887	598.9	6.7	600.2	6.5	588	32	600.2	6.5	0.217065
GJ1_27.FIN2	384	46.8	0.806	0.012	0.0975	0.0011	0.48635	599.2	6.8	599.6	6.7	588	31	599.6	6.7	0.0667557
GJ1_28.FIN2	383.9	45.7	0.809	0.011	0.0974	0.0011	0.55212	601.3	6.3	599.2	6.4	615	27	599.2	6.4	0.349243
GJ1_29.FIN2	384	45.1	0.819	0.012	0.0979	0.0012	0.36891	606.7	6.8	602	7.2	600	35	602	7.2	0.774683
GJ1_30.FIN2	383.8	45.7	0.798	0.012	0.0976	0.0014	0.5101	594.6	7	600.3	8.2	556	32	600.3	8.2	0.958628
GJ1_31.FIN2	384.1	45	0.817	0.012	0.0979	0.0012	0.45634	605.5	6.5	603.1	7.2	611	29	603.1	7.2	0.396367
GJ1_32.FIN2	384	46.2	0.808	0.015	0.0964	0.0014	0.43134	600.4	8.2	593.1	8.3	626	38	593.1	8.3	1.21586
GJ1_33.FIN2	384.1	45.5	0.806	0.015	0.0989	0.0017	0.62309	598.9	8.3	608	10	563	32	608	10	1.51945
GJ1_34.FIN2	383.5	45.7	0.809	0.017	0.0974	0.0018	0.41782	600.6	9.4	599	11	604	46	599	11	0.2664
GJ1_35.FIN2	385	46.4	0.805	0.017	0.0981	0.0019	0.60522	597.9	9.4	603	11	595	39	603	11	0.852985
GJ1_36.FIN2	383.3	45.9	0.79	0.014	0.0962	0.0017	0.53907	590.2	8.3	592.1	9.8	612	38	592.1	9.8	0.321925
GJ1_37.FIN2	384	46.5	0.822	0.013	0.0975	0.0014	0.49709	608.5	7.1	599.4	8.5	652	33	599.4	8.5	1.49548
GJ1_38.FIN2	383	44.4	0.824	0.013	0.0997	0.0016	0.49268	610.5	7.2	612.4	9.1	608	33	612.4	9.1	0.31122
GJ1_39.FIN2	384.4	46.11	0.817	0.012	0.0974	0.0012	0.45785	605.7	6.7	598.9	6.9	643	30	598.9	6.9	1.12267
GJ1_40.FIN2	383	45	0.7939	0.0094	0.0973	0.00087	0.4337	592.9	5.3	598.5	5.1	587	27	598.5	5.1	0.94451
GJ1_41.FIN2	386	46	0.811	0.011	0.09734	0.00097	0.46612	602.2	6.1	598.7	5.7	611	26	598.7	5.7	0.581202
GJ1_42.FIN2	382	46.6	0.818	0.012	0.0984	0.001	0.48764	606.3	6.5	604.9	6.1	588	27	604.9	6.1	0.230909
GJ1_43.FIN2	385.3	45.5	0.807	0.012	0.097	0.0011	0.49499	600.2	6.7	596.7	6.4	575	30	596.7	6.4	0.583139
GJ1_44.FIN2	383	45.2	0.809	0.011	0.0984	0.0011	0.56347	601	6.4	604.7	6.6	566	26	604.7	6.6	0.615641
GJ1_45.FIN2	384	46.6	0.8	0.013	0.0967	0.0011	0.59415	595.8	7.4	594.7	6.3	579	29	594.7	6.3	0.184626
GJ1_46.FIN2	384	45.7	0.819	0.013	0.0983	0.0012	0.62154	606.6	7.4	604.5	7	603	30	604.5	7	0.346192
GJ1_47.FIN2	384.1	45.58	0.808	0.011	0.09763	0.00095	0.36357	601.7	6.3	600.4	5.6	591	30	600.4	5.6	0.216055
GJ1_48.FIN2	384.1	45.2	0.8099	0.0095	0.0975	0.00085	0.32525	601.9	5.4	599.7	5	611	27	599.7	5	0.365509
GJ1_49.FIN2	383.5	45.61	0.815	0.011	0.09752	0.00096	0.36347	604.5	6.4	599.7	5.7	620	30	599.7	5.7	0.794045
GJ1_50.FIN2	384.3	45.89	0.803	0.01	0.09778	0.00083	0.45654	598	5.7	601.3	4.9	574	26	601.3	4.9	0.551839
GJ1_51.FIN2	384	45.7	0.813	0.01	0.09769	0.00096	0.41814	603.6	5.8	600.7	5.6	611	26	600.7	5.6	0.480451
GJ1_52.FIN2	383.6	46.4	0.8042	0.0096	0.0972	0.0011	0.3751	598.7	5.4	597.8	6.6	607	28	597.8	6.6	0.150326
GJ1_53.FIN2	384.6	45.48	0.812	0.01	0.09773	0.00099	0.43423	603.2	5.7	601	5.8	619	25	601	5.8	0.364721
GJ1_54.FIN2	383.6	45.7	0.81	0.012	0.0974	0.0011	0.55118	601.8	6.8	599.2	6.5	613	27	599.2	6.5	0.432037
GJ1_55.FIN2	384	45.6	0.811	0.014	0.0984	0.0012	0.56671	602.2	7.6	604.8	6.9	586	31	604.8	6.9	0.43175
GJ1_56.FIN2	384.1	45.57	0.808	0.011	0.0972	0.0011	0.36645	600.8	6.3	597.7	6.6	629	31	597.7	6.6	0.515979
GJ1_57.FIN2	384.1	46.11	0.807	0.011	0.0972	0.001	0.61259	600	6.4	598.1	6.1	632	25	598.1	6.1	0.316667
GJ1_58.FIN2	383.7	45.2	0.813	0.011	0.0981	0.001	0.4531	604.1	6.5	603.4	6	606	28	603.4	6	0.115875
GJ1_59.FIN2	384.3	45.7	0.809	0.01	0.0976	0.0011	0.45783	602	5.6	600.2	6.4	606	28	600.2	6.4	0.299003
GJ1_60.FIN2	383.8	45.7	0.818	0.014	0.0975	0.0011	0.51981	605.9	7.8	599.5	6.3	632	32	599.5	6.3	1.05628
GJ1_61.FIN2	384.2	46.1	0.804	0.011	0.0975	0.0012	0.54728	598.2	6.2	599.4	7.2	603	28	599.4	7.2	0.200602
GJ1_62.FIN2	384.1	45.4	0.809	0.013	0.0981	0.0012	0.49702	601.2	7.5	603.4	7.1	596	31	603.4	7.1	0.365935
GJ1_63.FIN2	383	46	0.803	0.013	0.097	0.0011	0.67922	598.7	7.4	596.9	6.3	592	27	596.9	6.3	0.300651
GJ1_64.FIN2	381	45.4	0.804	0.021	0.0979	0.0025	0.62664	598	12	602	15	533	47	602	15	0.668896
GJ1_65.FIN2	400	48.3	0.78	0.021	0.0966	0.0026	0.72114	585	12	594	15	512	42	594	15	1.53846
GJ1_66.FIN2	378.5	44.7	0.86	0.021	0.0988	0.0019	0.6539	628	12	607	11	636	40	607	11	3.34395
Pak1_1.FIN2	133.9	1.439	0.0466	0.0029	0.00672	0.00017	0.13303	46.1	2.8	43.2	1.1	160	120	43.2	1.1	6.29067
Pak1_2.FIN2	132.3	1.463	0.0447	0.003	0.00682	0.00018	0.033803	44.3	2.9	43.8	1.2	120	130	43.8	1.2	1.12867
Pak1_3.FIN2	389	1.294	0.0428	0.0019	0.00668	0.00014	0.053571	42.5	1.9	42.94	0.87	49	87	42.94	0.87	1.03529
Pak1_4.FIN2	412	1.179	0.0453	0.0016	0.00709	0.00015	0.36098	45	1.6	45.51	0.94	51	66	45.51	0.94	1.13333
Pak1_5.FIN2	428	1.184	0.0474	0.0022	0.00709	0.00015	0.24758	46.9	2.1	45.52	0.96	145	90	45.52	0.96	2.94243
Pak1_6.FIN2	435	1.222	0.0458	0.0018	0.00698	0.00014	0.31167	45.5	1.8	44.82	0.88	100	75	44.82	0.88	1.49451
Pak1_7.FIN2	316.9	1.338	0.0429	0.0019	0.00695	0.00016	0.079299	42.6	1.9	44.7	1	11	87	44.7	1	4.92958
Pak1_8.FIN2	220.9	1.462	0.0438	0.0026	0.00639	0.00016	0.10161	43.5	2.5	41.1	1	140	110	41.1	1	5.51724
Plesovice_1.FIN2	586	8.55	0.3916	0.0063	0.05284	0.0006	0.4942	335.2	4.6	331.9	3.7	331	33	331.9	3.7	0.984487
Plesovice_2.FIN2	619	8.66	0.3846	0.0059	0.05304	0.00048	0.40367	330.1	4.3	333.1	2.9	317	33	333.1	2.9	0.908816
Plesovice_3.FIN2	621	8.96	0.3915	0.0059	0.05284	0.00061	0.46839	335.1	4.3	331.9	3.7	353	32	331.9	3.7	0.954939
Plesovice_4.FIN2	638	8.11	0.3802	0.0057	0.05296	0.00053	0.38847	326.9	4.2	332.6	3.2	271	33	332.6	3.2	1.74365
Plesovice_5.FIN2	696	8.3	0.3957	0.0062	0.05409	0.00061	0.577	338.2	4.4	339.6	3.8	339	30	339.6	3.8	0.413956
Plesovice_6.FIN2	728	8.42	0.3943	0.0059	0.05405	0.00056	0.51004	337.2	4.3	339.3	3.4	306	30	339.3	3.4	0.622776
Plesovice_7.FIN2	726	8.51	0.395	0.0059	0.05408	0.00053	0.41945	337.7	4.3	339.5	3.3	346	32	339.5	3.3	0.533017
Plesovice_8.FIN2	631	8.54	0.3848	0.005	0.05169	0.0005	0.49199	330.8	3.7	324.9	3.1	344	28	324.9	3.1	1.78356
VSS1_1.FIN2	66.9	2.231	1.755	0.06	0.1683	0.0035	0.49575	0	22	1002	19	1031	61	1031	61	2.8128
VSS1_2.FIN2	286	4.56	0.804	0.012	0.097	0.0011	0.2825	598.1	6.5	596.8	6.2	564	34	596.8	6.2	0.217355
VSS1_3.FIN2	317	0.973	0.586	0.014	0.0671	0.001	0.41503	467.4	9	418.7	6.1	674	49	418.7	6.1	10.4193
VSS1_4.FIN2	23.36	0.689	14.88	0.26	0.5438	0.009	0.52488	2806	16	2796	37	2787	28	2787	28	0.322928
VSS1_5.FIN2	59	2.4	1.88	0.05	0.1737	0.0024	0.35465	1071	18	1032	13	1117	51	1117	51	7.60967
VSS1_6.FIN2	57.1	2.42	3.69	0.11	0.2464	0.0078	0.51538	1563	23	1417	40	1762	55	1762	55	19.58
VSS1_7.FIN2	268.1	1.99	0.765	0.02	0.0931	0.002	0.4995	575	12	573	12	573	51	573	12	0.347826
VSS1_8.FIN2	504	16.64	12.46	0.26	0.4583	0.0095	0.66613	2635	20	2429	42	2795	27	2795	27	13.0948
VSS1_9.FIN2	299	1.629	4.075	0.068	0.2902	0.0052	0.68837	1646	14	1641	26	1663	25	1663	25	1.32291
VSS1_10.FIN2	362	2.77	1.855	0.061	0.1773	0.0056	0.693	1063	22	1050	31	1099	51	1099	51	4.4586
VSS1_11.FIN2	115	2.15	0.85	0.043	0.0985	0.0045	0.65879	620	23	605	27	706	86	605	27	2.41935
VSS1_12.FIN2	1080	25.2	0.532	0.027	0.0661	0.0034	0.58889	432	17	412	21	552	94	412	21	4.62963	Rim
VSS1_12.FIN2	197.2	1.838	0.942	0.026	0.103	0.0023	0.48836	673	14	632	13	816	54	632	13	6.09212	Core
VSS1_13.FIN2	56	0.817	1.529	0.046	0.1543	0.0031	0.33395	937	19	925	18	960	65	960	65	3.64583
VSS1_14.FIN2	81.9	3.74	0.796	0.05	0.0819	0.004	0.34647	590	28	507	24	920	130	507	24	14.0678
VSS1_15.FIN2	423	1.292	0.773	0.015	0.0938	0.0016	0.43323	580.9	8.3	578.1	9.6	595	40	578.1	9.6	0.482011
VSS1_16.FIN2	193	4.34	1.331	0.055	0.135	0.0054	0.57857	855	24	821	33	981	73	821	33	3.97661
VSS1_17.FIN2	107.7	1.022	4.116	0.072	0.2806	0.0042	0.47973	1656	14	1594	21	1754	31	1754	31	9.12201
VSS1_18.FIN2	489	3.01	4.26	0.14	0.2592	0.0071	0.86839	1671	28	1482	37	1946	29	1946	29	23.8438
VSS1_19.FIN2	72.9	1.445	1.587	0.029	0.1621	0.0019	0.25726	964	12	968	11	967	38	967	38	0.103413
VSS1_20.FIN2	118	0.832	1.719	0.03	0.1668	0.0022	0.444	1014	11	994	12	1066	34	1066	34	6.75422
VSS1_21.FIN2	219	9.3	0.666	0.015	0.0824	0.0011	0.26321	517	9	510.6	6.6	551	49	510.6	6.6	1.23791
VSS1_22.FIN2	208.2	1.79	7.27	0.25	0.353	0.013	0.80253	2132	31	1949	62	2354	40	2354	40	17.2048
VSS1_23.FIN2	111.9	2.61	0.794	0.023	0.097	0.0019	0.3479	591	13	597	11	588	65	597	11	1.01523
VSS1_24.FIN2	433	1.38	0.6283	0.0087	0.08217	0.00091	0.32624	494.5	5.4	509	5.4	432	36	509	5.4	2.93225
VSS1_25.FIN2	332.9	1.582	5.508	0.079	0.343	0.0048	0.63911	1901	13	1900	23	1909	22	1909	22	0.471451
VSS1_26.FIN2	597	1.677	1.819	0.035	0.1716	0.0047	0.62587	1051	13	1020	26	1119	43	1119	43	8.84718	Rim
VSS1_26.FIN2	400.3	4.6	2.434	0.045	0.2127	0.0036	0.5648	1252	13	1243	19	1282	32	1282	32	3.04212	Core
VSS1_27.FIN2	801	2.009	3.26	0.13	0.1447	0.0054	0.4187	1468	31	870	30	2498	72	2498	72	65.1721	Rim
VSS1_27.FIN2	232	2.407	4.36	0.19	0.269	0.011	0.69758	1698	37	1535	54	1923	60	1923	60	20.1768	Core
VSS1_28.FIN2	329	0.933	0.575	0.01	0.074	0.0012	0.30392	460.7	6.5	459.8	7.1	464	44	459.8	7.1	0.195355
VSS1_29.FIN2	200	2.82	0.659	0.025	0.0818	0.0026	0.598	511	15	506	15	527	66	506	15	0.978474
VSS1_30.FIN2	152	2.3	0.69	0.016	0.0854	0.0012	0.28004	531.4	9.9	528.2	7.2	530	52	528.2	7.2	0.602183
VSS1_31.FIN2	379	10.94	0.595	0.018	0.0707	0.002	0.5348	474	11	440	12	645	62	440	12	7.173
VSS1_32.FIN2	295.2	1.442	0.697	0.018	0.0847	0.0017	0.49747	536	11	524	9.8	583	52	524	9.8	2.23881
VSS1_33.FIN2	286	4.27	1.036	0.042	0.0937	0.0048	0.51311	720	20	577	28	1201	85	577	28	19.8611	Rim
VSS1_33.FIN2	366	2.636	1.692	0.064	0.1521	0.0053	0.71314	1003	24	912	30	1214	55	1214	55	24.8764	Core
VSS1_34.FIN2	146.9	1.185	4.331	0.067	0.3017	0.004	0.7492	1696	13	1699	20	1689	20	1689	20	0.592066
VSS1_35.FIN2	215.6	1.444	4.02	0.1	0.2815	0.0065	0.81599	1637	20	1597	33	1688	29	1688	29	5.391
VSS1_36.FIN2	246	1.88	0.432	0.023	0.0529	0.0027	0.69047	363	16	332	17	538	95	332	17	8.53994	Rim
VSS1_36.FIN2	158.9	1.181	3.61	0.061	0.2614	0.0053	0.56633	1553	13	1496	27	1640	34	1640	34	8.78049	Core
VSS1_37.FIN2	107	2.05	0.698	0.025	0.0804	0.0024	0.5864	534	15	498	15	675	69	498	15	6.74157
VSS1_38.FIN2	250.4	2.91	3.284	0.049	0.2588	0.0044	0.55907	1475	12	1485	22	1467	30	1467	30	1.22699
VSS1_39.FIN2	570	5.62	0.924	0.058	0.0582	0.0056	0.51492	663	31	365	34	1900	140	DISC	DISC	44.9472	Rim
VSS1_39.FIN2	192	9.82	3.97	0.15	0.199	0.0071	0.85763	1622	32	1167	38	2287	37	2287	37	48.9725	Core
VSS1_40.FIN2	313	10.34	0.764	0.047	0.0948	0.0062	0.72867	575	28	583	37	515	67	583	37	1.3913	Rim
VSS1_40.FIN2	182.7	1.679	1.631	0.036	0.1615	0.0028	0.47594	980	14	965	15	1023	42	1023	42	5.6696	Core
VSS1_41.FIN2	212.6	0.854	0.877	0.034	0.1047	0.005	0.54168	637	18	641	29	665	91	641	29	0.627943
VSS1_42.FIN2	349	7.7	3.72	0.12	0.2571	0.0087	0.62628	1568	26	1470	44	1707	53	1707	53	13.884
VSS1_43.FIN2	105.3	1.918	3.541	0.066	0.278	0.0054	0.61051	1532	15	1579	27	1489	32	1489	32	6.04433
VSS1_44.FIN2	231	1.933	3.596	0.064	0.2448	0.0047	0.64173	1548	15	1410	24	1736	30	1736	30	18.7788
VSS1_45.FIN2	238	3.58	0.482	0.014	0.0635	0.0015	0.57795	398.2	9.3	398	9.4	391	53	398	9.4	0.050226
VSS1_46.FIN2	173.6	1.86	0.607	0.024	0.074	0.0027	0.61686	479	15	460	16	571	73	460	16	3.9666
VSS1_47.FIN2	13.6	-237	0.731	0.049	0.0803	0.0032	0.14719	543	28	497	19	700	140	497	19	8.47145
VSS1_48.FIN2	225	4	1.635	0.077	0.1657	0.0088	0.7812	982	32	985	49	995	70	995	70	1.00503
VSS1_49.FIN2	226.3	2.54	0.828	0.026	0.1022	0.0029	0.55695	609	14	627	17	530	60	627	17	2.95567
VSS1_50.FIN2	780	3.37	0.874	0.036	0.0572	0.0028	0.56065	636	19	358	17	1767	76	DISC	DISC	43.7107	Rim
VSS1_50.FIN2	328	2.166	0.959	0.027	0.0866	0.0025	0.60712	681	14	535	15	1199	56	DISC	DISC	21.4391	Core
VSS1_51.FIN2	254.6	0.843	0.56	0.015	0.0725	0.0017	0.45251	451.6	9.2	451	10	439	58	451	10	0.132861
VSS1_52.FIN2	415	2.28	0.623	0.019	0.0784	0.0019	0.46565	491	12	488	12	479	65	488	12	0.610998
VSS1_53.FIN2	170	1.234	0.366	0.015	0.0495	0.0017	0.54847	316	11	311	11	351	82	311	11	1.58228
VSS1_54.FIN2	179.4	1.705	0.461	0.011	0.0621	0.0011	0.33731	383.4	8	388.1	6.5	326	55	388.1	6.5	1.22587
VSS1_55.FIN2	312	1.945	2.543	0.065	0.1921	0.0049	0.86855	1285	19	1131	26	1541	25	1541	25	26.6061
VSS1_56.FIN2	91.7	2.24	27.18	0.51	0.6896	0.0095	0.6007	3383	19	3377	36	3383	24	3383	24	0.177357
VSS1_57.FIN2	167	0.717	0.614	0.018	0.0778	0.0012	0.27304	484	11	482.7	7.3	477	65	482.7	7.3	0.268595
VSS1_58.FIN2	181.4	2.86	2.049	0.044	0.1882	0.0039	0.61852	1130	15	1111	21	1157	37	1157	37	3.9758
VSS1_60.FIN2	163.8	1.003	0.515	0.012	0.0667	0.00091	0.41738	420.8	7.8	416.2	5.5	426	45	416.2	5.5	1.09316
VSS1_61.FIN2	180	1.554	0.539	0.014	0.0709	0.0016	0.44446	437.5	9.6	441.4	9.4	402	56	441.4	9.4	0.891429
VSS1_62.FIN2	229.5	2.37	0.8	0.025	0.0963	0.002	0.57619	596	14	593	12	622	57	593	12	0.503356
VSS1_63.FIN2	108.1	1.061	0.807	0.021	0.1021	0.0024	0.36996	599	12	626	14	506	57	626	14	4.50751
VSS1_64.FIN2	174.1	0.823	0.38	0.018	0.045	0.0022	0.59297	325	13	283	13	639	91	283	13	12.9231
VSS1_65.FIN2	137.5	0.901	0.666	0.019	0.0824	0.0019	0.41304	518	12	510	11	533	65	510	11	1.5444
VSS1_66.FIN2	308	2.82	1.473	0.042	0.1413	0.0044	0.57812	917	17	850	25	1097	51	1097	51	22.516
VSS1_67.FIN2	151.9	3.38	1.084	0.035	0.1163	0.0036	0.60697	743	17	709	21	874	52	709	21	4.57604
VSS1_68.FIN2	56.1	1.447	0.73	0.027	0.0879	0.0025	0.3306	553	16	543	15	587	82	543	15	1.80832
VSS1_69.FIN2	178.1	1.884	0.786	0.015	0.0977	0.0022	0.59088	588.7	8.6	600	13	549	40	600	13	1.91948
VSS1_70.FIN2	201.9	1.216	0.655	0.013	0.0788	0.0013	0.59358	510.5	8	488.5	7.7	626	42	488.5	7.7	4.3095
VSS1_71.FIN2	284	5.53	0.645	0.019	0.0637	0.0017	0.21357	503	12	398	11	1014	51	DISC	DISC	20.8748
VSS1_72.FIN2	123.9	3.577	4.062	0.064	0.2911	0.004	0.51364	1645	13	1646	20	1646	27	1646	27	0
VSS1_73.FIN2	51.4	0.736	0.833	0.022	0.095	0.0017	0.26465	613	12	584.8	9.9	709	60	584.8	9.9	4.60033
VSS1_74.FIN2	96.7	1.909	4.33	0.15	0.2539	0.0089	0.68718	1693	28	1456	46	2010	50	2010	50	27.5622
VSS1_75.FIN2	185	2.22	3.1	0.12	0.235	0.011	0.77516	1427	30	1357	56	1557	55	1557	55	12.8452
VSS1_76.FIN2	104	2	2.722	0.051	0.2208	0.0043	0.49338	1331	14	1285	22	1421	35	1421	35	9.57072
VSS1_77.FIN2	147.2	1.37	0.303	0.01	0.0423	0.001	0.53547	267.7	8	266.8	6.4	292	61	266.8	6.4	0.336197
VSS1_78.FIN2	52.9	0.967	1.801	0.046	0.1764	0.0035	0.45333	1043	17	1047	19	1036	49	1036	49	1.06178
VSS1_79.FIN2	65.9	2.429	1.917	0.047	0.1876	0.0038	0.68529	1087	16	1107	21	1065	40	1065	40	3.94366
VSS1_80.FIN2	391	13.46	0.563	0.016	0.0736	0.002	0.6075	452	10	457	12	424	52	457	12	1.10619
VSS1_81.FIN2	94.4	3.39	1.801	0.043	0.1742	0.0032	0.48345	1042	15	1035	18	1057	45	1057	45	2.08136
VSS1_82.FIN2	85.7	1.75	1.595	0.05	0.1635	0.0039	0.72817	961	20	975	22	937	44	937	44	4.0555
VSS1_83.FIN2	44.93	0.855	1.952	0.049	0.1852	0.0035	0.5278	1096	17	1094	19	1116	44	1116	44	1.97133
VSS1_84.FIN2	59.3	1.69	6.24	0.15	0.3836	0.0099	0.67013	2002	21	2087	46	1926	41	1926	41	8.35929
VSS1_85.FIN2	399	7.66	1.271	0.096	0.1224	0.0082	0.79051	824	43	743	47	1057	96	743	47	9.8301	Rim
VSS1_85.FIN2	182.5	1.597	2.277	0.06	0.205	0.0043	0.57373	1202	19	1201	23	1207	45	1207	45	0.4971	Core
VSS1_86.FIN2	62.3	0.96	0.92	0.023	0.105	0.0018	0.32923	661	12	644	10	690	57	644	10	2.57186
VSS1_87.FIN2	250.4	2.644	1.763	0.034	0.1727	0.003	0.55891	1029	12	1026	17	1036	37	1036	37	0.965251
VSS1_88.FIN2	239	2.897	0.403	0.02	0.0499	0.0024	0.63306	343	14	314	15	547	86	314	15	8.45481
VSS1_89.FIN2	808	9.46	0.928	0.022	0.1089	0.0031	0.61478	667	12	666	18	670	51	666	18	0.149925
VSS1_90.FIN2	157.1	2.67	1.68	0.031	0.169	0.0025	0.53807	1000	11	1006	14	972	35	972	35	3.49794
VSS1_91.FIN2	74.4	3.11	0.756	0.026	0.0945	0.0023	0.50376	569	15	581	14	499	66	581	14	2.10896
VSS1_92.FIN2	357	1.818	0.624	0.012	0.0798	0.0015	0.43776	491.2	7.7	494.8	8.7	477	46	494.8	8.7	0.732899
VSS1_93.FIN2	107.4	-50	0.825	0.018	0.102	0.0017	0.4715	609.3	9.9	625.6	9.7	554	45	625.6	9.7	2.6752
VSS1_94.FIN2	140.6	2.368	1.571	0.029	0.1613	0.0027	0.52962	957	11	964	15	941	34	941	34	2.44421
VSS1_95.FIN2	468	1.052	0.565	0.014	0.0575	0.0017	0.48168	455.7	9.3	360	10	978	56	DISC	DISC	21.0007
VSS1_96.FIN2	90.7	1.51	1.788	0.04	0.1761	0.0029	0.46848	1039	15	1045	16	1015	41	1015	41	2.95567
VSS1_97.FIN2	278	18.9	1.084	0.055	0.1141	0.0053	0.77484	743	27	696	31	890	81	696	31	6.32571	Rim
VSS1_97.FIN2	85.2	2.01	1.475	0.055	0.1494	0.003	0.418	917	22	897	17	958	70	958	70	6.36743	Core
VSS1_98.FIN2	64.8	1.464	1.242	0.043	0.1246	0.0033	0.52658	814	19	762	20	979	61	762	20	6.38821
VSS1_99.FIN2	741	27.5	1.888	0.077	0.1772	0.0067	0.72593	1072	27	1050	37	1120	57	1120	57	6.25	Rim
VSS1_99.FIN2	352	9.22	4.81	0.17	0.317	0.01	0.67644	1779	31	1771	50	1798	49	1798	49	1.50167
VSS1_100.FIN2	28.5	1.83	0.881	0.057	0.102	0.0043	0.39238	634	30	625	25	650	130	625	25	1.41956
VSS1_101.FIN2	176	2.237	1.66	0.041	0.1504	0.0037	0.5433	990	15	905	21	1185	46	1185	46	23.6287
VSS1_102.FIN2	426	6.21	2.812	0.078	0.2159	0.0058	0.79988	1359	21	1258	31	1528	36	1528	36	17.6702
VSS1_103.FIN2	370	1.941	0.3037	0.0088	0.04178	0.00092	0.50041	268.4	6.8	263.8	5.7	300	56	263.8	5.7	1.71386
VSS1_104.FIN2	152.7	2.59	0.612	0.014	0.0785	0.0011	0.36318	483.6	8.8	487	6.4	442	50	487	6.4	0.70306
VSS1_105.FIN2	148.9	0.666	0.699	0.016	0.0863	0.0015	0.62895	536.1	9.8	533.6	8.9	529	41	533.6	8.9	0.466331
VSS1_106.FIN2	144	2.15	2.322	0.069	0.2105	0.0053	0.81171	1219	20	1234	27	1189	35	1189	35	3.78469
VSS1_107.FIN2	81.1	1.795	1.678	0.055	0.1671	0.0048	0.65617	993	21	995	26	986	51	986	51	0.912779
VSS1_108.FIN2	91.8	4.68	0.407	0.023	0.0405	0.0016	0.54438	345	16	255.9	9.8	960	100	DISC	DISC	25.8261
VSS1_109.FIN2	69.9	2.16	0.417	0.019	0.0551	0.0018	0.51405	353	13	345	11	379	83	345	11	2.26629
VSS1_110.FIN2	255	0.854	3.046	0.073	0.2453	0.0057	0.59942	1418	19	1412	29	1426	42	1426	42	0.981767
VSS1_111.FIN2	337	3.85	2.001	0.045	0.1893	0.004	0.68515	1115	15	1116	22	1104	33	1104	33	1.08696
VSS1_112.FIN2	452	1.979	2.604	0.037	0.2264	0.0031	0.49345	1301	11	1315	16	1263	27	1263	27	4.11718
VSS1_113.FIN2	193	1.752	3.428	0.06	0.2668	0.004	0.36365	1509	13	1523	20	1475	37	1475	37	3.25424
VSS1_114.FIN2	167.1	1.644	1.962	0.058	0.1957	0.0062	0.60179	1099	20	1151	33	990	55	990	55	16.2626
VSS1_115.FIN2	181.1	1.382	2.289	0.054	0.2088	0.0043	0.67949	1208	16	1221	23	1179	35	1179	35	3.56234
VSS1_116.FIN2	183	1.898	4.08	0.1	0.2882	0.007	0.69794	1647	21	1630	35	1673	35	1673	35	2.57023
VSS1_117.FIN2	699	20.2	0.841	0.043	0.0839	0.004	0.049531	617	24	519	24	990	140	519	24	15.8833	Rim
VSS1_117.FIN2	58	1.451	10.27	0.47	0.448	0.018	0.70898	2452	43	2383	80	2520	58	2520	58	5.43651	Core
VSS1_118.FIN2	89.3	1.016	1.257	0.074	0.1015	0.0046	0.64961	822	33	623	27	1405	90	DISC	DISC	24.2092	Rim
VSS1_118.FIN2	24.98	0.645	2.557	0.089	0.2191	0.0057	0.74245	1282	25	1275	30	1295	47	1295	47	1.5444	Core
VSS1_120.FIN2	317.6	2.65	2.298	0.042	0.2065	0.0034	0.71659	1211	12	1209	18	1249	26	1249	26	3.20256
VSS1_121.FIN2	191	1.723	0.349	0.015	0.0484	0.0018	0.629	303	11	305	11	311	74	305	11	0.660066
VSS1_122.FIN2	282	1.818	0.892	0.023	0.0916	0.002	0.46855	646	12	565	12	934	51	565	12	12.5387
VSS1_123.FIN2	34.24	0.885	1.877	0.064	0.1813	0.0055	0.59781	1067	22	1072	30	1057	59	1057	59	1.41911
VSS1_124.FIN2	300	1.858	1.955	0.043	0.1923	0.0041	0.69304	1098	15	1132	22	1033	32	1033	32	9.58374
VSS1_125.FIN2	266	1.809	2.102	0.066	0.1835	0.0054	0.81133	1144	21	1084	29	1253	40	1253	40	13.4876
VSS1_126.FIN2	146.2	1.173	0.744	0.016	0.094	0.0016	0.53733	563.2	9.4	578.6	9.3	491	43	578.6	9.3	2.73438
VSS1_127.FIN2	411	1.96	0.796	0.021	0.0929	0.0021	0.61197	592	12	573	12	664	47	573	12	3.20946
VSS1_128.FIN2	209.3	1.05	1.865	0.038	0.1789	0.0031	0.59535	1068	13	1060	17	1082	36	1082	36	2.03327
VSS1_129.FIN2	144.9	0.4896	0.732	0.017	0.0909	0.0011	0.20283	556.3	9.6	560.5	6.5	521	47	560.5	6.5	0.754988
VSS1_130.FIN2	307	12.25	0.842	0.016	0.1011	0.0014	0.50428	619.9	8.9	620.6	8.3	617	36	620.6	8.3	0.112921
VSS1_131.FIN2	250	6.23	1.36	0.091	0.138	0.011	0.70014	867	39	832	65	980	120	832	65	4.03691	Rim
VSS1_131.FIN2	120.1	1.212	2.798	0.063	0.2375	0.0048	0.55929	1352	17	1373	25	1334	38	1334	38	2.92354	Core
VSS1_132.FIN2	333	2.59	6.07	0.25	0.366	0.015	0.93216	1965	38	1994	73	1963	28	1963	28	1.57922
VSS1_133.FIN2	387	1.868	0.401	0.011	0.0503	0.0011	0.50183	341.2	8.2	316.5	6.8	522	56	316.5	6.8	7.23916
VSS1_134.FIN2	137.9	1.99	0.741	0.014	0.0929	0.0014	0.38238	562	8.2	572.4	8.3	526	42	572.4	8.3	1.85053
VSS1_135.FIN2	111.9	1.815	0.743	0.018	0.0898	0.0016	0.42309	563	10	554.1	9.3	603	50	554.1	9.3	1.58082
VSS1_136.FIN2	197	1.772	0.619	0.02	0.0797	0.0019	0.53181	486	13	494	11	468	64	494	11	1.64609
VSS1_137.FIN2	362	1.334	0.619	0.015	0.0782	0.0017	0.62202	488.7	9.4	485	10	532	43	485	10	0.757111
VSS1_139.FIN2	202.1	0.7	0.801	0.022	0.1044	0.0026	0.65701	595	13	640	15	455	48	640	15	7.56303
VSS1_140.FIN2	107.3	1.446	3.31	0.12	0.2421	0.0085	0.60639	1477	27	1395	44	1631	55	1631	55	14.4697
VSS2_2.FIN2	146	0.971	0.752	0.017	0.0928	0.0014	0.4897	567.6	9.8	571.7	8.4	563	44	571.7	8.4	0.72234
VSS2_3.FIN2	394	2.639	0.466	0.011	0.057	0.0014	0.56894	387.5	7.5	357	8.6	606	48	357	8.6	7.87097
VSS2_4.FIN2	193	2.429	4.35	0.09	0.2974	0.007	0.58406	1698	17	1684	36	1747	38	1747	38	3.60618
VSS2_5.FIN2	125	0.909	0.548	0.013	0.0737	0.0011	0.08282	444.1	8.3	458.1	6.4	388	54	458.1	6.4	3.15244
VSS2_7.FIN2	118.2	0.4478	0.787	0.019	0.0949	0.0014	0.16839	588	11	584.5	8.5	600	58	584.5	8.5	0.595238
VSS2_8.FIN2	189.7	3.12	5.19	0.11	0.3305	0.0063	0.69877	1849	17	1839	30	1876	29	1876	29	1.97228
VSS2_10.FIN2	299	1.582	3.459	0.066	0.254	0.0052	0.68609	1516	15	1457	27	1596	31	1596	31	8.70927
VSS2_11.FIN2	201.5	1.602	0.864	0.02	0.0988	0.0022	0.65089	630	11	607	13	719	42	607	13	3.65079
VSS2_12.FIN2	172	0.64	0.4582	0.009	0.0605	0.0011	0.29913	382.3	6.3	378.4	6.8	407	51	378.4	6.8	1.02014
VSS2_13.FIN2	184.3	2.375	1.68	0.037	0.1635	0.0036	0.64983	1000	14	975	20	1061	39	1061	39	8.10556
VSS2_14.FIN2	238.1	1.239	0.795	0.02	0.089	0.0022	0.4717	592	11	549	13	767	54	549	13	7.26351
VSS2_15.FIN2	107.6	1.15	3.065	0.094	0.2342	0.0056	0.76867	1418	24	1355	29	1524	38	1524	38	11.0892
VSS2_16.FIN2	268	4.88	1.302	0.033	0.1306	0.0032	0.60719	844	14	790	18	1006	45	790	18	6.3981
VSS2_17.FIN2	282	1.724	3.517	0.076	0.2592	0.0051	0.71849	1526	17	1484	26	1602	28	1602	28	7.36579
VSS2_18.FIN2	608	2.94	0.967	0.058	0.1061	0.0055	0.64079	670	29	647	32	760	100	647	32	3.43284
VSS2_19.FIN2	105.4	2.47	0.82	0.023	0.0995	0.0026	0.45201	605	13	611	15	637	59	611	15	0.991736
VSS2_20.FIN2	645	7.49	0.528	0.012	0.0664	0.0012	0.58116	430.2	7.5	414.6	7	525	42	414.6	7	3.62622
VSS2_21.FIN2	43.4	2.513	1.866	0.067	0.1846	0.0062	0.50412	1064	24	1089	33	1019	76	1019	76	6.86948
VSS2_23.FIN2	106.2	1.567	2.77	0.09	0.2142	0.0064	0.75163	1342	24	1249	34	1545	40	1545	40	19.1586
VSS2_25.FIN2	130.1	2.01	2.3	0.13	0.204	0.01	0.759	1192	39	1189	54	1238	73	1238	73	3.958
VSS2_26.FIN2	104.4	1.357	0.769	0.026	0.0945	0.0033	0.53501	578	16	581	19	548	75	581	19	0.519031
VSS2_27.FIN2	82.2	0.354	1.872	0.06	0.1766	0.0045	0.61458	1069	20	1047	25	1087	52	1087	52	3.67985
VSS2_28.FIN2	50.4	0.952	2.808	0.065	0.2414	0.0051	0.56325	1352	17	1392	27	1276	42	1276	42	9.09091
VSS2_29.FIN2	409	2.45	0.528	0.012	0.0687	0.0013	0.44231	429.7	7.7	428.3	7.9	411	49	428.3	7.9	0.325809
VSS2_30.FIN2	76.5	1.385	0.907	0.03	0.1006	0.0022	0.55783	653	17	618	13	733	61	618	13	5.35988
VSS2_31.FIN2	358	1.394	0.561	0.016	0.0738	0.0019	0.60862	450	10	459	11	384	52	459	11	2
VSS2_32.FIN2	405	5.34	1.324	0.069	0.128	0.0058	0.68517	851	30	775	33	1031	75	775	33	8.93067	Rim
VSS2_32.FIN2	221.4	2.22	2.453	0.082	0.2043	0.0078	0.83679	1253	24	1196	42	1347	42	1347	42	11.2101	Core
VSS2_33.FIN2	209.9	3.09	0.559	0.021	0.0732	0.0024	0.65136	447	14	455	15	391	65	455	15	1.78971
VSS2_34.FIN2	245.2	1.064	2.319	0.034	0.2116	0.003	0.7059	1217	11	1237	16	1157	22	1157	22	6.91443
VSS2_35.FIN2	64.4	2.45	1.951	0.054	0.1773	0.0042	0.41481	1093	18	1051	23	1171	51	1171	51	10.2477
VSS2_36.FIN2	97.1	2.04	1.959	0.054	0.1857	0.004	0.63947	1096	19	1097	22	1066	46	1066	46	2.90807
VSS2_37.FIN2	296	3.64	0.551	0.022	0.0691	0.0024	0.58608	447	14	431	14	482	74	431	14	3.57942
VSS2_38.FIN2	403	7.13	2.101	0.069	0.1816	0.0065	0.70242	1143	23	1072	35	1272	53	1272	53	15.7233
VSS2_39.FIN2	184	1.33	3.81	0.12	0.2861	0.0092	0.73819	1598	23	1621	48	1530	46	1530	46	5.94771
VSS2_40.FIN2	361	1.135	0.5724	0.0096	0.0739	0.001	0.45455	458.8	6.2	459.7	6.2	418	35	459.7	6.2	0.196164
VSS2_41.FIN2	46.9	1.139	0.52	0.019	0.0675	0.0013	0.23059	422	13	420.9	7.9	386	77	420.9	7.9	0.260664
VSS2_42.FIN2	417	9.08	0.816	0.022	0.0936	0.0021	0.65496	604	12	577	12	692	48	577	12	4.4702
VSS2_43.FIN2	341	4.41	0.596	0.031	0.0749	0.0033	0.56976	472	20	465	20	481	99	465	20	1.48305	Rim
VSS2_43.FIN2	343	3.7	0.862	0.036	0.0933	0.0029	0.62266	632	20	574	17	822	72	574	17	9.17722	Core
VSS2_44.FIN2	556	2.883	3.672	0.072	0.2803	0.0061	0.68637	1561	16	1590	30	1521	31	1521	31	4.53649
VSS2_45.FIN2	124	3.84	2.459	0.08	0.2202	0.0068	0.61307	1256	24	1279	36	1212	54	1212	54	5.52805
VSS2_46.FIN2	110.5	1.202	4.594	0.092	0.3234	0.0065	0.70706	1743	17	1804	32	1667	29	1667	29	8.21836
VSS2_47.FIN2	151.7	2.48	3.61	0.12	0.2858	0.0088	0.70141	1540	26	1615	44	1432	47	1432	47	12.7793
VSS2_48.FIN2	353	1.66	0.633	0.011	0.0815	0.0013	0.33732	498	7.3	505.1	7.7	448	42	505.1	7.7	1.4257
VSS2_50.FIN2	219.3	0.932	0.915	0.015	0.1081	0.0016	0.40227	658.7	8.2	661.4	9.4	639	38	661.4	9.4	0.409898
VSS2_51.FIN2	318	2.8	4.64	0.16	0.288	0.011	0.81052	1744	28	1623	53	1896	39	1896	39	14.3987
VSS2_52.FIN2	246.4	1.992	3.003	0.052	0.2594	0.0043	0.55669	1405	13	1486	22	1290	30	1290	30	15.1938
VSS2_53.FIN2	187	1.672	3.153	0.086	0.2522	0.0073	0.74475	1440	22	1446	37	1440	38	1440	38	0.416667
VSS2_54.FIN2	321	1.091	12.44	0.59	0.485	0.023	0.79276	2617	45	2532	99	2701	51	2701	51	6.25694
VSS2_55.FIN2	376	18	0.849	0.031	0.0891	0.0045	0.64753	621	17	549	27	911	87	549	27	11.5942
VSS2_56.FIN2	138.3	1.172	0.618	0.026	0.0778	0.0018	0.2523	487	16	483	11	496	88	483	11	0.821355
VSS2_57.FIN2	140	6.8	0.578	0.043	0.0676	0.0028	0.61739	460	28	422	17	670	150	422	17	8.26087	Rim
VSS2_57.FIN2	27.49	1.048	1.964	0.076	0.1864	0.0043	0.29162	1103	28	1106	25	1092	84	1092	84	1.28205	Core
VSS2_58.FIN2	387	6.25	0.615	0.015	0.0733	0.0015	0.61228	486.4	9.3	455.8	8.9	628	51	455.8	8.9	6.29112
VSS2_59.FIN2	258	2.3	2.078	0.038	0.2047	0.0039	0.6942	1139	13	1199	21	1042	31	1042	31	15.0672
VSS2_60.FIN2	581	2.223	3.897	0.096	0.276	0.0061	0.65904	1609	20	1569	31	1678	34	1678	34	6.49583
VSS2_61.FIN2	449	0.888	0.456	0.011	0.0571	0.001	0.53829	380.5	7.9	358	6.1	518	47	358	6.1	5.91327
VSS2_62.FIN2	163	4.34	2.419	0.042	0.2213	0.0039	0.57336	1247	12	1287	21	1176	33	1176	33	9.43878
VSS2_63.FIN2	130.4	2.69	4.64	0.18	0.299	0.011	0.71045	1744	32	1679	56	1846	51	1846	51	9.04659
VSS2_64.FIN2	335	11.2	3.31	0.15	0.206	0.0086	0.93251	1467	36	1203	46	1901	29	1901	29	36.7175
VSS2_65.FIN2	717	17.93	0.561	0.011	0.0701	0.0013	0.52109	452.7	7.7	436.4	8.1	547	43	436.4	8.1	3.60062
VSS2_66.FIN2	105.8	1.021	0.993	0.03	0.1154	0.0034	0.59455	696	15	703	19	670	58	703	19	1.00575
VSS2_68.FIN2	118	2.39	0.938	0.03	0.1109	0.0033	0.48873	670	16	677	19	639	68	677	19	1.04478
VSS2_69.FIN2	37.2	0.951	0.698	0.034	0.0869	0.0028	0.53128	532	20	536	17	494	85	536	17	0.75188
VSS2_70.FIN2	102.8	0.848	1.741	0.034	0.1712	0.0032	0.37581	1021	13	1018	17	1017	44	1017	44	0.0983284
VSS2_71.FIN2	141.5	3.621	1.971	0.043	0.1906	0.0035	0.66604	1102	14	1124	19	1035	34	1035	34	8.59903
VSS2_72.FIN2	170.9	1.605	2.996	0.064	0.2461	0.0041	0.58441	1404	16	1417	21	1377	34	1377	34	2.90487
VSS2_73.FIN2	490	3.63	1.761	0.052	0.1727	0.0064	0.85562	1025	20	1024	35	1061	36	1061	36	3.48728
VSS2_74.FIN2	133.3	1.568	0.642	0.018	0.0795	0.0018	0.36438	503	11	493	11	522	62	493	11	1.98807
VSS2_75.FIN2	327	7.12	4.87	0.11	0.3175	0.0083	0.81338	1789	20	1779	39	1798	28	1798	28	1.05673
VSS2_76.FIN2	55.8	1.247	0.623	0.036	0.0755	0.0035	0.4937	491	23	469	21	600	120	469	21	4.48065	Rim
VSS2_76.FIN2	38.4	0.831	1.186	0.077	0.1268	0.0061	0.48213	788	36	769	35	840	130	769	35	2.41117	Core
VSS2_77.FIN2	371.9	1.81	2.08	0.032	0.1946	0.0029	0.51622	1141	11	1146	15	1127	30	1127	30	1.68589
VSS2_78.FIN2	224	1.749	1.448	0.09	0.1437	0.007	0.7744	903	38	864	39	999	84	999	84	13.5135	Rim
VSS2_78.FIN2	46.6	1.923	3.06	0.1	0.2445	0.0068	0.63818	1417	26	1408	35	1426	48	1426	48	1.26227	Core
VSS2_79.FIN2	707	14.35	1.424	0.027	0.1415	0.0027	0.75734	897	11	852	15	1025	24	1025	24	16.878
VSS2_80.FIN2	546	6.02	0.5503	0.009	0.07181	0.00091	0.65378	444.5	6	446.9	5.5	438	28	446.9	5.5	0.539933
VSS2_82.FIN2	402.7	3.96	0.571	0.016	0.0743	0.0019	0.76859	457	10	462	11	424	43	462	11	1.09409
VSS2_83.FIN2	327	0.86	0.615	0.018	0.0726	0.002	0.56868	484	11	451	12	642	54	451	12	6.81818
VSS2_84.FIN2	520	0.867	0.578	0.014	0.0706	0.0015	0.4569	462.6	8.8	439.3	9.3	582	54	439.3	9.3	5.03675
VSS2_85.FIN2	124	1.31	3.64	0.052	0.2784	0.0034	0.58377	1556	11	1582	17	1524	23	1524	23	3.80577
VSS2_86.FIN2	173.9	1.341	6.8	0.28	0.383	0.014	0.70611	2066	39	2077	67	2086	54	2086	54	0.431448
VSS2_87.FIN2	91.5	2.695	2.03	0.059	0.1863	0.004	0.66807	1121	20	1101	22	1169	39	1169	39	5.81694
VSS2_88.FIN2	346	3.01	3.73	0.16	0.268	0.011	0.66771	1566	33	1524	56	1627	62	1627	62	6.33067
VSS2_89.FIN2	328	1.508	0.952	0.019	0.1103	0.0022	0.50757	677.4	9.9	674	13	691	43	674	13	0.501919
VSS2_90.FIN2	53.5	3.51	1.887	0.046	0.1752	0.003	0.43718	1073	16	1040	16	1138	50	1138	50	8.6116
VSS2_91.FIN2	125	1.8	0.398	0.016	0.0533	0.0018	0.5365	339	12	334	11	370	74	334	11	1.47493
VSS2_92.FIN2	199.2	1.525	0.516	0.022	0.0662	0.003	0.402	423	15	413	18	479	96	413	18	2.36407
VSS2_93.FIN2	296	5	0.512	0.019	0.0665	0.0025	0.69494	417	13	414	15	425	62	414	15	0.719424
VSS2_94.FIN2	115.6	1.186	3.74	0.12	0.291	0.0083	0.57789	1571	26	1643	42	1474	53	1474	53	11.4654
VSS2_95.FIN2	158	0.871	6.2	0.15	0.3365	0.0089	0.76807	1999	22	1865	43	2147	31	2147	31	13.1346
VSS2_96.FIN2	346	1.377	0.624	0.014	0.059	0.0016	0.54651	491.1	8.7	369	9.9	1116	50	DISC	DISC	24.8626
VSS2_97.FIN2	604	4.89	1.65	0.14	0.0833	0.0033	0.62302	960	54	519	21	2110	130	DISC	DISC	45.9375
VSS2_98.FIN2	92.3	1.718	3.467	0.072	0.2722	0.0063	0.5258	1515	16	1549	32	1473	42	1473	42	5.15954
VSS2_99.FIN2	133.4	0.754	1.293	0.038	0.118	0.0024	0.43152	840	17	719	14	1190	55	719	14	14.4048
VSS2_100.FIN2	91	1.446	1.841	0.031	0.1773	0.0025	0.49902	1058	11	1052	14	1088	32	1088	32	3.30882
VSS2_101.FIN2	371	1.326	0.537	0.032	0.0569	0.0035	0.55907	434	21	357	21	890	120	357	21	17.7419
VSS2_102.FIN2	265	12	0.883	0.05	0.1037	0.007	0.69428	640	27	635	41	700	100	635	41	0.78125	Rim
VSS2_102.FIN2	86.9	1.397	1.517	0.06	0.1413	0.0033	0.45695	930	24	851	19	1146	75	1146	75	25.7417	Core
VSS2_103.FIN2	81.6	0.865	4.361	0.081	0.3195	0.0052	0.6327	1701	15	1786	26	1620	27	1620	27	10.2469
VSS2_104.FIN2	142.9	3.05	1.771	0.034	0.1805	0.0029	0.57163	1032	12	1069	16	974	34	974	34	9.75359
VSS2_105.FIN2	204	1.375	0.768	0.014	0.0963	0.0013	0.40224	577.1	8.1	592.5	7.6	526	40	592.5	7.6	2.66851
VSS2_106.FIN2	224.2	1.056	0.792	0.023	0.0971	0.0025	0.55216	589	13	597	15	573	56	597	15	1.35823
VSS2_107.FIN2	409	7.64	1.725	0.056	0.1703	0.0055	0.67929	1013	21	1012	30	1039	52	1039	52	2.59865
VSS2_108.FIN2	143.9	2.578	5.26	0.24	0.306	0.0092	0.73277	1852	35	1717	45	2027	49	2027	49	15.2935
VSS2_109.FIN2	361	17.4	0.524	0.02	0.0674	0.0026	0.69641	425	14	420	16	475	65	420	16	1.17647
VSS2_110.FIN2	95.4	1.249	1.487	0.038	0.1435	0.0036	0.56569	921	15	863	20	1075	47	1075	47	19.7209
VSS2_111.FIN2	325	2.9	3.74	0.11	0.2696	0.0078	0.66452	1577	24	1536	39	1628	46	1628	46	5.65111
VSS2_112.FIN2	117.6	2.34	1.652	0.053	0.1649	0.0042	0.61702	985	20	985	24	980	55	980	55	0.510204
VSS2_113.FIN2	135.8	7.14	1.591	0.063	0.1436	0.0064	0.43605	961	24	863	36	1205	89	1205	89	28.3817	Rim
VSS2_113.FIN2	64.7	5.27	1.895	0.064	0.1818	0.0052	0.26706	1076	23	1076	29	1083	78	1083	78	0.646353	Core
VSS2_114.FIN2	111.1	1.437	0.526	0.019	0.0564	0.002	0.62996	427	12	353	12	862	66	353	12	17.3302
VSS2_115.FIN2	347	2.36	1.129	0.03	0.0921	0.0025	0.57461	764	14	568	15	1400	49	DISC	DISC	25.6545
VSS2_116.FIN2	326.8	1.398	2.879	0.045	0.2143	0.0027	0.55637	1374	12	1251	14	1570	26	1570	26	20.3185
VSS2_117.FIN2	305	12.3	0.4903	0.0088	0.0645	0.001	0.48545	405.2	6.1	402.8	6.4	427	40	402.8	6.4	0.5923
VSS2_118.FIN2	173.4	2.316	2.721	0.066	0.2358	0.005	0.73223	1329	18	1363	26	1286	33	1286	33	5.98756
VSS2_119.FIN2	179	11.7	2.405	0.045	0.22	0.0043	0.56578	1243	14	1280	23	1185	37	1185	37	8.01688
VSS2_120.FIN2	169	1.924	0.524	0.014	0.0703	0.001	0.37253	426.5	9.1	437.6	6.3	369	54	437.6	6.3	2.60258
VSS2_121.FIN2	493	2.37	0.358	0.018	0.043	0.0021	0.36668	310	14	271	13	560	110	271	13	12.5806
VSS2_122.FIN2	196.2	1.394	5.78	0.25	0.348	0.013	0.57896	1935	39	1919	59	1970	66	1970	66	2.58883
VSS2_123.FIN2	255	1.033	0.992	0.017	0.1153	0.0017	0.57506	701.8	7.9	703	10	714	29	703	10	0.170989
VSS2_124.FIN2	615	7.35	0.625	0.016	0.0606	0.0013	0.64193	493	10	378.9	7.6	1068	41	DISC	DISC	23.144
VSS2_125.FIN2	170	1.315	0.908	0.026	0.1077	0.002	0.40611	654	14	659	12	640	64	659	12	0.764526
VSS2_126.FIN2	229	1.004	3.128	0.066	0.2546	0.0055	0.68935	1436	16	1460	28	1418	32	1418	32	2.96192
VSS2_127.FIN2	226	4.24	3.57	0.15	0.2246	0.0094	0.78811	1536	34	1302	50	1898	49	1898	49	31.4015
VSS2_129.FIN2	237.4	2.369	2.837	0.047	0.236	0.0044	0.42876	1364	13	1365	22	1361	35	1361	35	0.293902
VSS2_130.FIN2	98.1	1.031	1.551	0.034	0.1558	0.0031	0.48379	949	14	933	17	982	45	982	45	4.98982
VSS2_132.FIN2	108.9	0.526	0.665	0.026	0.0759	0.0019	0.64048	514	16	471	11	716	66	471	11	8.36576
VSS2_133.FIN2	310	3.19	1.03	0.056	0.1013	0.0068	0.68323	715	29	619	40	1107	97	619	40	13.4266
VSS2_134.FIN2	233	1.59	0.587	0.03	0.0521	0.002	0.45651	467	20	327	12	1212	94	DISC	DISC	29.9786
VSS2_135.FIN2	199.6	1.454	0.529	0.016	0.068	0.002	0.55934	430	11	424	12	456	60	424	12	1.39535
VSS2_136.FIN2	309	1.248	3.412	0.053	0.2658	0.0049	0.61875	1508	13	1521	26	1481	30	1481	30	2.70088
VSS2_137.FIN2	222	4.4	0.787	0.03	0.096	0.0044	0.60657	589	17	589	26	585	78	589	26	0
VSS2_138.FIN2	44.3	1.376	1.781	0.042	0.1628	0.0028	0.37359	1034	16	972	15	1156	47	1156	47	15.917
VSS2_139.FIN2	315	4.87	0.605	0.024	0.0675	0.0019	0.47724	476	15	421	11	706	73	421	11	11.5546
VSS2_140.FIN2	94	0.751	0.412	0.014	0.0513	0.0012	0.29528	349	10	322.4	7.3	494	76	322.4	7.3	7.62178
GJ1_1.FIN2	389	45.7	0.796	0.011	0.0979	0.0012	0.40915	594.2	6.3	602.1	7.1	567	31	602.1	7.1	1.32952
GJ1_2.FIN2	382.2	45.5	0.819	0.011	0.0967	0.001	0.36419	606.6	6.3	594.7	6.1	643	31	594.7	6.1	1.96175
GJ1_3.FIN2	379.3	45.2	0.826	0.012	0.0981	0.0012	0.30119	610.6	6.7	602.9	7	628	34	602.9	7	1.26105
GJ1_4.FIN2	381.5	45.2	0.807	0.012	0.0976	0.0012	0.55978	601.1	6.8	600.4	6.9	580	28	600.4	6.9	0.116453
GJ1_5.FIN2	391	48.1	0.818	0.025	0.0992	0.003	0.46106	608	14	610	17	526	72	610	17	0.328947
GJ1_6.FIN2	401	48.1	0.795	0.024	0.0981	0.0039	0.53206	593	14	603	23	510	74	603	23	1.68634
GJ1_7.FIN2	369	46.5	0.79	0.018	0.0995	0.0027	0.45937	589	10	613	16	462	56	613	16	4.0747
GJ1_8.FIN2	388	48	0.775	0.022	0.1001	0.0037	0.60334	580	12	613	22	441	63	613	22	5.68966
GJ1_9.FIN2	383.2	44.6	0.817	0.011	0.0973	0.0011	0.27575	606	6.1	598.5	6.7	628	31	598.5	6.7	1.23762
GJ1_10.FIN2	384.8	45.4	0.817	0.014	0.0974	0.0014	0.5762	605.6	7.6	599.1	8.1	635	30	599.1	8.1	1.07332
GJ1_11.FIN2	383.7	46.2	0.8	0.012	0.0975	0.0013	0.48654	597	6.7	599.7	7.6	601	31	599.7	7.6	0.452261
GJ1_12.FIN2	384	46.2	0.81	0.013	0.0977	0.0013	0.58118	601.3	7.4	600.6	7.6	617	31	600.6	7.6	0.116414
GJ1_13.FIN2	383.7	46.1	0.816	0.014	0.0974	0.0012	0.44741	604.5	7.9	599.3	7.2	635	36	599.3	7.2	0.860215
GJ1_14.FIN2	384.3	45.16	0.811	0.012	0.0978	0.0011	0.50099	603.1	6.9	601.3	6.3	612	29	601.3	6.3	0.298458
GJ1_15.FIN2	383.4	45.3	0.809	0.01	0.098	0.001	0.45311	601.1	5.9	602.3	6	591	27	602.3	6	0.199634
GJ1_16.FIN2	385.1	46.07	0.806	0.012	0.09716	0.00087	0.5196	599.3	6.6	597.7	5.1	613	27	597.7	5.1	0.266978
GJ1_17.FIN2	382.9	45.1	0.815	0.011	0.0979	0.001	0.43381	604.5	5.9	602.1	6	615	26	602.1	6	0.397022
GJ1_18.FIN2	385	46.4	0.802	0.011	0.09734	0.00099	0.51859	597.4	6	598.7	5.8	581	27	598.7	5.8	0.21761
GJ1_19.FIN2	383.2	45.9	0.808	0.011	0.0982	0.0011	0.49687	601.6	6	603.5	6.5	569	27	603.5	6.5	0.315824
GJ1_20.FIN2	384.2	45.43	0.8142	0.0097	0.09749	0.00097	0.38055	605	5.6	599.6	5.7	619	26	599.6	5.7	0.892562
GJ1_21.FIN2	384.1	46.08	0.802	0.01	0.09713	0.00093	0.31315	597.5	5.7	597.5	5.5	605	28	597.5	5.5	0
GJ1_22.FIN2	384	45.3	0.823	0.01	0.09836	0.00096	0.41334	609.1	5.8	604.7	5.6	622	27	604.7	5.6	0.722377
GJ1_23.FIN2	383.7	45.63	0.8	0.01	0.09719	0.00089	0.40827	596	5.7	597.8	5.2	592	27	597.8	5.2	0.302013
GJ1_24.FIN2	384.6	45.23	0.809	0.011	0.0977	0.001	0.47039	601.2	6	600.6	5.8	605	27	600.6	5.8	0.0998004
GJ1_25.FIN2	383.3	46.1	0.815	0.0094	0.09777	0.00091	0.54139	604.8	5.2	601.3	5.3	612	23	601.3	5.3	0.578704
GJ1_26.FIN2	384.4	45.8	0.805	0.012	0.0976	0.0011	0.41887	598.9	6.7	600.2	6.5	588	32	600.2	6.5	0.217065
GJ1_27.FIN2	384	46.8	0.806	0.012	0.0975	0.0011	0.48635	599.2	6.8	599.6	6.7	588	31	599.6	6.7	0.0667557
GJ1_28.FIN2	383.9	45.7	0.809	0.011	0.0974	0.0011	0.55212	601.3	6.3	599.2	6.4	615	27	599.2	6.4	0.349243
GJ1_29.FIN2	384	45.1	0.819	0.012	0.0979	0.0012	0.36891	606.7	6.8	602	7.2	600	35	602	7.2	0.774683
GJ1_30.FIN2	383.8	45.7	0.798	0.012	0.0976	0.0014	0.5101	594.6	7	600.3	8.2	556	32	600.3	8.2	0.958628
GJ1_31.FIN2	384.1	45	0.817	0.012	0.0979	0.0012	0.45634	605.5	6.5	603.1	7.2	611	29	603.1	7.2	0.396367
GJ1_32.FIN2	384	46.2	0.808	0.015	0.0964	0.0014	0.43134	600.4	8.2	593.1	8.3	626	38	593.1	8.3	1.21586
GJ1_33.FIN2	384.1	45.5	0.806	0.015	0.0989	0.0017	0.62309	598.9	8.3	608	10	563	32	608	10	1.51945
GJ1_34.FIN2	383.5	45.7	0.809	0.017	0.0974	0.0018	0.41782	600.6	9.4	599	11	604	46	599	11	0.2664
GJ1_35.FIN2	385	46.4	0.805	0.017	0.0981	0.0019	0.60522	597.9	9.4	603	11	595	39	603	11	0.852985
GJ1_36.FIN2	383.3	45.9	0.79	0.014	0.0962	0.0017	0.53907	590.2	8.3	592.1	9.8	612	38	592.1	9.8	0.321925
GJ1_37.FIN2	384	46.5	0.822	0.013	0.0975	0.0014	0.49709	608.5	7.1	599.4	8.5	652	33	599.4	8.5	1.49548
GJ1_38.FIN2	383	44.4	0.824	0.013	0.0997	0.0016	0.49268	610.5	7.2	612.4	9.1	608	33	612.4	9.1	0.31122
GJ1_39.FIN2	384.4	46.11	0.817	0.012	0.0974	0.0012	0.45785	605.7	6.7	598.9	6.9	643	30	598.9	6.9	1.12267
GJ1_40.FIN2	383	45	0.7939	0.0094	0.0973	0.00087	0.4337	592.9	5.3	598.5	5.1	587	27	598.5	5.1	0.94451
GJ1_41.FIN2	386	46	0.811	0.011	0.09734	0.00097	0.46612	602.2	6.1	598.7	5.7	611	26	598.7	5.7	0.581202
GJ1_42.FIN2	382	46.6	0.818	0.012	0.0984	0.001	0.48764	606.3	6.5	604.9	6.1	588	27	604.9	6.1	0.230909
GJ1_43.FIN2	385.3	45.5	0.807	0.012	0.097	0.0011	0.49499	600.2	6.7	596.7	6.4	575	30	596.7	6.4	0.583139
GJ1_44.FIN2	383	45.2	0.809	0.011	0.0984	0.0011	0.56347	601	6.4	604.7	6.6	566	26	604.7	6.6	0.615641
GJ1_45.FIN2	384	46.6	0.8	0.013	0.0967	0.0011	0.59415	595.8	7.4	594.7	6.3	579	29	594.7	6.3	0.184626
GJ1_46.FIN2	384	45.7	0.819	0.013	0.0983	0.0012	0.62154	606.6	7.4	604.5	7	603	30	604.5	7	0.346192
GJ1_47.FIN2	384.1	45.58	0.808	0.011	0.09763	0.00095	0.36357	601.7	6.3	600.4	5.6	591	30	600.4	5.6	0.216055
GJ1_48.FIN2	384.1	45.2	0.8099	0.0095	0.0975	0.00085	0.32525	601.9	5.4	599.7	5	611	27	599.7	5	0.365509
GJ1_49.FIN2	383.5	45.61	0.815	0.011	0.09752	0.00096	0.36347	604.5	6.4	599.7	5.7	620	30	599.7	5.7	0.794045
GJ1_50.FIN2	384.3	45.89	0.803	0.01	0.09778	0.00083	0.45654	598	5.7	601.3	4.9	574	26	601.3	4.9	0.551839
GJ1_51.FIN2	384	45.7	0.813	0.01	0.09769	0.00096	0.41814	603.6	5.8	600.7	5.6	611	26	600.7	5.6	0.480451
GJ1_52.FIN2	383.6	46.4	0.8042	0.0096	0.0972	0.0011	0.3751	598.7	5.4	597.8	6.6	607	28	597.8	6.6	0.150326
GJ1_53.FIN2	384.6	45.48	0.812	0.01	0.09773	0.00099	0.43423	603.2	5.7	601	5.8	619	25	601	5.8	0.364721
GJ1_54.FIN2	383.6	45.7	0.81	0.012	0.0974	0.0011	0.55118	601.8	6.8	599.2	6.5	613	27	599.2	6.5	0.432037
GJ1_55.FIN2	384	45.6	0.811	0.014	0.0984	0.0012	0.56671	602.2	7.6	604.8	6.9	586	31	604.8	6.9	0.43175
GJ1_56.FIN2	384.1	45.57	0.808	0.011	0.0972	0.0011	0.36645	600.8	6.3	597.7	6.6	629	31	597.7	6.6	0.515979
GJ1_57.FIN2	384.1	46.11	0.807	0.011	0.0972	0.001	0.61259	600	6.4	598.1	6.1	632	25	598.1	6.1	0.316667
GJ1_58.FIN2	383.7	45.2	0.813	0.011	0.0981	0.001	0.4531	604.1	6.5	603.4	6	606	28	603.4	6	0.115875
GJ1_59.FIN2	384.3	45.7	0.809	0.01	0.0976	0.0011	0.45783	602	5.6	600.2	6.4	606	28	600.2	6.4	0.299003
GJ1_60.FIN2	383.8	45.7	0.818	0.014	0.0975	0.0011	0.51981	605.9	7.8	599.5	6.3	632	32	599.5	6.3	1.05628
GJ1_61.FIN2	384.2	46.1	0.804	0.011	0.0975	0.0012	0.54728	598.2	6.2	599.4	7.2	603	28	599.4	7.2	0.200602
GJ1_62.FIN2	384.1	45.4	0.809	0.013	0.0981	0.0012	0.49702	601.2	7.5	603.4	7.1	596	31	603.4	7.1	0.365935
GJ1_63.FIN2	383	46	0.803	0.013	0.097	0.0011	0.67922	598.7	7.4	596.9	6.3	592	27	596.9	6.3	0.300651
GJ1_64.FIN2	381	45.4	0.804	0.021	0.0979	0.0025	0.62664	598	12	602	15	533	47	602	15	0.668896
GJ1_65.FIN2	400	48.3	0.78	0.021	0.0966	0.0026	0.72114	585	12	594	15	512	42	594	15	1.53846
GJ1_66.FIN2	378.5	44.7	0.86	0.021	0.0988	0.0019	0.6539	628	12	607	11	636	40	607	11	3.34395
0	0	0	0	0	0	0	0	0	0	0	0	0	0	#DIV/0!	#DIV/0!	#DIV/0!	Rim
0	0	0	0	0	0	0	0	0	0	0	0	0	0	#DIV/0!	#DIV/0!	#DIV/0!	Core
0	0	0	0	0	0	0	0	0	0	0	0	0	0	#DIV/0!	#DIV/0!	#DIV/0!	Core
0	0	0	0	0	0	0	0	0	0	0	0	0	0	#DIV/0!	#DIV/0!	#DIV/0!	Core
0	0	0	0	0	0	0	0	0	0	0	0	0	0	#DIV/0!	#DIV/0!	#DIV/0!	Core
0	0	0	0	0	0	0	0	0	0	0	0	0	0	#DIV/0!	#DIV/0!	#DIV/0!	Core
0	0	0	0	0	0	0	0	0	0	0	0	0	0	#DIV/0!	#DIV/0!	#DIV/0!	Core
0	0	0	0	0	0	0	0	0	0	0	0	0	0	#DIV/0!	#DIV/0!	#DIV/0!	Core
0	0	0	0	0	0	0	0	0	0	0	0	0	0	#DIV/0!	#DIV/0!	#DIV/0!	Core
0	0	0	0	0	0	0	0	0	0	0	0	0	0	#DIV/0!	#DIV/0!	#DIV/0!	Core
0	0	0	0	0	0	0	0	0	0	0	0	0	0	#DIV/0!	#DIV/0!	#DIV/0!	Core
0	0	0	0	0	0	0	0	0	0	0	0	0	0	#DIV/0!	#DIV/0!	#DIV/0!	Core
0	0	0	0	0	0	0	0	0	0	0	0	0	0	#DIV/0!	#DIV/0!	#DIV/0!	Core
0	0	0	0	0	0	0	0	0	0	0	0	0	0	#DIV/0!	#DIV/0!	#DIV/0!	Core
0	0	0	0	0	0	0	0	0	0	0	0	0	0	#DIV/0!	#DIV/0!	#DIV/0!	Core
0	0	0	0	0	0	0	0	0	0	0	0	0	0	#DIV/0!	#DIV/0!	#DIV/0!	Core
0	0	0	0	0	0	0	0	0	0	0	0	0	0	#DIV/0!	#DIV/0!	#DIV/0!	Core
0	0	0	0	0	0	0	0	0	0	0	0	0	0	#DIV/0!	#DIV/0!	#DIV/0!	Core
0	0	0	0	0	0	0	0	0	0	0	0	0	0	#DIV/0!	#DIV/0!	#DIV/0!	Core
0	0	0	0	0	0	0	0	0	0	0	0	0	0	#DIV/0!	#DIV/0!	#DIV/0!	Core
0	0	0	0	0	0	0	0	0	0	0	0	0	0	#DIV/0!	#DIV/0!	#DIV/0!	Core
0	0	0	0	0	0	0	0	0	0	0	0	0	0	#DIV/0!	#DIV/0!	#DIV/0!	Core
0	0	0	0	0	0	0	0	0	0	0	0	0	0	#DIV/0!	#DIV/0!	#DIV/0!	Core
0	0	0	0	0	0	0	0	0	0	0	0	0	0	#DIV/0!	#DIV/0!	#DIV/0!	Core
0	0	0	0	0	0	0	0	0	0	0	0	0	0	#DIV/0!	#DIV/0!	#DIV/0!	Core
0	0	0	0	0	0	0	0	0	0	0	0	0	0	#DIV/0!	#DIV/0!	#DIV/0!	Core
0	0	0	0	0	0	0	0	0	0	0	0	0	0	#DIV/0!	#DIV/0!	#DIV/0!	Core
0	0	0	0	0	0	0	0	0	0	0	0	0	0	#DIV/0!	#DIV/0!	#DIV/0!	Core
0	0	0	0	0	0	0	0	0	0	0	0	0	0	#DIV/0!	#DIV/0!	#DIV/0!	Core
0	0	0	0	0	0	0	0	0	0	0	0	0	0	#DIV/0!	#DIV/0!	#DIV/0!	Core
0	0	0	0	0	0	0	0	0	0	0	0	0	0	#DIV/0!	#DIV/0!	#DIV/0!	Core
0	0	0	0	0	0	0	0	0	0	0	0	0	0	#DIV/0!	#DIV/0!	#DIV/0!	Core
0	0	0	0	0	0	0	0	0	0	0	0	0	0	#DIV/0!	#DIV/0!	#DIV/0!	Core
0	0	0	0	0	0	0	0	0	0	0	0	0	0	#DIV/0!	#DIV/0!	#DIV/0!	Core
0	0	0	0	0	0	0	0	0	0	0	0	0	0	#DIV/0!	#DIV/0!	#DIV/0!	Core
0	0	0	0	0	0	0	0	0	0	0	0	0	0	#DIV/0!	#DIV/0!	#DIV/0!	Core
0	0	0	0	0	0	0	0	0	0	0	0	0	0	#DIV/0!	#DIV/0!	#DIV/0!	Core
0	0	0	0	0	0	0	0	0	0	0	0	0	0	#DIV/0!	#DIV/0!	#DIV/0!	Core
0	0	0	0	0	0	0	0	0	0	0	0	0	0	#DIV/0!	#DIV/0!	#DIV/0!	Core
0	0	0	0	0	0	0	0	0	0	0	0	0	0	#DIV/0!	#DIV/0!	#DIV/0!	Core
0	0	0	0	0	0	0	0	0	0	0	0	0	0	#DIV/0!	#DIV/0!	#DIV/0!	Core
0	0	0	0	0	0	0	0	0	0	0	0	0	0	#DIV/0!	#DIV/0!	#DIV/0!	Core
0	0	0	0	0	0	0	0	0	0	0	0	0	0	#DIV/0!	#DIV/0!	#DIV/0!	Core
0	0	0	0	0	0	0	0	0	0	0	0	0	0	#DIV/0!	#DIV/0!	#DIV/0!	Core
0	0	0	0	0	0	0	0	0	0	0	0	0	0	#DIV/0!	#DIV/0!	#DIV/0!	Core
0	0	0	0	0	0	0	0	0	0	0	0	0	0	#DIV/0!	#DIV/0!	#DIV/0!	Core
0	0	0	0	0	0	0	0	0	0	0	0	0	0	#DIV/0!	#DIV/0!	#DIV/0!	Core
0	0	0	0	0	0	0	0	0	0	0	0	0	0	#DIV/0!	#DIV/0!	#DIV/0!	Core
0	0	0	0	0	0	0	0	0	0	0	0	0	0	#DIV/0!	#DIV/0!	#DIV/0!	Core
0	0	0	0	0	0	0	0	0	0	0	0	0	0	#DIV/0!	#DIV/0!	#DIV/0!	Core
0	0	0	0	0	0	0	0	0	0	0	0	0	0	#DIV/0!	#DIV/0!	#DIV/0!	Core
0	0	0	0	0	0	0	0	0	0	0	0	0	0	#DIV/0!	#DIV/0!	#DIV/0!	Core
0	0	0	0	0	0	0	0	0	0	0	0	0	0	#DIV/0!	#DIV/0!	#DIV/0!	Core
0	0	0	0	0	0	0	0	0	0	0	0	0	0	#DIV/0!	#DIV/0!	#DIV/0!	Core
0	0	0	0	0	0	0	0	0	0	0	0	0	0	#DIV/0!	#DIV/0!	#DIV/0!	Core
0	0	0	0	0	0	0	0	0	0	0	0	0	0	#DIV/0!	#DIV/0!	#DIV/0!	Core
0	0	0	0	0	0	0	0	0	0	0	0	0	0	#DIV/0!	#DIV/0!	#DIV/0!	Core
0	0	0	0	0	0	0	0	0	0	0	0	0	0	#DIV/0!	#DIV/0!	#DIV/0!	Core
0	0	0	0	0	0	0	0	0	0	0	0	0	0	#DIV/0!	#DIV/0!	#DIV/0!	Core
0	0	0	0	0	0	0	0	0	0	0	0	0	0	#DIV/0!	#DIV/0!	#DIV/0!	Core
0	0	0	0	0	0	0	0	0	0	0	0	0	0	#DIV/0!	#DIV/0!	#DIV/0!
0	0	0	0	0	0	0	0	0	0	0	0	0	0	#DIV/0!	#DIV/0!	#DIV/0!
0	0	0	0	0	0	0	0	0	0	0	0	0	0	#DIV/0!	#DIV/0!	#DIV/0!
0	0	0	0	0	0	0	0	0	0	0	0	0	0	#DIV/0!	#DIV/0!	#DIV/0!
0	0	0	0	0	0	0	0	0	0	0	0	0	0	#DIV/0!	#DIV/0!	#DIV/0!
0	0	0	0	0	0	0	0	0	0	0	0	0	0	#DIV/0!	#DIV/0!	#DIV/0!
0														#DIV/0!	#DIV/0!	#DIV/0!
0														#DIV/0!	#DIV/0!	#DIV/0!
0														#DIV/0!	#DIV/0!	#DIV/0!
0														#DIV/0!	#DIV/0!	#DIV/0!
0														#DIV/0!	#DIV/0!	#DIV/0!
0														#DIV/0!	#DIV/0!	#DIV/0!
0														#DIV/0!	#DIV/0!	#DIV/0!
0														#DIV/0!	#DIV/0!	#DIV/0!
0														#DIV/0!	#DIV/0!	#DIV/0!
0														#DIV/0!	#DIV/0!	#DIV/0!
0														#DIV/0!	#DIV/0!	#DIV/0!
0														#DIV/0!	#DIV/0!	#DIV/0!
0														#DIV/0!	#DIV/0!	#DIV/0!
0														#DIV/0!	#DIV/0!	#DIV/0!
0														#DIV/0!	#DIV/0!	#DIV/0!
0														#DIV/0!	#DIV/0!	#DIV/0!
0														#DIV/0!	#DIV/0!	#DIV/0!
0														#DIV/0!	#DIV/0!	#DIV/0!
0														#DIV/0!	#DIV/0!	#DIV/0!
0														#DIV/0!	#DIV/0!	#DIV/0!
0														#DIV/0!	#DIV/0!	#DIV/0!
0														#DIV/0!	#DIV/0!	#DIV/0!
0														#DIV/0!	#DIV/0!	#DIV/0!
0														#DIV/0!	#DIV/0!	#DIV/0!
0														#DIV/0!	#DIV/0!	#DIV/0!
0														#DIV/0!	#DIV/0!	#DIV/0!
0														#DIV/0!	#DIV/0!	#DIV/0!
0														#DIV/0!	#DIV/0!	#DIV/0!
0														#DIV/0!	#DIV/0!	#DIV/0!
0														#DIV/0!	#DIV/0!	#DIV/0!
0														#DIV/0!	#DIV/0!	#DIV/0!
0														#DIV/0!	#DIV/0!	#DIV/0!
0														#DIV/0!	#DIV/0!	#DIV/0!
0														#DIV/0!	#DIV/0!	#DIV/0!
0														#DIV/0!	#DIV/0!	#DIV/0!
0														#DIV/0!	#DIV/0!	#DIV/0!
0														#DIV/0!	#DIV/0!	#DIV/0!
0														#DIV/0!	#DIV/0!	#DIV/0!
0														#DIV/0!	#DIV/0!	#DIV/0!
														#DIV/0!	#DIV/0!	#DIV/0!
														#DIV/0!	#DIV/0!	#DIV/0!
														#DIV/0!	#DIV/0!	#DIV/0!
														#DIV/0!	#DIV/0!	#DIV/0!
														#DIV/0!	#DIV/0!	#DIV/0!
														#DIV/0!	#DIV/0!	#DIV/0!
														#DIV/0!	#DIV/0!	#DIV/0!
														#DIV/0!	#DIV/0!	#DIV/0!
														#DIV/0!	#DIV/0!	#DIV/0!
														#DIV/0!	#DIV/0!	#DIV/0!
														#DIV/0!	#DIV/0!	#DIV/0!
														#DIV/0!	#DIV/0!	#DIV/0!
														#DIV/0!	#DIV/0!	#DIV/0!
														#DIV/0!	#DIV/0!	#DIV/0!
														#DIV/0!	#DIV/0!	#DIV/0!
														#DIV/0!	#DIV/0!	#DIV/0!
														#DIV/0!	#DIV/0!	#DIV/0!
														#DIV/0!	#DIV/0!	#DIV/0!
														#DIV/0!	#DIV/0!	#DIV/0!
														#DIV/0!	#DIV/0!	#DIV/0!
														#DIV/0!	#DIV/0!	#DIV/0!
														#DIV/0!	#DIV/0!	#DIV/0!
														#DIV/0!	#DIV/0!	#DIV/0!
														#DIV/0!	#DIV/0!	#DIV/0!
														#DIV/0!	#DIV/0!	#DIV/0!

## Sheet: Table S8 Sample Coordinates
Table S8
Sample Name:	Latitude	Longitude
TSS1:	30.204225°	-102.967016°
TSS2:	30.204687°	-102.973623°
HF1:	30.208736°	-102.984907°
HF2:	30.212437°	-102.988188°
WCSS1:	30.323490°	-103.234193°
WCSS2:	30.323535°	-103.234836°
LSS1:	30.326233°	-103.235566°
WSS5:	30.382164°	-103.231126°
VSS1:	30.381794°	-103.231211°
VSS2:	30.381872°	-103.231476°
VSS3:	30.396649°	-103.243585°
VSS4:	30.396649°	-103.243585°
ALSS1:	30.383844°	-103.304593°

## Sheet: Table S9 Samples
Table S9
Sample_ID	Order	Unit	Well_Name	Depth_m	Basin	Sample Type	Age	Age_Group1	Group1	Group2	Age Min (Ma)	Age Max (Ma)	GOM_deposode	DepoEnv	Latitude	Longitude	NumGrains	YSG (Ma)	±1σ (Ma)	YC1σ2+ (Ma)	±1σ (Ma)	MSWD	N	YC2σ3+ (Ma)	±1σ (Ma)	MSWD	N	P10	P50	P90	P10P90	Arc	SWL	NEL	NL	Lab	Unpub	Source	Notes
WCSS2	1001	Wolfcamp Sand Stone			Delware	Sand
WSS5	1002	Word Sand Stone			Delware	Sand
VSS1	1003	Vidrio Sand Stone			Delware	Sand
VSS2	1004	Vidrio Sand Stone			Delware	Sand
VSS3	1005	Vidrio Sand Stone			Delware	Sand
VSS4	1006	Vidrio Sand Stone			Delware	Sand
ALSS1	1007	Altuda Sand Stone			Delware	Sand
TSS1	1100	Miss1			Marathon	Sand
TSS2	1101	Miss2			Marathon	Sand
HF1	1102	Penn1			Marathon	Sand
HF2	1103	Penn2			Marathon	Sand
LSS1	1008	Leonardian Sand Stone			Delaware	Sand
WCSS1	1009	Wolfcamp Sand Stone			Delaware	Sand
Bcsand	2	Brush Canyon			Guad. M	Sandstone									31.8483	-104.84
Bcsilt	3	Brush Canyon			Guad. M	Siltstone									32.8483	-104.84
Rader	4	Brush Canyon			Guad. M	sand									31.9316	-104.731
Yates	5	Brush Canyon			Guad. M	sand									32.2826	-104.364
JCT4946	6	Bell Canyon Formation			Dela. Basin	sand									31.32	-103.192
JCT5872	7	Cherry Canyon formation			Dela. Basin	sand									31.32	-103.192
JCT6068	8	Cherry Canyon formation			Dela. Basin	sand									31.32	-103.192
JCT6446	9	Cherry Canyon formation			Dela. Basin	sand									31.32	-103.192

## Sheet: Table S10 ZrUPb
Table S10
Sample_ID	Order_Sample	Analysis_ID	U_ppm	U_Th	Th_U	207Pb_206Pb	207Pb_206Pb_1sigma	207Pb_235U	207Pb_235U_1sigma	206Pb_238U	206Pb_238U_1sigma	RHO	7_5Age	7_5Age_1s_err	6_8Age	6_8Age_1s_err	7_6Age	7_6Age_1s_err	BestAge	BestAge_err	Disc	RimCore
WCSS2	1001	WCSS2_52.FIN2																	320.3	1.3	0.186974
WCSS2	1001	WCSS2_56.FIN2																	346.5	1.65	1.58311
WCSS2	1001	WCSS2_48.FIN2																	439.7	1.65	2.93598
WCSS2	1001	WCSS2_117.FIN2																	421.6	1.7	0.495634
WCSS2	1001	WCSS2_113.FIN2																	353.7	1.75	1.49211
WCSS2	1001	WCSS2_145.FIN2																	537.7	1.8	0.1671
WCSS2	1001	WCSS2_125.FIN2																	656.2	1.8	0.490046
WCSS2	1001	WCSS2_139.FIN2																	468.3	1.85	0.61545
WCSS2	1001	WCSS2_66.FIN2																	468.3	1.9	0.0640205	Rim
WCSS2	1001	WCSS2_108.FIN2																	451.5	2	0.37511
WCSS2	1001	WCSS2_10.FIN2																	626.4	2.05	2.41471
WCSS2	1001	WCSS2_40.FIN2																	579.6	2.1	0.922863
WCSS2	1001	WCSS2_111.FIN2																	333.3	2.15	1.30699
WCSS2	1001	WCSS2_133.FIN2																	339	2.15	1.46663
WCSS2	1001	WCSS2_23.FIN2																	467.4	2.15	0.365042	Rim
WCSS2	1001	WCSS2_146.FIN2																	394.8	2.2	1.1022
WCSS2	1001	WCSS2_39.FIN2																	565	2.2	0.67712
WCSS2	1001	WCSS2_88.FIN2																	599.1	2.2	0.31614
WCSS2	1001	WCSS2_135.FIN2																	338.6	2.25	1.94034
WCSS2	1001	WCSS2_24.FIN2																	406.6	2.25	1.95322
WCSS2	1001	WCSS2_95.FIN2																	477.8	2.3	0.230753
WCSS2	1001	WCSS2_124.FIN2																	540.9	2.3	0.221361
WCSS2	1001	WCSS2_114.FIN2																	549.8	2.3	0.567039
WCSS2	1001	WCSS2_6.FIN2																	633.2	2.3	3.40198
WCSS2	1001	WCSS2_112.FIN2																	439	2.35	0.595784
WCSS2	1001	WCSS2_27.FIN2																	465.3	2.4	0
WCSS2	1001	WCSS2_129.FIN2																	681.8	2.4	0.977488
WCSS2	1001	WCSS2_53.FIN2																	557.4	2.45	0.107759
WCSS2	1001	WCSS2_86.FIN2																	475.2	2.5	0.377358
WCSS2	1001	WCSS2_13.FIN2																	530.4	2.55	0.0565291
WCSS2	1001	WCSS2_136.FIN2																	552.1	2.6	0.181455
WCSS2	1001	WCSS2_102.FIN2																	587.6	2.6	0.541638
WCSS2	1001	WCSS2_123.FIN2																	482.8	2.65	0.943783
WCSS2	1001	WCSS2_84.FIN2																	418.8	2.7	0.263347
WCSS2	1001	WCSS2_91.FIN2																	568.2	2.7	0.993204
WCSS2	1001	WCSS2_46.FIN2																	407	2.75	6.00462
WCSS2	1001	WCSS2_89.FIN2																	526.6	2.75	0.977811
WCSS2	1001	WCSS2_43.FIN2																	654	2.75	0.507146
WCSS2	1001	WCSS2_94.FIN2																	451.9	2.8	0.110522	Rim
WCSS2	1001	WCSS2_31.FIN2																	520.6	2.8	0.696325
WCSS2	1001	WCSS2_42.FIN2																	537.4	2.8	1.68401
WCSS2	1001	WCSS2_76.FIN2																	426.4	2.85	1.06729
WCSS2	1001	WCSS2_122.FIN2																	522.6	2.85	0.627496
WCSS2	1001	WCSS2_51.FIN2																	575.2	2.85	0.656304
WCSS2	1001	WCSS2_109.FIN2																	523.6	3.05	2.26563
WCSS2	1001	WCSS2_87.FIN2																	743	3.15	3.20479	Rim
WCSS2	1001	WCSS2_120.FIN2																	846	3.2	0.27113
WCSS2	1001	WCSS2_90.FIN2																	797.7	3.25	0.337331
WCSS2	1001	WCSS2_45.FIN2																	670.2	3.3	0.29753
WCSS2	1001	WCSS2_36.FIN2																	554.3	3.4	0.840787
WCSS2	1001	WCSS2_2.FIN2																	557.2	3.45	0.942029
WCSS2	1001	WCSS2_9.FIN2																	570.2	3.6	2.86201	Rim
WCSS2	1001	WCSS2_96.FIN2																	326	3.65	0.911854
WCSS2	1001	WCSS2_105.FIN2																	620.4	3.7	1.67987	Core
WCSS2	1001	WCSS2_8.FIN2																	722.9	3.8	10.1094
WCSS2	1001	WCSS2_17.FIN2																	588.3	3.85	0.0510204
WCSS2	1001	WCSS2_57.FIN2																	2817.5	4	3.10559
WCSS2	1001	WCSS2_28.FIN2																	641.9	4.05	0.48062
WCSS2	1001	WCSS2_12.FIN2																	550.6	4.15	0.792793
WCSS2	1001	WCSS2_85.FIN2																	793.2	4.2	0.476788
WCSS2	1001	WCSS2_140.FIN2																	452.4	4.4	10.2381	Rim
WCSS2	1001	WCSS2_58.FIN2																	452.9	4.4	0.264259	Rim
WCSS2	1001	WCSS2_83.FIN2																	719.3	4.45	0.649171
WCSS2	1001	WCSS2_22.FIN2																	627.8	4.5	0.507132
WCSS2	1001	WCSS2_105.FIN2																	575.7	4.65	2.91737	Rim
WCSS2	1001	WCSS2_107.FIN2																	714.4	4.65	0.4782
WCSS2	1001	WCSS2_140.FIN2																	602.8	4.75	1.01806	Core
WCSS2	1001	WCSS2_69.FIN2																	803.7	4.95	3.51741	Core
WCSS2	1001	WCSS2_87.FIN2																	814.3	4.95	1.41646	Core
WCSS2	1001	WCSS2_23.FIN2																	516	5	0	Core
WCSS2	1001	WCSS2_130.FIN2																	542	5	4.91228
WCSS2	1001	WCSS2_9.FIN2																	612	5	2.85714	Core
WCSS2	1001	WCSS2_5.FIN2																	549	5.5	4.37262
WCSS2	1001	WCSS2_69.FIN2																	666	5.5	8.01105	Rim
WCSS2	1001	WCSS2_7.FIN2																	671	5.5	0.592593	Rim
WCSS2	1001	WCSS2_30.FIN2																	801	5.5	2.79126	Core
WCSS2	1001	WCSS2_55.FIN2																	825	5.5	1.31579
WCSS2	1001	WCSS2_16.FIN2																	560	6.5	1.26582
WCSS2	1001	WCSS2_30.FIN2																	708	6.5	0.421941	Rim
WCSS2	1001	WCSS2_67.FIN2																	821	6.5	3.52526
WCSS2	1001	WCSS2_34.FIN2																	1498	6.5	1.66222
WCSS2	1001	WCSS2_132.FIN2																	2109	6.5	3.22428
WCSS2	1001	WCSS2_54.FIN2																	1683	7	2.85205
WCSS2	1001	WCSS2_35.FIN2																	1701	7	0.646678
WCSS2	1001	WCSS2_74.FIN2																	1887	7	0.211977
WCSS2	1001	WCSS2_65.FIN2																	1894	7	0.527983
WCSS2	1001	WCSS2_103.FIN2																	2695	7	4.37848
WCSS2	1001	WCSS2_49.FIN2																	2762	7	3.62056
WCSS2	1001	WCSS2_4.FIN2																	2509	7.5	0.0398565
WCSS2	1001	WCSS2_41.FIN2																	797	8	1.11663
WCSS2	1001	WCSS2_14.FIN2																	527	8.5	0.753296	Rim
WCSS2	1001	WCSS2_66.FIN2																	665	8.5	0	Core
WCSS2	1001	WCSS2_97.FIN2																	1168	8.5	2.38014
WCSS2	1001	WCSS2_70.FIN2																	3300	8.5	0.939394
WCSS2	1001	WCSS2_127.FIN2																	1922	9.5	12.3309
WCSS2	1001	WCSS2_118.FIN2																	1445	10	1.6609
WCSS2	1001	WCSS2_19.FIN2																	2547	10	19.9058
WCSS2	1001	WCSS2_72.FIN2																	1012	10.5	3.15217
WCSS2	1001	WCSS2_11.FIN2																	2603	10.5	15.1748
WCSS2	1001	WCSS2_137.FIN2																	1515	11	0.462046
WCSS2	1001	WCSS2_126.FIN2																	1758	11	0.0568828
WCSS2	1001	WCSS2_33.FIN2																	1101	11.5	2.18892
WCSS2	1001	WCSS2_100.FIN2																	1645	11.5	1.45897
WCSS2	1001	WCSS2_115.FIN2																	1094	12	4.78062
WCSS2	1001	WCSS2_82.FIN2																	1056	12.5	0.94697
WCSS2	1001	WCSS2_58.FIN2																	1408	12.5	23.0114	Core
WCSS2	1001	WCSS2_61.FIN2																	1505	12.5	7.17608
WCSS2	1001	WCSS2_25.FIN2																	1541	12.5	0.194679
WCSS2	1001	WCSS2_75.FIN2																	926	13	1.61987
WCSS2	1001	WCSS2_59.FIN2																	973	13	1.54162	Rim
WCSS2	1001	WCSS2_44.FIN2																	1163	13	0.94583
WCSS2	1001	WCSS2_29.FIN2																	1056	13.5	3.74053
WCSS2	1001	WCSS2_50.FIN2																	1143	13.5	0.778653
WCSS2	1001	WCSS2_106.FIN2																	1556	13.5	3.47044
WCSS2	1001	WCSS2_3.FIN2																	1129	14.5	2.0372
WCSS2	1001	WCSS2_121.FIN2																	1565	14.5	0.766773
WCSS2	1001	WCSS2_38.FIN2																	1766	14.5	1.359
WCSS2	1001	WCSS2_60.FIN2																	1030	15	2.81553
WCSS2	1001	WCSS2_32.FIN2																	1078	15	0.742115	Rim
WCSS2	1001	WCSS2_138.FIN2																	1092	15	1.19048
WCSS2	1001	WCSS2_63.FIN2																	1354	15	5.09601
WCSS2	1001	WCSS2_104.FIN2																	1027	15.5	0.097371
WCSS2	1001	WCSS2_37.FIN2																	1079	15.5	0.315107
WCSS2	1001	WCSS2_93.FIN2																	1048	16	0.763359
WCSS2	1001	WCSS2_144.FIN2																	1111	16	2.66427
WCSS2	1001	WCSS2_26.FIN2																	1322	16	2.42057
WCSS2	1001	WCSS2_110.FIN2																	1079	16.5	4.26321	Rim
WCSS2	1001	WCSS2_142.FIN2																	1944	16.5	0.668724
WCSS2	1001	WCSS2_79.FIN2																	1056	17	1.02273
WCSS2	1001	WCSS2_141.FIN2																	1732	17	12.0092	Rim
WCSS2	1001	WCSS2_143.FIN2																	998	17.5	2.80561
WCSS2	1001	WCSS2_101.FIN2																	1049	17.5	3.81316
WCSS2	1001	WCSS2_7.FIN2																	1237	17.5	12.207	Core
WCSS2	1001	WCSS2_92.FIN2																	947	18	0.242872
WCSS2	1001	WCSS2_47.FIN2																	869	18.5	0.736479
WCSS2	1001	WCSS2_64.FIN2																	953	18.5	4.72193
WCSS2	1001	WCSS2_99.FIN2																	1014	18.5	0.591716	Rim
WCSS2	1001	WCSS2_78.FIN2																	1063	18.5	0.470367
WCSS2	1001	WCSS2_80.FIN2																	1099	19	4.54959
WCSS2	1001	WCSS2_131.FIN2																	1157	19	0.691443
WCSS2	1001	WCSS2_99.FIN2																	1408	19.5	0.78125	Core
WCSS2	1001	WCSS2_71.FIN2																	1046	20.5	4.04398
WCSS2	1001	WCSS2_110.FIN2																	1177	21	3.14359	Core
WCSS2	1001	WCSS2_59.FIN2																	1064	21.5	2.44361	Core
WCSS2	1001	WCSS2_1.FIN2																	1071	21.5	5.88235
WCSS2	1001	WCSS2_141.FIN2																	1789	21.5	6.81945	Core
WCSS2	1001	WCSS2_128.FIN2																	1095	22	5.2968
WCSS2	1001	WCSS2_20.FIN2																	1103	22	4.76881
WCSS2	1001	WCSS2_73.FIN2																	1182	22	0.253807
WCSS2	1001	WCSS2_134.FIN2																	1135	23.5	3.43612
WCSS2	1001	WCSS2_18.FIN2																	1043	25	1.2464
WCSS2	1001	WCSS2_81.FIN2																	922	26.5	0.759219
WCSS2	1001	WCSS2_62.FIN2																	1023	27.5	4.78983
WCSS2	1001	WCSS2_68.FIN2																	1237	28.5	2.02102
WCSS2	1001	WCSS2_21.FIN2																	1045	31	1.72249
WCSS2	1001	WCSS2_15.FIN2																	1260	31.5	0.0793651
WCSS2	1001	WCSS2_14.FIN2																	1459	32.5	11.3091	Core
WCSS2	1001	WCSS2_77.FIN2																	1083	35.5	0.0923361
WCSS2	1001	WCSS2_94.FIN2																	936	38	0.213675	Core
WCSS2	1001	WCSS2_119.FIN2																	1211	39	19.0751
WCSS2	1001	WCSS2_116.FIN2																	1353	40	20.5469
WCSS2	1001	WCSS2_32.FIN2																	1110	65	2.7027	Core
WSS5	1002	WSS5_1.FIN2																	1805	30	0.4
WSS5	1002	WSS5_3.FIN2																	395.4	1.75	0.0505561
WSS5	1002	WSS5_4.FIN2																	350.9	2.2	0.987585
WSS5	1002	WSS5_6.FIN2																	2723	9	18.105
WSS5	1002	WSS5_5.FIN2																	488.1	2.1	1.26556
WSS5	1002	WSS5_7.FIN2																	552.3	3.1	2.07447
WSS5	1002	WSS5_8.FIN2																	988	15.5	1.92308	Rim
WSS5	1002	WSS5_8.FIN2																	1278	22.5	2.11268	Core
WSS5	1002	WSS5_9.FIN2																	1344	12	5.50595	Core
WSS5	1002	WSS5_9.FIN2																	1048	36	18.8931	Rim
WSS5	1002	WSS5_11.FIN2																	1014	12.5	4.20118
WSS5	1002	WSS5_12.FIN2																	606	5	0.655738
WSS5	1002	WSS5_13.FIN2																	1112	19	4.4964
WSS5	1002	WSS5_14.FIN2																	1078	13.5	0.500928
WSS5	1002	WSS5_15.FIN2																	451.9	3	0.489215
WSS5	1002	WSS5_16.FIN2																	562	8.5	3.27022
WSS5	1002	WSS5_17.FIN2																	634.4	3.55	0.719875
WSS5	1002	WSS5_18.FIN2																	438	4	0.725295
WSS5	1002	WSS5_19.FIN2																	388.4	3.25	7.87476
WSS5	1002	WSS5_21.FIN2																	413.6	3.3	0.0966184
WSS5	1002	WSS5_22.FIN2																	442.4	3.15	0.13544
WSS5	1002	WSS5_23.FIN2																	746	10	13.5574
WSS5	1002	WSS5_24.FIN2																	1160	13	10.9483
WSS5	1002	WSS5_25.FIN2																	1532	11	3.98172
WSS5	1002	WSS5_26.FIN2																	1056	15.5	1.98864
WSS5	1002	WSS5_27.FIN2																	621.5	3.9	2.72343
WSS5	1002	WSS5_28.FIN2																	1017	21	2.45821
WSS5	1002	WSS5_29.FIN2																	542	8	0
WSS5	1002	WSS5_30.FIN2																	1094	17	11.1517
WSS5	1002	WSS5_31.FIN2																	401.6	4.4	1.56863
WSS5	1002	WSS5_32.FIN2																	435.9	2.65	0.683527
WSS5	1002	WSS5_33.FIN2																	1418	17	3.52609
WSS5	1002	WSS5_34.FIN2																	448	5	0.719424
WSS5	1002	WSS5_35.FIN2																	994	22	0.402414
WSS5	1002	WSS5_36.FIN2																	626.7	2.75	1.0109
WSS5	1002	WSS5_37.FIN2																	553	7	0.718133
WSS5	1002	WSS5_39.FIN2																	1236	9	0.671521
WSS5	1002	WSS5_40.FIN2																	617.3	2.5	0.652209
WSS5	1002	WSS5_41.FIN2																	1628	10	0.675676
WSS5	1002	WSS5_42.FIN2																	1444	8.5	0.900277
WSS5	1002	WSS5_43.FIN2																	467	3.7	0	Core
WSS5	1002	WSS5_43.FIN2																	344.3	2.05	1.68475	Rim
WSS5	1002	WSS5_44.FIN2																	848	6	0.351288
WSS5	1002	WSS5_45.FIN2																	1055	13	2.06635
WSS5	1002	WSS5_46.FIN2																	1484	13.5	0.471698
WSS5	1002	WSS5_47.FIN2																	958	16	0.313152
WSS5	1002	WSS5_48.FIN2																	584.8	4.3	2.85714
WSS5	1002	WSS5_49.FIN2																	1114	16.5	1.43627
WSS5	1002	WSS5_50.FIN2																	451.5	2.7	1.31148
WSS5	1002	WSS5_51.FIN2																	1521	8.5	1.51216
WSS5	1002	WSS5_52.FIN2																	571.8	3.3	1.41379
WSS5	1002	WSS5_53.FIN2																	658.6	3.15	0.213025
WSS5	1002	WSS5_54.FIN2																	466.9	4.45	1.08051
WSS5	1002	WSS5_55.FIN2																	445.7	4.5	3.31887
WSS5	1002	WSS5_56.FIN2																	1613	20	28.6423
WSS5	1002	WSS5_57.FIN2																	1104	17.5	6.06884
WSS5	1002	WSS5_58.FIN2																	1702	17.5	12.4559
WSS5	1002	WSS5_59.FIN2																	722.4	4.55	1.44611
WSS5	1002	WSS5_60.FIN2																	419.8	2.15	13.3719
WSS5	1002	WSS5_61.FIN2																	2098	5.5	2.38322
WSS5	1002	WSS5_62.FIN2																	453	3.75	0.875274
WSS5	1002	WSS5_63.FIN2																	516	8.5	0	Rim
WSS5	1002	WSS5_63.FIN2																	1810	50	37.8453	Core
WSS5	1002	WSS5_64.FIN2																	416	5.5	0.952381
WSS5	1002	WSS5_65.FIN2																	1511	16.5	8.47121
WSS5	1002	WSS5_66.FIN2																	432	12	0.230947	Rim
WSS5	1002	WSS5_66.FIN2																	1101	21.5	2.45232	Core
WSS5	1002	WSS5_67.FIN2																	541.1	4.45	0.533088
WSS5	1002	WSS5_68.FIN2																	1029	12.5	7.19145
WSS5	1002	WSS5_69.FIN2																	1132	14.5	0.530035
WSS5	1002	WSS5_70.FIN2																	610	5.5	0.651466
WSS5	1002	WSS5_71.FIN2																	447.2	4.05	0.178571
WSS5	1002	WSS5_73.FIN2																	1597	18	1.37758
WSS5	1002	WSS5_74.FIN2																	778	9.5	14.0331
WSS5	1002	WSS5_76.FIN2																	1200	20	0.416667
WSS5	1002	WSS5_75.FIN2																	498.9	2.3	0.419162
WSS5	1002	WSS5_77.FIN2																	1080	32.5	1.48148
WSS5	1002	WSS5_78.FIN2																	1503	10	13.7059
WSS5	1002	WSS5_79.FIN2																	1076	7	0.362454
WSS5	1002	WSS5_81.FIN2																	462	6	0.215983
WSS5	1002	WSS5_82.FIN2																	651.8	4.1	1.24242
WSS5	1002	WSS5_83.FIN2																	420.2	3	0.661939
WSS5	1002	WSS5_84.FIN2																	1178	24.5	22.1562
WSS5	1002	WSS5_85.FIN2																	639.4	3.65	0.20373
WSS5	1002	WSS5_88.FIN2																	349	3.2	8.9486
WSS5	1002	WSS5_89.FIN2																	2007	10	33.4828
WSS5	1002	WSS5_90.FIN2																	603.3	4.9	2.22042
WSS5	1002	WSS5_93.FIN2																	396.1	4.6	2.60634
WSS5	1002	WSS5_94.FIN2																	555	8	0.909091
WSS5	1002	WSS5_95.FIN2																	1114	18.5	3.14183
WSS5	1002	WSS5_96.FIN2																	2688	6.5	4.01786
WSS5	1002	WSS5_97.FIN2																	1000	24	1.7
WSS5	1002	WSS5_98.FIN2																	1085	12.5	1.16129
WSS5	1002	WSS5_99.FIN2																	804	9.5	12.035
WSS5	1002	WSS5_100.FIN2																	1117	12	1.99642
WSS5	1002	WSS5_101.FIN2																	981	14.5	1.41692
WSS5	1002	WSS5_102.FIN2																	620.8	3.45	0.615883
WSS5	1002	WSS5_103.FIN2																	1567	18.5	28.0153
WSS5	1002	WSS5_105.FIN2																	622	10	3.11526
WSS5	1002	WSS5_104.FIN2																	308.8	1.6	0.684708
WSS5	1002	WSS5_106.FIN2																	390.4	2.35	5.1967
WSS5	1002	WSS5_107.FIN2																	393.1	2.15	2.40814
WSS5	1002	WSS5_109.FIN2																	611	6.5	5.41796
WSS5	1002	WSS5_108.FIN2																	499.2	2.25	0.339389
WSS5	1002	WSS5_110.FIN2																	623.6	4.6	1.94969
WSS5	1002	WSS5_111.FIN2																	1627	14	11.4321
WSS5	1002	WSS5_113.FIN2																	621	7	7.03593	Rim
WSS5	1002	WSS5_112.FIN2																	435.1	2.05	7.01004
WSS5	1002	WSS5_114.FIN2																	323.8	2.05	4.93247
WSS5	1002	WSS5_114.FIN2																	719	5.5	10.4608	Core
WSS5	1002	WSS5_115.FIN2																	554.4	4.45	1.87611
WSS5	1002	WSS5_116.FIN2																	555.4	2.3	0.483784
WSS5	1002	WSS5_116.FIN2																	394.1	4.2	9.67224
WSS5	1002	WSS5_117.FIN2																	969	24.5	0.825593
WSS5	1002	WSS5_118.FIN2																	607.6	2.7	0.0329056
WSS5	1002	WSS5_119.FIN2																	1983	7	0.252143
WSS5	1002	WSS5_120.FIN2																	1634	12	0.367197
WSS5	1002	WSS5_121.FIN2																	344.9	2.4	0.919276
WSS5	1002	WSS5_122.FIN2																	440	7	2.32558	Rim
WSS5	1002	WSS5_123.FIN2																	830	9.5	10.6566	Core
WSS5	1002	WSS5_124.FIN2																	1161	16	1.11972
WSS5	1002	WSS5_126.FIN2																	1224	17	7.76144
WSS5	1002	WSS5_128.FIN2																	1424	14	3.16011
WSS5	1002	WSS5_130.FIN2																	526	6.5	0.94162
WSS5	1002	WSS5_131.FIN2																	575	5	0.34904
WSS5	1002	WSS5_132.FIN2																	759	10.5	10.0711
WSS5	1002	WSS5_133.FIN2																	397	6.5	0
WSS5	1002	WSS5_134.FIN2																	1607	11	2.61357
WSS5	1002	WSS5_135.FIN2																	554	6	3.31588
WSS5	1002	WSS5_137.FIN2																	1475	7	0.372881
WSS5	1002	WSS5_138.FIN2																	1313	15	1.67555
WSS5	1002	WSS5_139.FIN2																	603	8.5	2.58481
WSS5	1002	WSS5_140.FIN2																	502	5.5	5.99251
WSS5	1002	WSS5_141.FIN2																	628.3	3.6	0.207337
WSS5	1002	WSS5_142.FIN2																	2741	5	0.182415
WSS5	1002	WSS5_143.FIN2																	1040	19	2.59615
WSS5	1002	WSS5_144.FIN2																	1177	18	7.39167
WSS5	1002	WSS5_145.FIN2																	1415	11	0.848057
VSS1	1003	VSS1_24.FIN2																	509	2.7	2.93225
VSS1	1003	VSS1_60.FIN2																	416.2	2.75	1.09316
VSS1	1003	VSS1_103.FIN2																	263.8	2.85	1.71386
VSS1	1003	VSS1_3.FIN2																	418.7	3.05	10.4193
VSS1	1003	VSS1_2.FIN2																	596.8	3.1	0.217355
VSS1	1003	VSS1_77.FIN2																	266.8	3.2	0.336197
VSS1	1003	VSS1_104.FIN2																	487	3.2	0.70306
VSS1	1003	VSS1_54.FIN2																	388.1	3.25	1.22587
VSS1	1003	VSS1_129.FIN2																	560.5	3.25	0.754988
VSS1	1003	VSS1_21.FIN2																	510.6	3.3	1.23791
VSS1	1003	VSS1_133.FIN2																	316.5	3.4	7.23916
VSS1	1003	VSS1_28.FIN2																	459.8	3.55	0.195355
VSS1	1003	VSS1_30.FIN2																	528.2	3.6	0.602183
VSS1	1003	VSS1_57.FIN2																	482.7	3.65	0.268595
VSS1	1003	VSS1_70.FIN2																	488.5	3.85	4.3095
VSS1	1003	VSS1_134.FIN2																	572.4	4.15	1.85053
VSS1	1003	VSS1_130.FIN2																	620.6	4.15	0.112921
VSS1	1003	VSS1_92.FIN2																	494.8	4.35	0.732899
VSS1	1003	VSS1_105.FIN2																	533.6	4.45	0.466331
VSS1	1003	VSS1_135.FIN2																	554.1	4.65	1.58082
VSS1	1003	VSS1_126.FIN2																	578.6	4.65	2.73438
VSS1	1003	VSS1_45.FIN2																	398	4.7	0.050226
VSS1	1003	VSS1_61.FIN2																	441.4	4.7	0.891429
VSS1	1003	VSS1_15.FIN2																	578.1	4.8	0.482011
VSS1	1003	VSS1_93.FIN2																	625.6	4.85	2.6752
VSS1	1003	VSS1_32.FIN2																	524	4.9	2.23881
VSS1	1003	VSS1_73.FIN2																	584.8	4.95	4.60033
VSS1	1003	VSS1_51.FIN2																	451	5	0.132861
VSS1	1003	VSS1_137.FIN2																	485	5	0.757111
VSS1	1003	VSS1_86.FIN2																	644	5	2.57186
VSS1	1003	VSS1_121.FIN2																	305	5.5	0.660066
VSS1	1003	VSS1_53.FIN2																	311	5.5	1.58228
VSS1	1003	VSS1_109.FIN2																	345	5.5	2.26629
VSS1	1003	VSS1_136.FIN2																	494	5.5	1.64609
VSS1	1003	VSS1_65.FIN2																	510	5.5	1.5444
VSS1	1003	VSS1_23.FIN2																	597	5.5	1.01523
VSS1	1003	VSS1_31.FIN2																	440	6	7.173
VSS1	1003	VSS1_80.FIN2																	457	6	1.10619
VSS1	1003	VSS1_52.FIN2																	488	6	0.610998
VSS1	1003	VSS1_122.FIN2																	565	6	12.5387
VSS1	1003	VSS1_7.FIN2																	573	6	0.347826
VSS1	1003	VSS1_127.FIN2																	573	6	3.20946
VSS1	1003	VSS1_62.FIN2																	593	6	0.503356
VSS1	1003	VSS1_64.FIN2																	283	6.5	12.9231
VSS1	1003	VSS1_69.FIN2																	600	6.5	1.91948
VSS1	1003	VSS1_12.FIN2																	632	6.5	6.09212	Core
VSS1	1003	VSS1_91.FIN2																	581	7	2.10896
VSS1	1003	VSS1_63.FIN2																	626	7	4.50751
VSS1	1003	VSS1_88.FIN2																	314	7.5	8.45481
VSS1	1003	VSS1_37.FIN2																	498	7.5	6.74157
VSS1	1003	VSS1_29.FIN2																	506	7.5	0.978474
VSS1	1003	VSS1_68.FIN2																	543	7.5	1.80832
VSS1	1003	VSS1_139.FIN2																	640	7.5	7.56303
VSS1	1003	VSS1_46.FIN2																	460	8	3.9666
VSS1	1003	VSS1_36.FIN2																	332	8.5	8.53994	Rim
VSS1	1003	VSS1_49.FIN2																	627	8.5	2.95567
VSS1	1003	VSS1_89.FIN2																	666	9	0.149925
VSS1	1003	VSS1_47.FIN2																	497	9.5	8.47145
VSS1	1003	VSS1_98.FIN2																	762	10	6.38821
VSS1	1003	VSS1_34.FIN2																	1689	10	0.592066
VSS1	1003	VSS1_12.FIN2																	412	10.5	4.62963	Rim
VSS1	1003	VSS1_67.FIN2																	709	10.5	4.57604
VSS1	1003	VSS1_25.FIN2																	1909	11	0.471451
VSS1	1003	VSS1_14.FIN2																	507	12	14.0678
VSS1	1003	VSS1_117.FIN2																	519	12	15.8833	Rim
VSS1	1003	VSS1_56.FIN2																	3383	12	0.177357
VSS1	1003	VSS1_100.FIN2																	625	12.5	1.41956
VSS1	1003	VSS1_55.FIN2																	1541	12.5	26.6061
VSS1	1003	VSS1_9.FIN2																	1663	12.5	1.32291
VSS1	1003	VSS1_120.FIN2																	1249	13	3.20256
VSS1	1003	VSS1_11.FIN2																	605	13.5	2.41935
VSS1	1003	VSS1_112.FIN2																	1263	13.5	4.11718
VSS1	1003	VSS1_72.FIN2																	1646	13.5	0
VSS1	1003	VSS1_8.FIN2																	2795	13.5	13.0948
VSS1	1003	VSS1_33.FIN2																	577	14	19.8611	Rim
VSS1	1003	VSS1_132.FIN2																	1963	14	1.57922
VSS1	1003	VSS1_4.FIN2																	2787	14	0.322928
VSS1	1003	VSS1_41.FIN2																	641	14.5	0.627943
VSS1	1003	VSS1_35.FIN2																	1688	14.5	5.391
VSS1	1003	VSS1_18.FIN2																	1946	14.5	23.8438
VSS1	1003	VSS1_38.FIN2																	1467	15	1.22699
VSS1	1003	VSS1_44.FIN2																	1736	15	18.7788
VSS1	1003	VSS1_97.FIN2																	696	15.5	6.32571	Rim
VSS1	1003	VSS1_17.FIN2																	1754	15.5	9.12201
VSS1	1003	VSS1_124.FIN2																	1033	16	9.58374
VSS1	1003	VSS1_26.FIN2																	1282	16	3.04212	Core
VSS1	1003	VSS1_43.FIN2																	1489	16	6.04433
VSS1	1003	VSS1_16.FIN2																	821	16.5	3.97661
VSS1	1003	VSS1_111.FIN2																	1104	16.5	1.08696
VSS1	1003	VSS1_94.FIN2																	941	17	2.44421
VSS1	1003	VSS1_20.FIN2																	1066	17	6.75422
VSS1	1003	VSS1_36.FIN2																	1640	17	8.78049	Core
VSS1	1003	VSS1_90.FIN2																	972	17.5	3.49794
VSS1	1003	VSS1_115.FIN2																	1179	17.5	3.56234
VSS1	1003	VSS1_106.FIN2																	1189	17.5	3.78469
VSS1	1003	VSS1_76.FIN2																	1421	17.5	9.57072
VSS1	1003	VSS1_116.FIN2																	1673	17.5	2.57023
VSS1	1003	VSS1_128.FIN2																	1082	18	2.03327
VSS1	1003	VSS1_102.FIN2																	1528	18	17.6702
VSS1	1003	VSS1_40.FIN2																	583	18.5	1.3913	Rim
VSS1	1003	VSS1_87.FIN2																	1036	18.5	0.965251
VSS1	1003	VSS1_58.FIN2																	1157	18.5	3.9758
VSS1	1003	VSS1_113.FIN2																	1475	18.5	3.25424
VSS1	1003	VSS1_39.FIN2																	2287	18.5	48.9725	Core
VSS1	1003	VSS1_19.FIN2																	967	19	0.103413
VSS1	1003	VSS1_131.FIN2																	1334	19	2.92354	Core
VSS1	1003	VSS1_79.FIN2																	1065	20	3.94366
VSS1	1003	VSS1_125.FIN2																	1253	20	13.4876
VSS1	1003	VSS1_22.FIN2																	2354	20	17.2048
VSS1	1003	VSS1_96.FIN2																	1015	20.5	2.95567
VSS1	1003	VSS1_84.FIN2																	1926	20.5	8.35929
VSS1	1003	VSS1_40.FIN2																	1023	21	5.6696	Core
VSS1	1003	VSS1_110.FIN2																	1426	21	0.981767
VSS1	1003	VSS1_26.FIN2																	1119	21.5	8.84718	Rim
VSS1	1003	VSS1_82.FIN2																	937	22	4.0555
VSS1	1003	VSS1_83.FIN2																	1116	22	1.97133
VSS1	1003	VSS1_81.FIN2																	1057	22.5	2.08136
VSS1	1003	VSS1_85.FIN2																	1207	22.5	0.4971	Core
VSS1	1003	VSS1_101.FIN2																	1185	23	23.6287
VSS1	1003	VSS1_85.FIN2																	743	23.5	9.8301	Rim
VSS1	1003	VSS1_118.FIN2																	1295	23.5	1.5444	Core
VSS1	1003	VSS1_78.FIN2																	1036	24.5	1.06178
VSS1	1003	VSS1_99.FIN2																	1798	24.5	1.50167
VSS1	1003	VSS1_74.FIN2																	2010	25	27.5622
VSS1	1003	VSS1_107.FIN2																	986	25.5	0.912779
VSS1	1003	VSS1_66.FIN2																	1097	25.5	22.516
VSS1	1003	VSS1_10.FIN2																	1099	25.5	4.4586
VSS1	1003	VSS1_5.FIN2																	1117	25.5	7.60967
VSS1	1003	VSS1_42.FIN2																	1707	26.5	13.884
VSS1	1003	VSS1_114.FIN2																	990	27.5	16.2626
VSS1	1003	VSS1_33.FIN2																	1214	27.5	24.8764	Core
VSS1	1003	VSS1_75.FIN2																	1557	27.5	12.8452
VSS1	1003	VSS1_140.FIN2																	1631	27.5	14.4697
VSS1	1003	VSS1_6.FIN2																	1762	27.5	19.58
VSS1	1003	VSS1_99.FIN2																	1120	28.5	6.25	Rim
VSS1	1003	VSS1_117.FIN2																	2520	29	5.43651	Core
VSS1	1003	VSS1_123.FIN2																	1057	29.5	1.41911
VSS1	1003	VSS1_27.FIN2																	1923	30	20.1768	Core
VSS1	1003	VSS1_1.FIN2																	1031	30.5	2.8128
VSS1	1003	VSS1_131.FIN2																	832	32.5	4.03691	Rim
VSS1	1003	VSS1_13.FIN2																	960	32.5	3.64583
VSS1	1003	VSS1_97.FIN2																	958	35	6.36743	Core
VSS1	1003	VSS1_48.FIN2																	995	35	1.00503
VSS1	1003	VSS1_27.FIN2																	2498	36	65.1721	Rim
VSS2	1004	VSS2_80.FIN2																	446.9	2.75	0.539933
VSS2	1004	VSS2_61.FIN2																	358	3.05	5.91327
VSS2	1004	VSS2_40.FIN2																	459.7	3.1	0.196164
VSS2	1004	VSS2_120.FIN2																	437.6	3.15	2.60258
VSS2	1004	VSS2_117.FIN2																	402.8	3.2	0.5923
VSS2	1004	VSS2_5.FIN2																	458.1	3.2	3.15244
VSS2	1004	VSS2_12.FIN2																	378.4	3.4	1.02014
VSS2	1004	VSS2_20.FIN2																	414.6	3.5	3.62622
VSS2	1004	VSS2_140.FIN2																	322.4	3.65	7.62178
VSS2	1004	VSS2_105.FIN2																	592.5	3.8	2.66851
VSS2	1004	VSS2_48.FIN2																	505.1	3.85	1.4257
VSS2	1004	VSS2_41.FIN2																	420.9	3.95	0.260664
VSS2	1004	VSS2_29.FIN2																	428.3	3.95	0.325809
VSS2	1004	VSS2_65.FIN2																	436.4	4.05	3.60062
VSS2	1004	VSS2_2.FIN2																	571.7	4.2	0.72234
VSS2	1004	VSS2_7.FIN2																	584.5	4.25	0.595238
VSS2	1004	VSS2_3.FIN2																	357	4.3	7.87097
VSS2	1004	VSS2_58.FIN2																	455.8	4.45	6.29112
VSS2	1004	VSS2_84.FIN2																	439.3	4.65	5.03675
VSS2	1004	VSS2_50.FIN2																	661.4	4.7	0.409898
VSS2	1004	VSS2_123.FIN2																	703	5	0.170989
VSS2	1004	VSS2_91.FIN2																	334	5.5	1.47493
VSS2	1004	VSS2_139.FIN2																	421	5.5	11.5546
VSS2	1004	VSS2_31.FIN2																	459	5.5	2
VSS2	1004	VSS2_82.FIN2																	462	5.5	1.09409
VSS2	1004	VSS2_132.FIN2																	471	5.5	8.36576
VSS2	1004	VSS2_56.FIN2																	483	5.5	0.821355
VSS2	1004	VSS2_74.FIN2																	493	5.5	1.98807
VSS2	1004	VSS2_114.FIN2																	353	6	17.3302
VSS2	1004	VSS2_135.FIN2																	424	6	1.39535
VSS2	1004	VSS2_83.FIN2																	451	6	6.81818
VSS2	1004	VSS2_42.FIN2																	577	6	4.4702
VSS2	1004	VSS2_125.FIN2																	659	6	0.764526
VSS2	1004	VSS2_121.FIN2																	271	6.5	12.5806
VSS2	1004	VSS2_14.FIN2																	549	6.5	7.26351
VSS2	1004	VSS2_11.FIN2																	607	6.5	3.65079
VSS2	1004	VSS2_30.FIN2																	618	6.5	5.35988
VSS2	1004	VSS2_89.FIN2																	674	6.5	0.501919
VSS2	1004	VSS2_37.FIN2																	431	7	3.57942
VSS2	1004	VSS2_99.FIN2																	719	7	14.4048
VSS2	1004	VSS2_93.FIN2																	414	7.5	0.719424
VSS2	1004	VSS2_33.FIN2																	455	7.5	1.78971
VSS2	1004	VSS2_106.FIN2																	597	7.5	1.35823
VSS2	1004	VSS2_19.FIN2																	611	7.5	0.991736
VSS2	1004	VSS2_109.FIN2																	420	8	1.17647
VSS2	1004	VSS2_57.FIN2																	422	8.5	8.26087	Rim
VSS2	1004	VSS2_69.FIN2																	536	8.5	0.75188
VSS2	1004	VSS2_43.FIN2																	574	8.5	9.17722	Core
VSS2	1004	VSS2_92.FIN2																	413	9	2.36407
VSS2	1004	VSS2_16.FIN2																	790	9	6.3981
VSS2	1004	VSS2_26.FIN2																	581	9.5	0.519031
VSS2	1004	VSS2_68.FIN2																	677	9.5	1.04478
VSS2	1004	VSS2_66.FIN2																	703	9.5	1.00575
VSS2	1004	VSS2_43.FIN2																	465	10	1.48305	Rim
VSS2	1004	VSS2_101.FIN2																	357	10.5	17.7419
VSS2	1004	VSS2_76.FIN2																	469	10.5	4.48065	Rim
VSS2	1004	VSS2_34.FIN2																	1157	11	6.91443
VSS2	1004	VSS2_85.FIN2																	1524	11.5	3.80577
VSS2	1004	VSS2_79.FIN2																	1025	12	16.878
VSS2	1004	VSS2_137.FIN2																	589	13	0
VSS2	1004	VSS2_116.FIN2																	1570	13	20.3185
VSS2	1004	VSS2_55.FIN2																	549	13.5	11.5942
VSS2	1004	VSS2_103.FIN2																	1620	13.5	10.2469
VSS2	1004	VSS2_17.FIN2																	1602	14	7.36579
VSS2	1004	VSS2_75.FIN2																	1798	14	1.05673
VSS2	1004	VSS2_46.FIN2																	1667	14.5	8.21836
VSS2	1004	VSS2_8.FIN2																	1876	14.5	1.97228
VSS2	1004	VSS2_64.FIN2																	1901	14.5	36.7175
VSS2	1004	VSS2_77.FIN2																	1127	15	1.68589
VSS2	1004	VSS2_52.FIN2																	1290	15	15.1938
VSS2	1004	VSS2_136.FIN2																	1481	15	2.70088
VSS2	1004	VSS2_59.FIN2																	1042	15.5	15.0672
VSS2	1004	VSS2_44.FIN2																	1521	15.5	4.53649
VSS2	1004	VSS2_10.FIN2																	1596	15.5	8.70927
VSS2	1004	VSS2_95.FIN2																	2147	15.5	13.1346
VSS2	1004	VSS2_18.FIN2																	647	16	3.43284
VSS2	1004	VSS2_100.FIN2																	1088	16	3.30882
VSS2	1004	VSS2_126.FIN2																	1418	16	2.96192
VSS2	1004	VSS2_32.FIN2																	775	16.5	8.93067	Rim
VSS2	1004	VSS2_62.FIN2																	1176	16.5	9.43878
VSS2	1004	VSS2_118.FIN2																	1286	16.5	5.98756
VSS2	1004	VSS2_104.FIN2																	974	17	9.75359
VSS2	1004	VSS2_71.FIN2																	1035	17	8.59903
VSS2	1004	VSS2_72.FIN2																	1377	17	2.90487
VSS2	1004	VSS2_60.FIN2																	1678	17	6.49583
VSS2	1004	VSS2_76.FIN2																	769	17.5	2.41117	Core
VSS2	1004	VSS2_129.FIN2																	1361	17.5	0.293902
VSS2	1004	VSS2_73.FIN2																	1061	18	3.48728
VSS2	1004	VSS2_119.FIN2																	1185	18.5	8.01688
VSS2	1004	VSS2_53.FIN2																	1440	19	0.416667
VSS2	1004	VSS2_15.FIN2																	1524	19	11.0892
VSS2	1004	VSS2_4.FIN2																	1747	19	3.60618
VSS2	1004	VSS2_13.FIN2																	1061	19.5	8.10556
VSS2	1004	VSS2_87.FIN2																	1169	19.5	5.81694
VSS2	1004	VSS2_51.FIN2																	1896	19.5	14.3987
VSS2	1004	VSS2_133.FIN2																	619	20	13.4266
VSS2	1004	VSS2_23.FIN2																	1545	20	19.1586
VSS2	1004	VSS2_102.FIN2																	635	20.5	0.78125	Rim
VSS2	1004	VSS2_28.FIN2																	1276	21	9.09091
VSS2	1004	VSS2_32.FIN2																	1347	21	11.2101	Core
VSS2	1004	VSS2_98.FIN2																	1473	21	5.15954
VSS2	1004	VSS2_70.FIN2																	1017	22	0.0983284
VSS2	1004	VSS2_130.FIN2																	982	22.5	4.98982
VSS2	1004	VSS2_36.FIN2																	1066	23	2.90807
VSS2	1004	VSS2_39.FIN2																	1530	23	5.94771
VSS2	1004	VSS2_111.FIN2																	1628	23	5.65111
VSS2	1004	VSS2_110.FIN2																	1075	23.5	19.7209
VSS2	1004	VSS2_138.FIN2																	1156	23.5	15.917
VSS2	1004	VSS2_47.FIN2																	1432	23.5	12.7793
VSS2	1004	VSS2_78.FIN2																	1426	24	1.26227	Core
VSS2	1004	VSS2_127.FIN2																	1898	24.5	31.4015
VSS2	1004	VSS2_108.FIN2																	2027	24.5	15.2935
VSS2	1004	VSS2_90.FIN2																	1138	25	8.6116
VSS2	1004	VSS2_35.FIN2																	1171	25.5	10.2477
VSS2	1004	VSS2_63.FIN2																	1846	25.5	9.04659
VSS2	1004	VSS2_54.FIN2																	2701	25.5	6.25694
VSS2	1004	VSS2_107.FIN2																	1039	26	2.59865
VSS2	1004	VSS2_27.FIN2																	1087	26	3.67985
VSS2	1004	VSS2_38.FIN2																	1272	26.5	15.7233
VSS2	1004	VSS2_94.FIN2																	1474	26.5	11.4654
VSS2	1004	VSS2_45.FIN2																	1212	27	5.52805
VSS2	1004	VSS2_86.FIN2																	2086	27	0.431448
VSS2	1004	VSS2_112.FIN2																	980	27.5	0.510204
VSS2	1004	VSS2_88.FIN2																	1627	31	6.33067
VSS2	1004	VSS2_122.FIN2																	1970	33	2.58883
VSS2	1004	VSS2_25.FIN2																	1238	36.5	3.958
VSS2	1004	VSS2_102.FIN2																	1146	37.5	25.7417	Core
VSS2	1004	VSS2_21.FIN2																	1019	38	6.86948
VSS2	1004	VSS2_113.FIN2																	1083	39	0.646353	Core
VSS2	1004	VSS2_78.FIN2																	999	42	13.5135	Rim
VSS2	1004	VSS2_57.FIN2																	1092	42	1.28205	Core
VSS2	1004	VSS2_113.FIN2																	1205	44.5	28.3817	Rim
VSS3	1005	VSS3_132.FIN2																	364.2	1.7	1.16689
VSS3	1005	VSS3_56.FIN2																	347.1	1.75	1.69938
VSS3	1005	VSS3_6.FIN2																	337.3	1.85	0.297354
VSS3	1005	VSS3_115.FIN2																	441.1	2.05	3.62683
VSS3	1005	VSS3_75.FIN2																	316.2	2.15	2.49769
VSS3	1005	VSS3_107.FIN2																	434.8	2.3	0.480659
VSS3	1005	VSS3_85.FIN2																	425	2.5	0.211317
VSS3	1005	VSS3_90.FIN2																	415	2.55	1.04912
VSS3	1005	VSS3_128.FIN2																	296	2.65	28.3293
VSS3	1005	VSS3_31.FIN2																	408.8	2.65	0
VSS3	1005	VSS3_30.FIN2																	326.9	2.8	1.05932
VSS3	1005	VSS3_109.FIN2																	441.8	2.95	1.71301
VSS3	1005	VSS3_70.FIN2																	472.4	3.05	0.361164
VSS3	1005	VSS3_131.FIN2																	402.9	3.1	1.12883
VSS3	1005	VSS3_68.FIN2																	444.3	3.15	0.403497
VSS3	1005	VSS3_96.FIN2																	371	3.45	0.84262
VSS3	1005	VSS3_88.FIN2																	608.8	3.45	0.694674
VSS3	1005	VSS3_77.FIN2																	413.6	3.5	0.266667
VSS3	1005	VSS3_55.FIN2																	369.9	3.75	13.7963
VSS3	1005	VSS3_104.FIN2																	436.6	3.8	0.460193
VSS3	1005	VSS3_122.FIN2																	408.9	3.85	9.97358
VSS3	1005	VSS3_97.FIN2																	410.4	3.95	3.48071
VSS3	1005	VSS3_45.FIN2																	335.1	4	1.36116
VSS3	1005	VSS3_92.FIN2																	314.8	4.2	1.22186
VSS3	1005	VSS3_84.FIN2																	602.4	4.2	0.87073
VSS3	1005	VSS3_82.FIN2																	620.7	4.25	0.436893
VSS3	1005	VSS3_50.FIN2																	353.5	4.3	18.1334
VSS3	1005	VSS3_133.FIN2																	586.7	4.3	0.424304
VSS3	1005	VSS3_121.FIN2																	635.7	4.35	0.585443
VSS3	1005	VSS3_110.FIN2																	603.6	4.4	2.21934
VSS3	1005	VSS3_126.FIN2																	463.8	4.45	1.04575	Rim
VSS3	1005	VSS3_124.FIN2																	465.4	4.65	0.767591
VSS3	1005	VSS3_103.FIN2																	322.7	4.7	2.97655
VSS3	1005	VSS3_11.FIN2																	446.5	4.85	0.777778
VSS3	1005	VSS3_51.FIN2																	649.8	4.85	1.39605
VSS3	1005	VSS3_91.FIN2																	322	5	3.59281	Core
VSS3	1005	VSS3_25.FIN2																	424	5	1.62413
VSS3	1005	VSS3_71.FIN2																	480	5	20.5298
VSS3	1005	VSS3_79.FIN2																	531	5	1.84843
VSS3	1005	VSS3_62.FIN2																	637	5	0.933126
VSS3	1005	VSS3_58.FIN2																	440	5.5	7.23171
VSS3	1005	VSS3_72.FIN2																	447	5.5	1.10619
VSS3	1005	VSS3_9.FIN2																	456	5.5	1.72414
VSS3	1005	VSS3_65.FIN2																	575	5.5	2.54237
VSS3	1005	VSS3_36.FIN2																	416	6	10.9208
VSS3	1005	VSS3_43.FIN2																	606	6	0.831947
VSS3	1005	VSS3_130.FIN2																	1931	6	2.27861
VSS3	1005	VSS3_38.FIN2																	518	6.5	10.3806
VSS3	1005	VSS3_76.FIN2																	610	6.5	3.21489
VSS3	1005	VSS3_28.FIN2																	616	6.5	0.805153
VSS3	1005	VSS3_61.FIN2																	653	6.5	1.65663
VSS3	1005	VSS3_91.FIN2																	308	7	0.323625	Rim
VSS3	1005	VSS3_7.FIN2																	312	7	3.10559
VSS3	1005	VSS3_126.FIN2																	604	7	9.44528	Core
VSS3	1005	VSS3_98.FIN2																	613	7	0.325203
VSS3	1005	VSS3_14.FIN2																	623	7	1.73502
VSS3	1005	VSS3_33.FIN2																	678	7	2.58621
VSS3	1005	VSS3_137.FIN2																	466	7.5	25.5591
VSS3	1005	VSS3_26.FIN2																	594	7.5	0.168067
VSS3	1005	VSS3_118.FIN2																	797	7.5	14.7594
VSS3	1005	VSS3_21.FIN2																	566	8	1.73611
VSS3	1005	VSS3_112.FIN2																	1840	8	6.52174
VSS3	1005	VSS3_129.FIN2																	1875	8	21.76
VSS3	1005	VSS3_99.FIN2																	588	8.5	0.512821
VSS3	1005	VSS3_101.FIN2																	499	9.5	6.37899
VSS3	1005	VSS3_108.FIN2																	661	9.5	0.151515
VSS3	1005	VSS3_37.FIN2																	437	10.5	0.923788	Rim
VSS3	1005	VSS3_20.FIN2																	637	11	2.45023
VSS3	1005	VSS3_87.FIN2																	667	11	20.9716	Rim
VSS3	1005	VSS3_44.FIN2																	1244	11	5.78778
VSS3	1005	VSS3_64.FIN2																	1177	11.5	0.934579
VSS3	1005	VSS3_10.FIN2																	1500	11.5	0.933333
VSS3	1005	VSS3_135.FIN2																	1700	12	3.35294
VSS3	1005	VSS3_73.FIN2																	1193	12.5	2.84996
VSS3	1005	VSS3_134.FIN2																	1385	12.5	0.288809
VSS3	1005	VSS3_136.FIN2																	1673	12.5	17.1548
VSS3	1005	VSS3_117.FIN2																	1157	13	1.55575
VSS3	1005	VSS3_125.FIN2																	1380	13	0.869565
VSS3	1005	VSS3_60.FIN2																	2022	13	1.78042
VSS3	1005	VSS3_86.FIN2																	996	14	2.10843
VSS3	1005	VSS3_123.FIN2																	1028	14	8.26848
VSS3	1005	VSS3_120.FIN2																	1199	14	3.16931
VSS3	1005	VSS3_23.FIN2																	2666	14	7.27682
VSS3	1005	VSS3_35.FIN2																	3251	14	13.9342
VSS3	1005	VSS3_87.FIN2																	754	14.5	15.5655	Core
VSS3	1005	VSS3_106.FIN2																	1096	14.5	0.364964
VSS3	1005	VSS3_80.FIN2																	1110	14.5	4.32432
VSS3	1005	VSS3_24.FIN2																	1213	14.5	11.1294
VSS3	1005	VSS3_67.FIN2																	1341	14.5	2.75913
VSS3	1005	VSS3_46.FIN2																	1832	14.5	3.32969
VSS3	1005	VSS3_114.FIN2																	1674	15	4.12186
VSS3	1005	VSS3_63.FIN2																	1070	15.5	6.72897
VSS3	1005	VSS3_4.FIN2																	1342	15.5	28.6885
VSS3	1005	VSS3_94.FIN2																	790	16	20.7623
VSS3	1005	VSS3_3.FIN2																	945	16	4.65608
VSS3	1005	VSS3_127.FIN2																	1081	16	1.3876
VSS3	1005	VSS3_102.FIN2																	1422	16	1.12518
VSS3	1005	VSS3_66.FIN2																	2842	16.5	3.41309
VSS3	1005	VSS3_100.FIN2																	1343	17	0.372301
VSS3	1005	VSS3_18.FIN2																	1136	17.5	0.616197
VSS3	1005	VSS3_48.FIN2																	1362	17.5	23.6417	Core
VSS3	1005	VSS3_47.FIN2																	1671	17.5	2.693
VSS3	1005	VSS3_34.FIN2																	1225	18	13.2245
VSS3	1005	VSS3_59.FIN2																	1478	18	0.947226
VSS3	1005	VSS3_39.FIN2																	1672	18	0.717703
VSS3	1005	VSS3_17.FIN2																	1005	18.5	4.77612
VSS3	1005	VSS3_41.FIN2																	1014	18.5	4.04339
VSS3	1005	VSS3_42.FIN2																	1939	18.5	39.8659
VSS3	1005	VSS3_95.FIN2																	1946	18.5	4.77903
VSS3	1005	VSS3_19.FIN2																	1056	19	3.50379
VSS3	1005	VSS3_89.FIN2																	1099	19	0.272975
VSS3	1005	VSS3_83.FIN2																	1629	19	12.7072
VSS3	1005	VSS3_81.FIN2																	1175	19.5	2.12766
VSS3	1005	VSS3_119.FIN2																	1270	19.5	0.0787402
VSS3	1005	VSS3_113.FIN2																	1774	19.5	34.0474
VSS3	1005	VSS3_138.FIN2																	1790	19.5	1.22905
VSS3	1005	VSS3_13.FIN2																	1095	20	5.57078
VSS3	1005	VSS3_5.FIN2																	1286	20	0.466563
VSS3	1005	VSS3_78.FIN2																	1294	20	4.32767
VSS3	1005	VSS3_29.FIN2																	2956	20	49.797
VSS3	1005	VSS3_54.FIN2																	1140	20.5	13.1579
VSS3	1005	VSS3_116.FIN2																	1505	21	3.05648
VSS3	1005	VSS3_2.FIN2																	1633	21	1.46969
VSS3	1005	VSS3_48.FIN2																	644	21.5	23.9669	Rim
VSS3	1005	VSS3_16.FIN2																	1004	21.5	0.59761
VSS3	1005	VSS3_52.FIN2																	1210	22	20.7438
VSS3	1005	VSS3_69.FIN2																	2129	23.5	3.47581
VSS3	1005	VSS3_140.FIN2																	1404	24	12.6068
VSS3	1005	VSS3_49.FIN2																	1041	24.5	0.67243
VSS3	1005	VSS3_74.FIN2																	1089	24.5	19.0083
VSS3	1005	VSS3_53.FIN2																	1710	25	2.22222
VSS3	1005	VSS3_8.FIN2																	1683	25.5	45.9893
VSS3	1005	VSS3_22.FIN2																	1002	26.5	14.0719
VSS3	1005	VSS3_40.FIN2																	1418	26.5	4.72496	Core
VSS3	1005	VSS3_111.FIN2																	1028	27	15.4669
VSS3	1005	VSS3_1.FIN2																	993	27.5	2.51762
VSS3	1005	VSS3_32.FIN2																	1116	29	0.537634
VSS3	1005	VSS3_105.FIN2																	1115	30.5	7.26457
VSS3	1005	VSS3_139.FIN2																	862	32	0.464037
VSS3	1005	VSS3_37.FIN2																	1578	34.5	0.443599	Core
VSS3	1005	VSS3_87.FIN2																	1156	38	21.7993	Core
VSS3	1005	VSS3_40.FIN2																	1200	50	22.25	Rim
VSS4	1006	VSS4_23.FIN2																	369	1.35	1.17836
VSS4	1006	VSS4_41.FIN2																	381.2	1.5	0.210305
VSS4	1006	VSS4_105.FIN2																	417.1	1.6	0.453461
VSS4	1006	VSS4_108.FIN2																	331.1	1.65	1.45833
VSS4	1006	VSS4_116.FIN2																	403.4	1.7	1.12745
VSS4	1006	VSS4_64.FIN2																	329.7	1.9	2.39787
VSS4	1006	VSS4_115.FIN2																	658.5	1.9	0.935009
VSS4	1006	VSS4_18.FIN2																	387.3	1.95	0.232919
VSS4	1006	VSS4_133.FIN2																	424.1	1.95	0.736342
VSS4	1006	VSS4_121.FIN2																	441	1.95	0.570125
VSS4	1006	VSS4_28.FIN2																	454	1.95	2.47046
VSS4	1006	VSS4_118.FIN2																	507	1.95	0.118483
VSS4	1006	VSS4_49.FIN2																	402.7	2	4.18749
VSS4	1006	VSS4_25.FIN2																	410.3	2.1	3.18546
VSS4	1006	VSS4_6.FIN2																	399.5	2.15	0.604382
VSS4	1006	VSS4_24.FIN2																	466.6	2.15	0.786732
VSS4	1006	VSS4_37.FIN2																	428.1	2.25	0
VSS4	1006	VSS4_134.FIN2																	299.3	2.3	0.333
VSS4	1006	VSS4_42.FIN2																	355	2.35	1.0039
VSS4	1006	VSS4_46.FIN2																	403.7	2.45	1.46449
VSS4	1006	VSS4_106.FIN2																	579.7	2.45	1.02442
VSS4	1006	VSS4_52.FIN2																	694.5	2.5	0.944767
VSS4	1006	VSS4_72.FIN2																	312.4	2.55	2.98137
VSS4	1006	VSS4_5.FIN2																	338.4	2.65	5.79065
VSS4	1006	VSS4_100.FIN2																	572.9	2.65	1.04056
VSS4	1006	VSS4_113.FIN2																	589.9	2.65	2.18869
VSS4	1006	VSS4_30.FIN2																	484.6	2.7	1.38075
VSS4	1006	VSS4_33.FIN2																	469.7	2.75	0.213356
VSS4	1006	VSS4_79.FIN2																	505.9	2.75	0.374163
VSS4	1006	VSS4_76.FIN2																	513.2	2.75	0.446169
VSS4	1006	VSS4_21.FIN2																	602.4	2.8	0.594059
VSS4	1006	VSS4_68.FIN2																	655.1	2.85	0.182843
VSS4	1006	VSS4_111.FIN2																	296.3	2.9	2.14663	Rim
VSS4	1006	VSS4_34.FIN2																	362.5	2.9	0.739321
VSS4	1006	VSS4_131.FIN2																	406.8	2.9	0.320592
VSS4	1006	VSS4_44.FIN2																	587.1	2.95	3.72253
VSS4	1006	VSS4_4.FIN2																	572.5	3	1.83471
VSS4	1006	VSS4_12.FIN2																	385.9	3.1	5.13766	Core
VSS4	1006	VSS4_31.FIN2																	622.1	3.1	0.66343
VSS4	1006	VSS4_67.FIN2																	556.8	3.15	2.84418
VSS4	1006	VSS4_19.FIN2																	690.6	3.15	0.773384
VSS4	1006	VSS4_2.FIN2																	489.2	3.2	0.609508
VSS4	1006	VSS4_70.FIN2																	627.2	3.2	0.46452
VSS4	1006	VSS4_119.FIN2																	330.7	3.3	0.988024	Rim
VSS4	1006	VSS4_139.FIN2																	624.8	3.3	1.49448
VSS4	1006	VSS4_35.FIN2																	646.4	3.3	0.232594
VSS4	1006	VSS4_125.FIN2																	319.6	3.35	1.05263
VSS4	1006	VSS4_12.FIN2																	395.1	3.35	3.16176	Rim
VSS4	1006	VSS4_95.FIN2																	553.9	3.4	1.33595
VSS4	1006	VSS4_80.FIN2																	614.3	3.4	0.820614
VSS4	1006	VSS4_69.FIN2																	424.3	3.5	1.32558
VSS4	1006	VSS4_58.FIN2																	425.9	3.5	0.953488
VSS4	1006	VSS4_104.FIN2																	502.1	3.6	8.20841
VSS4	1006	VSS4_78.FIN2																	336.9	3.8	3.74286
VSS4	1006	VSS4_82.FIN2																	423.3	3.85	0.866511
VSS4	1006	VSS4_126.FIN2																	575.4	3.85	0.104167
VSS4	1006	VSS4_60.FIN2																	623.7	3.85	2.10328
VSS4	1006	VSS4_43.FIN2																	643.8	3.95	2.09324
VSS4	1006	VSS4_129.FIN2																	568.3	4.1	0.941385
VSS4	1006	VSS4_32.FIN2																	577.6	4.1	0.0866401	Rim
VSS4	1006	VSS4_59.FIN2																	432.4	4.2	10.8454
VSS4	1006	VSS4_103.FIN2																	584.8	4.4	3.81579
VSS4	1006	VSS4_119.FIN2																	365.7	4.7	0.467033	Core
VSS4	1006	VSS4_130.FIN2																	602.4	4.75	8.3105	Core
VSS4	1006	VSS4_130.FIN2																	387	5.5	0.257732	Rim
VSS4	1006	VSS4_14.FIN2																	444	5.5	12.9412
VSS4	1006	VSS4_122.FIN2																	614	5.5	5.97243
VSS4	1006	VSS4_74.FIN2																	774	7.5	2.64151
VSS4	1006	VSS4_99.FIN2																	2716	7.5	0.699558
VSS4	1006	VSS4_140.FIN2																	1613	8	1.42591
VSS4	1006	VSS4_101.FIN2																	1719	8	0.814427
VSS4	1006	VSS4_124.FIN2																	1962	8	0.917431
VSS4	1006	VSS4_15.FIN2																	736	8.5	1.34048	Rim
VSS4	1006	VSS4_71.FIN2																	1685	8.5	7.65579
VSS4	1006	VSS4_10.FIN2																	1810	8.5	0.552486
VSS4	1006	VSS4_86.FIN2																	2739	8.5	3.94304
VSS4	1006	VSS4_96.FIN2																	533	9	9.04437	Rim
VSS4	1006	VSS4_107.FIN2																	778	9	9.10153	Rim
VSS4	1006	VSS4_61.FIN2																	1406	9	0.355619
VSS4	1006	VSS4_112.FIN2																	1992	9	1.20482
VSS4	1006	VSS4_17.FIN2																	1499	9.5	1.13409
VSS4	1006	VSS4_38.FIN2																	1535	9.5	9.64169
VSS4	1006	VSS4_114.FIN2																	1726	9.5	0.463499
VSS4	1006	VSS4_16.FIN2																	1146	10	12.0942	Rim
VSS4	1006	VSS4_20.FIN2																	1188	10	1.6835
VSS4	1006	VSS4_62.FIN2																	1379	10	33.285
VSS4	1006	VSS4_53.FIN2																	1100	10.5	0.890909
VSS4	1006	VSS4_135.FIN2																	1204	10.5	0.249169
VSS4	1006	VSS4_55.FIN2																	1261	10.5	2.93418
VSS4	1006	VSS4_51.FIN2																	1019	11	1.87439
VSS4	1006	VSS4_138.FIN2																	1068	11	6.27341
VSS4	1006	VSS4_77.FIN2																	1255	11	1.83267
VSS4	1006	VSS4_48.FIN2																	1400	11	1.21429
VSS4	1006	VSS4_142.FIN2																	1807	11	3.92916
VSS4	1006	VSS4_50.FIN2																	1037	11.5	0.0192864
VSS4	1006	VSS4_87.FIN2																	1236	11.5	11.6505
VSS4	1006	VSS4_81.FIN2																	1426	11.5	1.75316
VSS4	1006	VSS4_127.FIN2																	1204	12	13.7708
VSS4	1006	VSS4_57.FIN2																	1337	12	0.822737
VSS4	1006	VSS4_141.FIN2																	1377	12	1.45243
VSS4	1006	VSS4_136.FIN2																	1398	12	3.79113
VSS4	1006	VSS4_102.FIN2																	1524	12	1.24672
VSS4	1006	VSS4_40.FIN2																	2010	12	2.78607
VSS4	1006	VSS4_9.FIN2																	1383	12.5	2.74765	Core
VSS4	1006	VSS4_27.FIN2																	1401	12.5	2.56959	Core
VSS4	1006	VSS4_83.FIN2																	1880	12.5	0.585106
VSS4	1006	VSS4_132.FIN2																	1068	13	9.26966	Core
VSS4	1006	VSS4_15.FIN2																	1161	13	2.49785	Core
VSS4	1006	VSS4_143.FIN2																	1289	13	4.73235
VSS4	1006	VSS4_123.FIN2																	1652	13	1.15012
VSS4	1006	VSS4_29.FIN2																	1191	13.5	0.352645
VSS4	1006	VSS4_54.FIN2																	1314	13.5	2.35921
VSS4	1006	VSS4_128.FIN2																	1494	13.5	0.334672
VSS4	1006	VSS4_85.FIN2																	1623	14	42.9452
VSS4	1006	VSS4_8.FIN2																	1233	14.5	1.78427
VSS4	1006	VSS4_75.FIN2																	1048	15	1.44084
VSS4	1006	VSS4_16.FIN2																	1185	15	5.06329	Core
VSS4	1006	VSS4_32.FIN2																	1589	15	30.3965	Core
VSS4	1006	VSS4_36.FIN2																	1050	15.5	2.55238
VSS4	1006	VSS4_56.FIN2																	1192	15.5	1.42617
VSS4	1006	VSS4_91.FIN2																	1019	16	3.53288
VSS4	1006	VSS4_88.FIN2																	1058	16	0.113422
VSS4	1006	VSS4_47.FIN2																	1641	16.5	2.55941	Core
VSS4	1006	VSS4_63.FIN2																	1025	17	1.2878
VSS4	1006	VSS4_107.FIN2																	1056	17	7.00758	Core
VSS4	1006	VSS4_73.FIN2																	1544	17	0.129534
VSS4	1006	VSS4_65.FIN2																	998	17.5	1.30261
VSS4	1006	VSS4_98.FIN2																	1686	17.5	5.87189
VSS4	1006	VSS4_39.FIN2																	1430	18	3.14685
VSS4	1006	VSS4_89.FIN2																	1438	18.5	8.34492
VSS4	1006	VSS4_45.FIN2																	1013	19	3.01086
VSS4	1006	VSS4_117.FIN2																	1027	19	0.097371	Rim
VSS4	1006	VSS4_117.FIN2																	1137	19	8.70712	Core
VSS4	1006	VSS4_109.FIN2																	841	19.5	4.43182
VSS4	1006	VSS4_96.FIN2																	1042	21	0.575816	Core
VSS4	1006	VSS4_22.FIN2																	1136	21	12.3239
VSS4	1006	VSS4_90.FIN2																	1002	22	0.399202
VSS4	1006	VSS4_92.FIN2																	1060	22	0.849057
VSS4	1006	VSS4_93.FIN2																	1129	22.5	0.620018
VSS4	1006	VSS4_27.FIN2																	1057	24.5	7.47398	Rim
VSS4	1006	VSS4_9.FIN2																	1144	24.5	4.02098	Rim
VSS4	1006	VSS4_66.FIN2																	1158	24.5	9.41278
VSS4	1006	VSS4_7.FIN2																	1285	24.5	1.71206
VSS4	1006	VSS4_94.FIN2																	1019	25	6.96762
VSS4	1006	VSS4_26.FIN2																	1269	25	4.49173
VSS4	1006	VSS4_3.FIN2																	1051	27.5	0.856327
VSS4	1006	VSS4_120.FIN2																	1045	31	1.33971
VSS4	1006	VSS4_137.FIN2																	1042	33	3.35893
VSS4	1006	VSS4_47.FIN2																	921	36.5	4.56026	Rim
VSS4	1006	VSS4_84.FIN2																	983	43.5	4.98474
VSS4	1006	VSS4_97.FIN2																	1122	44.5	20.2317
ALSS1	1007	ALSS1_111.FIN2																	394.7	2.1	1.44819
ALSS1	1007	ALSS1_33.FIN2																	409.8	2.45	0.0732601
ALSS1	1007	ALSS1_34.FIN2																	417.1	2.5	2.45557
ALSS1	1007	ALSS1_114.FIN2																	343.2	2.75	2.6009
ALSS1	1007	ALSS1_31.FIN2																	602.7	2.8	0.363696
ALSS1	1007	ALSS1_49.FIN2																	356.1	2.95	5.41833
ALSS1	1007	ALSS1_84.FIN2																	616.7	3.1	0.194206
ALSS1	1007	ALSS1_69.FIN2																	329.4	3.15	15.5385
ALSS1	1007	ALSS1_27.FIN2																	439.6	3.25	5.34022
ALSS1	1007	ALSS1_17.FIN2																	608.8	3.5	1.63193
ALSS1	1007	ALSS1_115.FIN2																	351.5	3.55	9.33712
ALSS1	1007	ALSS1_136.FIN2																	392.7	3.55	4.0557
ALSS1	1007	ALSS1_116.FIN2																	341	3.7	8.65256
ALSS1	1007	ALSS1_74.FIN2																	415.7	3.75	11.928
ALSS1	1007	ALSS1_93.FIN2																	606.3	3.85	1.4627
ALSS1	1007	ALSS1_39.FIN2																	264.4	3.9	18.3447
ALSS1	1007	ALSS1_63.FIN2																	629.1	3.95	1.53325
ALSS1	1007	ALSS1_1.FIN2																	601.5	4	2.65415
ALSS1	1007	ALSS1_118.FIN2																	523.5	4.05	3.05556
ALSS1	1007	ALSS1_112.FIN2																	339.4	4.3	1.1936
ALSS1	1007	ALSS1_137.FIN2																	435.3	4.35	5.28721
ALSS1	1007	ALSS1_66.FIN2																	559.2	4.35	0.394973
ALSS1	1007	ALSS1_134.FIN2																	427.7	4.4	3.88764
ALSS1	1007	ALSS1_108.FIN2																	601.3	4.4	1.10197
ALSS1	1007	ALSS1_22.FIN2																	383.3	4.45	2.21333	Core
ALSS1	1007	ALSS1_19.FIN2																	358.3	4.6	0.901155
ALSS1	1007	ALSS1_135.FIN2																	436.1	4.6	0.0229358	Core
ALSS1	1007	ALSS1_40.FIN2																	578.6	4.6	4.47416
ALSS1	1007	ALSS1_100.FIN2																	424.8	4.75	0.164512
ALSS1	1007	ALSS1_122.FIN2																	590.8	4.85	2.98851
ALSS1	1007	ALSS1_32.FIN2																	287	5	0.701754
ALSS1	1007	ALSS1_99.FIN2																	347	5	16.5865
ALSS1	1007	ALSS1_21.FIN2																	598	5	0	Core
ALSS1	1007	ALSS1_23.FIN2																	370	5.5	14.1531
ALSS1	1007	ALSS1_119.FIN2																	594	5.5	1.04948
ALSS1	1007	ALSS1_4.FIN2																	673	5.5	23.0769
ALSS1	1007	ALSS1_46.FIN2																	400	6	1.26582
ALSS1	1007	ALSS1_52.FIN2																	1922	6	0.156087
ALSS1	1007	ALSS1_2.FIN2																	271	6.5	9.0604
ALSS1	1007	ALSS1_28.FIN2																	323	6.5	2.21519
ALSS1	1007	ALSS1_135.FIN2																	351	6.5	4.35967	Rim
ALSS1	1007	ALSS1_78.FIN2																	370	6.5	3.14136
ALSS1	1007	ALSS1_5.FIN2																	401	6.5	26.0148
ALSS1	1007	ALSS1_57.FIN2																	423	6.5	0.236967	Core
ALSS1	1007	ALSS1_131.FIN2																	593	6.5	2.5242
ALSS1	1007	ALSS1_124.FIN2																	600	6.5	3.06947
ALSS1	1007	ALSS1_60.FIN2																	653	6.5	0.153374
ALSS1	1007	ALSS1_38.FIN2																	717	6.5	13.0909
ALSS1	1007	ALSS1_120.FIN2																	287	7	7.71704
ALSS1	1007	ALSS1_22.FIN2																	342	7	2.00573	Rim
ALSS1	1007	ALSS1_71.FIN2																	408	7	1.44928
ALSS1	1007	ALSS1_125.FIN2																	500	7	13.1944
ALSS1	1007	ALSS1_110.FIN2																	641	7	8.42857
ALSS1	1007	ALSS1_76.FIN2																	492	7.5	1.65289
ALSS1	1007	ALSS1_47.FIN2																	2652	7.5	5.24133
ALSS1	1007	ALSS1_12.FIN2																	411	8	0.488998
ALSS1	1007	ALSS1_101.FIN2																	439	8	8.35073
ALSS1	1007	ALSS1_16.FIN2																	475	8	1.45228
ALSS1	1007	ALSS1_59.FIN2																	641	8	8.42857	Core
ALSS1	1007	ALSS1_103.FIN2																	754	8	12.2235
ALSS1	1007	ALSS1_70.FIN2																	1760	8	19.7727
ALSS1	1007	ALSS1_50.FIN2																	343	8.5	8.7766	Rim
ALSS1	1007	ALSS1_98.FIN2																	634	8.5	0.782473
ALSS1	1007	ALSS1_94.FIN2																	435	9	20.9091
ALSS1	1007	ALSS1_21.FIN2																	453	9	4.22833	Rim
ALSS1	1007	ALSS1_68.FIN2																	480	9.5	10.1124
ALSS1	1007	ALSS1_65.FIN2																	524	9.5	5.9246
ALSS1	1007	ALSS1_75.FIN2																	400	10	0.744417
ALSS1	1007	ALSS1_22.FIN2																	513	10	0.391389	Core
ALSS1	1007	ALSS1_53.FIN2																	1606	10	2.61519
ALSS1	1007	ALSS1_59.FIN2																	411	10.5	0.242718	Rim
ALSS1	1007	ALSS1_107.FIN2																	638	10.5	2.59542
ALSS1	1007	ALSS1_72.FIN2																	649	10.5	2.69865
ALSS1	1007	ALSS1_30.FIN2																	652	10.5	0.761035
ALSS1	1007	ALSS1_73.FIN2																	833	10.5	9.65293
ALSS1	1007	ALSS1_89.FIN2																	593	11	3.73377
ALSS1	1007	ALSS1_67.FIN2																	1328	11	2.71084
ALSS1	1007	ALSS1_79.FIN2																	1509	11	4.97018
ALSS1	1007	ALSS1_85.FIN2																	1649	11	0.242571
ALSS1	1007	ALSS1_87.FIN2																	2588	11	6.64606
ALSS1	1007	ALSS1_57.FIN2																	301	11.5	10.9467	Rim
ALSS1	1007	ALSS1_117.FIN2																	341	11.5	15.5941	Rim
ALSS1	1007	ALSS1_91.FIN2																	508	11.5	9.60854
ALSS1	1007	ALSS1_138.FIN2																	751	11.5	10.8076
ALSS1	1007	ALSS1_54.FIN2																	1144	11.5	0.437063
ALSS1	1007	ALSS1_126.FIN2																	465	12.5	0.214592
ALSS1	1007	ALSS1_82.FIN2																	584	12.5	21.2938
ALSS1	1007	ALSS1_51.FIN2																	1027	12.5	0.584226
ALSS1	1007	ALSS1_15.FIN2																	1435	12.5	7.31707
ALSS1	1007	ALSS1_117.FIN2																	542	13	4.40917	Core
ALSS1	1007	ALSS1_43.FIN2																	561	13	3.27586
ALSS1	1007	ALSS1_50.FIN2																	833	13	15.1731	Core
ALSS1	1007	ALSS1_56.FIN2																	1689	13	12.4334
ALSS1	1007	ALSS1_37.FIN2																	674	14	11.1989
ALSS1	1007	ALSS1_96.FIN2																	829	14	9.20044
ALSS1	1007	ALSS1_109.FIN2																	1025	14	7.12195
ALSS1	1007	ALSS1_133.FIN2																	1266	14	1.4218
ALSS1	1007	ALSS1_9.FIN2																	1437	14	12.2477
ALSS1	1007	ALSS1_77.FIN2																	1623	14	2.64941
ALSS1	1007	ALSS1_90.FIN2																	1724	14	16.4733
ALSS1	1007	ALSS1_35.FIN2																	2079	14.5	11.3035	Core
ALSS1	1007	ALSS1_121.FIN2																	834	15	5.11945
ALSS1	1007	ALSS1_55.FIN2																	1066	15.5	16.6041	Core
ALSS1	1007	ALSS1_61.FIN2																	1068	15.5	0.187266
ALSS1	1007	ALSS1_45.FIN2																	1663	15.5	5.47204
ALSS1	1007	ALSS1_105.FIN2																	1607	16	0.995644
ALSS1	1007	ALSS1_48.FIN2																	2306	16	19.5143
ALSS1	1007	ALSS1_14.FIN2																	2613	16	21.0486
ALSS1	1007	ALSS1_10.FIN2																	410	17	8.2774	Rim
ALSS1	1007	ALSS1_129.FIN2																	943	17	5.09014
ALSS1	1007	ALSS1_127.FIN2																	674	17.5	0.736377
ALSS1	1007	ALSS1_80.FIN2																	1785	17.5	7.22689
ALSS1	1007	ALSS1_64.FIN2																	670	18	18.1929	Rim
ALSS1	1007	ALSS1_128.FIN2																	666	18.5	14.6154	Rim
ALSS1	1007	ALSS1_62.FIN2																	1088	18.5	5.60662
ALSS1	1007	ALSS1_24.FIN2																	1691	18.5	4.31697
ALSS1	1007	ALSS1_41.FIN2																	1362	19	11.4537
ALSS1	1007	ALSS1_10.FIN2																	1694	19	19.9528	Core
ALSS1	1007	ALSS1_13.FIN2																	2636	19	19.3475
ALSS1	1007	ALSS1_97.FIN2																	1284	20	1.86916
ALSS1	1007	ALSS1_6.FIN2																	1285	20	5.68093
ALSS1	1007	ALSS1_92.FIN2																	1166	20.5	5.23156
ALSS1	1007	ALSS1_8.FIN2																	1797	20.5	43.4057
ALSS1	1007	ALSS1_29.FIN2																	1940	21	1.39175
ALSS1	1007	ALSS1_64.FIN2																	1035	21.5	4.7343	Core
ALSS1	1007	ALSS1_81.FIN2																	1286	21.5	13.5303
ALSS1	1007	ALSS1_44.FIN2																	1654	21.5	8.82709
ALSS1	1007	ALSS1_3.FIN2																	2189	21.5	9.36501
ALSS1	1007	ALSS1_102.FIN2																	1917	22.5	47.8873
ALSS1	1007	ALSS1_104.FIN2																	1191	24	2.60285
ALSS1	1007	ALSS1_86.FIN2																	1938	24	7.99794
ALSS1	1007	ALSS1_106.FIN2																	929	24.5	4.52099
ALSS1	1007	ALSS1_140.FIN2																	1179	28.5	1.01781
ALSS1	1007	ALSS1_36.FIN2																	1113	30.5	1.25786
ALSS1	1007	ALSS1_123.FIN2																	1977	30.5	4.50177
ALSS1	1007	ALSS1_50.FIN2																	1520	31.5	5.59211	Core
ALSS1	1007	ALSS1_139.FIN2																	968	32	2.99587
ALSS1	1007	ALSS1_11.FIN2																	1016	32.5	2.65748
ALSS1	1007	ALSS1_58.FIN2																	1092	32.5	13.5531
ALSS1	1007	ALSS1_20.FIN2																	1235	34.5	22.1862
ALSS1	1007	ALSS1_25.FIN2																	1800	42.5	0.555556
ALSS1	1007	ALSS1_35.FIN2																	1705	47	44.5748	Rim
ALSS1	1007	ALSS1_128.FIN2																	1420	60	21.9014	Core
TSS1	1100	TSS1_1.FIN2																	1034	8.5
TSS1	1100	TSS1_2.FIN2																	2754	11
TSS1	1100	TSS1_3.FIN2																	1803	6
TSS1	1100	TSS1_4.FIN2																	1434	7
TSS1	1100	TSS1_5.FIN2																	1038	10.5
TSS1	1100	TSS1_6.FIN2																	442.4	3.05
TSS1	1100	TSS1_7.FIN2																	1181	7
TSS1	1100	TSS1_8.FIN2																	1907	22.5
TSS1	1100	TSS1_9.FIN2																	1061	8
TSS1	1100	TSS1_10.FIN2																	1525	6.5
TSS1	1100	TSS1_11.FIN2																	1854	16
TSS1	1100	TSS1_11.FIN2																	2198	19.5
TSS1	1100	TSS1_12.FIN2																	1096	22
TSS1	1100	TSS1_13.FIN2																	426.6	3.3
TSS1	1100	TSS1_14.FIN2																	1037	9
TSS1	1100	TSS1_15.FIN2																	1459	7.5
TSS1	1100	TSS1_16.FIN2																	422.3	2.75
TSS1	1100	TSS1_17.FIN2																	1048	19.5
TSS1	1100	TSS1_18.FIN2																	1022	5
TSS1	1100	TSS1_20.FIN2																	1032	6.5
TSS1	1100	TSS1_21.FIN2																	1674	5.5
TSS1	1100	TSS1_22.FIN2																	1678	7
TSS1	1100	TSS1_23.FIN2																	1788	6.5
TSS1	1100	TSS1_24.FIN2																	1441	9.5
TSS1	1100	TSS1_25.FIN2																	1047	9.5
TSS1	1100	TSS1_27.FIN2																	409.3	4.4
TSS1	1100	TSS1_28.FIN2																	1316	7.5
TSS1	1100	TSS1_29.FIN2																	1622	5
TSS1	1100	TSS1_30.FIN2																	1680	6.5
TSS1	1100	TSS1_31.FIN2																	380	2.25
TSS1	1100	TSS1_32.FIN2																	1769.3	4.8
TSS1	1100	TSS1_33.FIN2																	1238	7
TSS1	1100	TSS1_34.FIN2																	1387	14
TSS1	1100	TSS1_35.FIN2																	1129	5.5
TSS1	1100	TSS1_36.FIN2																	1124	14
TSS1	1100	TSS1_37.FIN2																	2995.1	3
TSS1	1100	TSS1_38.FIN2																	973	14
TSS1	1100	TSS1_39.FIN2																	1080	8.5
TSS1	1100	TSS1_40.FIN2																	2017.9	4.8
TSS1	1100	TSS1_41.FIN2																	1696.2	4.55
TSS1	1100	TSS1_42.FIN2																	957	19
TSS1	1100	TSS1_43.FIN2																	1800.5	4.5
TSS1	1100	TSS1_44.FIN2																	1145	36
TSS1	1100	TSS1_45.FIN2																	1089.2	4.65
TSS1	1100	TSS1_46.FIN2																	1170	15.5
TSS1	1100	TSS1_47.FIN2																	1155	5.5
TSS1	1100	TSS1_48.FIN2																	1052	11
TSS1	1100	TSS1_49.FIN2																	1157	13.5
TSS1	1100	TSS1_51.FIN2																	1137	10.5
TSS1	1100	TSS1_52.FIN2																	1105	8.5
TSS1	1100	TSS1_53.FIN2																	474.5	2.6
TSS1	1100	TSS1_54.FIN2																	1806	5
TSS1	1100	TSS1_55.FIN2																	1911.4	4.45
TSS1	1100	TSS1_56.FIN2																	1082	9
TSS1	1100	TSS1_57.FIN2																	1062	13.5
TSS1	1100	TSS1_58.FIN2																	1027	6
TSS1	1100	TSS1_59.FIN2																	1643	8
TSS1	1100	TSS1_61.FIN2																	1639	10.5
TSS1	1100	TSS1_62.FIN2																	1329	16.5
TSS1	1100	TSS1_63.FIN2																	1046	5.5
TSS1	1100	TSS1_64.FIN2																	1629	6
TSS1	1100	TSS1_65.FIN2																	1083	12.5
TSS1	1100	TSS1_66.FIN2																	403.1	2.9
TSS1	1100	TSS1_67.FIN2																	1010	10.5
TSS1	1100	TSS1_68.FIN2																	399.2	2.1
TSS1	1100	TSS1_69.FIN2																	940	13.5
TSS1	1100	TSS1_70.FIN2																	420.1	2.15
TSS1	1100	TSS1_71.FIN2																	1862.7	4.9
TSS1	1100	TSS1_72.FIN2																	2550	8.5
TSS1	1100	TSS1_73.FIN2																	1008	13.5
TSS1	1100	TSS1_74.FIN2																	1000	12.5
TSS1	1100	TSS1_75.FIN2																	1363	12.5
TSS1	1100	TSS1_76.FIN2																	1653.4	4
TSS1	1100	TSS1_77.FIN2																	1074	8.5
TSS1	1100	TSS1_78.FIN2																	398.3	3.3
TSS1	1100	TSS1_79.FIN2																	1760.1	3.5
TSS1	1100	TSS1_80.FIN2																	1546	11.5
TSS1	1100	TSS1_81.FIN2																	1872.6	4.6
TSS1	1100	TSS1_82.FIN2																	954	13
TSS1	1100	TSS1_83.FIN2																	1020	12.5
TSS1	1100	TSS1_84.FIN2																	442	3.95
TSS1	1100	TSS1_85.FIN2																	1159	11.5
TSS1	1100	TSS1_86.FIN2																	1297	5
TSS1	1100	TSS1_87.FIN2																	1274	15.5
TSS1	1100	TSS1_88.FIN2																	2353	10.5
TSS1	1100	TSS1_88.FIN2																	2666	8.5
TSS1	1100	TSS1_89.FIN2																	1177	6.5
TSS1	1100	TSS1_90.FIN2																	1374	17
TSS1	1100	TSS1_91.FIN2																	1073	24
TSS1	1100	TSS1_92.FIN2																	932	20
TSS1	1100	TSS1_93.FIN2																	1341	5.5
TSS1	1100	TSS1_94.FIN2																	2747	6.5
TSS1	1100	TSS1_95.FIN2																	1080	6.5
TSS1	1100	TSS1_96.FIN2																	463.7	2.55
TSS1	1100	TSS1_97.FIN2																	1010	21
TSS1	1100	TSS1_98.FIN2																	425	5
TSS1	1100	TSS1_99.FIN2																	1030	9
TSS1	1100	TSS1_100.FIN2																	976	14.5
TSS1	1100	TSS1_101.FIN2																	1010.6	4.9
TSS1	1100	TSS1_103.FIN2																	1165	6
TSS1	1100	TSS1_105.FIN2																	1114	6.5
TSS1	1100	TSS1_106.FIN2																	1136	7.5
TSS1	1100	TSS1_108.FIN2																	1178	13
TSS1	1100	TSS1_109.FIN2																	1502	6
TSS1	1100	TSS1_110.FIN2																	1465	13
TSS1	1100	TSS1_111.FIN2																	1043	6
TSS1	1100	TSS1_112.FIN2																	1531	13.5
TSS1	1100	TSS1_113.FIN2																	2739.1	4.75
TSS1	1100	TSS1_114.FIN2																	491.8	4
TSS1	1100	TSS1_115.FIN2																	1057	9.5
TSS1	1100	TSS1_116.FIN2																	1768.7	3.65
TSS1	1100	TSS1_117.FIN2																	1090	9
TSS1	1100	TSS1_118.FIN2																	2736.1	4.1
TSS1	1100	TSS1_119.FIN2																	1653	5.5
TSS1	1100	TSS1_120.FIN2																	1172	7.5
TSS2	1101	TSS2_1.FIN2																	1265	9
TSS2	1101	TSS2_2.FIN2																	2616	6
TSS2	1101	TSS2_3.FIN2																	447	8
TSS2	1101	TSS2_4.FIN2																	1759.3	3.05
TSS2	1101	TSS2_5.FIN2																	3136.1	4.5
TSS2	1101	TSS2_6.FIN2																	1270	11.5
TSS2	1101	TSS2_8.FIN2																	439.4	3.5
TSS2	1101	TSS2_8.FIN2																	1268	6.5
TSS2	1101	TSS2_9.FIN2																	1024	7
TSS2	1101	TSS2_10.FIN2																	1162	11.5
TSS2	1101	TSS2_11.FIN2																	995	6.5
TSS2	1101	TSS2_12.FIN2																	1510	5.5
TSS2	1101	TSS2_13.FIN2																	2562.1	4.65
TSS2	1101	TSS2_14.FIN2																	1235	8.5
TSS2	1101	TSS2_15.FIN2																	1449	7.5
TSS2	1101	TSS2_16.FIN2																	420.9	3.25
TSS2	1101	TSS2_17.FIN2																	417.8	2.6
TSS2	1101	TSS2_18.FIN2																	1699	6.5
TSS2	1101	TSS2_19.FIN2																	1174	5.5
TSS2	1101	TSS2_20.FIN2																	1599	10.5
TSS2	1101	TSS2_21.FIN2																	1059	5
TSS2	1101	TSS2_22.FIN2																	1643	7
TSS2	1101	TSS2_23.FIN2																	1194	5
TSS2	1101	TSS2_24.FIN2																	1133	9
TSS2	1101	TSS2_25.FIN2																	1073	11
TSS2	1101	TSS2_26.FIN2																	588	2.85
TSS2	1101	TSS2_27.FIN2																	1125	9.5
TSS2	1101	TSS2_28.FIN2																	982	5.5
TSS2	1101	TSS2_29.FIN2																	1055	10
TSS2	1101	TSS2_30.FIN2																	1017	12
TSS2	1101	TSS2_31.FIN2																	1303	11
TSS2	1101	TSS2_32.FIN2																	1180	9.5
TSS2	1101	TSS2_33.FIN2																	987	13
TSS2	1101	TSS2_34.FIN2																	1032	8
TSS2	1101	TSS2_35.FIN2																	1224	10.5
TSS2	1101	TSS2_36.FIN2																	404.9	3.55
TSS2	1101	TSS2_37.FIN2																	1039	8.5
TSS2	1101	TSS2_38.FIN2																	1063	8
TSS2	1101	TSS2_39.FIN2																	1815.9	4.1
TSS2	1101	TSS2_41.FIN2																	1373	8.5
TSS2	1101	TSS2_42.FIN2																	1371	9.5
TSS2	1101	TSS2_43.FIN2																	1216	12.5
TSS2	1101	TSS2_44.FIN2																	1201	6
TSS2	1101	TSS2_45.FIN2																	1042	18
TSS2	1101	TSS2_46.FIN2																	404.1	2.2
TSS2	1101	TSS2_47.FIN2																	1099	22
TSS2	1101	TSS2_48.FIN2																	1020	5.5
TSS2	1101	TSS2_49.FIN2																	1373	7
TSS2	1101	TSS2_50.FIN2																	1066	11
TSS2	1101	TSS2_51.FIN2																	1033	19.5
TSS2	1101	TSS2_52.FIN2																	1634	5.5
TSS2	1101	TSS2_53.FIN2																	1789.1	3.9
TSS2	1101	TSS2_54.FIN2																	1818.7	4.85
TSS2	1101	TSS2_55.FIN2																	1007	7
TSS2	1101	TSS2_56.FIN2																	1407	7.5
TSS2	1101	TSS2_57.FIN2																	1091	13
TSS2	1101	TSS2_58.FIN2																	1143	7
TSS2	1101	TSS2_59.FIN2																	2703.7	4.55
TSS2	1101	TSS2_60.FIN2																	1107	18
TSS2	1101	TSS2_61.FIN2																	1150	7.5
TSS2	1101	TSS2_62.FIN2																	1518	6.5
TSS2	1101	TSS2_63.FIN2																	1606	15
TSS2	1101	TSS2_64.FIN2																	1079	8.5
TSS2	1101	TSS2_65.FIN2																	1022	7.5
TSS2	1101	TSS2_66.FIN2																	939	15
TSS2	1101	TSS2_67.FIN2																	1716	7
TSS2	1101	TSS2_68.FIN2																	412	4.1
TSS2	1101	TSS2_69.FIN2																	2462.1	4.1
TSS2	1101	TSS2_70.FIN2																	1400	5.5
TSS2	1101	TSS2_71.FIN2																	1146	10
TSS2	1101	TSS2_72.FIN2																	965	21.5
TSS2	1101	TSS2_73.FIN2																	1093	12
TSS2	1101	TSS2_74.FIN2																	1109	6
TSS2	1101	TSS2_76.FIN2																	3100.5	2.3
TSS2	1101	TSS2_78.FIN2																	461.5	3.95
TSS2	1101	TSS2_78.FIN2																	1528	12.5
TSS2	1101	TSS2_79.FIN2																	1037	5.5
TSS2	1101	TSS2_80.FIN2																	1718	8.5
TSS2	1101	TSS2_81.FIN2																	1108	6.5
TSS2	1101	TSS2_82.FIN2																	1102	11
TSS2	1101	TSS2_83.FIN2																	1100	16
TSS2	1101	TSS2_84.FIN2																	1002	6
TSS2	1101	TSS2_85.FIN2																	1009	8
TSS2	1101	TSS2_86.FIN2																	1172	6.5
TSS2	1101	TSS2_87.FIN2																	1040	6.5
TSS2	1101	TSS2_88.FIN2																	2668	4
TSS2	1101	TSS2_89.FIN2																	1367	8.5
TSS2	1101	TSS2_90.FIN2																	1612	10
TSS2	1101	TSS2_91.FIN2																	1049	8
TSS2	1101	TSS2_92.FIN2																	1066	7.5
TSS2	1101	TSS2_94.FIN2																	1017	7.5
TSS2	1101	TSS2_96.FIN2																	1167	10.5
TSS2	1101	TSS2_97.FIN2																	1790.1	4.6
TSS2	1101	TSS2_99.FIN2																	1688	5.5
TSS2	1101	TSS2_101.FIN2																	1512	7.5
TSS2	1101	TSS2_102.FIN2																	2576	10
TSS2	1101	TSS2_103.FIN2																	1153	13.5
TSS2	1101	TSS2_105.FIN2																	1184	10
TSS2	1101	TSS2_106.FIN2																	1058	8
TSS2	1101	TSS2_107.FIN2																	463.7	3.7
TSS2	1101	TSS2_108.FIN2																	1626	6
TSS2	1101	TSS2_109.FIN2																	2478	5.5
TSS2	1101	TSS2_110.FIN2																	432.2	2.85
TSS2	1101	TSS2_111.FIN2																	1586	6
TSS2	1101	TSS2_112.FIN2																	972	11
TSS2	1101	TSS2_113.FIN2																	460.2	4.45
TSS2	1101	TSS2_114.FIN2																	1121	8
TSS2	1101	TSS2_115.FIN2																	1203	10.5
TSS2	1101	TSS2_116.FIN2																	1501	7.5
TSS2	1101	TSS2_117.FIN2																	1127	11
TSS2	1101	TSS2_119.FIN2																	1281	8
TSS2	1101	TSS2_120.FIN2																	1332	6
HF1	1102	HF1_1.FIN2																	414.3	1.85
HF1	1102	HF1_3.FIN2																	2046.8	2.8
HF1	1102	HF1_6.FIN2																	963	5.5
HF1	1102	HF1_7.FIN2																	1000	6.5
HF1	1102	HF1_8.FIN2																	2037.1	2.7
HF1	1102	HF1_9.FIN2																	2163.9	3.05
HF1	1102	HF1_10.FIN2																	1638	7
HF1	1102	HF1_11.FIN2																	1878.6	2.2
HF1	1102	HF1_12.FIN2																	1004.9	4
HF1	1102	HF1_13.FIN2																	2717.5	2.3
HF1	1102	HF1_14.FIN2																	677.1	3.35
HF1	1102	HF1_15.FIN2																	737.5	4.85
HF1	1102	HF1_16.FIN2																	1640.1	2.5
HF1	1102	HF1_17.FIN2																	1625.1	2.55
HF1	1102	HF1_19.FIN2																	1030.8	4.05
HF1	1102	HF1_21.FIN2																	1146	5.5
HF1	1102	HF1_22.FIN2																	1151	6
HF1	1102	HF1_23.FIN2																	587.7	2.3
HF1	1102	HF1_24.FIN2																	935	8
HF1	1102	HF1_26.FIN2																	1155	5.5
HF1	1102	HF1_27.FIN2																	639	2.95
HF1	1102	HF1_28.FIN2																	1164.2	3.25
HF1	1102	HF1_29.FIN2																	1924.6	2.35
HF1	1102	HF1_30.FIN2																	436.6	2.65
HF1	1102	HF1_31.FIN2																	2514.3	2.9
HF1	1102	HF1_32.FIN2																	1663.2	3.25
HF1	1102	HF1_33.FIN2																	491	6
HF1	1102	HF1_34.FIN2																	1248	5.5
HF1	1102	HF1_35.FIN2																	2479.7	4.15
HF1	1102	HF1_36.FIN2																	1370	5
HF1	1102	HF1_37.FIN2																	587.6	2.55
HF1	1102	HF1_38.FIN2																	371.4	3.4
HF1	1102	HF1_39.FIN2																	437.2	3
HF1	1102	HF1_39.FIN2																	747	5.5
HF1	1102	HF1_40.FIN2																	1162	5
HF1	1102	HF1_41.FIN2																	1259	7.5
HF1	1102	HF1_42.FIN2																	1205.3	4.95
HF1	1102	HF1_43.FIN2																	1049.8	4.3
HF1	1102	HF1_44.FIN2																	593.4	1.75
HF1	1102	HF1_45.FIN2																	1143	10.5
HF1	1102	HF1_46.FIN2																	465.9	2.9
HF1	1102	HF1_48.FIN2																	1096	10
HF1	1102	HF1_49.FIN2																	1084	7.5
HF1	1102	HF1_50.FIN2																	562.1	2.4
HF1	1102	HF1_51.FIN2																	348.4	1.25
HF1	1102	HF1_52.FIN2																	553	4.55
HF1	1102	HF1_53.FIN2																	645.4	2.4
HF1	1102	HF1_54.FIN2																	2265	5.5
HF1	1102	HF1_55.FIN2																	2653.5	2.6
HF1	1102	HF1_56.FIN2																	1172	9.5
HF1	1102	HF1_57.FIN2																	2963.4	2.75
HF1	1102	HF1_58.FIN2																	348.8	1.5
HF1	1102	HF1_59.FIN2																	657.1	3.5
HF1	1102	HF1_61.FIN2																	1071.8	4.65
HF1	1102	HF1_63.FIN2																	1432.5	3.25
HF1	1102	HF1_64.FIN2																	477.2	2.55
HF1	1102	HF1_65.FIN2																	562.9	4.65
HF1	1102	HF1_66.FIN2																	1077	4.65
HF1	1102	HF1_67.FIN2																	2583.3	3
HF1	1102	HF1_68.FIN2																	534.3	3.15
HF1	1102	HF1_69.FIN2																	1023	5.5
HF1	1102	HF1_70.FIN2																	1499.2	3.5
HF1	1102	HF1_74.FIN2																	655.1	4.45
HF1	1102	HF1_75.FIN2																	1135	5
HF1	1102	HF1_76.FIN2																	384.3	3.1
HF1	1102	HF1_77.FIN2																	527.7	4.2
HF1	1102	HF1_78.FIN2																	2073	5.5
HF1	1102	HF1_79.FIN2																	428.3	2
HF1	1102	HF1_81.FIN2																	1634	6
HF1	1102	HF1_82.FIN2																	777	6
HF1	1102	HF1_83.FIN2																	768	9
HF1	1102	HF1_84.FIN2																	3386.8	2
HF1	1102	HF1_85.FIN2																	1463.7	3.75
HF1	1102	HF1_86.FIN2																	1011	5
HF1	1102	HF1_87.FIN2																	369.9	2.35
HF1	1102	HF1_88.FIN2																	995	5.5
HF1	1102	HF1_89.FIN2																	1138.9	3.7
HF1	1102	HF1_90.FIN2																	547.2	3.9
HF1	1102	HF1_91.FIN2																	731.7	2.85
HF1	1102	HF1_92.FIN2																	647.3	3.75
HF1	1102	HF1_93.FIN2																	1389.3	4.3
HF1	1102	HF1_94.FIN2																	549.2	3.45
HF1	1102	HF1_95.FIN2																	1156	11.5
HF1	1102	HF1_96.FIN2																	1071	7.5
HF1	1102	HF1_97.FIN2																	1067	13
HF1	1102	HF1_98.FIN2																	773.6	3.75
HF1	1102	HF1_99.FIN2																	2694.3	4.4
HF1	1102	HF1_100.FIN2																	975	8.5
HF1	1102	HF1_101.FIN2																	1013	6.5
HF1	1102	HF1_102.FIN2																	522	2.8
HF1	1102	HF1_103.FIN2																	532.9	3.55
HF1	1102	HF1_104.FIN2																	466.9	2.45
HF1	1102	HF1_105.FIN2																	1206	6
HF1	1102	HF1_107.FIN2																	1042	6.5
HF1	1102	HF1_108.FIN2																	1272.7	3.6
HF1	1102	HF1_109.FIN2																	835	8.5
HF1	1102	HF1_111.FIN2																	1008	7
HF1	1102	HF1_112.FIN2																	622.4	3.3
HF1	1102	HF1_113.FIN2																	437.1	1.85
HF1	1102	HF1_114.FIN2																	1522	9
HF1	1102	HF1_115.FIN2																	1443	12
HF1	1102	HF1_116.FIN2																	1135.1	4.1
HF1	1102	HF1_117.FIN2																	592.2	3.45
HF1	1102	HF1_119.FIN2																	1210	9
HF1	1102	HF1_120.FIN2																	1081	5.5
HF2	1103	HF2_2.FIN2																	965	6
HF2	1103	HF2_3.FIN2																	1102	13
HF2	1103	HF2_4.FIN2																	2689.9	3.95
HF2	1103	HF2_5.FIN2																	933	6
HF2	1103	HF2_6.FIN2																	525.4	2.25
HF2	1103	HF2_8.FIN2																	457.2	3.85
HF2	1103	HF2_9.FIN2																	2609.9	3.15
HF2	1103	HF2_10.FIN2																	449.3	4.45
HF2	1103	HF2_11.FIN2																	624.2	4.7
HF2	1103	HF2_12.FIN2																	439	5.5
HF2	1103	HF2_12.FIN2																	2818.7	4.45
HF2	1103	HF2_13.FIN2																	1231	6.5
HF2	1103	HF2_14.FIN2																	1174	5.5
HF2	1103	HF2_15.FIN2																	435.9	2.15
HF2	1103	HF2_16.FIN2																	1227	19.5
HF2	1103	HF2_17.FIN2																	1154.9	4.7
HF2	1103	HF2_18.FIN2																	415.5	1.55
HF2	1103	HF2_19.FIN2																	1017	12
HF2	1103	HF2_21.FIN2																	1153	6
HF2	1103	HF2_22.FIN2																	1173.3	4.35
HF2	1103	HF2_24.FIN2																	1070	6.5
HF2	1103	HF2_25.FIN2																	821	7
HF2	1103	HF2_26.FIN2																	424.5	1.9
HF2	1103	HF2_27.FIN2																	1028	7.5
HF2	1103	HF2_28.FIN2																	1106	6.5
HF2	1103	HF2_30.FIN2																	1180	6
HF2	1103	HF2_31.FIN2																	379.3	2.2
HF2	1103	HF2_32.FIN2																	1083	5.5
HF2	1103	HF2_33.FIN2																	1429.7	3.5
HF2	1103	HF2_34.FIN2																	1209.2	4.35
HF2	1103	HF2_35.FIN2																	422	9.5
HF2	1103	HF2_35.FIN2																	1188	5.5
HF2	1103	HF2_38.FIN2																	1654	5.5
HF2	1103	HF2_39.FIN2																	621.9	2.7
HF2	1103	HF2_40.FIN2																	1843.4	4.15
HF2	1103	HF2_41.FIN2																	531.5	4
HF2	1103	HF2_42.FIN2																	1129	8
HF2	1103	HF2_44.FIN2																	992	6.5
HF2	1103	HF2_45.FIN2																	2029.3	4.15
HF2	1103	HF2_46.FIN2																	1585	5
HF2	1103	HF2_48.FIN2																	1198	10
HF2	1103	HF2_49.FIN2																	2725	6
HF2	1103	HF2_50.FIN2																	1603.8	3.6
HF2	1103	HF2_51.FIN2																	1496	5.5
HF2	1103	HF2_52.FIN2																	375	6
HF2	1103	HF2_53.FIN2																	1057	12.5
HF2	1103	HF2_55.FIN2																	1140.9	4.75
HF2	1103	HF2_56.FIN2																	2093.5	4.4
HF2	1103	HF2_57.FIN2																	1050	7.5
HF2	1103	HF2_58.FIN2																	490.4	2.85
HF2	1103	HF2_59.FIN2																	1702.5	3.95
HF2	1103	HF2_60.FIN2																	589	7
HF2	1103	HF2_60.FIN2																	1929	5.5
HF2	1103	HF2_61.FIN2																	1386	5.5
HF2	1103	HF2_62.FIN2																	1472.4	4.15
HF2	1103	HF2_63.FIN2																	1062.9	3.1
HF2	1103	HF2_64.FIN2																	1792	16
HF2	1103	HF2_65.FIN2																	584.7	1.7
HF2	1103	HF2_66.FIN2																	408.4	3.05
HF2	1103	HF2_67.FIN2																	1064	8.5
HF2	1103	HF2_68.FIN2																	676	5.5
HF2	1103	HF2_69.FIN2																	1349.3	3.8
HF2	1103	HF2_70.FIN2																	1217	5
HF2	1103	HF2_71.FIN2																	1291.1	4.55
HF2	1103	HF2_72.FIN2																	1053	12
HF2	1103	HF2_73.FIN2																	1030.4	3.15
HF2	1103	HF2_75.FIN2																	1267	6
HF2	1103	HF2_76.FIN2																	1186	11
HF2	1103	HF2_77.FIN2																	574.5	2.4
HF2	1103	HF2_78.FIN2																	1019	9
HF2	1103	HF2_79.FIN2																	1574.8	3.3
HF2	1103	HF2_80.FIN2																	425.3	2
HF2	1103	HF2_81.FIN2																	688.7	3.55
HF2	1103	HF2_84.FIN2																	1365	5.5
HF2	1103	HF2_85.FIN2																	399.3	4.05
HF2	1103	HF2_86.FIN2																	1648.9	4.9
HF2	1103	HF2_87.FIN2																	1567	7
HF2	1103	HF2_88.FIN2																	1518.9	3.95
HF2	1103	HF2_89.FIN2																	1891.4	3.1
HF2	1103	HF2_90.FIN2																	526.3	3.5
HF2	1103	HF2_92.FIN2																	1007	7
HF2	1103	HF2_94.FIN2																	1093	7.5
HF2	1103	HF2_95.FIN2																	1611	7.5
HF2	1103	HF2_96.FIN2																	729	4.7
HF2	1103	HF2_97.FIN2																	527.4	3.05
HF2	1103	HF2_98.FIN2																	1910.2	3.35
HF2	1103	HF2_99.FIN2																	1892.8	3.25
HF2	1103	HF2_100.FIN2																	2196	6.5
HF2	1103	HF2_101.FIN2																	1131	10
HF2	1103	HF2_103.FIN2																	801.1	4.9
HF2	1103	HF2_104.FIN2																	1015.7	4.25
HF2	1103	HF2_105.FIN2																	1116	9.5
HF2	1103	HF2_106.FIN2																	1671.1	3.7
HF2	1103	HF2_107.FIN2																	3183	2.9
HF2	1103	HF2_109.FIN2																	1909	6.5
HF2	1103	HF2_110.FIN2																	1611.7	3.85
HF2	1103	HF2_111.FIN2																	451.4	2
HF2	1103	HF2_113.FIN2																	594.3	3
HF2	1103	HF2_114.FIN2																	1693.2	4.9
HF2	1103	HF2_115.FIN2																	819	7.5
HF2	1103	HF2_116.FIN2																	2085.8	4.25
HF2	1103	HF2_118.FIN2																	1018	8.5
HF2	1103	HF2_119.FIN2																	2746.1	4.75
HF2	1103	HF2_120.FIN2																	1072	7.5
LSS1	1008	LSS1_1.FIN2																	535.8	3.35	0.593692
LSS1	1008	LSS1_2.FIN2																	497.8	3.1	0.180469
LSS1	1008	LSS1_3.FIN2																	544.5	2.6	0.329489
LSS1	1008	LSS1_4.FIN2																	1145	9.5	1.04803
LSS1	1008	LSS1_5.FIN2																	862	49.5	1.74014
LSS1	1008	LSS1_6.FIN2																	1138	10	0.966608
LSS1	1008	LSS1_8.FIN2																	339.3	2.15	3.52573
LSS1	1008	LSS1_10.FIN2																	556	6	0.358423
LSS1	1008	LSS1_11.FIN2																	496.9	2.55	0.141072
LSS1	1008	LSS1_12.FIN2																	978	12.5	0.470348
LSS1	1008	LSS1_13.FIN2																	1070	10.5	3.14953
LSS1	1008	LSS1_14.FIN2																	1087	23	1.10396
LSS1	1008	LSS1_16.FIN2																	503.9	4.25	4.3833	Rim
LSS1	1008	LSS1_16.FIN2																	805	6	15.3523	Core
LSS1	1008	LSS1_17.FIN2																	514	5.5	3.56473
LSS1	1008	LSS1_18.FIN2																	2138	12.5	2.5725
LSS1	1008	LSS1_19.FIN2																	1025	21	2.34146
LSS1	1008	LSS1_20.FIN2																	1084	14.5	2.39852
LSS1	1008	LSS1_21.FIN2																	1030	12.5	6.1165
LSS1	1008	LSS1_22.FIN2																	1073	15	9.04007
LSS1	1008	LSS1_23.FIN2																	668.4	4.3	0.639215
LSS1	1008	LSS1_24.FIN2																	527	3.85	0.380952
LSS1	1008	LSS1_25.FIN2																	1077	10	4.05757
LSS1	1008	LSS1_26.FIN2																	1051	13	0.285442
LSS1	1008	LSS1_27.FIN2																	1067	20	6.09185
LSS1	1008	LSS1_28.FIN2																	1023	12	0.0977517
LSS1	1008	LSS1_29.FIN2																	669	7	16.0602
LSS1	1008	LSS1_30.FIN2																	566.2	4.8	0.492091
LSS1	1008	LSS1_31.FIN2																	578.4	3.6	0.416667
LSS1	1008	LSS1_32.FIN2																	527	2.65	0.93985
LSS1	1008	LSS1_33.FIN2																	540.9	3.9	1.11517
LSS1	1008	LSS1_34.FIN2																	505.2	2.85	0.276352
LSS1	1008	LSS1_35.FIN2																	1149	11.5	14.4473
LSS1	1008	LSS1_36.FIN2																	392.3	3.05	4.71217
LSS1	1008	LSS1_37.FIN2																	479.9	2.7	1.03114
LSS1	1008	LSS1_38.FIN2																	679	9.5	11.7035
LSS1	1008	LSS1_39.FIN2																	654	10.5	0.607903	Rim
LSS1	1008	LSS1_39.FIN2																	811	5	3.90995	Core
LSS1	1008	LSS1_40.FIN2																	1888	8.5	9.32203
LSS1	1008	LSS1_41.FIN2																	1552	11	6.95876
LSS1	1008	LSS1_42.FIN2																	1440	15	3.61111
LSS1	1008	LSS1_43.FIN2																	1295	16	0.926641
LSS1	1008	LSS1_44.FIN2																	2067	12.5	1.54814
LSS1	1008	LSS1_45.FIN2																	552.3	3.65	0.558156
LSS1	1008	LSS1_46.FIN2																	1170	22	1.11111
LSS1	1008	LSS1_47.FIN2																	1417	10.5	0.282287
LSS1	1008	LSS1_48.FIN2																	813.6	4.85	0.659341
LSS1	1008	LSS1_49.FIN2																	1662	10	1.20337
LSS1	1008	LSS1_50.FIN2																	598	8	2.60586	Rim
LSS1	1008	LSS1_50.FIN2																	761	6.5	7.98065	Core
LSS1	1008	LSS1_51.FIN2																	555	6.5	0.359066	Rim
LSS1	1008	LSS1_51.FIN2																	1114	11.5	6.1939	Core
LSS1	1008	LSS1_52.FIN2																	1158	12	18.7392
LSS1	1008	LSS1_53.FIN2																	538	6.5	0.373134
LSS1	1008	LSS1_54.FIN2																	499.6	3.05	0.339118
LSS1	1008	LSS1_55.FIN2																	1027	14.5	0.681597
LSS1	1008	LSS1_56.FIN2																	1211	10.5	0.0825764
LSS1	1008	LSS1_57.FIN2																	1101	27	11.4441
LSS1	1008	LSS1_58.FIN2																	888	23	1.8018
LSS1	1008	LSS1_59.FIN2																	574	9	1.77305	Rim
LSS1	1008	LSS1_59.FIN2																	1091	12	0.274977	Core
LSS1	1008	LSS1_60.FIN2																	801	5	0.149589
LSS1	1008	LSS1_61.FIN2																	1199	24	0.58382
LSS1	1008	LSS1_62.FIN2																	569	9.5	2.90102	Rim
LSS1	1008	LSS1_62.FIN2																	951	21	0.84122	Core
LSS1	1008	LSS1_63.FIN2																	717	7.5	12.3472
LSS1	1008	LSS1_64.FIN2																	2704	9.5	7.9142
LSS1	1008	LSS1_65.FIN2																	1529	15.5	0.392413
LSS1	1008	LSS1_66.FIN2																	637	5	5.43349
LSS1	1008	LSS1_67.FIN2																	616	4.2	0.489396
LSS1	1008	LSS1_68.FIN2																	1235	28.5	1.86235
LSS1	1008	LSS1_69.FIN2																	2024	8	11.5119
LSS1	1008	LSS1_70.FIN2																	1875	10	3.68
LSS1	1008	LSS1_71.FIN2																	659	6	2.01238	Rim
LSS1	1008	LSS1_71.FIN2																	765	7.5	0.393701	Core
LSS1	1008	LSS1_72.FIN2																	1099	13.5	6.00546
LSS1	1008	LSS1_73.FIN2																	2123	7.5	0.518135
LSS1	1008	LSS1_74.FIN2																	1119	21.5	1.16175
LSS1	1008	LSS1_75.FIN2																	1731	10.5	9.01213
LSS1	1008	LSS1_76.FIN2																	647.8	4.1	0.491551	Rim
LSS1	1008	LSS1_76.FIN2																	690	7.5	0.58309	Core
LSS1	1008	LSS1_77.FIN2																	347.5	3.35	2.11268	Rim
LSS1	1008	LSS1_77.FIN2																	376	3.2	0.266667	Core
LSS1	1008	LSS1_78.FIN2																	836	5	3.12862
LSS1	1008	LSS1_79.FIN2																	2700	11	3
LSS1	1008	LSS1_80.FIN2																	517	7	0.767754	Rim
LSS1	1008	LSS1_80.FIN2																	1028	23.5	10.4086	Core
LSS1	1008	LSS1_81.FIN2																	1413	10	1.13234
LSS1	1008	LSS1_82.FIN2																	595	10	0	Rim
LSS1	1008	LSS1_82.FIN2																	2009	11.5	0.049776	Core
LSS1	1008	LSS1_83.FIN2																	589	2.6	0.838897
LSS1	1008	LSS1_84.FIN2																	984	16.5	0.325203
LSS1	1008	LSS1_86.FIN2																	540	14.5	4.08526	Rim
LSS1	1008	LSS1_86.FIN2																	2419	8.5	4.17528	Core
LSS1	1008	LSS1_88.FIN2																	598.1	4	6.79445
LSS1	1008	LSS1_89.FIN2																	1287	11	2.4087
LSS1	1008	LSS1_90.FIN2																	677.8	3.95	0.325636
LSS1	1008	LSS1_91.FIN2																	746	7.5	0.665779	Rim
LSS1	1008	LSS1_91.FIN2																	820	10	0.244499	Core
LSS1	1008	LSS1_92.FIN2																	1554	11	3.3462
LSS1	1008	LSS1_93.FIN2																	632.7	3.7	0.796559
LSS1	1008	LSS1_94.FIN2																	1101	20	1.54405
LSS1	1008	LSS1_95.FIN2																	1115	26.5	1.43498
LSS1	1008	LSS1_96.FIN2																	900	20	3.88889
LSS1	1008	LSS1_97.FIN2																	986	9.5	10.4868
LSS1	1008	LSS1_98.FIN2																	554	5.5	2.97723
LSS1	1008	LSS1_99.FIN2																	383.5	2.5	1.18526
LSS1	1008	LSS1_100.FIN2																	546	9	1.08696
LSS1	1008	LSS1_101.FIN2																	1883	12	0.0531067
LSS1	1008	LSS1_102.FIN2																	747	8.5	0.268456
LSS1	1008	LSS1_103.FIN2																	1088	20.5	2.57353
LSS1	1008	LSS1_104.FIN2																	1142	11	22.2417
LSS1	1008	LSS1_105.FIN2																	1098	12	9.56284
LSS1	1008	LSS1_106.FIN2																	1070	13	0.280374
LSS1	1008	LSS1_107.FIN2																	1120	22.5	1.25
LSS1	1008	LSS1_108.FIN2																	472.3	3.55	7.21022
LSS1	1008	LSS1_109.FIN2																	341.5	3.95	0.928343
LSS1	1008	LSS1_110.FIN2																	579.1	4.3	6.59677
LSS1	1008	LSS1_111.FIN2																	627.4	4.05	0.412698
LSS1	1008	LSS1_112.FIN2																	1055	14	0
LSS1	1008	LSS1_113.FIN2																	1624	11.5	0.738916
LSS1	1008	LSS1_114.FIN2																	1119	24	15.7283
LSS1	1008	LSS1_115.FIN2																	590.5	3.9	0.101506
LSS1	1008	LSS1_116.FIN2																	687.3	3.3	0.21777
LSS1	1008	LSS1_117.FIN2																	609.7	3.7	1.08696
LSS1	1008	LSS1_118.FIN2																	627	8.5	2.33645
LSS1	1008	LSS1_119.FIN2																	795.4	3.9	0.760071
LSS1	1008	LSS1_121.FIN2																	1094	22.5	2.55941
LSS1	1008	LSS1_122.FIN2																	2087	12.5	0.574988
LSS1	1008	LSS1_123.FIN2																	636.2	3.45	0.779788
LSS1	1008	LSS1_124.FIN2																	544	10.5	0.548446	Rim
LSS1	1008	LSS1_124.FIN2																	613.3	3.2	0.0977358	Core
LSS1	1008	LSS1_125.FIN2																	313.2	3.5	1.03226
LSS1	1008	LSS1_126.FIN2																	2108	7	35.4839
LSS1	1008	LSS1_127.FIN2																	1094	11	0.548446
LSS1	1008	LSS1_128.FIN2																	530	6	3.46084
LSS1	1008	LSS1_129.FIN2																	328.3	2.05	0.243087
LSS1	1008	LSS1_130.FIN2																	1309	14.5	20.3972
WCSS1	1009	WCSS1_1.FIN2																	1483	20	17.1949
WCSS1	1009	WCSS1_2.FIN2																	1117	18.5	0.626679
WCSS1	1009	WCSS1_3.FIN2																	997	20	0.601805
WCSS1	1009	WCSS1_4.FIN2																	479.5	3.8	0.929752
WCSS1	1009	WCSS1_5.FIN2																	611.2	2.65	0.180298
WCSS1	1009	WCSS1_6.FIN2																	1030	21.5	0.776699
WCSS1	1009	WCSS1_7.FIN2																	558.7	3	0.249955
WCSS1	1009	WCSS1_8.FIN2																	569	2.2	0.402591
WCSS1	1009	WCSS1_9.FIN2																	2192	8	1.18613
WCSS1	1009	WCSS1_10.FIN2																	1051	15.5	1.9981
WCSS1	1009	WCSS1_11.FIN2																	2683	7	27.842
WCSS1	1009	WCSS1_12.FIN2																	1721	9.5	0.116212
WCSS1	1009	WCSS1_13.FIN2																	1380	10.5	1.01449
WCSS1	1009	WCSS1_14.FIN2																	1079	11	0.880445
WCSS1	1009	WCSS1_15.FIN2																	1081	9	0.0277521
WCSS1	1009	WCSS1_16.FIN2																	2147	13.5	0.558919
WCSS1	1009	WCSS1_17.FIN2																	546	8	8.69565	Rim
WCSS1	1009	WCSS1_17.FIN2																	986	10.5	1.2069	Core
WCSS1	1009	WCSS1_18.FIN2																	2593	14.5	3.50945
WCSS1	1009	WCSS1_19.FIN2																	1100	16	1.90909
WCSS1	1009	WCSS1_20.FIN2																	393.7	3.65	5.8134
WCSS1	1009	WCSS1_21.FIN2																	553.7	2.8	0.73503
WCSS1	1009	WCSS1_22.FIN2																	565.8	4.55	0.56239
WCSS1	1009	WCSS1_23.FIN2																	461.6	2.5	0.435161
WCSS1	1009	WCSS1_24.FIN2																	322.9	3.8	13.6631
WCSS1	1009	WCSS1_25.FIN2																	521.7	4.1	2.30337	Rim
WCSS1	1009	WCSS1_25.FIN2																	636.1	2.8	0.0471846	Core
WCSS1	1009	WCSS1_26.FIN2																	650.2	3.9	0.42879
WCSS1	1009	WCSS1_27.FIN2																	1055	13.5	1.13744
WCSS1	1009	WCSS1_28.FIN2																	940	20	2.44681
WCSS1	1009	WCSS1_29.FIN2																	687	8	9.48617	Rim
WCSS1	1009	WCSS1_29.FIN2																	1090	12.5	7.47706	Core
WCSS1	1009	WCSS1_30.FIN2																	1964	7.5	0.86558	Core
WCSS1	1009	WCSS1_31.FIN2																	639.9	3.75	0.636646
WCSS1	1009	WCSS1_32.FIN2																	1823	11	21.1739	Rim
WCSS1	1009	WCSS1_32.FIN2																	2054	18.5	17.7702	Core
WCSS1	1009	WCSS1_33.FIN2																	1148	10	3.23171
WCSS1	1009	WCSS1_34.FIN2																	1024	11.5	0.214844
WCSS1	1009	WCSS1_35.FIN2																	455.6	2.7	0.956522
WCSS1	1009	WCSS1_36.FIN2																	1131	29	2.0336
WCSS1	1009	WCSS1_37.FIN2																	560.6	2.35	0.284596
WCSS1	1009	WCSS1_38.FIN2																	1013	27.5	0.197433
WCSS1	1009	WCSS1_39.FIN2																	1072	12	1.39925
WCSS1	1009	WCSS1_40.FIN2																	581.5	3.7	1.17267
WCSS1	1009	WCSS1_41.FIN2																	671.2	2.45	0.621854
WCSS1	1009	WCSS1_42.FIN2																	606.3	3.15	1.12524
WCSS1	1009	WCSS1_43.FIN2																	1212	12	0.915842
WCSS1	1009	WCSS1_44.FIN2																	1084	11.5	7.04797
WCSS1	1009	WCSS1_45.FIN2																	1028	19.5	0.194553
WCSS1	1009	WCSS1_46.FIN2																	1071	22.5	0.280112
WCSS1	1009	WCSS1_47.FIN2																	569.6	3.15	0.246392
WCSS1	1009	WCSS1_48.FIN2																	1247	13	3.52847
WCSS1	1009	WCSS1_49.FIN2																	976	32.5	4.91803
WCSS1	1009	WCSS1_50.FIN2																	1019	14.5	1.737
WCSS1	1009	WCSS1_51.FIN2																	3070.3	4.9	9.7808
WCSS1	1009	WCSS1_52.FIN2																	444.9	1.9	0.383574
WCSS1	1009	WCSS1_53.FIN2																	621.8	2.6	0.144532
WCSS1	1009	WCSS1_54.FIN2																	2165	9	2.86374
WCSS1	1009	WCSS1_55.FIN2																	2646	5.5	0.415722
WCSS1	1009	WCSS1_56.FIN2																	930	21	2.90323
WCSS1	1009	WCSS1_57.FIN2																	966	30	2.69151
WCSS1	1009	WCSS1_58.FIN2																	968	25	3.6157
WCSS1	1009	WCSS1_59.FIN2																	959	40	5.21376
WCSS1	1009	WCSS1_60.FIN2																	482.6	3.35	0.412712
WCSS1	1009	WCSS1_61.FIN2																	637.9	3.3	0.298742
WCSS1	1009	WCSS1_62.FIN2																	2717	10	0.809717
WCSS1	1009	WCSS1_63.FIN2																	540.6	4.65	1.61654
WCSS1	1009	WCSS1_64.FIN2																	1811	8	0.276091
WCSS1	1009	WCSS1_65.FIN2																	2765	12.5	16.962
WCSS1	1009	WCSS1_66.FIN2																	1003	22	1.29611
WCSS1	1009	WCSS1_67.FIN2																	1220	14	0.819672
WCSS1	1009	WCSS1_68.FIN2																	1134	17	0.26455
WCSS1	1009	WCSS1_69.FIN2																	1234	14	0.243112
WCSS1	1009	WCSS1_70.FIN2																	1612	7.5	3.10174
WCSS1	1009	WCSS1_71.FIN2																	733	6	3.04233	Rim
WCSS1	1009	WCSS1_71.FIN2																	777	5	0.387597	Core
WCSS1	1009	WCSS1_72.FIN2																	975	16.5	1.4359
WCSS1	1009	WCSS1_73.FIN2																	479.6	2.85	0.229885
WCSS1	1009	WCSS1_74.FIN2																	704.5	3.55	0.313256
WCSS1	1009	WCSS1_75.FIN2																	1638	9.5	0.976801
WCSS1	1009	WCSS1_76.FIN2																	423.8	3.45	0.0942951
WCSS1	1009	WCSS1_77.FIN2																	911	36	6.4764
WCSS1	1009	WCSS1_78.FIN2																	978	19	0.102249
WCSS1	1009	WCSS1_79.FIN2																	707	2.95	0.197628
WCSS1	1009	WCSS1_80.FIN2																	833.9	3.75	3.79557
WCSS1	1009	WCSS1_81.FIN2																	591.3	4.15	2.9064
WCSS1	1009	WCSS1_82.FIN2																	1092	13	1.19048
WCSS1	1009	WCSS1_83.FIN2																	1031	11.5	0.252182
WCSS1	1009	WCSS1_84.FIN2																	1358	14.5	0.736377
WCSS1	1009	WCSS1_85.FIN2																	915	21	1.85792
WCSS1	1009	WCSS1_86.FIN2																	1654	10.5	0.241838
WCSS1	1009	WCSS1_87.FIN2																	1092	17.5	3.663
WCSS1	1009	WCSS1_88.FIN2																	1154	15.5	1.29983
WCSS1	1009	WCSS1_89.FIN2																	494.9	3.15	1
WCSS1	1009	WCSS1_90.FIN2																	436.3	2.75	11.501
WCSS1	1009	WCSS1_91.FIN2																	521.6	2.85	0.248614
WCSS1	1009	WCSS1_92.FIN2																	1071	11	1.4099
WCSS1	1009	WCSS1_93.FIN2																	1985	8.5	1.10831
WCSS1	1009	WCSS1_94.FIN2																	1110	14	0.18018
WCSS1	1009	WCSS1_95.FIN2																	1136	13	6.16197
WCSS1	1009	WCSS1_96.FIN2																	584.3	3.25	3.10116
WCSS1	1009	WCSS1_97.FIN2																	480.4	2.2	0.620604
WCSS1	1009	WCSS1_98.FIN2																	1185	12	0.337553
WCSS1	1009	WCSS1_99.FIN2																	374.8	2.25	0.0533903
WCSS1	1009	WCSS1_100.FIN2																	598	5.5	0.673401
WCSS1	1009	WCSS1_101.FIN2																	947	21.5	0.211193
WCSS1	1009	WCSS1_102.FIN2																	419.1	2.25	0.359195
WCSS1	1009	WCSS1_103.FIN2																	2077	7	0.192585
WCSS1	1009	WCSS1_104.FIN2																	494	5	5.72519
WCSS1	1009	WCSS1_105.FIN2																	1775	15.5	0.225352
WCSS1	1009	WCSS1_106.FIN2																	1676	12	0
WCSS1	1009	WCSS1_107.FIN2																	528.3	2.55	0.170648
WCSS1	1009	WCSS1_108.FIN2																	2678	5.5	0.186706
WCSS1	1009	WCSS1_109.FIN2																	1032	14.5	1.25969
WCSS1	1009	WCSS1_110.FIN2																	449	5	0.883002
WCSS1	1009	WCSS1_111.FIN2																	1740	12	0.344828
WCSS1	1009	WCSS1_112.FIN2																	1183	16	0.845309
WCSS1	1009	WCSS1_113.FIN2																	534.1	2.7	1.09259
WCSS1	1009	WCSS1_114.FIN2																	375.2	3.05	0.477454
WCSS1	1009	WCSS1_115.FIN2																	467.5	4.55	5.36437
WCSS1	1009	WCSS1_116.FIN2																	597.1	2.4	0.521886
WCSS1	1009	WCSS1_117.FIN2																	616.7	2.4	0.800915
WCSS1	1009	WCSS1_118.FIN2																	966	19.5	0.414079
WCSS1	1009	WCSS1_119.FIN2																	652.1	3.65	1.96933
WCSS1	1009	WCSS1_120.FIN2																	455.9	1.9	0.501964
WCSS1	1009	WCSS1_121.FIN2																	524.2	2.65	0.363776
WCSS1	1009	WCSS1_122.FIN2																	1166	8.5	6.31218
WCSS1	1009	WCSS1_123.FIN2																	644.8	2.1	0.373599
WCSS1	1009	WCSS1_124.FIN2																	398.2	1.8	0.68268
WCSS1	1009	WCSS1_125.FIN2																	1091	12	0.458295
WCSS1	1009	WCSS1_126.FIN2																	1041	10	2.20941
WCSS1	1009	WCSS1_127.FIN2																	1002	14	2.69461
WCSS1	1009	WCSS1_128.FIN2																	2642	6	3.86071
WCSS1	1009	WCSS1_129.FIN2																	2698	6	1.44552
WCSS1	1009	WCSS1_130.FIN2																	598.4	3.25	1.09091
Bcsand	2	BCsand-10																	300.559	6.80891
Bcsand	2	BCsand-14																	350.179	7.94156
Bcsand	2	BCsand-79																	365.127	19.2996
Bcsand	2	BCsand-89																	369.709	12.5191
Bcsand	2	BCsand-78																	370.977	8.13274
Bcsand	2	BCsand-39																	387.034	10.0211
Bcsand	2	BCsand-28																	393.525	6.38933
Bcsand	2	BCsand-66																	394.273	13.3391
Bcsand	2	BCsand-4																	394.738	5.35665
Bcsand	2	BCsand-R33-1																	405.249	14.8869
Bcsand	2	BCsand-24																	405.297	7.69143
Bcsand	2	BCsand-43																	408.563	6.51219
Bcsand	2	BCsand-15																	410.266	7.07614
Bcsand	2	BCsand-81																	410.322	7.81481
Bcsand	2	BCsand-87																	411.661	14.468
Bcsand	2	BCsand-R33-2																	416.444	10.0364
Bcsand	2	BCsand-20																	421.802	6.22498
Bcsand	2	BCsand-29																	423.237	7.85899
Bcsand	2	BCsand-53																	424.267	8.98587
Bcsand	2	BCsand-45																	440.388	4.24381
Bcsand	2	BCsand-90																	444.402	5.35353
Bcsand	2	BCsand-95																	454.736	7.24182
Bcsand	2	BCsand-18																	456.711	15.5923
Bcsand	2	BCsand-61																	462.571	10.6856
Bcsand	2	BCsand-98																	472.228	18.4814
Bcsand	2	BCsand-74																	518.87	9.70685
Bcsand	2	BCsand-83																	547.855	8.26157
Bcsand	2	BCsand-37																	576.707	16.3982
Bcsand	2	BCsand-100																	612.727	9.92958
Bcsand	2	BCsand-19																	613.64	12.3848
Bcsand	2	BCsand-91																	971.34	14.0525
Bcsand	2	BCsand-36																	996.242	18.8994
Bcsand	2	BCsand-13																	998.71	56.6569
Bcsand	2	BCsand-38																	1002.67	38.692
Bcsand	2	BCsand-86																	1009.55	83.8676
Bcsand	2	BCsand-32																	1019.44	70.9956
Bcsand	2	BCsand-6																	1028.79	111.004
Bcsand	2	BCsand-31																	1030.63	82.2274
Bcsand	2	BCsand-58																	1039.31	10.1021
Bcsand	2	BCsand-71																	1041.75	117.763
Bcsand	2	BCsand-70																	1042.22	44.2693
Bcsand	2	BCsand-49																	1042.8	11.2978
Bcsand	2	BCsand-75																	1044.57	20.8519
Bcsand	2	BCsand-50																	1048.92	25.6173
Bcsand	2	BCsand-35																	1050.2	60.5262
Bcsand	2	BCsand-33																	1050.96	18.1529
Bcsand	2	BCsand-12																	1061.71	18.8934
Bcsand	2	BCsand-65																	1083.1	25.2123
Bcsand	2	BCsand-54																	1097.05	30.3962
Bcsand	2	BCsand-7																	1105.67	100.188
Bcsand	2	BCsand-64																	1124.1	23.1682
Bcsand	2	BCsand-59																	1132.32	172.117
Bcsand	2	BCsand-1																	1147.44	101.17
Bcsand	2	BCsand-88																	1150.54	29.2864
Bcsand	2	BCsand-42																	1151.62	20.2266
Bcsand	2	BCsand-80																	1153.44	21.1601
Bcsand	2	BCsand-17																	1158.65	25.6478
Bcsand	2	BCsand-77																	1173.45	30.0246
Bcsand	2	BCsand-78																	1204.49	35.0193
Bcsand	2	BCsand-44																	1215.22	68.6563
Bcsand	2	BCsand-62																	1230.39	72.5366
Bcsand	2	BCsand-99																	1237.76	34.5034
Bcsand	2	BCsand-11																	1244.62	9.28261
Bcsand	2	BCsand-47																	1264.78	21.9191
Bcsand	2	BCsand-26																	1278.07	123.962
Bcsand	2	BCsand-9																	1279.89	151.828
Bcsand	2	BCsand-27																	1285.06	32.2318
Bcsand	2	BCsand-51																	1316.61	16.0479
Bcsand	2	BCsand-3																	1380.63	30.2733
Bcsand	2	BCsand-23																	1408.53	46.1653
Bcsand	2	BCsand-96																	1418.09	53.8848
Bcsand	2	BCsand-21																	1431.03	46.4842
Bcsand	2	BCsand-69																	1460.76	45.8219
Bcsand	2	BCsand-85																	1479.01	41.0027
Bcsand	2	BCsand-41																	1487.74	20.2771
Bcsand	2	BCsand-60																	1487.76	14.749
Bcsand	2	BCsand-30																	1551.2	23.9115
Bcsand	2	BCsand-72																	1568.16	8.17974
Bcsand	2	BCsand-56																	1603.67	33.9089
Bcsand	2	BCsand-97																	1643.9	19.7952
Bcsand	2	BCsand-52																	1658.4	23.8618
Bcsand	2	BCsand-25																	1680.11	39.1721
Bcsand	2	BCsand-22																	1724.03	33.3345
Bcsand	2	BCsand-55																	1756.47	21.4207
Bcsand	2	BCsand-77																	1765.4	102.789
Bcsand	2	BCsand-94																	1802.16	18.7383
Bcsand	2	BCsand-46																	1870.47	11.9273
Bcsand	2	BCsand-92																	1903.29	23.7926
Bcsand	2	BCsand-84																	2068.86	5.51565
Bcsand	2	BCsand-87																	2183.41	11.8621
Bcsand	2	BCsand-2																	2797.5	6.88606
Bcsilt	3	BCsilt-73																	321.372	14.6962
Bcsilt	3	BCsilt-65																	353.778	15.1001
Bcsilt	3	BCsilt-54																	397.677	11.8196
Bcsilt	3	BCsilt-3																	407.419	3.31661
Bcsilt	3	BCsilt-R33-1																	411.986	12.572
Bcsilt	3	BCsilt-87																	419.715	18.9294
Bcsilt	3	BCsilt-R33-2																	420.845	9.30509
Bcsilt	3	BCsilt-55																	421.106	8.14782
Bcsilt	3	BCsilt-92																	424.909	7.26396
Bcsilt	3	BCsilt-68																	425.901	13.2201
Bcsilt	3	BCsilt-58																	429.677	19.849
Bcsilt	3	BCsilt-52																	431.705	19.449
Bcsilt	3	BCsilt-72																	440.154	19.1308
Bcsilt	3	BCsilt-41																	446.928	19.3547
Bcsilt	3	BCsilt-97																	447.92	6.29128
Bcsilt	3	BCsilt-38																	468.874	13.9972
Bcsilt	3	BCsilt-75																	483.519	41.5295
Bcsilt	3	BCsilt-11																	789.835	14.2027
Bcsilt	3	BCsilt-66																	920.419	30.0966
Bcsilt	3	BCsilt-49																	956.714	18.1908
Bcsilt	3	BCsilt-82																	985.136	82.3813
Bcsilt	3	BCsilt-25																	996.365	112.331
Bcsilt	3	BCsilt-79																	997.559	61.3958
Bcsilt	3	BCsilt-7																	1002.98	35.3342
Bcsilt	3	BCsilt-69																	1005.41	53.5723
Bcsilt	3	BCsilt-21																	1010.85	30.0214
Bcsilt	3	BCsilt-80																	1017.55	10.6597
Bcsilt	3	BCsilt-100																	1018.17	15.0083
Bcsilt	3	BCsilt-13																	1019.23	34.7003
Bcsilt	3	BCsilt-45																	1022.28	25.0956
Bcsilt	3	BCsilt-67																	1022.67	13.1054
Bcsilt	3	BCsilt-35																	1031.8	74.7644
Bcsilt	3	BCsilt-1																	1033.54	33.2699
Bcsilt	3	BCsilt-89																	1033.6	34.6299
Bcsilt	3	BCsilt-15																	1034.86	38.2973
Bcsilt	3	BCsilt-95																	1035.24	31.5612
Bcsilt	3	BCsilt-96																	1045.64	16.0951
Bcsilt	3	BCsilt-83																	1046.95	16.9784
Bcsilt	3	BCsilt-6																	1048.6	104.114
Bcsilt	3	BCsilt-28																	1050.6	17.2999
Bcsilt	3	BCsilt-51																	1058.94	29.7455
Bcsilt	3	BCsilt-86																	1066.37	21.4703
Bcsilt	3	BCsilt-26																	1073.28	17.3372
Bcsilt	3	BCsilt-81																	1077.82	46.8927
Bcsilt	3	BCsilt-50																	1077.9	20.4313
Bcsilt	3	BCsilt-39																	1082.86	57.6571
Bcsilt	3	BCsilt-53																	1087.75	46.1299
Bcsilt	3	BCsilt-90																	1091.15	21.3941
Bcsilt	3	BCsilt-17																	1093.72	154.461
Bcsilt	3	BCsilt-19																	1098.76	35.8658
Bcsilt	3	BCsilt-61																	1106.96	25.9799
Bcsilt	3	BCsilt-39																	1120.9	98.7036
Bcsilt	3	BCsilt-16																	1122.6	13.0545
Bcsilt	3	BCsilt-46																	1128	40.7288
Bcsilt	3	BCsilt-22																	1132.96	137.082
Bcsilt	3	BCsilt-5																	1136.28	97.2377
Bcsilt	3	BCsilt-8																	1147.15	11.9528
Bcsilt	3	BCsilt-64																	1164.14	58.3976
Bcsilt	3	BCsilt-84																	1168.49	19.0066
Bcsilt	3	BCsilt-56																	1171.55	30.6056
Bcsilt	3	BCsilt-32																	1173.27	19.1135
Bcsilt	3	BCsilt-10																	1175.89	11.6964
Bcsilt	3	BCsilt-94																	1176.88	24.6181
Bcsilt	3	BCsilt-44																	1179.5	62.2899
Bcsilt	3	BCsilt-30																	1186.45	24.9234
Bcsilt	3	BCsilt-85																	1200.73	68.9411
Bcsilt	3	BCsilt-93																	1214.17	56.1556
Bcsilt	3	BCsilt-62																	1214.35	13.8444
Bcsilt	3	BCsilt-98																	1300.43	47.2372
Bcsilt	3	BCsilt-60																	1307.61	75.0802
Bcsilt	3	BCsilt-29																	1316.44	42.624
Bcsilt	3	BCsilt-57																	1318.09	21.1115
Bcsilt	3	BCsilt-74																	1344.57	23.4256
Bcsilt	3	BCsilt-27																	1472.17	9.84261
Bcsilt	3	BCsilt-9																	1496.55	36.7285
Bcsilt	3	BCsilt-42																	1548.69	36.8426
Bcsilt	3	BCsilt-33																	1582.99	26.7634
Bcsilt	3	BCsilt-77																	1614.61	22.958
Bcsilt	3	BCsilt-20																	1630.32	23.9708
Bcsilt	3	BCsilt-34																	1638.81	16.9777
Bcsilt	3	BCsilt-47																	1692.04	21.952
Bcsilt	3	BCsilt-76																	1701.06	8.31537
Bcsilt	3	BCsilt-43																	1749.91	13.9008
Bcsilt	3	BCsilt-70																	1806.21	11.1253
Bcsilt	3	BCsilt-91																	2567.23	12.7923
Bcsilt	3	BCsilt-14																	2696.01	19.4222
Bcsilt	3	BCsilt-36																	2888.15	15.4284
Rader	4	rader-27																	301.817	3.96215
Rader	4	rader-65																	324.1	4.70419
Rader	4	rader-36																	350.758	12.8646
Rader	4	rader-61																	362.906	9.9863
Rader	4	rader-40																	372.899	7.96406
Rader	4	rader-95																	373.659	6.46917
Rader	4	rader-29																	389.893	15.4609
Rader	4	rader-22																	402.438	6.11448
Rader	4	rader-R33-2																	408.964	14.1474
Rader	4	rader-R33-1																	417.087	8.34672
Rader	4	rader-14																	418.708	6.5041
Rader	4	rader-59																	424.58	9.0578
Rader	4	rader-89																	426.082	14.9732
Rader	4	rader-28																	429.032	7.1787
Rader	4	rader-38																	441.438	16.2494
Rader	4	rader-69																	443.443	6.87189
Rader	4	rader-44																	447.269	13.022
Rader	4	rader-93																	463.785	10.1546
Rader	4	rader-1																	480.95	4.71135
Rader	4	rader-56																	483.969	27.4362
Rader	4	rader-51																	487.337	16.5608
Rader	4	rader-80																	491.335	18.8722
Rader	4	rader-47																	540.472	4.63259
Rader	4	rader-3																	543.823	10.9277
Rader	4	rader-55																	566.559	23.3647
Rader	4	rader-74																	586.711	4.47945
Rader	4	rader-9																	600.132	12.6057
Rader	4	rader-25																	604.418	19.639
Rader	4	rader-68																	604.845	12.6224
Rader	4	rader-4																	629.573	6.63182
Rader	4	rader-77																	639.443	16.7277
Rader	4	rader-39																	933.83	64.9277
Rader	4	rader-60																	937.393	188.281
Rader	4	rader-64																	954.574	18.4961
Rader	4	rader-10																	957.716	74.0571
Rader	4	rader-11																	958.264	158.24
Rader	4	rader-54																	969.124	26.7481
Rader	4	rader-82																	995.764	55.7224
Rader	4	rader-85																	1008.01	42.5117
Rader	4	rader-83																	1030.13	11.8071
Rader	4	rader-16																	1037.66	6.05392
Rader	4	rader-90																	1042.35	43.8883
Rader	4	rader-76																	1045.01	28.5401
Rader	4	rader-58																	1046.9	28.0641
Rader	4	rader-6																	1048.42	81.7339
Rader	4	rader-92																	1061.38	83.2973
Rader	4	rader-26																	1101.56	31.9149
Rader	4	rader-96																	1110.01	12.3166
Rader	4	rader-19																	1144.31	19.1095
Rader	4	rader-15																	1158.64	22.7163
Rader	4	rader-17																	1165.96	144.31
Rader	4	rader-94																	1169.24	20.2082
Rader	4	rader-72																	1177	16.2802
Rader	4	rader-86																	1178.99	32.3437
Rader	4	rader-42																	1194.19	49.5851
Rader	4	rader-98																	1207.62	106.287
Rader	4	rader-71																	1214.47	17.8993
Rader	4	rader-73																	1234.78	32.4895
Rader	4	rader-7																	1235.87	16.008
Rader	4	rader-52																	1263.47	38.9827
Rader	4	rader-63																	1303.14	26.5188
Rader	4	rader-20																	1329.05	17.9068
Rader	4	rader-91																	1465.91	13.2582
Rader	4	rader-88																	1476.57	22.4156
Rader	4	rader-5																	1499.85	14.6547
Rader	4	rader-84																	1505.29	43.9932
Rader	4	rader-31																	1510.38	16.3249
Rader	4	rader-12																	1518.13	26.8821
Rader	4	rader-70																	1537.85	24.4543
Rader	4	rader-57																	1538.22	18.9684
Rader	4	rader-21																	1649.26	35.6008
Rader	4	rader-97																	1666.57	11.5051
Rader	4	rader-66																	1680.23	40.0138
Rader	4	rader-35																	1751.48	20.1257
Rader	4	rader-30																	1751.57	5.2687
Rader	4	rader-100																	1757.76	8.11131
Rader	4	rader-46																	1790.37	21.6328
Rader	4	rader-13																	1814.43	7.31022
Rader	4	rader-99																	1821.61	16.5054
Rader	4	rader-24																	2057.84	40.3781
Rader	4	rader-79																	2113.34	5.94206
Rader	4	rader-33																	2170.87	14.9074
Rader	4	rader-81																	2189.62	28.4378
Rader	4	rader-62																	2577.65	8.44018
Rader	4	rader-32																	2664.06	8.11421
Rader	4	rader-53																	2702.05	2.5408
Rader	4	rader-67																	2745.04	7.35696
Rader	4	rader-34																	2753.67	16.624
Rader	4	rader-23																	2755.85	12.6136
Rader	4	rader-41																	3259.77	8.1723
Yates	5	yates-48																	265.096	5.21701
Yates	5	yates-76																	355.322	11.4284
Yates	5	yates-11																	369.77	5.22055
Yates	5	yates-64																	371.966	9.30993
Yates	5	yates-45																	389.752	10.8596
Yates	5	yates-70																	392.619	8.75747
Yates	5	yates-28																	409.625	7.90302
Yates	5	yates-R33-2																	411.82	7.02185
Yates	5	yates-R33-3																	412.109	6.83429
[truncated: 527 more rows]
