# Supplementary material
Source: publisher figshare collection journal article supplement (https://gsapubs.figshare.com/ndownloader/files/22412031)
Supplement: Supplementary file 1 [file 22412031 › SuppRefsCited.docx]

**References Cited for Supplemental Materials**

Satkoski, A.M., Wilkinson, B.H., Hietpas, J., and Samson, S.D., 2013, Likeness among detrital zircon populations—An approach to the comparison of age frequency data in time and space: Geological Society of America Bulletin, v. 125, no. 11–12, p. 1783–1799, https://doi.org/10.1130/B30888.1.

Vermeesch, P., 2012, On the visualization of detrital age distributions: Chemical Geology, v. 312, p. 190–194, https://doi.org/10.1016/j.chemgeo.2012.04.021.
